# Supplementary material
Source: publisher figshare collection journal article supplement (https://gsajournals.figshare.com/ndownloader/files/30747085)
Supplement: Supplementary file 1 [file 30747085]

## Sheet: MB_DEAnalysis
Supplementary Data S3
Tables containing differential expression analysis results of each comparison between stages in the X. laevis midbrain.
Highlighted rows indicate genes considered differentially expressed, with an adjusted p-value < 0.05 and an absolute log2fold change > 2.

## Sheet: MB_st44v46
geneSymbol	baseMean	log2FoldChange	lfcSE	stat	pvalue	padj	NPC Enriched	IN Enriched
12S ribosomal RNA	77.0496	-0.170861	0.310986	-0.549418	0.582718	1
16S ribosomal RNA	27009	-0.0218309	0.15069	-0.144874	0.884811	1
1a11.L	6.53734	-0.391897	0.943465	-0.415381	0.677863	1
42sp43.L	1.59716	-2.21285	2.26656	-0.976303	0.328914	1
42sp50.L	4.39422	0.150383	1.42024	0.105886	0.915673	1		X
ATP6	422.192	0.281985	0.182588	1.54438	0.122495	1
ATP8	24.8953	0.104647	0.498485	0.209931	0.833722	1
COX1	19338.1	0.169458	0.117476	1.44249	0.149164	1
COX2	3788.69	0.428017	0.203123	2.10718	0.0351019	0.927033
COX3	5527.09	0.249649	0.172735	1.44527	0.148381	1
CYTB	29.3519	0.33364	0.54738	0.609522	0.542179	1
LOC100036663.S	1.80625	-3.36147	2.3588	-1.42508	0.154135	1
LOC100036800.S	1.12252	0	3.42063	0	1	1
LOC100036803	679.422	0.0378768	0.153186	0.247261	0.804707	1
LOC100036818	4.79567	1.45694	1.23579	1.17895	0.238418	1
LOC100036823	5.10454	1.53622	1.22584	1.2532	0.210134	1
LOC100036824	1.67297	-2.68017	2.60931	-1.02716	0.304347	1
LOC100036831	399.79	0.243635	0.191708	1.27086	0.203777	1
LOC100036845	5.87299	1.14458	1.57908	0.724843	0.468548	1
LOC100036845.L	1.28729	-0.916324	2.76672	-0.331194	0.740498	1
LOC100036869	96.7205	0.368031	0.320141	1.14959	0.250313	1
LOC100036872	9.09164	0.284213	0.921676	0.308365	0.757804	1
LOC100036883	1.51176	0	3.03046	0	1	1
LOC100036897	1.13502	0.73636	2.70059	0.272666	0.78511	1
LOC100036907.L	49.3918	0.627879	0.492691	1.27439	0.202527	1
LOC100036910	700.899	0.0036218	0.24879	0.0145576	0.988385	1
LOC100036915	267.056	0.0213721	0.199756	0.106991	0.914796	1
LOC100036932	4.0773	1.39897	1.80023	0.777109	0.437095	1
LOC100036952	22.047	0.0373993	0.621784	0.0601484	0.952037	1
LOC100036976	10.7305	0.255783	0.884475	0.289192	0.772434	1
LOC100036994	368.702	0.181141	0.190442	0.951159	0.341524	1
LOC100036997	31.1515	0.227384	0.535241	0.424824	0.670965	1
LOC100037001	448.341	0.0265452	0.174917	0.151759	0.879377	1
LOC100037016	18.1945	0.339591	0.800988	0.423965	0.671591	1
LOC100037047	1.04821	-3.44694	2.76899	-1.24484	0.213192	1
LOC100037090	242.52	0.128307	0.220983	0.58062	0.561497	1
LOC100037108	629.886	0.240981	0.174311	1.38248	0.166826	1
LOC100037118	31.0167	-0.698639	0.612289	-1.14103	0.253858	1
LOC100037145	10.6997	0.144775	0.940406	0.153949	0.87765	1
LOC100037177	60.8503	0.830476	0.810939	1.02409	0.305792	1
LOC100037180	9.87896	0.129988	1.12122	0.115935	0.907704	1
LOC100037204	2.1138	3.07584	2.12595	1.44681	0.14795	1
LOC100037213	418.489	0.255633	0.204916	1.24751	0.212212	1
LOC100037217	31.4085	1.26443	0.500668	2.52549	0.0115536	0.731522
LOC100037226	194.274	0.513923	0.25128	2.04522	0.0408333	0.958856
LOC100037235	62.35	-0.178411	0.346375	-0.515081	0.606496	1
LOC100037903.1	2.65372	-1.21104	1.40272	-0.86335	0.387945	1
LOC100049113	12.4194	-0.6373	0.854224	-0.746058	0.455633	1
LOC100049116	351.463	0.019107	0.175962	0.108586	0.913531	1
LOC100049121	324.809	0.771371	0.237251	3.25128	0.00114885	0.390583
LOC100049127	61.3578	0.220333	0.316713	0.695686	0.486626	1
LOC100049136	1713.67	0.596908	0.200151	2.98228	0.0028611	0.50677
LOC100049756	2.39611	0.447123	1.884	0.237327	0.812403	1
LOC100101277	216.212	0.382974	0.195932	1.95463	0.0506267	0.986468
LOC100101281	49.6533	0.382412	0.345624	1.10644	0.268537	1
LOC100101282	7.8298	0.336805	1.11061	0.30326	0.761691	1
LOC100101283	87.7329	-0.302388	0.344509	-0.877737	0.380087	1		X
LOC100101333	88.1008	-0.270616	0.35829	-0.755298	0.45007	1
LOC100125664	5.57346	-0.145388	1.28366	-0.11326	0.909824	1
LOC100125668	243.621	-0.284741	0.311152	-0.915119	0.360129	1
LOC100126603	30.4162	0.0818208	0.44549	0.183665	0.854276	1
LOC100126627	1.39741	3.51317	2.70642	1.29809	0.194258	1
LOC100126638	30.7823	-0.0722857	0.455226	-0.158791	0.873834	1
LOC100126648	82.0987	0.121995	0.332113	0.36733	0.713373	1
LOC100126651	20.8759	0.241802	0.587333	0.411695	0.680563	1
LOC100126657	3.31009	0.380528	1.41726	0.268496	0.788317	1
LOC100126660	98.5135	0.00976532	0.305135	0.0320033	0.974469	1
LOC100127249	1.29718	0.820844	2.82148	0.290927	0.771107	1
LOC100127277	27.339	-0.352926	0.749313	-0.470999	0.637641	1
LOC100127280	27.1517	-0.586675	0.555667	-1.0558	0.291058	1
LOC100127286	21.1439	0.376611	0.581767	0.647357	0.517401	1
LOC100127287	2.3652	-1.03779	2.02273	-0.513066	0.607905	1
LOC100127296	104.984	-0.0666615	0.284287	-0.234487	0.814607	1
LOC100127300	119.273	0.494979	0.278326	1.77842	0.0753357	1
LOC100127316	54.3099	0.278174	0.403966	0.688606	0.491071	1
LOC100127323	118.065	-0.305512	0.313846	-0.973446	0.330332	1
LOC100127329	1961.72	0.00383225	0.100782	0.0380253	0.969668	1
LOC100127334	2.94365	-1.0689	2.28554	-0.467681	0.640013	1
LOC100127794.L	21.031	1.14198	0.984131	1.16039	0.245889	1
LOC100135120.L	105.348	-0.278896	0.280589	-0.993968	0.320238	1
LOC100135146.L	3.77925	1.41529	1.5793	0.896149	0.370173	1
LOC100135146.S	4.55752	1.28177	1.26759	1.01119	0.311925	1
LOC100137612	78.0131	0.0677716	0.299756	0.226089	0.821132	1
LOC100137633	4.06569	-0.646801	1.83132	-0.353187	0.723948	1
LOC100137634	228.452	-0.0631968	0.231143	-0.27341	0.784538	1		X
LOC100137643	3.66984	1.04037	1.60204	0.649401	0.516079	1
LOC100137665	4.49022	-0.807033	1.32875	-0.607361	0.543612	1
LOC100137672	23.0817	0.365197	0.589607	0.619391	0.535659	1
LOC100137672.S	111.763	0.643423	0.292184	2.20211	0.0276573	0.889965
LOC100137678	2.38663	-2.96729	2.23416	-1.32815	0.18413	1
LOC100137691	39.5655	0.608351	0.409196	1.4867	0.137095	1
LOC100137715	1.23852	-1.11269	3.04261	-0.365702	0.714587	1
LOC100145345.L	6.88824	0.414695	1.00695	0.411831	0.680464	1
LOC100145450.S	138.558	0.255508	0.237661	1.07509	0.282332	1
LOC100145473.S	0.833656	-0.107101	4.13755	-0.0258851	0.979349	1
LOC100145531.L	21.7098	1.07841	0.573314	1.88101	0.0599712	1
LOC100145533.L	32.2171	0.120896	0.560782	0.215584	0.829312	1
LOC100158280	5.42251	-1.55161	1.58845	-0.97681	0.328663	1
LOC100158299	288.377	0.0343563	0.191397	0.179502	0.857543	1
LOC100158305.L	8.71505	-0.0226525	1.95695	-0.0115754	0.990764	1
LOC100158314	1.83778	0.854659	2.53664	0.336925	0.736173	1
LOC100158321	104.844	0.0211206	0.384025	0.0549981	0.95614	1
LOC100158331	34.784	0.0659394	0.54995	0.119901	0.904562	1
LOC100158340	743.019	-0.0406537	0.159933	-0.254192	0.799347	1
LOC100158347	217.995	-0.22067	0.219182	-1.00679	0.314037	1
LOC100158361	288.106	-0.115138	0.237334	-0.485129	0.627585	1
LOC100158366	15.9368	-2.66679	0.756608	-3.52467	0.000424014	0.297094
LOC100158370	143.857	-0.0922973	0.247947	-0.372246	0.70971	1
LOC100158382	120.119	0.111258	0.23484	0.473763	0.635669	1
LOC100158389	1.73351	-0.326544	2.0953	-0.155846	0.876155	1
LOC100158394	231.721	-0.225998	0.177244	-1.27506	0.202287	1
LOC100158410.L	92.5139	0.166262	0.295764	0.562143	0.574018	1
LOC100158433.L	41.2036	0.146166	0.388718	0.376021	0.706901	1
LOC100158544.S	0.874413	-3.91368	3.08533	-1.26848	0.204627	1
LOC100170619.S	6.28503	-0.151922	1.03879	-0.146248	0.883725	1
LOC100174801	6.93855	-0.237711	1.27762	-0.186057	0.8524	1
LOC100174804	476.356	-0.241606	0.237074	-1.01912	0.308148	1
LOC100174808	2.73476	1.27516	1.9458	0.655338	0.51225	1
LOC100189560	139.165	0.137547	0.37233	0.369423	0.711812	1
LOC100189574	115.074	0.0291639	0.275642	0.105804	0.915738	1
LOC100191024	23.5494	0.458165	0.618202	0.741125	0.458617	1
LOC100191026	282.476	-0.115264	0.17672	-0.652244	0.514244	1
LOC100192369	14.3671	0.32189	0.690081	0.466452	0.640892	1
LOC100217319	65.7123	0.281046	0.771075	0.364486	0.715495	1
LOC100301958	51.8825	0.314452	0.413644	0.760199	0.447136	1
LOC100335021	19.9947	-0.26635	0.571879	-0.465745	0.641398	1
LOC100335115	1184.31	0.214261	0.746447	0.287041	0.774081	1
LOC100337617	2.10475	0.505617	2.21271	0.228506	0.819253	1
LOC100379118	13.6341	0.165259	0.813712	0.203092	0.839063	1
LOC100462904	1013.69	-0.096293	0.169939	-0.566633	0.570963	1
LOC100462905	1008.19	0.187588	0.228137	0.822258	0.41093	1
LOC100485017.S	1.81832	0.743823	2.3566	0.315634	0.75228	1
LOC100485044.L	3.34808	-0.294692	1.44872	-0.203416	0.83881	1
LOC100485105.S	1.77263	3.30875	2.40609	1.37516	0.169083	1
LOC100485199-like.S	30.8131	0.24672	0.592757	0.416225	0.677246	1
LOC100485290.L	44.2678	0.215712	0.397518	0.542647	0.587373	1
LOC100485292.L	3.01744	1.82916	1.99396	0.917351	0.358959	1
LOC100485470.1.L	24.7381	0.58131	0.634162	0.916657	0.359322	1
LOC100485669.L	15.8257	-1.21391	1.09835	-1.10521	0.269069	1
LOC100485723.L	2.07975	-1.60613	2.0106	-0.798832	0.424388	1
LOC100485829.S	15.4112	2.31981	1.57496	1.47293	0.14077	1
LOC100485975.L	2.73812	2.67706	2.26137	1.18383	0.236482	1
LOC100486127.S	10.3846	-1.40349	1.00694	-1.39382	0.163373	1
LOC100486133.S	78.3363	0.298843	0.386022	0.774161	0.438835	1
LOC100486352-like.S	1.09401	-0.107123	3.03048	-0.0353484	0.971802	1
LOC100486380.L	6.92637	0.82422	0.941336	0.875585	0.381255	1
LOC100486434-like.L	1.44457	-0.0661043	2.36525	-0.0279481	0.977704	1
LOC100486734-like.L	4.57354	1.69909	1.17325	1.44819	0.147564	1
LOC100486734-like.S	4.00247	0.518753	1.29395	0.400906	0.688489	1
LOC100486894.S	1.72942	-0.242431	1.7114	-0.141657	0.887351	1
LOC100486966.L	5.31315	-0.810417	1.26521	-0.64054	0.521822	1
LOC100487224.L	74.0552	0.294378	0.467128	0.630186	0.528573	1
LOC100487262.S	70.1119	-0.10486	0.286665	-0.365794	0.714519	1
LOC100487412.L	1.96313	-0.922739	2.49587	-0.369705	0.711602	1
LOC100487482.S	1.60969	2.28573	2.57925	0.8862	0.37551	1
LOC100487499.S	223.009	0.324809	0.189782	1.71148	0.0869918	1
LOC100487668.L	11.814	-0.634403	0.750024	-0.845844	0.39764	1
LOC100487740.S	1.99313	-0.823574	2.16149	-0.381022	0.703187	1
LOC100488087.L	23.9403	0.083884	0.583655	0.143722	0.88572	1
LOC100488177.S	2.37007	-2.49853	1.69407	-1.47487	0.140247	1
LOC100488227.L	1.6941	1.71159	2.5121	0.681337	0.495658	1
LOC100488333.L	16.8424	0.690926	0.727937	0.949156	0.342541	1
LOC100488348.S	4.38502	-0.809621	1.23074	-0.657833	0.510646	1
LOC100488442.S	23.1953	-0.190384	0.589562	-0.322925	0.746752	1
LOC100488486.L	2.634	0.516854	1.42867	0.361772	0.717522	1
LOC100488567.L	125.525	-0.476604	0.268578	-1.77455	0.0759726	1
LOC100488577.L	3.49837	0.647186	1.85326	0.349215	0.726928	1
LOC100488626.L	45.82	-0.248523	0.367554	-0.676153	0.498944	1
LOC100488689.S	100.338	0.055944	0.375866	0.14884	0.88168	1
LOC100488697.L	4.6125	3.73279	1.7625	2.11789	0.0341843	0.92479
LOC100488701.S	2.60916	2.14304	2.00267	1.07009	0.284579	1
LOC100488828.L	1.26721	-1.90453	2.63795	-0.721971	0.470312	1
LOC100488885-like.L	356.046	0.199822	0.166787	1.19807	0.230889	1
LOC100489122.L	11.0571	-0.337322	0.891417	-0.37841	0.705126	1
LOC100489188.L	6.96266	0.064544	1.14734	0.0562552	0.955138	1
LOC100489326.S	7.44812	-0.0868601	1.04279	-0.0832956	0.933617	1
LOC100489554.L	1.12004	0.854639	3.36726	0.253808	0.799644	1
LOC100489764.L	2.14716	-0.641706	1.84839	-0.347171	0.728463	1
LOC100489771.S	70.2018	0.213725	0.352401	0.606482	0.544195	1
LOC100489773-like.S	23.4693	-0.601015	0.587418	-1.02315	0.306238	1
LOC100489832.L	1.18282	-0.0290482	2.37026	-0.0122552	0.990222	1
LOC100489882.L	1.44018	-1.06892	2.8542	-0.374508	0.708027	1
LOC100490018.L	3.80207	-1.46071	1.53294	-0.952881	0.34065	1
LOC100490389-like.L	1.6631	1.0161	2.37013	0.428711	0.668134	1
LOC100490462.L	3.07423	4.15986	1.77363	2.3454	0.0190069	0.841003
LOC100490530.L	60.0348	0.274116	0.304119	0.901343	0.367406	1
LOC100490553.S	1.50608	0	2.86634	0	1	1
LOC100490559.S	31.3141	-0.377833	0.447072	-0.845129	0.398039	1
LOC100490741.L	36.4257	0.585973	0.489767	1.19643	0.231529	1
LOC100490918.L	1.70406	-1.42717	2.10325	-0.678556	0.497419	1
LOC100490937.L	1.25765	1.77517	2.44074	0.72731	0.467036	1
LOC100491211.L	8.09842	-1.68997	1.21354	-1.3926	0.163742	1
LOC100491437-like.L	22.8796	1.01859	0.740186	1.37613	0.168782	1
LOC100491450.S	8.72397	-0.59056	0.855859	-0.69002	0.490181	1
LOC100491454.L	1.79952	0.619968	1.9429	0.319094	0.749655	1
LOC100491587.L	2.95658	-1.51613	2.04803	-0.740288	0.459125	1
LOC100491616-like.L	9.2335	0.928615	0.911068	1.01926	0.308079	1
LOC100491629.S	1.38906	0.519054	2.44238	0.21252	0.831702	1
LOC100491907.S	2.72798	1.20389	1.4795	0.813718	0.415806	1
LOC100491930.L	8.12813	-4.2457	1.58269	-2.68259	0.00730544	0.653903
LOC100491939.S	225.955	-0.448663	0.196844	-2.27928	0.0226507	0.860692
LOC100492080.1	1.62793	-1.44293	2.31923	-0.622159	0.533838	1
LOC100492197-like.L	330.819	0.0159435	0.181417	0.0878834	0.929969	1
LOC100492420.S	2.15204	0.675946	1.78786	0.378075	0.705375	1
LOC100492487.S	145.206	0.050693	0.323737	0.156587	0.875571	1
LOC100492639-like.S	2.64606	-0.0581203	1.38722	-0.041897	0.966581	1
LOC100492643.L	1.45606	2.05834	2.42986	0.847101	0.396939	1
LOC100492708	36.0038	-0.0441023	0.46614	-0.0946118	0.924623	1
LOC100492859.S	1.80366	-0.956227	2.16213	-0.442262	0.6583	1
LOC100492885.L	63.649	-0.268905	0.359048	-0.74894	0.453894	1
LOC100492888-like.L	19.8296	0.601341	0.711085	0.845667	0.397738	1
LOC100492899.L	3.09139	-0.251942	1.73533	-0.145184	0.884565	1
LOC100492951-like.S	238.189	0.00585139	0.245802	0.0238053	0.981008	1
LOC100493071.L	4.49678	0.350995	1.7289	0.203016	0.839123	1
LOC100493076.L	1.01171	2.45555	3.10448	0.79097	0.428962	1
LOC100493184.L	1.51629	-2.53948	2.30237	-1.10298	0.270035	1
LOC100493237.L	3.69492	0.243105	1.94192	0.125188	0.900375	1
LOC100493283-like.L	33.6461	0.00968482	0.458229	0.0211353	0.983138	1
LOC100493356.L	1.08105	-2.25893	2.78592	-0.810837	0.417459	1
LOC100493381.L	1.41802	-1.87944	2.70356	-0.69517	0.486949	1
LOC100493382.L	79.6197	-0.216745	0.320213	-0.676876	0.498485	1
LOC100493512.1	1.05939	2.78688	2.88633	0.965545	0.334272	1
LOC100493618.L	1.87858	1.34118	2.3993	0.558988	0.57617	1
LOC100493672.L	1.46381	1.32711	2.37436	0.558931	0.576209	1
LOC100493745.L	268.344	0.132687	0.204577	0.648589	0.516604	1
LOC100493912.S	23.0965	0.673846	0.651617	1.03411	0.301082	1
LOC100493955.L	1.47515	-0.266872	2.77743	-0.096086	0.923452	1
LOC100493968.1.L	32.127	-0.0744947	0.64584	-0.115345	0.908171	1
LOC100494033.L	4.86352	0.195938	1.32504	0.147873	0.882443	1
LOC100494136.L	2.84899	0.805084	1.81854	0.442709	0.657976	1
LOC100494386.L	14.9147	0.15504	0.595859	0.260195	0.794713	1
LOC100494476.L	69.0303	0.441025	0.349634	1.26139	0.207168	1
LOC100494536.S	1.78395	-2.74015	2.20317	-1.24373	0.2136	1
LOC100494604.L	1.29805	-1.06891	2.8288	-0.377866	0.70553	1
LOC100494943.L	1.45592	0	3.03409	0	1	1
LOC100495010.S	96.5166	-0.0604338	0.271761	-0.222378	0.824019	1
LOC100495012.S	1.978	-3.40263	2.03523	-1.67186	0.0945513	1
LOC100495096.1	1.58538	1.29941	2.28578	0.568474	0.569713	1
LOC100495101.S	1.88084	-1.0689	2.56276	-0.417089	0.676613	1
LOC100495179.L	9.07719	2.31331	1.04842	2.20648	0.0273507	0.889965
LOC100495222.1.L	1.74412	3.69692	2.43621	1.51749	0.129144	1
LOC100495347.1	1.78709	-2.72845	2.19728	-1.24174	0.214333	1
LOC100495379.L	2.80824	-0.747255	1.64674	-0.453777	0.649989	1
LOC100495655-like.S	1.49785	0	2.76146	0	1	1
LOC100495874.L	1.10773	-1.06892	3.47907	-0.307244	0.758658	1
LOC100495895.S	74.9572	-0.220197	0.325311	-0.676882	0.498481	1
LOC100496010.S	9.55725	-0.683637	0.821375	-0.832307	0.405236	1
LOC100496074-like.L	6.14292	-0.424268	0.972431	-0.436296	0.662622	1
LOC100496137-like.L	37.5101	0.303573	0.567775	0.534671	0.592878	1
LOC100496293.L	1.50435	3.35803	2.60435	1.28939	0.197261	1
LOC100496329.S	10.5843	0.272893	0.94543	0.288645	0.772853	1
LOC100496372.L	1.62932	0	2.99762	0	1	1
LOC100496462.L	21.624	0.547226	0.739107	0.740388	0.459064	1
LOC100496618.L	1.18367	2.02123	2.64252	0.764887	0.444339	1
LOC100496658.L	12.0359	0.935369	0.800782	1.16807	0.242779	1
LOC100496716.L	35.412	-0.279591	0.635519	-0.439942	0.659979	1
LOC100496797-like.L	34.8152	-0.507832	0.559781	-0.907198	0.364302	1
LOC100496797.L	129.416	-0.629149	0.306218	-2.05458	0.0399197	0.950138
LOC100496837.S	4.42662	-0.844673	1.29268	-0.653426	0.513481	1
LOC100496844.L	3.79966	-0.55912	1.31105	-0.426469	0.669766	1
LOC100496870.L	5.09047	-0.895912	1.19357	-0.750612	0.452886	1
LOC100496873.L	2.63081	2.7136	1.8697	1.45136	0.146681	1
LOC100496891.S	3.5588	1.65264	1.28966	1.28145	0.200036	1
LOC100496975.L	2.08035	1.83208	2.55574	0.716851	0.473466	1
LOC100496975.S	40.265	-0.804432	0.419268	-1.91866	0.0550272	0.995876
LOC100497020.L	9.80164	-1.07392	0.942958	-1.13888	0.254752	1
LOC100497184.L	247.777	-0.0439684	0.249508	-0.176221	0.860121	1
LOC100497309.L	3.92063	1.69721	1.65414	1.02604	0.304872	1
LOC100497432.L	1.21096	0	3.49575	0	1	1
LOC100497489.S	10.8505	0.368354	0.776035	0.474661	0.635028	1
LOC100497500.S	3.32529	1.65431	1.48232	1.11603	0.264411	1
LOC100497556.L	4.0537	1.18285	1.29391	0.914167	0.360629	1
LOC100497703.S	13.2074	1.04046	0.768213	1.35439	0.175613	1
LOC100497709.L	3.35406	0.616081	1.40656	0.438006	0.661382	1
LOC100497740.L	4.90745	1.41282	2.00979	0.702971	0.482074	1
LOC100497848.L	3.64308	-2.92542	1.76938	-1.65336	0.0982581	1
LOC100497909.S	11.4367	3.49856	1.04845	3.33689	0.000847226	0.363101
LOC100497953.L	13.5743	0.553366	0.778669	0.710657	0.477297	1
LOC100498064.L	1.62266	-1.31902	2.0597	-0.640394	0.521916	1
LOC100498247.S	1.32667	-0.885484	2.31611	-0.382315	0.702228	1
LOC100498327.L	13.4315	0.461283	0.75097	0.614249	0.539051	1
LOC100498450.S	1.78981	0.576876	1.96606	0.293417	0.769203	1
LOC100498477.L	2.42838	-2.58469	2.36511	-1.09284	0.274463	1
LOC100498517.L	27.5458	0.0928262	0.451899	0.205414	0.837249	1
LOC100498590.S	1.75614	-0.995851	2.06767	-0.481631	0.630068	1
LOC100498594.S	1.78526	-0.119287	2.58252	-0.0461902	0.963159	1
LOC100505442	178.084	0.0293654	0.239499	0.122612	0.902415	1
LOC100505446	429.898	-0.0428503	0.183599	-0.23339	0.815458	1
LOC100653495	126.748	-0.109971	0.308762	-0.356166	0.721716	1
LOC100653497	74.2949	-0.159318	0.334739	-0.475945	0.634114	1
LOC100653500	4.51812	-0.334421	1.15249	-0.290172	0.771685	1
LOC100653501	3.56339	-0.986727	1.5642	-0.630818	0.52816	1
LOC100653508	185.27	0.0170278	0.235015	0.072454	0.942241	1
LOC100653509	852.261	-0.248253	0.167642	-1.48085	0.138645	1
LOC101027264	24.5611	0.0627962	0.672406	0.0933903	0.925594	1
LOC101027269	34.9117	-0.450674	0.427411	-1.05443	0.291687	1
LOC101027277	990.696	-0.115834	0.150212	-0.771141	0.440623	1
LOC101027278	1053.46	0.00855288	0.14586	0.0586375	0.953241	1
LOC101027285	821.057	-0.13851	0.15937	-0.869109	0.384787	1
LOC101027288	568.172	-0.109555	0.177236	-0.618128	0.536491	1
LOC101027289	2.80304	-3.38842	2.05285	-1.65059	0.0988222	1
LOC101027292	28.7802	-0.0538267	0.572884	-0.0939574	0.925143	1
LOC101027307	7.11365	-0.041195	1.23702	-0.0333017	0.973434	1
LOC101027309	339.362	-0.0519486	0.201428	-0.257902	0.796483	1
LOC101243550	136.638	-0.167273	0.295394	-0.566272	0.571209	1
LOC101243553	19.8509	0.605148	0.619109	0.977449	0.328347	1
LOC101243554	31.6287	0.46236	0.740683	0.624234	0.532474	1
LOC101730276.L	24.6016	0.691462	0.817645	0.845675	0.397734	1
LOC101730314.L	54.3675	-0.96683	0.432945	-2.23315	0.0255392	0.885181
LOC101730464.L	2.16342	0.746869	2.25023	0.331908	0.739959	1
LOC101730503.L	1.37771	-0.752124	2.27555	-0.330524	0.741004	1
LOC101730510.1	1.32833	0	3.3501	0	1	1
LOC101730652.S	4.153	1.25742	1.27919	0.98298	0.325617	1
LOC101730692.L	4.26171	-0.136722	1.46625	-0.0932459	0.925708	1
LOC101730710.L	1.75621	-1.89866	2.55809	-0.742219	0.457955	1
LOC101730711.S	28.7605	-0.316535	0.480358	-0.658957	0.509924	1
LOC101730741.L	1.16715	0.841662	2.94726	0.285574	0.775204	1
LOC101730771-like.L	1.13079	0	3.64498	0	1	1
LOC101730771-like.S	1.11794	-1.06891	2.82736	-0.378059	0.705387	1
LOC101730807.L	1.1131	2.81923	2.74028	1.02881	0.303567	1
LOC101730911.S	1.48289	1.41335	2.8113	0.50274	0.615147	1
LOC101730997.L	1.78284	0.0454113	2.47684	0.0183344	0.985372	1
LOC101730999.S	1.78917	-0.0524029	2.14449	-0.0244361	0.980505	1
LOC101731180.S	0.963278	1.85304	3.63647	0.50957	0.610353	1
LOC101731218.S	55.4173	-0.0553661	0.441043	-0.125535	0.9001	1		X
LOC101731372.S	1.29654	1.11729	2.27438	0.49125	0.62325	1
LOC101731405.L	20.0377	0.402776	0.648156	0.621418	0.534325	1
LOC101731405.S	7.66646	-1.57339	1.20248	-1.30846	0.190718	1
LOC101731454.L	5.44258	-0.887747	1.21122	-0.732936	0.463598	1
LOC101731554.S	1.26387	-1.06891	2.93493	-0.364202	0.715707	1
LOC101731692.S	0.935673	-1.8759	3.32403	-0.564345	0.572519	1
LOC101731735.L	16.8778	0.199295	0.723696	0.275384	0.783021	1
LOC101731735.S	32.3879	0.485455	0.522461	0.929169	0.352801	1
LOC101731753.L	1.17494	-1.06548	2.65925	-0.400667	0.688665	1
LOC101731794.L	1.50411	-2.80462	2.7203	-1.031	0.302542	1
LOC101732168.S	1.94601	-0.16712	1.88927	-0.0884572	0.929513	1
LOC101732174.L	3.98954	1.66018	1.29144	1.28553	0.198609	1
LOC101732183.L	18.0364	0.114737	0.552711	0.20759	0.835549	1
LOC101732265-like.L	2.99561	-0.743865	1.96414	-0.378723	0.704893	1
LOC101732299.L	14.0667	0.0543037	0.812946	0.0667987	0.946742	1
LOC101732334	1.17496	2.22424	3.64818	0.609683	0.542072	1
LOC101732336.L	5.991	-0.808989	1.0494	-0.770908	0.440761	1
LOC101732363.S	5.89145	1.63728	1.08502	1.50898	0.131303	1
LOC101732646	36.4001	-0.249635	0.499757	-0.499513	0.617418	1
LOC101732807.L	214.658	-0.201759	0.202728	-0.995218	0.31963	1
LOC101732837.L	14.1126	-1.17525	0.642257	-1.82988	0.0672674	1
LOC101732880.S	9.70706	-1.82587	1.10133	-1.65788	0.0973417	1
LOC101732886.L	1.45055	-1.06891	2.56026	-0.417501	0.676312	1
LOC101732896.L	1.55964	-1.06891	2.92747	-0.365131	0.715014	1
LOC101732913.L	0.854846	0	3.9953	0	1	1
LOC101732945.L	58.8635	-0.365753	0.396207	-0.923136	0.355936	1
LOC101733023.S	2.80282	3.0183	2.2378	1.34878	0.177408	1
LOC101733142.L	1.64016	-1.19328	2.24054	-0.532587	0.59432	1
LOC101733157.L	1.19327	-2.14586	2.50444	-0.85682	0.391544	1
LOC101733178.L	39.386	0.0721205	0.492151	0.146541	0.883494	1
LOC101733219.L	3.07624	-2.55444	2.04744	-1.24763	0.212167	1
LOC101733221.L	3.92593	1.03926	1.3603	0.76399	0.444873	1
LOC101733232.S	11.9182	0.0510787	0.79063	0.064605	0.948488	1
LOC101733399.1.L	2.04809	0.80532	1.63811	0.491615	0.622992	1
LOC101733496-like.L	74.4959	0.204484	1.00766	0.20293	0.83919	1
LOC101733559.L	221.341	-0.0525214	0.28839	-0.182119	0.855489	1
LOC101733560.1.S	156.072	0.0434918	0.288323	0.150844	0.880099	1
LOC101733572.S	7.8143	-0.0959768	0.942506	-0.101832	0.91889	1
LOC101733597.1.S	2.28967	1.20247	1.64554	0.730743	0.464936	1
LOC101733718-like.L	9.66329	0.251995	0.877535	0.287162	0.773988	1
LOC101733845.L	1.42257	-0.35842	2.35467	-0.152217	0.879016	1
LOC101733845.S	6.39957	1.08694	1.14024	0.953255	0.340461	1
LOC101733888.L	5.13467	-1.55553	1.32158	-1.17702	0.239186	1
LOC101733911.L	2.34317	-0.415406	2.105	-0.197342	0.84356	1
LOC101733911.S	1.78196	0.337055	2.31398	0.14566	0.88419	1
LOC101734116.1.L	15.5873	1.74429	1.2122	1.43894	0.150166	1
LOC101734172.L	2.57025	0.760132	1.97661	0.384564	0.70056	1
LOC101734280.L	16.5327	-0.59247	0.672877	-0.880504	0.378587	1
LOC101734280.S	9.92314	-0.547726	0.987165	-0.554848	0.578999	1
LOC101734284-like.L	4.53807	0.463845	1.32755	0.349398	0.72679	1
LOC101734474.S	2.7582	-1.22713	1.46557	-0.837305	0.402421	1
LOC101734516.L	32.3796	-0.201365	0.470318	-0.428145	0.668545	1
LOC101734522.1	3.2539	0.196069	1.45472	0.134782	0.892784	1
LOC101734588.L	1.2265	-1.76746	2.68491	-0.658294	0.51035	1
LOC101734605.L	29.4627	-0.547244	0.606497	-0.902302	0.366896	1
LOC101734643.L	6.23228	-0.00350542	1.34678	-0.00260281	0.997923	1	X
LOC101734771.L	1.74509	-0.518689	2.17662	-0.238301	0.811648	1
LOC101734788.S	4.13569	0	2.17971	0	1	1
LOC101734868.L	1.92437	2.63182	1.93134	1.36269	0.17298	1
LOC101734868.S	1.7433	-0.921365	2.54729	-0.361704	0.717573	1
LOC101734999.S	111.428	0.120458	0.366564	0.328615	0.742447	1
LOC101735002.S	2.67447	-2.19752	2.26896	-0.968513	0.332788	1
LOC101735009.S	56.6607	-0.824427	0.353723	-2.33072	0.0197684	0.843151
LOC101735010.S	1.37886	0.792778	2.65213	0.298922	0.765	1
LOC101735056.L	63.5704	0.188272	0.365562	0.515021	0.606539	1
LOC101735082.S	1.03736	-0.107113	2.89774	-0.0369643	0.970513	1
LOC101735121-like.L	45.3019	0.142595	0.457147	0.311924	0.755098	1
LOC101735124-like.S	15.7107	-0.271146	0.7102	-0.381788	0.702619	1
LOC105945384.S	1.5427	-1.63069	2.33074	-0.699643	0.484151	1
LOC105945417.L	57.7736	0.0651016	0.497439	0.130874	0.895875	1
LOC105945479	1.19756	0.387604	3.02549	0.128113	0.89806	1
LOC105945545.L	9.78012	0.291939	1.00968	0.28914	0.772474	1
LOC105945780.L	45.5232	-0.395808	0.526744	-0.751424	0.452398	1
LOC105945786.L	1.16895	-0.910621	3.10501	-0.293275	0.769312	1
LOC105946022.S	16.4078	-1.14764	0.709519	-1.61749	0.105773	1
LOC105946344.L	2.10135	-0.137463	2.02918	-0.0677428	0.94599	1
LOC105946425.L	1.31267	1.6923	3.11115	0.543945	0.586479	1
LOC105946688.L	18.0122	-0.0243498	0.628989	-0.0387126	0.969119	1
LOC105946688.S	1.86437	1.05742	1.70387	0.620598	0.534864	1
LOC105946830.L	2.23297	0.513662	2.09872	0.244749	0.80665	1
LOC105946874.L	2.41668	-0.298255	1.72437	-0.172965	0.862679	1
LOC105946897.L	3.2661	-0.158818	1.41359	-0.112351	0.910545	1
LOC105947003.L	4.97262	1.07041	1.2751	0.839472	0.401204	1
LOC105947173.L	1.35864	-1.06891	3.11028	-0.34367	0.731095	1
LOC105947229.L	3.7421	0.328584	1.33474	0.246178	0.805545	1
LOC105947339.L	1.45291	1.67767	2.41772	0.693905	0.487742	1
LOC105947410.L	41.0229	0.0444685	0.520284	0.0854696	0.931888	1
LOC105947450.S	65.9559	0.0550669	0.332038	0.165845	0.868279	1
LOC105947790.L	25.2869	1.37447	0.603267	2.27837	0.0227043	0.860692
LOC105947790.S	3.01703	1.46709	1.682	0.872232	0.383082	1
LOC105947835.S	1.57562	-3.18375	2.40416	-1.32427	0.185414	1
LOC105947871.L	53.3669	0.211307	0.399631	0.528755	0.596976	1
LOC105948127	1.31036	0	3.28974	0	1	1
LOC105948534	1.13184	-2.12566	2.72924	-0.778846	0.43607	1
LOC105948557.L	1.84961	0.0299366	2.44377	0.0122502	0.990226	1
LOC108695214	3.88939	-0.856277	1.30467	-0.656317	0.51162	1
LOC108695216	2.45464	0.121006	1.55641	0.0777467	0.93803	1
LOC108695217	70.1249	0.159971	0.441607	0.362247	0.717167	1
LOC108695218	2.31421	0.0321967	1.84324	0.0174675	0.986064	1
LOC108695221	29.3871	-0.0763385	0.540626	-0.141204	0.887709	1
LOC108695223	19.9007	0.637413	0.679675	0.93782	0.348337	1
LOC108695227	258.705	-0.33415	0.197857	-1.68884	0.0912491	1
LOC108695228	1.32893	-0.524358	2.22538	-0.235627	0.813722	1
LOC108695232	129.323	0.157603	0.318627	0.494632	0.62086	1
LOC108695237	62.1398	0.760214	0.403396	1.88454	0.0594925	1
LOC108695239	8.78167	-0.39437	0.792194	-0.49782	0.618611	1
LOC108695240	251.634	-0.0985149	0.224346	-0.439119	0.660575	1
LOC108695244	2.44716	2.55173	1.95939	1.30231	0.19281	1
LOC108695247	540.177	-0.12836	0.143784	-0.892728	0.372003	1
LOC108695251	174.641	-0.532303	0.226393	-2.35123	0.0187116	0.841003
LOC108695252	343.539	0.0497349	0.165464	0.300579	0.763736	1
LOC108695254	7.6694	-0.222237	0.9578	-0.232029	0.816516	1
LOC108695258	40.3824	0.492566	0.50468	0.975998	0.329066	1
LOC108695259	413.978	0.157819	0.171298	0.921313	0.356887	1
LOC108695260	254.772	0.135611	0.721034	0.188078	0.850815	1
LOC108695261	220.358	-0.127418	0.218842	-0.582237	0.560407	1
LOC108695263	46.1966	-0.636093	0.494514	-1.2863	0.198339	1
LOC108695265	8.40759	-1.58435	1.78536	-0.887412	0.374857	1
LOC108695270	393.222	-0.185951	0.162134	-1.14689	0.251426	1
LOC108695271	28.1173	0.857194	0.679712	1.26111	0.207268	1
LOC108695273	1.61135	-2.62613	2.10907	-1.24516	0.213073	1
LOC108695274	1.24707	0.116327	2.27275	0.0511834	0.959179	1
LOC108695278	33.6343	-0.0350192	0.476011	-0.073568	0.941354	1
LOC108695279	2.11669	0.147588	1.73911	0.0848642	0.932369	1
LOC108695284	1.3098	2.06989	3.0985	0.668029	0.504115	1
LOC108695285	309.83	-0.308771	0.178956	-1.72541	0.0844544	1
LOC108695290	3.0982	-0.084123	1.54429	-0.0544736	0.956558	1
LOC108695294	20.4141	-0.153711	0.590429	-0.260339	0.794603	1
LOC108695304	0.904696	0.944899	2.85886	0.330516	0.74101	1
LOC108695305	0.995491	0.292353	2.88283	0.101412	0.919224	1
LOC108695307	320.763	-0.0854293	0.165589	-0.515913	0.605915	1
LOC108695308	24.3438	0.0201194	0.453454	0.0443692	0.96461	1
LOC108695309	66.0879	0.601847	0.403743	1.49067	0.136049	1
LOC108695312	769.931	0.173559	0.167221	1.0379	0.299317	1
LOC108695316	72.3292	-0.231512	0.339329	-0.682263	0.495073	1
LOC108695319	1.44233	1.22273	2.43711	0.501712	0.61587	1
LOC108695329	533.495	-0.0326474	0.163486	-0.199696	0.841719	1
LOC108695330	2.66647	-1.92851	1.9508	-0.988572	0.322873	1
LOC108695331	84.1997	-0.641911	0.356904	-1.79855	0.0720894	1
LOC108695332	354.533	-0.385308	0.22637	-1.70212	0.0887336	1
LOC108695335	7.51776	-1.54326	1.03996	-1.48396	0.137819	1
LOC108695342	1.81288	0.097026	2.08729	0.0464842	0.962924	1
LOC108695343	48.9495	-0.552432	0.349219	-1.58191	0.113671	1
LOC108695344	25.306	1.1792	0.724992	1.62651	0.103842	1
LOC108695345	4199.24	0.302478	0.169164	1.78808	0.0737629	1
LOC108695348	3.6282	-1.04742	1.69798	-0.616865	0.537324	1
LOC108695349	340.751	0.30431	0.196069	1.55205	0.120649	1
LOC108695356	16.5991	1.24198	0.824774	1.50584	0.132108	1
LOC108695358	6.14524	0.96867	1.19951	0.807553	0.419348	1
LOC108695359	77.2051	0.558689	0.281154	1.98713	0.0469077	0.978621
LOC108695360	247.773	-0.144384	0.239676	-0.602413	0.546899	1	X
LOC108695362	1.09507	-2.54139	2.89241	-0.87864	0.379597	1
LOC108695366	1.25477	0.874384	2.68616	0.325514	0.744792	1
LOC108695370	54.8893	0.15313	0.370274	0.413559	0.679197	1
LOC108695373	65.4643	-0.0012003	0.374146	-0.00320811	0.99744	1
LOC108695374	163.125	-0.349724	0.247652	-1.41216	0.157903	1
LOC108695380	27.2919	0.699822	0.615432	1.13712	0.255487	1
LOC108695382	561.008	-0.545944	0.175635	-3.1084	0.00188104	0.429959
LOC108695386	6.15085	0.250102	1.14772	0.217912	0.827498	1
LOC108695387	15.6285	-0.436108	0.676778	-0.644389	0.519323	1
LOC108695393	1032.86	-0.308251	0.183004	-1.68439	0.0921064	1
LOC108695396	90.0238	-0.473104	0.312156	-1.5156	0.12962	1	X
LOC108695398	8.4895	-0.595799	1.01783	-0.585362	0.558304	1
LOC108695404	46.9333	0.322859	0.434238	0.743508	0.457174	1
LOC108695405	5.8099	0.502391	1.19812	0.419317	0.674985	1
LOC108695413	40.7088	-0.484254	0.549308	-0.881571	0.378009	1
LOC108695414	2.78497	-1.83471	1.83648	-0.999038	0.317776	1
LOC108695416	5.3431	0.251672	1.14521	0.21976	0.826058	1
LOC108695417	57.9639	-0.214287	0.341589	-0.627326	0.530446	1		X
LOC108695419	286.706	-0.258596	0.226728	-1.14056	0.254055	1
LOC108695420	43.7488	0.161758	0.370122	0.437039	0.662083	1
LOC108695421	1.50466	-1.48101	2.06776	-0.716236	0.473846	1
LOC108695426	3.38622	-0.0663408	1.71395	-0.0387064	0.969124	1
LOC108695427	89.969	0.381355	0.292721	1.30279	0.192645	1
LOC108695434	70.4702	0.281383	0.298329	0.943197	0.34558	1
LOC108695435	115.036	0.188236	0.2941	0.640041	0.522146	1
LOC108695438	123.278	0.268395	0.315972	0.849427	0.395644	1
LOC108695440	1282.47	-0.038681	0.173565	-0.222862	0.823643	1
LOC108695449	12.0888	-0.815038	0.69082	-1.17981	0.238075	1
LOC108695450	8.92068	1.44839	0.892366	1.62309	0.104571	1
LOC108695453	176.74	-0.0251432	0.208709	-0.12047	0.904111	1
LOC108695457	33.6961	-0.25603	0.464741	-0.55091	0.581696	1
LOC108695458	102.893	0.401398	0.246408	1.62899	0.103314	1
LOC108695459	260.917	-0.361833	0.178095	-2.03168	0.0421856	0.96394
LOC108695462	4.83065	-0.691969	1.33877	-0.51687	0.605247	1
LOC108695463	314.868	-0.226314	0.163505	-1.38414	0.166315	1
LOC108695464	2.22812	0.0728374	1.88053	0.0387325	0.969104	1
LOC108695465	11.7079	-0.0467629	1.09205	-0.0428212	0.965844	1		X
LOC108695467	1.47078	-0.788495	2.60005	-0.303262	0.76169	1
LOC108695469	1.60462	0.0341665	2.20462	0.0154977	0.987635	1
LOC108695470	2.22363	-1.78217	2.18779	-0.814598	0.415302	1
LOC108695472	3.80383	-1.89942	1.50091	-1.26551	0.205687	1
LOC108695473	3.7422	-0.629742	1.8852	-0.334046	0.738345	1
LOC108695474	86.6541	-0.00843035	0.335328	-0.0251406	0.979943	1
LOC108695484	3.91522	-0.0796386	1.37468	-0.0579325	0.953802	1
LOC108695486	1.32814	2.38189	2.76222	0.862311	0.388516	1
LOC108695487	45.6067	0.0277862	0.433591	0.0640839	0.948903	1
LOC108695491	0.894413	0.999435	2.40975	0.414747	0.678327	1
LOC108695492	317.614	-0.328207	0.218172	-1.50435	0.132491	1
LOC108695493	13.0081	-0.986793	0.835994	-1.18038	0.237848	1
LOC108695494	27.6936	-0.235915	0.51336	-0.45955	0.645839	1
LOC108695496	1.26993	-1.06891	2.95166	-0.362138	0.717249	1
LOC108695498	22.5503	0.436596	0.602588	0.724534	0.468738	1
LOC108695500	5.18947	-1.50646	1.45196	-1.03753	0.299489	1
LOC108695501	41.7603	-0.274853	0.464024	-0.592325	0.553633	1
LOC108695502	320.049	-0.0920178	0.214703	-0.428582	0.668228	1
LOC108695503	99.4041	-0.276964	0.294352	-0.940927	0.346742	1
LOC108695504	59.6588	-0.115624	0.44036	-0.262566	0.792885	1
LOC108695505	120.043	0.158453	0.248794	0.636884	0.524201	1		X
LOC108695506	29.0364	-0.341562	0.571653	-0.597499	0.550174	1
LOC108695507	1.84897	2.30197	2.48623	0.92589	0.354503	1
LOC108695509	62.6512	-0.0264535	0.432754	-0.0611283	0.951257	1
LOC108695511	64.7209	-0.0422834	0.357765	-0.118188	0.905919	1
LOC108695512	89.7682	0.0657323	0.304873	0.215605	0.829295	1
LOC108695513	12.2061	-1.2517	0.763872	-1.63862	0.101292	1
LOC108695514	1.51002	0.612531	2.21945	0.275983	0.782561	1
LOC108695515	141.07	0.023268	0.300477	0.0774368	0.938276	1
LOC108695517	90.9302	-0.195872	0.307514	-0.636953	0.524156	1
LOC108695518	183.064	0.108813	0.250093	0.435089	0.663498	1
LOC108695519	92.0534	0.568533	0.32013	1.77594	0.075742	1
LOC108695520	123.131	0.482235	0.283612	1.70033	0.0890682	1
LOC108695521	63.1648	-0.243685	0.402947	-0.604759	0.545339	1
LOC108695522	33.4132	0.353454	0.517594	0.68288	0.494683	1
LOC108695525	106.12	-0.0170146	0.302389	-0.0562671	0.955129	1
LOC108695526	95.2819	0.544873	0.361534	1.50711	0.131782	1
LOC108695527	467.048	0.142715	0.182018	0.784074	0.432997	1
LOC108695528	48.3933	0.301404	0.338188	0.891232	0.372805	1
LOC108695529	42.792	0.351798	0.525148	0.669902	0.50292	1
LOC108695530	14.3192	0.276917	0.770344	0.359472	0.719242	1
LOC108695532	67.44	0.0348062	0.298876	0.116457	0.90729	1
LOC108695533	7.89617	1.54472	1.00688	1.53417	0.124989	1
LOC108695534	10.0863	-1.03204	0.901319	-1.14503	0.252198	1
LOC108695535	105.595	-0.126739	0.273591	-0.463241	0.643192	1
LOC108695536	98.352	-0.0415215	0.319279	-0.130048	0.896528	1
LOC108695537	116.649	-0.0779062	0.251789	-0.309411	0.757009	1
LOC108695538	69.3725	0.316332	0.356989	0.886112	0.375557	1
LOC108695539	134.292	0.084571	0.260975	0.324057	0.745895	1
LOC108695540	16.8009	0.522698	0.69857	0.74824	0.454316	1
LOC108695541	25.2512	0.316279	0.553553	0.571363	0.567754	1
LOC108695543	15.1095	-0.600049	0.739711	-0.811194	0.417254	1
LOC108695544	48.934	-0.140763	0.432966	-0.325113	0.745095	1
LOC108695546	7.97243	-0.270274	1.03414	-0.261352	0.793821	1
LOC108695547	10.7293	-0.14652	0.949921	-0.154244	0.877417	1
LOC108695548	93.6324	-0.0231365	0.336075	-0.0688432	0.945114	1
LOC108695549	48.5121	-0.322186	0.594092	-0.542316	0.587601	1
LOC108695550	3.3685	-1.01672	1.42254	-0.714724	0.47478	1
LOC108695551	20.9067	0.200819	0.593137	0.338571	0.734933	1
LOC108695552	3.84459	0.828137	1.11404	0.743362	0.457262	1
LOC108695554	20.0614	0.087753	0.558375	0.157158	0.875121	1
LOC108695555	12.8581	-2.64884	1.12201	-2.3608	0.0182354	0.841003
LOC108695556	29.7096	0.0899233	0.450179	0.19975	0.841676	1
LOC108695557	44.5513	0.232119	0.482769	0.480808	0.630653	1
LOC108695559	14.6974	0.737702	1.09088	0.676246	0.498884	1
LOC108695560	2.75493	0.207475	1.55666	0.133282	0.89397	1
LOC108695561	59.4785	-0.0462712	0.414926	-0.111517	0.911207	1
LOC108695562	27.8123	0.733388	0.543282	1.34992	0.177041	1
LOC108695563	48.1769	0.0573125	0.469987	0.121945	0.902943	1
LOC108695564	30.4466	0.33333	0.504318	0.660952	0.508643	1
LOC108695565	32.8759	0.147713	0.597455	0.247237	0.804725	1
LOC108695567	29.1181	0.437396	0.541701	0.807449	0.419408	1
LOC108695568	177.543	0.0162712	0.218088	0.0746081	0.940527	1
LOC108695569	5.21711	1.58419	1.22725	1.29084	0.196759	1
LOC108695570	471.501	-0.00255944	0.146903	-0.0174226	0.986099	1
LOC108695571	3.5047	0.601215	1.47572	0.407405	0.68371	1
LOC108695573	8.01808	-0.868195	0.86829	-0.99989	0.317364	1
LOC108695574	182.958	0.600863	0.241727	2.48571	0.0129293	0.747346
LOC108695575	92.7296	0.3348	0.324086	1.03306	0.301577	1
LOC108695576	286.61	0.605562	0.225149	2.68961	0.00715359	0.65167
LOC108695577	110.776	0.216917	0.379211	0.572021	0.567308	1
LOC108695578	1.04852	-1.86832	3.4424	-0.542738	0.58731	1
LOC108695579	409.195	0.459939	0.271485	1.69416	0.0902347	1
LOC108695580	449.328	-0.299009	0.215835	-1.38536	0.165943	1
LOC108695581	1.04388	1.71738	2.88467	0.595348	0.551611	1
LOC108695582	956.865	0.00338933	0.158234	0.0214197	0.982911	1
LOC108695583	65.7811	0.457936	0.326231	1.40372	0.160403	1
LOC108695585	69.1143	0.630917	0.42686	1.47804	0.139396	1
LOC108695586	70.2125	0.309319	0.299089	1.0342	0.301042	1		X
LOC108695587	1.23745	1.71865	2.74811	0.625395	0.531712	1
LOC108695588	9.13831	-0.0373614	0.984046	-0.0379671	0.969714	1
LOC108695591	8.73406	0.566446	1.09876	0.515532	0.606181	1	X
LOC108695592	27.0569	-0.4832	0.489586	-0.986956	0.323664	1
LOC108695598	1.57253	0.577439	2.05891	0.280458	0.779126	1
LOC108695630	0.910251	0.854636	3.73148	0.229034	0.818842	1
LOC108695632	1.81119	-1.08229	2.33585	-0.46334	0.643121	1
LOC108695636	1.81616	-2.96848	2.39627	-1.23879	0.215423	1
LOC108695638	13.2993	0.277305	0.987924	0.280695	0.778945	1
LOC108695639	6.30166	-0.742073	1.12397	-0.660223	0.509111	1
LOC108695653	2.14111	0.501644	2.14783	0.233559	0.815328	1
LOC108695654	1.02223	-2.07586	3.09401	-0.670931	0.502265	1
LOC108695659	15.9212	-1.50127	0.682653	-2.19917	0.0278655	0.889965
LOC108695660	1.65484	-1.46482	2.3553	-0.621923	0.533992	1
LOC108695665	12.2885	-0.0717528	0.775931	-0.0924732	0.926322	1
LOC108695666	1.50482	-0.893719	2.81773	-0.317177	0.751109	1
LOC108695667	105.921	0.265079	0.35916	0.738052	0.460483	1
LOC108695668	38.8858	-0.173354	0.529744	-0.327241	0.743486	1		X
LOC108695669	38.4564	-0.596105	0.539316	-1.1053	0.269031	1
LOC108695671	1372.32	-0.0657164	0.115015	-0.571373	0.567747	1
LOC108695672	59.4128	0.963185	0.411994	2.33786	0.0193946	0.841003
LOC108695673	209.135	-0.433662	0.261935	-1.65561	0.0978012	1
LOC108695678	24.3968	-0.501323	0.848667	-0.590718	0.554709	1
LOC108695679	1470.6	-0.408207	0.12828	-3.18215	0.00146185	0.400431
LOC108695680	3.71444	0.219892	1.41325	0.155593	0.876354	1
LOC108695685	1.4076	1.64225	2.79353	0.587875	0.556616	1
LOC108695689	17.653	-0.0700951	0.6004	-0.116747	0.90706	1
LOC108695690	353.926	-0.0510638	0.190504	-0.268045	0.788664	1
LOC108695691	85.1109	0.207928	0.355611	0.584707	0.558745	1
LOC108695693	1.39565	-1.0689	2.7487	-0.388875	0.697369	1
LOC108695694	72.0517	-0.227839	0.373126	-0.610623	0.541449	1
LOC108695696	31.6135	-0.0082666	0.525983	-0.0157165	0.987461	1
LOC108695697	2.82307	0.0951573	1.77471	0.0536186	0.957239	1
LOC108695700	164.9	-0.30752	0.323925	-0.949355	0.34244	1	X
LOC108695703	89.8278	-0.466243	0.400021	-1.16555	0.243798	1
LOC108695704	2.37907	-0.935683	1.87309	-0.499539	0.6174	1
LOC108695711	11.8484	-1.33324	0.67008	-1.98967	0.0466273	0.978621
LOC108695735	507.235	-0.654022	0.153404	-4.2634	2.01e-05	0.0599161
LOC108695739	1.05961	-0.107116	3.04955	-0.0351252	0.97198	1
LOC108695740	508.264	-0.421369	0.146241	-2.88134	0.00395994	0.551558
LOC108695745	1.04147	-2.56434	2.58072	-0.993652	0.320392	1
LOC108695753	47.2745	-0.271746	0.390827	-0.695312	0.48686	1
LOC108695754	3.2644	-1.71756	1.5561	-1.10376	0.269699	1
LOC108695756	95.4676	0.0444511	0.291473	0.152505	0.878789	1
LOC108695757	872.043	-0.325507	0.152644	-2.13245	0.0329696	0.916935
LOC108695758	26.6577	0.474917	0.521391	0.910864	0.362367	1
LOC108695759	77.473	-0.0313298	0.421466	-0.0743352	0.940744	1
LOC108695761	116.444	-0.027442	0.257868	-0.106419	0.91525	1
LOC108695762	44.3601	-0.29038	1.32126	-0.219776	0.826046	1
LOC108695763	2.05838	-0.642315	2.01116	-0.319376	0.749442	1
LOC108695764	8.55684	0.424761	1.06377	0.399299	0.689673	1
LOC108695772	8.80162	4.02434	1.6013	2.51317	0.0119653	0.734592
LOC108695774	1185.13	0.245413	0.199867	1.22788	0.219493	1
LOC108695775	1.86096	-2.51402	2.17464	-1.15607	0.247654	1
LOC108695776	1.38907	3.68476	2.74956	1.34013	0.180205	1
LOC108695777	368.463	-0.381607	0.176059	-2.16749	0.0301973	0.900873
LOC108695781	121.867	-0.524327	0.253084	-2.07175	0.0382891	0.939067
LOC108695782	4.42793	-0.696196	1.25211	-0.556017	0.578199	1
LOC108695783	33.7202	0.453958	0.515509	0.880601	0.378534	1
LOC108695785	35.2152	-0.312	0.434981	-0.717272	0.473206	1
LOC108695787	360.575	-0.0661278	0.204719	-0.323018	0.746682	1		X
LOC108695788	1.167	0.854653	2.71278	0.315047	0.752726	1
LOC108695789	267.454	-0.118285	0.176616	-0.66973	0.50303	1
LOC108695795	129.635	-0.205916	0.253906	-0.810994	0.417369	1
LOC108695797	134.139	-0.290004	0.369977	-0.783843	0.433132	1
LOC108695798	2.3228	-2.91288	2.1733	-1.34031	0.180146	1
LOC108695799	24.2521	-0.256077	0.512826	-0.499345	0.617537	1
LOC108695803	7.90529	-0.0459249	1.3728	-0.0334534	0.973313	1
LOC108695804	119.945	0.226879	0.246041	0.922118	0.356467	1
LOC108695805	1.84275	-2.88402	2.13045	-1.35371	0.175827	1
LOC108695807	6.5819	-0.565084	0.910884	-0.620368	0.535015	1
LOC108695808	1.5201	0.276762	2.72139	0.101699	0.918996	1
LOC108695812	4.24856	-1.01413	1.3453	-0.753828	0.450953	1
LOC108695813	583.328	-0.0315234	0.151888	-0.207544	0.835585	1
LOC108695814	1655.65	-0.326749	0.160117	-2.04069	0.0412821	0.96038
LOC108695815	25.2401	-0.0189672	0.527603	-0.0359497	0.971322	1
LOC108695816	6.84843	-0.157672	1.08791	-0.144931	0.884765	1
LOC108695817	22.7539	-0.379787	0.605486	-0.627243	0.5305	1
LOC108695821	1.73476	2.27925	2.50367	0.910364	0.362631	1
LOC108695822	14.9564	-0.0277209	0.745461	-0.0371862	0.970337	1
LOC108695826	1.40495	1.7784	2.72414	0.652833	0.513864	1
LOC108695829	4.3175	0.773328	1.10437	0.700244	0.483775	1
LOC108695830	3.83392	5.4949	1.91108	2.87528	0.0040367	0.552301
LOC108695831	1.96901	3.20465	2.31774	1.38266	0.166769	1
LOC108695832	0.989438	0	3.10335	0	1	1
LOC108695833	7.15737	-0.113514	1.07272	-0.105818	0.915727	1
LOC108695837	7.56547	-1.02288	1.02744	-0.995563	0.319463	1
LOC108695839	1.63744	2.78163	2.372	1.17269	0.240918	1
LOC108695843	5.26684	0.856276	1.16569	0.734565	0.462604	1
LOC108695845	105.856	0.27036	1.43196	0.188805	0.850246	1
LOC108695846	1.4427	1.32188	2.75278	0.480198	0.631087	1
LOC108695859	1.03137	-1.06888	3.35221	-0.318859	0.749833	1
LOC108695860	1.15396	2.04265	3.09735	0.659484	0.509585	1
LOC108695861	5.52774	-2.3034	1.12341	-2.05036	0.0403289	0.953846
LOC108695864	1.05842	-1.06893	3.27959	-0.325933	0.744475	1
LOC108695879	0.972681	-0.910568	3.10802	-0.292973	0.769543	1
LOC108695884	1.04049	0	3.43083	0	1	1
LOC108695886	4.43974	1.0557	1.87671	0.562527	0.573757	1
LOC108695890	9.29397	-1.27759	1.28326	-0.995584	0.319452	1
LOC108695891	1.63002	-1.62937	2.26726	-0.718651	0.472356	1
LOC108695892	1.1809	-0.107109	3.24294	-0.0330283	0.973652	1
LOC108695894	49.2017	0.290539	0.426431	0.681328	0.495664	1
LOC108695895	5.34892	0.677903	1.31883	0.514019	0.607239	1
LOC108695899	4.93431	0.359684	1.22471	0.29369	0.768995	1
LOC108695901	443.855	-0.479608	0.188189	-2.54854	0.0108174	0.721806
LOC108695902	2.73091	-1.45922	1.98249	-0.736055	0.461698	1
LOC108695903	1.98454	3.01032	2.41102	1.24856	0.211824	1
LOC108695904	2.91363	0.803262	1.87828	0.427659	0.6689	1
LOC108695906	728.244	0.478277	0.408839	1.16984	0.242064	1
LOC108695907	1.40376	-1.87025	3.26901	-0.572115	0.567244	1
LOC108695912	894.605	-0.344919	0.147228	-2.34275	0.019142	0.841003
LOC108695919	3.17541	-2.45752	2.05532	-1.19568	0.23182	1
LOC108695920	1.24514	-1.49512	3.02187	-0.494767	0.620765	1
LOC108695921	1.4621	0.532743	2.44766	0.217654	0.827698	1
LOC108695922	2.42795	-0.250826	1.84386	-0.136033	0.891795	1
LOC108695923	1.22114	-1.06891	2.63972	-0.404932	0.685527	1
LOC108695931	41.4324	0.162754	0.612426	0.265753	0.79043	1
LOC108695940	1.66055	-3.33848	2.09098	-1.59661	0.110353	1
LOC108695944	2.69682	-1.85778	2.17776	-0.853067	0.393622	1
LOC108695949	4.1441	-1.06892	2.27483	-0.469891	0.638433	1
LOC108695950	1.31004	4.50793	3.12448	1.44278	0.149083	1
LOC108695955	1.7253	-1.88334	2.53992	-0.741496	0.458393	1
LOC108695959	2.07507	0.759713	2.50119	0.30374	0.761326	1
LOC108695960	1455.14	-0.430873	0.327973	-1.31374	0.188933	1
LOC108695961	149.62	0.139292	0.218164	0.638474	0.523165	1
LOC108695962	446.521	-0.220181	0.186847	-1.1784	0.238637	1
LOC108695965	706.584	-0.0805087	0.22135	-0.363717	0.716069	1
LOC108695967	5.24897	0.226667	1.22477	0.185069	0.853175	1
LOC108695968	1.58985	-1.73262	2.48208	-0.698052	0.485145	1
LOC108695974	1.90938	1.51628	1.98384	0.764317	0.444678	1
LOC108695976	4.1421	0.94985	1.70662	0.556567	0.577823	1
LOC108695982	3.69114	0.622739	1.20773	0.515629	0.606113	1
LOC108695983	188.52	0.108259	0.211367	0.512183	0.608523	1
LOC108695984	0.861752	3.29263	3.72439	0.884073	0.376657	1
LOC108695989	45.4897	-0.242791	0.433217	-0.560437	0.575182	1
LOC108695990	40.7015	0.617974	0.572626	1.07919	0.280502	1
LOC108695991	30.974	-0.501528	0.47619	-1.05321	0.292245	1
LOC108695992	17.1613	-0.606577	0.657299	-0.922833	0.356094	1
LOC108695993	4.92463	-0.547702	1.26697	-0.432294	0.665528	1
LOC108696000	4.09449	-5.05972	2.06911	-2.44536	0.0144708	0.783219
LOC108696003	5.16354	1.19067	1.15045	1.03496	0.300685	1
LOC108696004	1.34166	-0.843324	2.28934	-0.368369	0.712598	1
LOC108696005	3.35233	-0.886168	1.60277	-0.552896	0.580334	1
LOC108696007	32.6712	-0.502761	0.448161	-1.12183	0.261934	1
LOC108696008	2.40089	0.803552	1.55092	0.518112	0.60438	1
LOC108696012	321.625	0.0773809	0.172723	0.448006	0.654149	1
LOC108696013	66.149	0.101138	0.348451	0.29025	0.771625	1
LOC108696014	298.172	-0.245481	0.223743	-1.09716	0.272573	1
LOC108696016	380.835	-0.227705	0.183465	-1.24114	0.214554	1
LOC108696019	1.94463	-0.905249	2.22541	-0.406779	0.684171	1
LOC108696020	57.0056	-0.2866	0.363464	-0.788523	0.430391	1
LOC108696022	276.874	0.410694	0.223487	1.83766	0.066112	1		X
LOC108696023	8.83362	-1.09227	0.887304	-1.231	0.218324	1
LOC108696024	5.8854	0.300597	1.12258	0.267773	0.788874	1
LOC108696025	8.54351	1.57292	0.935991	1.68049	0.0928628	1
LOC108696027	1.00281	-1.57818	2.63636	-0.598619	0.549427	1
LOC108696028	1.16817	0.854634	3.27108	0.26127	0.793884	1
LOC108696029	6.34515	-0.344345	1.13691	-0.302877	0.761984	1
LOC108696035	6.98636	0.233006	1.14255	0.203934	0.838405	1
LOC108696037	2.04371	3.41568	2.33523	1.46268	0.143556	1
LOC108696040	1.32884	0.022511	2.37007	0.00949802	0.992422	1
LOC108696045	229.602	0.272617	0.286029	0.953109	0.340535	1
LOC108696047	6.38778	-0.892344	0.88499	-1.00831	0.313305	1
LOC108696053	9.4988	-1.49091	1.02128	-1.45985	0.144332	1
LOC108696054	3.89942	0.762422	1.50143	0.507796	0.611596	1
LOC108696056	6.74788	-0.89566	1.19376	-0.750282	0.453085	1
LOC108696057	48.8684	0.16267	0.426232	0.381647	0.702723	1
LOC108696061	53.8273	0.228128	0.358854	0.635712	0.524964	1
LOC108696065	7.5689	0.348038	1.12925	0.308203	0.757928	1
LOC108696066	41.2707	0.326672	0.39718	0.822478	0.410805	1
LOC108696067	67.783	-0.205889	0.375961	-0.547634	0.583943	1		X
LOC108696071	239.438	-0.105162	0.223133	-0.471296	0.637429	1
LOC108696073	8.53207	1.03041	0.946272	1.08891	0.276193	1
LOC108696074	985.838	0.0541432	0.155422	0.348362	0.727568	1
LOC108696075	111.408	-0.240792	0.281567	-0.855184	0.392449	1
LOC108696078	2508.32	-0.288541	0.138225	-2.08747	0.0368455	0.931837
LOC108696085	53.9707	-0.471769	0.418672	-1.12682	0.259818	1
LOC108696087	417.708	-0.559155	0.209913	-2.66375	0.00772745	0.653903
LOC108696088	2.25574	2.41223	1.8589	1.29767	0.194402	1
LOC108696090	2.77866	0.103224	1.47661	0.0699061	0.944268	1
LOC108696093	2.52773	0.857143	1.64006	0.52263	0.601232	1
LOC108696096	621.505	0.0797179	0.13374	0.596067	0.551131	1
LOC108696099	42.675	0.0907114	0.394394	0.230002	0.81809	1
LOC108696100	2.93386	0.573879	1.50152	0.3822	0.702313	1
LOC108696102	10.4495	0.0551683	1.00804	0.0547284	0.956355	1
LOC108696103	230.125	0.0619882	0.232689	0.266399	0.789932	1
LOC108696107	135.438	-0.216541	0.308228	-0.702533	0.482347	1
LOC108696109	210.418	-0.18891	0.244265	-0.773382	0.439296	1
LOC108696110	412.872	0.127071	0.205452	0.618494	0.536249	1		X
LOC108696111	251.539	0.0108387	0.185554	0.0584126	0.95342	1
LOC108696112	12.8446	-1.0619	0.866898	-1.22495	0.220596	1
LOC108696113	1.53277	2.10208	2.27052	0.925815	0.354542	1
LOC108696115	1.30954	0.407831	2.56943	0.158724	0.873886	1
LOC108696118	152.131	-0.193125	0.24499	-0.788299	0.430522	1
LOC108696120	17.3223	-0.945224	0.672646	-1.40523	0.159952	1
LOC108696123	1.23467	-0.502683	2.38877	-0.210436	0.833327	1
LOC108696134	489.869	-0.250746	0.147282	-1.70249	0.088664	1
LOC108696138	350.844	-0.114405	0.216532	-0.528354	0.597253	1
LOC108696140	10.058	-0.0106599	0.823754	-0.0129406	0.989675	1
LOC108696141	1.98002	-0.220324	1.65088	-0.133458	0.893831	1
LOC108696143	465.492	-0.121688	0.187856	-0.647773	0.517132	1
LOC108696145	268.254	-0.295321	0.224	-1.3184	0.187371	1
LOC108696147	6.22949	0.892898	1.19366	0.748031	0.454442	1
LOC108696153	1.09599	1.3298	2.7636	0.481184	0.630385	1
LOC108696154	4.04079	0.178404	1.69223	0.105426	0.916038	1
LOC108696160	769.033	-0.145167	0.132392	-1.09649	0.272862	1
LOC108696161	5.46084	-0.928576	1.21181	-0.76627	0.443516	1
LOC108696163	117.357	-0.271889	0.308896	-0.880195	0.378753	1
LOC108696164	24.674	1.17343	0.632725	1.85457	0.0636582	1
LOC108696165	3.07508	-1.09552	1.49705	-0.731782	0.464302	1
LOC108696166	416.169	-0.147447	0.446428	-0.330281	0.741188	1
LOC108696170	5.31696	1.13817	1.15249	0.987581	0.323358	1
LOC108696172	3.02049	2.80009	1.80938	1.54754	0.121732	1		X
LOC108696173	157.225	-0.265344	0.256557	-1.03425	0.301019	1
LOC108696174	26.3692	-0.113118	0.511597	-0.221107	0.825009	1
LOC108696176	59.3989	0.0810948	0.401932	0.201763	0.840102	1
LOC108696179	2.98742	-1.85799	1.65495	-1.12269	0.261569	1
LOC108696180	67.5385	-0.186917	0.354978	-0.526559	0.5985	1		X
LOC108696181	6.6352	-0.0662785	1.0055	-0.0659158	0.947445	1
LOC108696184	1168.63	0.0570395	0.144757	0.394035	0.693555	1
LOC108696188	1.73385	1.51933	2.50846	0.605681	0.544726	1
LOC108696191	81.0827	0.222139	0.320719	0.692627	0.488544	1
LOC108696194	189.756	0.0858346	0.243114	0.353063	0.724041	1
LOC108696196	192.448	-0.103154	0.216103	-0.477339	0.633121	1
LOC108696198	1.01748	-2.90926	2.8419	-1.0237	0.305976	1
LOC108696199	4.2091	0.599554	1.30425	0.459692	0.645737	1
LOC108696204	158.82	0.0427401	0.238866	0.178929	0.857993	1
LOC108696207	10.688	0.603657	0.915526	0.659355	0.509668	1	X
LOC108696208	22.0283	0.792989	0.55462	1.42979	0.152778	1
LOC108696209	7.49951	-1.26589	1.13353	-1.11676	0.264097	1
LOC108696210	34.8247	-0.241567	1.18595	-0.203691	0.838595	1
LOC108696211	31.3158	0.0388667	0.483687	0.080355	0.935955	1
LOC108696212	52.7268	0.229076	0.360367	0.635675	0.524988	1
LOC108696217	2.82088	0.973964	1.9922	0.488888	0.624921	1
LOC108696218	15.3609	0.878302	0.824467	1.0653	0.286741	1
LOC108696219	4.90436	-0.717483	1.18446	-0.605747	0.544682	1
LOC108696220	40.4322	-0.272107	0.612439	-0.444301	0.656825	1
LOC108696228	4.66124	-0.550769	1.323	-0.416304	0.677187	1
LOC108696235	1566.98	0.241063	0.110703	2.17756	0.0294386	0.896401
LOC108696237	281.898	-0.0623967	0.221389	-0.281842	0.778065	1
LOC108696238	12.1307	0.0993498	0.875037	0.113538	0.909604	1
LOC108696239	51.414	-0.48955	0.43311	-1.13031	0.258344	1
LOC108696241	152.403	-0.20604	0.242721	-0.848875	0.395951	1
LOC108696242	204.426	-0.098668	0.226368	-0.435874	0.662928	1
LOC108696243	22.3211	0.538502	0.525851	1.02406	0.305808	1
LOC108696244	34.9423	0.167369	0.505614	0.331022	0.740628	1
LOC108696248	1.3444	-0.218945	2.20629	-0.0992365	0.92095	1
LOC108696251	650.998	0.915756	0.400976	2.28382	0.0223822	0.860692
LOC108696253	601.923	-0.222893	0.161941	-1.37638	0.168704	1
LOC108696254	81.0348	0.335948	0.382476	0.87835	0.379754	1
LOC108696255	7.05254	-0.917488	0.914302	-1.00348	0.315627	1
LOC108696261	1.97448	-0.22211	1.67568	-0.132549	0.89455	1
LOC108696263	224.43	-0.252234	0.219598	-1.14862	0.250714	1	X
LOC108696264	112.714	0.119923	0.27385	0.437915	0.661448	1
LOC108696267	8.94448	-1.18024	0.9084	-1.29925	0.193858	1
LOC108696270	19.0427	0.47794	0.607341	0.786939	0.431318	1
LOC108696272	8.09036	-0.887402	0.932635	-0.9515	0.341351	1
LOC108696273	2.79477	-0.458122	1.62099	-0.282618	0.777469	1
LOC108696274	1.07354	-2.67589	3.34597	-0.799734	0.423865	1
LOC108696277	9.60629	1.03794	0.817917	1.26901	0.204438	1
LOC108696279	159.002	0.377765	0.248455	1.52045	0.128397	1
LOC108696281	17.6936	0.505105	0.94268	0.535818	0.592084	1
LOC108696284	7.82088	1.03465	1.30849	0.790724	0.429105	1
LOC108696285	1.69825	2.40758	2.3586	1.02076	0.307366	1
LOC108696293	10.3122	0.418261	0.891766	0.469025	0.639051	1
LOC108696296	93.4561	-0.157909	0.268179	-0.58882	0.555982	1
LOC108696297	1.80803	-3.33893	2.10523	-1.58602	0.112735	1
LOC108696298	2.91229	-0.657673	1.97213	-0.333483	0.738769	1
LOC108696299	5.52662	-1.00875	1.02771	-0.981551	0.326321	1
LOC108696300	122.768	-0.0452253	0.230371	-0.196315	0.844364	1
LOC108696301	3.03261	-1.23635	1.49029	-0.829603	0.406763	1
LOC108696302	1.48298	0	2.94075	0	1	1
LOC108696303	3.71621	-0.646529	1.28587	-0.502794	0.615109	1
LOC108696305	4.14014	-1.53542	1.28995	-1.19029	0.23393	1
LOC108696306	93.2532	0.313032	0.313581	0.998247	0.31816	1
LOC108696308	2577.97	0.0080542	0.11374	0.0708124	0.943547	1
LOC108696309	180.648	0.103206	0.219887	0.469361	0.638811	1
LOC108696310	3.15289	-0.521512	1.81172	-0.287855	0.773458	1
LOC108696311	11.4006	0.568317	0.878651	0.646806	0.517758	1
LOC108696313	30.7473	-0.489666	0.690395	-0.709254	0.478167	1
LOC108696315	177.697	0.413141	0.248677	1.66136	0.096642	1
LOC108696316	2.52457	0.98777	1.71478	0.576033	0.564593	1
LOC108696319	16.2911	-1.05287	0.848966	-1.24018	0.214907	1
LOC108696320	68.2334	-0.00352221	0.314438	-0.0112016	0.991063	1
LOC108696321	36.0479	-0.256479	0.433028	-0.592292	0.553655	1
LOC108696325	59.0949	-0.433469	0.528995	-0.819421	0.412547	1
LOC108696327	6.52492	-1.09258	0.990571	-1.10298	0.270036	1
LOC108696328	211.899	0.0915967	0.199761	0.458531	0.646571	1
LOC108696331	80.8553	0.202053	0.330332	0.611667	0.540758	1
LOC108696333	5.38389	1.04554	1.16544	0.897123	0.369653	1
LOC108696334	146.747	-0.0565776	0.220938	-0.256079	0.79789	1
LOC108696336	1.82164	1.82764	2.43524	0.750498	0.452955	1
LOC108696337	15.173	-0.0811375	0.871706	-0.093079	0.925841	1
LOC108696340	16.4431	0.784763	0.773912	1.01402	0.310573	1
LOC108696349	69.5798	-0.383617	0.370895	-1.0343	0.300995	1
LOC108696353	2.7993	-0.276921	1.52957	-0.181045	0.856332	1
LOC108696354	2.78501	-0.525546	1.86513	-0.281774	0.778117	1
LOC108696357	166.146	-0.0381338	0.259902	-0.146724	0.88335	1
LOC108696358	285.368	-0.154914	0.192575	-0.804435	0.421146	1
LOC108696359	161.338	-0.873233	0.270401	-3.2294	0.00124051	0.394235
LOC108696362	1.87956	-1.06891	2.2988	-0.464985	0.641942	1
LOC108696366	457.169	-0.188677	0.207985	-0.907166	0.364319	1
LOC108696368	276.112	0.242288	0.198302	1.22181	0.22178	1
LOC108696370	5.50564	0.106591	1.066	0.0999916	0.920351	1
LOC108696372	4.69223	-1.71401	1.22606	-1.39798	0.162119	1
LOC108696374	324.027	-0.170372	0.194891	-0.874193	0.382013	1
LOC108696377	437.528	0.120992	0.175083	0.691056	0.489531	1
LOC108696379	858.714	0.0709343	0.142488	0.497826	0.618607	1		X
LOC108696380	26.0719	-0.733104	0.5153	-1.42267	0.154831	1
LOC108696382	35.371	-0.472099	0.398465	-1.1848	0.236098	1
LOC108696383	1.18247	-0.609314	2.9939	-0.203519	0.83873	1
LOC108696384	19.616	0.0927509	0.571036	0.162426	0.870971	1
LOC108696387	1.42068	0.592683	2.48049	0.238937	0.811154	1
LOC108696388	6.41154	-0.48347	1.03509	-0.467081	0.640442	1
LOC108696390	1.52622	0	2.74911	0	1	1
LOC108696394	64.0573	0.341247	0.439211	0.776956	0.437185	1
LOC108696396	4.02525	1.3269	1.29579	1.02401	0.305831	1
LOC108696399	52.6425	-0.09443	0.440026	-0.214601	0.830079	1
LOC108696402	713.728	-0.428606	0.164457	-2.60618	0.00915571	0.695497
LOC108696403	173.313	-0.385885	0.217424	-1.7748	0.0759307	1
LOC108696405	135.301	-0.0470319	0.256823	-0.18313	0.854696	1
LOC108696406	1.15764	0.10709	3.34136	0.0320499	0.974432	1
LOC108696408	3.57291	0.61787	1.13708	0.543384	0.586866	1
LOC108696410	0.943259	2.04184	3.26193	0.62596	0.531341	1
LOC108696412	13.9598	0.08585	0.930522	0.09226	0.926491	1
LOC108696416	115.743	0.173172	0.284543	0.608595	0.542793	1		X
LOC108696417	51.2583	-0.0400642	0.408673	-0.0980348	0.921905	1
LOC108696418	59.7986	0.275303	0.344734	0.798597	0.424524	1
LOC108696419	50.2946	-0.0846142	0.404756	-0.20905	0.834409	1
LOC108696420	1.48162	-0.738537	2.38116	-0.310158	0.756441	1
LOC108696423	4.85709	-2.24874	1.19062	-1.88871	0.0589312	1
LOC108696425	604.143	-0.15196	0.184624	-0.823075	0.410466	1
LOC108696426	2.25785	-1.82686	2.00703	-0.910231	0.362701	1
LOC108696429	97.7652	-0.13753	0.30874	-0.445456	0.65599	1
LOC108696431	16.4807	-0.304211	0.68002	-0.447356	0.654618	1
LOC108696441	16.7313	0.586419	0.661913	0.885946	0.375647	1
LOC108696447	413.949	-0.307275	0.210418	-1.46031	0.144206	1
LOC108696448	131.621	-0.304488	0.266602	-1.14211	0.25341	1
LOC108696452	6.50263	-0.0895803	1.35198	-0.0662586	0.947172	1
LOC108696457	667.052	-0.0899895	0.21772	-0.413328	0.679367	1
LOC108696459	1033.47	0.00864855	0.140635	0.0614963	0.950964	1
LOC108696471	364.608	-0.162758	0.199211	-0.817016	0.41392	1
LOC108696472	1233.59	-0.163139	0.190909	-0.85454	0.392806	1
LOC108696474	14.4895	-1.23221	0.890688	-1.38343	0.166532	1
LOC108696475	3.92855	2.70867	1.56276	1.73326	0.0830491	1
LOC108696479	2.57321	0.687597	1.97545	0.34807	0.727787	1
LOC108696481	2.80935	0.400505	1.77233	0.225977	0.821219	1
LOC108696483	13.1029	0.380678	0.682743	0.557571	0.577138	1
LOC108696484	408.236	-0.0703359	0.183461	-0.383384	0.701435	1		X
LOC108696485	2.16185	-2.44235	2.00964	-1.21532	0.224244	1
LOC108696486	37.8119	-0.381002	0.461378	-0.825792	0.408922	1
LOC108696489	6.71347	-0.80445	1.14624	-0.701818	0.482793	1
LOC108696494	2.65916	0.443714	1.90356	0.233097	0.815686	1
LOC108696498	1.01321	-0.98352	2.64986	-0.37116	0.710519	1
LOC108696500	11.2742	-0.108692	0.682249	-0.159314	0.873421	1
LOC108696501	1.15471	0.388764	2.5585	0.15195	0.879227	1
LOC108696502	1.47859	-1.06892	2.78662	-0.383588	0.701284	1
LOC108696503	2.74234	1.76229	1.50203	1.17327	0.240687	1
LOC108696504	13.6082	-0.228607	0.766003	-0.298441	0.765366	1
LOC108696506	53.8825	0.157672	0.449491	0.350778	0.725755	1
LOC108696514	1.7693	2.36458	1.9618	1.20531	0.228082	1
LOC108696515	313.274	-0.328498	0.199153	-1.64947	0.099051	1
LOC108696519	36.0361	-0.0779008	0.475143	-0.163952	0.869769	1
LOC108696520	5.61427	-0.0572525	1.06657	-0.0536791	0.957191	1
LOC108696525	1622.81	-0.361342	0.147676	-2.44685	0.014411	0.782092
LOC108696527	1.68589	2.44035	2.45611	0.993584	0.320425	1
LOC108696529	227.48	-0.108745	0.211549	-0.514039	0.607225	1
LOC108696531	761.012	-0.203624	0.216083	-0.94234	0.346018	1
LOC108696532	1.63747	1.65467	2.13308	0.775721	0.437914	1
LOC108696533	2.11576	-0.727929	1.98693	-0.366359	0.714097	1
LOC108696537	26.4838	1.02128	0.600893	1.69961	0.0892044	1
LOC108696538	628.939	-0.218344	0.153309	-1.42421	0.154386	1
LOC108696539	18.5538	-0.23502	0.692757	-0.339253	0.734419	1
LOC108696540	302.718	-0.336823	0.235913	-1.42774	0.153366	1
LOC108696548	5.07481	0.776509	1.37955	0.56287	0.573523	1
LOC108696549	178.092	-0.0713183	0.246996	-0.288743	0.772778	1
LOC108696551	2.84166	0.202308	1.66332	0.121629	0.903193	1
LOC108696552	137.923	-0.0517229	0.235367	-0.219755	0.826062	1
LOC108696554	310.858	0.112619	0.213766	0.526835	0.598308	1
LOC108696555	173.842	-0.11329	0.212562	-0.532972	0.594053	1
LOC108696556	27.6982	0.41827	0.639464	0.654094	0.513051	1
LOC108696557	272.642	0.229589	0.206665	1.11092	0.266602	1
LOC108696560	228.389	0.109773	0.249478	0.440009	0.659931	1
LOC108696561	663.584	-0.179322	0.120146	-1.49254	0.135559	1
LOC108696562	1.65206	-0.472587	2.33086	-0.202752	0.839329	1
LOC108696563	221.2	0.432335	0.222901	1.93958	0.0524302	0.995876
LOC108696566	5.05313	0.0732761	1.47742	0.0495974	0.960443	1
LOC108696568	15.7244	-0.687606	0.697777	-0.985424	0.324416	1
LOC108696570	261.966	-0.106874	0.188283	-0.567625	0.570289	1
LOC108696575	1.30977	-2.05804	2.5866	-0.795655	0.426232	1
LOC108696576	1.21482	0.789637	2.9636	0.266445	0.789896	1
LOC108696581	78.1145	0.314694	0.344408	0.913723	0.360863	1
LOC108696584	35.1202	-0.346256	0.693512	-0.499278	0.617583	1
LOC108696586	2.53147	-0.132007	1.51322	-0.0872362	0.930484	1
LOC108696587	27.7651	-0.321591	0.505039	-0.636764	0.524278	1
LOC108696590	40.3594	0.356467	0.536786	0.664077	0.506641	1
LOC108696592	42.0889	-0.226797	0.561406	-0.40398	0.686227	1
LOC108696593	69.991	0.0812133	0.341926	0.237517	0.812256	1
LOC108696594	149.483	-0.306442	0.211849	-1.44651	0.148035	1
LOC108696606	5.64878	-1.08261	1.18761	-0.91159	0.361985	1
LOC108696608	2.45719	3.10141	2.10434	1.47381	0.140532	1
LOC108696610	536.814	-0.265467	0.158272	-1.67729	0.0934857	1
LOC108696613	102.823	0.211767	0.341747	0.61966	0.535482	1
LOC108696618	182.435	0.0946103	0.195887	0.482985	0.629106	1
LOC108696619	745.91	-0.0425873	0.158908	-0.268	0.788699	1
LOC108696620	285.085	-0.289478	0.209281	-1.3832	0.166603	1
LOC108696623	200.946	-0.206615	0.225657	-0.915612	0.35987	1
LOC108696628	7.44257	1.24861	1.05363	1.18506	0.235995	1
LOC108696629	81.6729	-0.339157	0.350484	-0.967683	0.333203	1
LOC108696632	1.11411	-3.12756	2.42506	-1.28968	0.197161	1
LOC108696634	1.11852	0.519832	2.91434	0.178371	0.858432	1
LOC108696636	224.17	-0.219397	0.213412	-1.02804	0.303929	1
LOC108696639	8.41687	-0.0807783	1.06348	-0.0759566	0.939454	1
LOC108696640	2.45322	2.3074	2.26644	1.01807	0.308643	1
LOC108696642	1.63197	2.08058	2.5732	0.808556	0.41877	1
LOC108696645	12.9869	-0.101751	0.685379	-0.148459	0.881981	1
LOC108696650	8.03804	-1.03337	1.31631	-0.78505	0.432424	1
LOC108696651	3.20185	-1.5353	1.56472	-0.981198	0.326495	1
LOC108696652	4.03649	0.614333	1.4235	0.431565	0.666057	1
LOC108696656	755.462	0.321093	0.179563	1.78819	0.0737449	1
LOC108696658	1.8143	0.876611	2.24115	0.391143	0.695692	1
LOC108696659	27.01	-0.158571	0.565541	-0.280388	0.77918	1
LOC108696660	12.1982	-0.058727	0.835262	-0.0703097	0.943947	1
LOC108696663	6.28274	1.74112	1.22456	1.42183	0.155075	1
LOC108696666	3.13455	1.35181	1.96975	0.686287	0.492532	1
LOC108696667	55.8675	0.528448	0.601646	0.878336	0.379761	1
LOC108696673	98.9	-0.192846	0.274962	-0.701356	0.483081	1
LOC108696676	1.90936	2.06755	2.10323	0.983032	0.325592	1
LOC108696677	30.9508	-0.681511	0.564852	-1.20653	0.227613	1
LOC108696681	4.94337	-1.05327	1.09363	-0.9631	0.335497	1
LOC108696683	77.6983	0.106583	0.347528	0.306689	0.75908	1
LOC108696684	1.48128	1.71854	2.75832	0.623039	0.533259	1		X
LOC108696685	1.32874	1.14804	2.83094	0.405532	0.685086	1
LOC108696688	1.6795	3.06359	2.41319	1.26952	0.204256	1
LOC108696689	359.078	0.0206679	0.215833	0.095759	0.923712	1
LOC108696690	6.69355	1.35095	1.20701	1.11925	0.263033	1
LOC108696692	1.70372	2.28301	2.04042	1.11889	0.263187	1
LOC108696695	110.449	-0.523716	0.298874	-1.7523	0.0797226	1
LOC108696697	26.2053	0.0337335	0.483235	0.0698075	0.944347	1
LOC108696698	4.17788	0.585992	1.52162	0.385112	0.700155	1
LOC108696704	10.4209	0.0693811	0.781079	0.0888272	0.929219	1
LOC108696707	0.966924	0	3.34294	0	1	1
LOC108696709	581.723	0.00388067	0.152435	0.0254578	0.97969	1
LOC108696712	2.25966	0.408897	2.13916	0.191148	0.84841	1
LOC108696713	247.244	-0.177228	0.207429	-0.854404	0.392881	1
LOC108696714	4.95204	0.424211	1.04154	0.40729	0.683795	1
LOC108696715	7.6534	-0.300364	1.07605	-0.279134	0.780142	1
LOC108696717	2.91539	-2.26135	1.58256	-1.42892	0.153028	1
LOC108696718	2.1559	0.724045	1.78957	0.404592	0.685778	1
LOC108696719	7.30172	1.1524	1.35974	0.847514	0.396709	1
LOC108696725	134.393	-0.0127092	0.332295	-0.0382468	0.969491	1
LOC108696729	55.8913	0.122378	0.352156	0.347511	0.728208	1		X
LOC108696730	69.0079	0.060747	0.317418	0.191379	0.848229	1
LOC108696736	2.08167	-0.266485	1.87002	-0.142504	0.886682	1
LOC108696737	3.25939	0.288734	1.38328	0.208732	0.834657	1
LOC108696741	94.2091	0.0166295	0.377813	0.0440152	0.964892	1
LOC108696742	40.3883	-0.498308	0.424454	-1.174	0.240396	1
LOC108696743	127.201	-0.412895	0.316103	-1.3062	0.191484	1
LOC108696744	32.5113	-0.321708	0.479262	-0.671256	0.502058	1
LOC108696748	1.02771	0	3.50269	0	1	1
LOC108696749	0.996689	-1.0689	3.55548	-0.300635	0.763693	1
LOC108696750	1.33642	0.73721	2.30187	0.320266	0.748767	1
LOC108696752	3.044	1.60912	1.59587	1.0083	0.313308	1
LOC108696757	3.09567	-0.554682	1.41443	-0.392159	0.694941	1
LOC108696758	309.076	-0.0897515	0.198437	-0.452293	0.651058	1
LOC108696759	1.734	0.280866	2.01708	0.139244	0.889258	1
LOC108696761	2.27385	0.445701	1.87248	0.238027	0.81186	1
LOC108696763	103.384	-0.0403104	0.321402	-0.12542	0.900191	1
LOC108696765	308.75	-0.290768	0.205934	-1.41195	0.157965	1
LOC108696771	267.973	-0.101394	0.245889	-0.412357	0.680078	1
LOC108696772	6.41919	0.425345	1.11299	0.382165	0.702339	1
LOC108696775	82.8757	0.0041876	0.336217	0.012455	0.990063	1
LOC108696776	313.593	0.0871164	0.198524	0.43882	0.660792	1
LOC108696777	248.959	-0.338452	0.190856	-1.77334	0.0761726	1
LOC108696778	454.752	-0.030414	0.175945	-0.172861	0.862761	1
LOC108696780	3.13116	0.471078	1.71629	0.274475	0.78372	1
LOC108696781	192.259	-0.0402369	0.242219	-0.166118	0.868064	1
LOC108696783	67.2838	0.72545	0.38461	1.8862	0.0592683	1	X
LOC108696784	170.734	0.466974	0.269539	1.73249	0.0831857	1
LOC108696785	6.73546	-2.40248	1.3384	-1.79505	0.0726465	1
LOC108696787	1074.75	-0.135617	0.141722	-0.95692	0.338608	1
LOC108696788	19.3068	0.881679	0.649281	1.35793	0.174486	1
LOC108696794	1.91249	-1.85572	1.97497	-0.939619	0.347413	1
LOC108696797	1.54325	0.731487	2.07598	0.352358	0.72457	1
LOC108696798	63.6879	0.0220787	0.351863	0.0627481	0.949967	1	X
LOC108696800	558.951	-0.0516168	0.175527	-0.294067	0.768706	1	X
LOC108696802	5.22886	0.729416	1.40261	0.520043	0.603034	1
LOC108696803	16.8093	0.79123	0.589603	1.34197	0.179605	1
LOC108696804	370.962	0.347114	0.33531	1.0352	0.300575	1
LOC108696805	314.65	-0.208344	0.169267	-1.23086	0.218374	1
LOC108696811	133.712	-1.3204	0.699582	-1.88741	0.0591054	1
LOC108696814	2.6521	-3.84044	2.34572	-1.63721	0.101586	1
LOC108696815	1.92294	-1.02569	2.3732	-0.432197	0.665598	1
LOC108696816	2.87462	-0.21215	1.94647	-0.108992	0.913209	1
LOC108696817	3.77647	-1.52607	1.71983	-0.887335	0.374899	1
LOC108696818	5.48413	-2.59923	1.60116	-1.62335	0.104515	1
LOC108696820	1.91332	0.84041	1.98056	0.42433	0.671326	1
LOC108696822	1.31111	0	3.14775	0	1	1
LOC108696824	1020.12	0.104828	0.145392	0.721004	0.470907	1
LOC108696825	2.42204	3.03585	1.78516	1.7006	0.0890182	1
LOC108696830	5.7403	-0.17301	1.15732	-0.149492	0.881166	1
LOC108696831	2.02634	-1.88643	2.43006	-0.776291	0.437577	1
LOC108696832	11.6916	-0.663882	0.697688	-0.951547	0.341327	1
LOC108696834	331.787	-0.053609	0.263853	-0.203177	0.838996	1
LOC108696836	362.586	-0.240203	0.277669	-0.86507	0.387001	1
LOC108696837	25.4348	0.544835	0.484191	1.12525	0.260484	1
LOC108696839	257.821	-0.0970134	0.191396	-0.506872	0.612245	1
LOC108696841	87.3187	0.254376	0.340571	0.74691	0.455118	1
LOC108696842	1.03406	-0.431357	2.82717	-0.152576	0.878733	1
LOC108696843	58.8026	0.216294	0.38281	0.565017	0.572063	1	X
LOC108696844	505.256	-0.125597	0.148597	-0.845216	0.39799	1
LOC108696845	11.2049	1.26252	0.839953	1.50309	0.132817	1
LOC108696846	45.2005	0.264134	0.422024	0.625874	0.531398	1
LOC108696848	758.055	-0.253944	0.169714	-1.49631	0.134573	1
LOC108696849	6.81713	-0.185707	1.18152	-0.157176	0.875106	1
LOC108696851	4.00878	-0.928226	1.54714	-0.599962	0.548532	1
LOC108696852	264.095	0.0996814	0.190483	0.523309	0.600759	1
LOC108696854	1.76282	2.27727	2.62994	0.865903	0.386543	1
LOC108696856	116.039	-0.433097	0.303633	-1.42639	0.153757	1
LOC108696860	1.50454	-0.323813	2.47678	-0.13074	0.895981	1
LOC108696862	162.932	-0.639614	0.303945	-2.10438	0.0353457	0.927033
LOC108696863	1742.37	-0.0587601	0.112951	-0.520225	0.602907	1
LOC108696864	41.2789	0.413138	0.485456	0.851032	0.394752	1
LOC108696865	6.23329	-0.223358	1.15929	-0.192668	0.847219	1
LOC108696873	993.584	0.192215	0.134253	1.43174	0.152218	1
LOC108696879	6.2239	0.380163	1.18936	0.319637	0.749244	1
LOC108696880	535.55	-0.327899	0.170819	-1.91957	0.0549122	0.995876		X
LOC108696881	8.26777	0.299831	0.84222	0.356	0.721841	1
LOC108696882	16.9785	1.13067	0.677437	1.66905	0.0951077	1
LOC108696883	3.459	-2.16462	1.50659	-1.43677	0.150785	1
LOC108696884	3.74849	1.25651	1.36914	0.917733	0.358758	1
LOC108696885	7.94079	-0.00562572	1.19378	-0.00471251	0.99624	1
LOC108696886	2.43757	0.219154	2.08977	0.10487	0.916479	1
LOC108696888	7.13251	1.20554	1.34805	0.894284	0.37117	1
LOC108696889	59.034	-0.8016	0.545862	-1.4685	0.141967	1
LOC108696890	20.389	-0.36897	0.72199	-0.511046	0.609319	1
LOC108696891	2.97672	2.30289	2.40286	0.958393	0.337865	1
LOC108696892	181.808	-0.192262	0.248277	-0.774386	0.438703	1
LOC108696893	3.30928	0.00842895	1.36681	0.00616688	0.99508	1
LOC108696895	289.137	-0.169068	0.191071	-0.884846	0.37624	1
LOC108696896	2.6263	-2.27978	2.10557	-1.08274	0.278925	1
LOC108696897	1.37368	-1.06164	2.54322	-0.417439	0.676357	1
LOC108696898	1.51862	0.735728	2.7373	0.268779	0.7881	1
LOC108696899	1.8662	-1.45936	1.92673	-0.757432	0.448791	1
LOC108696906	19.0092	0.130333	0.682809	0.190877	0.848622	1
LOC108696907	3.72761	-2.31855	1.65488	-1.40104	0.161202	1
LOC108696908	3.15618	-0.724793	1.5721	-0.461034	0.644774	1
LOC108696910	9.33778	-0.11932	0.872389	-0.136773	0.89121	1
LOC108696911	20.8591	0.368484	0.547557	0.67296	0.500973	1
LOC108696913	232.72	0.46336	0.286953	1.61476	0.106363	1
LOC108696914	4.08087	0.710743	1.56021	0.455545	0.648718	1
LOC108696916	12.4412	0.399775	1.11466	0.358651	0.719856	1
LOC108696919	2.83556	-0.255954	1.9938	-0.128375	0.897852	1
LOC108696921	2.02245	0	4.71159	0	1	1
LOC108696930	1.20979	-0.275587	3.0219	-0.0911966	0.927336	1
LOC108696932	1.39072	0	3.37161	0	1	1
LOC108696934	0.959012	0	3.05723	0	1	1
LOC108696936	23.7313	0.674945	0.644593	1.04709	0.295059	1
LOC108696940	120.777	0.0875676	0.287002	0.305111	0.760281	1
LOC108696942	4.90021	-1.80904	1.19447	-1.51451	0.129896	1
LOC108696943	2.89259	-0.699233	1.57958	-0.442671	0.658004	1
LOC108696944	274.542	-0.461699	0.760054	-0.607455	0.543549	1
LOC108696945	744.097	-0.0439579	0.503934	-0.0872295	0.930489	1
LOC108696947	48.4665	0.321063	0.3927	0.817577	0.413599	1
LOC108696948	11.0864	0.104998	0.840969	0.124854	0.900639	1
LOC108696952	4.05676	1.02376	1.7493	0.585238	0.558388	1
LOC108696958	3.50833	1.14351	1.29859	0.880582	0.378544	1
LOC108696959	4.5133	-0.406958	1.22839	-0.331294	0.740422	1
LOC108696961	89.3723	-0.0599341	0.317761	-0.188614	0.850396	1
LOC108696963	1.69214	-1.71499	2.35912	-0.726961	0.46725	1
LOC108696973	1.43474	-1.1053	2.80689	-0.393782	0.693742	1
LOC108696974	1.38522	2.85609	2.91973	0.978204	0.327974	1
LOC108696986	10.0559	0.356045	0.764135	0.465945	0.641255	1
LOC108696991	1.78657	-1.46901	2.27186	-0.646611	0.517884	1
LOC108696992	109.562	0.249059	0.246556	1.01015	0.312423	1
LOC108696993	1.6304	-0.554314	2.61809	-0.211724	0.832322	1
LOC108696996	6.6717	0.325508	0.916785	0.355054	0.722549	1
LOC108697000	81.489	0.0700786	0.339554	0.206385	0.836491	1
LOC108697001	1.59803	-3.46021	2.69502	-1.28393	0.199168	1
LOC108697002	1.35025	0.229349	2.37913	0.0964004	0.923203	1
LOC108697004	1.65221	1.69641	2.80345	0.605116	0.545102	1
LOC108697006	0.971372	1.86064	3.11497	0.597322	0.550293	1
LOC108697008	2.07127	-0.928208	2.31949	-0.400178	0.689026	1
LOC108697009	104.881	-0.108534	0.271703	-0.399456	0.689557	1
LOC108697013	2.05115	-1.43921	2.29308	-0.627632	0.530245	1
LOC108697017	1.36845	-1.06891	2.90838	-0.367527	0.713226	1
LOC108697022	221.533	0.137859	0.312381	0.441319	0.658982	1
LOC108697025	72.9815	0.231745	0.394063	0.588091	0.556471	1
LOC108697026	1.35595	0.755789	2.86406	0.263887	0.791867	1
LOC108697028	1.48078	-1.07124	2.0902	-0.512507	0.608296	1
LOC108697030	1.3125	2.30512	2.51997	0.914738	0.360329	1
LOC108697031	3.54889	1.99342	1.36637	1.45892	0.144586	1
LOC108697040	3.54058	1.20396	1.6496	0.729847	0.465483	1
LOC108697046	7.86471	-19.633	3.11867	-6.29531	NA	1
LOC108697047	108.517	0.161528	0.319616	0.505383	0.61329	1
LOC108697051	4.37019	-1.14578	1.2009	-0.954097	0.340035	1
LOC108697053	1.21529	-1.06891	3.29175	-0.324724	0.74539	1
LOC108697056	5.35504	1.78472	1.10722	1.61189	0.106986	1
LOC108697058	2.13306	-0.240603	1.80641	-0.133194	0.89404	1
LOC108697059	1.38987	0	3.41011	0	1	1
LOC108697060	7.85795	0.106808	0.923544	0.11565	0.90793	1
LOC108697068	2.63897	0.768422	1.75133	0.438765	0.660832	1
LOC108697069	1.1072	-2.59131	2.75086	-0.942	0.346193	1
LOC108697098	1.08279	-2.00876	2.86295	-0.701641	0.482903	1
LOC108697100	8.49267	-0.634797	0.76293	-0.832052	0.40538	1
LOC108697106	3.10383	-0.570697	2.3373	-0.244169	0.8071	1
LOC108697107	2.63274	-2.13235	1.82338	-1.16945	0.242224	1
LOC108697109	24.0444	-0.540869	0.600171	-0.901192	0.367486	1	X
LOC108697112	42.2469	0.900083	0.370955	2.42639	0.0152497	0.80278
LOC108697113	1.58995	-0.906746	2.79541	-0.324369	0.745658	1
LOC108697120	1.20422	0	3.55805	0	1	1
LOC108697125	2.10456	-0.580213	2.2246	-0.260818	0.794233	1
LOC108697127	728.767	0.233976	0.14013	1.66971	0.0949774	1
LOC108697129	14.072	0.21241	0.606159	0.350419	0.726024	1
LOC108697132	397.497	-0.0254558	0.162505	-0.156646	0.875524	1
LOC108697133	60.8011	-1.19002	0.554749	-2.14514	0.0319414	0.910965
LOC108697135	106.55	0.00486981	0.258736	0.0188216	0.984983	1
LOC108697141	9.36943	-0.32505	1.03651	-0.313601	0.753824	1
LOC108697142	182.989	-0.314713	0.221109	-1.42334	0.154637	1
LOC108697143	201.471	0.0306913	0.257419	0.119227	0.905095	1
LOC108697144	1.07166	0.635479	2.76801	0.229579	0.818419	1
LOC108697147	7.83787	0.71214	1.03915	0.685312	0.493147	1
LOC108697152	1.34476	0.0128819	2.59545	0.00496327	0.99604	1
LOC108697154	4.11613	0.211722	1.59219	0.132975	0.894213	1
LOC108697165	2.34309	1.72285	2.04957	0.840588	0.400579	1
LOC108697172	409.984	-0.338221	0.144598	-2.33905	0.0193331	0.841003
LOC108697173	20.2888	-0.216583	0.571651	-0.378872	0.704783	1
LOC108697174	377.306	-0.123276	0.193826	-0.636013	0.524768	1
LOC108697177	3.78078	-0.0814874	1.83575	-0.0443891	0.964594	1
LOC108697179	44.2193	-0.739796	0.494315	-1.49661	0.134495	1
LOC108697180	258.987	0.389139	0.201735	1.92896	0.0537352	0.995876
LOC108697186	349.206	-0.0391345	0.205105	-0.190803	0.84868	1
LOC108697189	2.23321	0.494786	1.76405	0.280484	0.779107	1
LOC108697190	4.24115	-1.51068	1.27915	-1.181	0.237603	1
LOC108697191	8.67473	1.9861	1.44185	1.37747	0.168368	1
LOC108697195	1.79292	-2.96806	2.33443	-1.27143	0.203576	1
LOC108697196	45.5924	0.198062	0.453039	0.437186	0.661977	1
LOC108697197	10.4572	-0.205843	0.87546	-0.235125	0.814111	1
LOC108697204	1.03808	-0.475141	2.81168	-0.168988	0.865806	1
LOC108697205	1.82688	-0.369641	2.25312	-0.164057	0.869686	1
LOC108697207	6.77869	-0.868364	1.17156	-0.741205	0.458569	1
LOC108697208	11.3388	-2.14899	0.81915	-2.62343	0.00870484	0.683186
LOC108697211	469.828	-0.131946	0.167614	-0.787198	0.431166	1
LOC108697212	262.467	-0.227035	0.204579	-1.10977	0.267099	1	X
LOC108697213	481.368	-0.247645	0.170897	-1.44909	0.147312	1
LOC108697214	6.13302	0.815668	1.01197	0.806017	0.420233	1
LOC108697215	7.81701	-0.396761	1.20353	-0.329665	0.741653	1
LOC108697216	58.7735	-0.165368	0.39812	-0.415373	0.677869	1
LOC108697217	493.865	-0.134098	0.162829	-0.82355	0.410195	1
LOC108697219	6.70602	-0.804908	1.0013	-0.80386	0.421478	1
LOC108697220	1.42976	0	3.04786	0	1	1
LOC108697221	1.71345	2.61231	2.12113	1.23157	0.218111	1
LOC108697222	43.0568	-0.490814	0.438593	-1.11906	0.263113	1
LOC108697223	9.85898	0.161023	0.776604	0.207343	0.835742	1
LOC108697224	194.989	0.222134	0.269289	0.824893	0.409432	1
LOC108697226	60.5234	0.116559	0.337728	0.345126	0.73	1
LOC108697227	49.4085	0.220971	0.361786	0.610777	0.541347	1		X
LOC108697228	5.14446	-1.79744	1.70681	-1.0531	0.292296	1
LOC108697229	293.469	-0.00807442	0.177755	-0.0454245	0.963769	1
LOC108697231	3.31771	-3.62948	1.89154	-1.9188	0.0550103	0.995876
LOC108697233	3.16912	2.74314	2.00795	1.36614	0.171896	1
LOC108697234	1.61354	-2.31832	2.23053	-1.03936	0.298638	1
LOC108697235	2.90913	-1.35401	1.77027	-0.764858	0.444356	1
LOC108697240	6.01917	0.305981	1.2083	0.253232	0.800089	1
LOC108697244	418.997	0.123251	0.189403	0.650735	0.515217	1		X
LOC108697246	3.15592	3.73683	1.94347	1.92276	0.0545105	0.995876
LOC108697247	4.65858	-2.41324	1.96778	-1.22638	0.220057	1
LOC108697248	1.60237	2.38609	2.49619	0.955894	0.339126	1
LOC108697250	295.187	-0.235074	0.196047	-1.19907	0.230501	1
LOC108697253	1.1606	-2.42502	3.54925	-0.683249	0.49445	1
LOC108697259	523.516	-0.194662	0.183786	-1.05918	0.289518	1
LOC108697260	18.9606	0.736437	0.626355	1.17575	0.239695	1
LOC108697261	45.1568	-0.260639	0.43431	-0.600122	0.548425	1
LOC108697262	6.05241	0.436078	1.05064	0.415058	0.6781	1
LOC108697263	526.808	0.72666	0.246463	2.94836	0.0031947	0.540676
LOC108697265	33.5874	-0.0925142	0.424565	-0.217903	0.827504	1
LOC108697266	134.223	-0.135766	0.241317	-0.562606	0.573703	1
LOC108697267	570.599	-0.205814	0.178209	-1.1549	0.24813	1
LOC108697268	5.56483	0.420443	1.39014	0.302447	0.762311	1
LOC108697272	778.448	-0.104592	0.418972	-0.249641	0.802865	1
LOC108697275	7.23467	1.17104	1.10955	1.05542	0.291234	1
LOC108697277	132.906	-0.181764	0.322315	-0.563934	0.572799	1
LOC108697281	60.8601	-0.207262	0.443112	-0.467742	0.639969	1
LOC108697282	10.8066	-0.0292195	0.745056	-0.0392178	0.968717	1		X
LOC108697287	337.053	-0.232708	0.195272	-1.19171	0.233376	1
LOC108697288	2.6183	-1.68056	1.78748	-0.940186	0.347122	1
LOC108697289	2.65644	-0.0346546	1.45866	-0.0237578	0.981046	1
LOC108697293	101.358	0.649693	0.819209	0.793073	0.427735	1
LOC108697295	6.2563	-3.03038	1.73624	-1.74536	0.0809214	1
LOC108697297	296.509	-0.55682	0.222313	-2.50467	0.0122567	0.738431
LOC108697299	3.83691	0.713281	1.37529	0.51864	0.604012	1
LOC108697300	29.8895	-0.52218	0.537449	-0.97159	0.331255	1
LOC108697302	2.06527	-1.39213	1.99675	-0.6972	0.485677	1
LOC108697305	4.65199	-1.70218	1.33434	-1.27567	0.202072	1
LOC108697306	1478.04	-0.243838	0.322561	-0.755944	0.449683	1
LOC108697307	85.4611	0.368828	0.293108	1.25833	0.208271	1
LOC108697308	2.9767	-0.612599	1.49948	-0.408542	0.682876	1
LOC108697309	119.131	-0.402753	0.294692	-1.36669	0.171721	1
LOC108697311	700.11	-0.287116	0.252511	-1.13705	0.255519	1
LOC108697312	242.815	-0.481979	0.259906	-1.85444	0.0636768	1		X
LOC108697317	128.622	-0.0775853	0.280183	-0.27691	0.781849	1
LOC108697318	32.6247	-1.26599	0.633314	-1.999	0.0456083	0.977614
LOC108697319	9.28815	2.05771	1.19157	1.7269	0.0841864	1
LOC108697320	11.0914	1.66436	1.00052	1.66349	0.0962145	1
LOC108697321	24.4005	-0.0305165	0.56171	-0.0543279	0.956674	1
LOC108697324	198.105	0.274299	0.263791	1.03983	0.298417	1
LOC108697325	40.6665	1.46809	0.576711	2.54563	0.010908	0.721806
LOC108697326	145.284	0.49863	0.310479	1.606	0.108274	1
LOC108697332	94.302	-0.241201	0.329356	-0.732342	0.46396	1
LOC108697336	308.317	-0.381993	0.216115	-1.76755	0.0771369	1
LOC108697341	3.57121	-0.0201518	1.44595	-0.0139367	0.98888	1
LOC108697342	1.17154	1.00481	2.18531	0.459802	0.645658	1
LOC108697344	41.5611	0.257071	0.420963	0.610674	0.541415	1
LOC108697345	2.48416	0.837518	1.44515	0.579538	0.562226	1
LOC108697348	1038.78	-0.16392	0.144487	-1.1345	0.256587	1
LOC108697351	1.87788	1.43965	1.8245	0.789061	0.430076	1
LOC108697352	3.09947	-3.81286	2.21228	-1.7235	0.0847979	1
LOC108697353	4.92372	-0.812543	1.32313	-0.614108	0.539144	1
LOC108697358	3.06232	1.01677	1.65204	0.615463	0.538249	1
LOC108697359	36.5914	-0.545181	0.452695	-1.2043	0.228473	1
LOC108697360	3.79285	0.719309	1.22949	0.585049	0.558515	1
LOC108697364	129.62	-0.0083865	0.260562	-0.0321862	0.974324	1
LOC108697367	41.6082	-0.363237	0.417544	-0.869937	0.384335	1
LOC108697383	0.980534	2.05204	3.52466	0.582195	0.560435	1
LOC108697386	497.133	-0.168207	0.215895	-0.779112	0.435914	1
LOC108697387	134.729	-0.116426	0.254811	-0.456909	0.647737	1
LOC108697388	138.483	-0.195566	0.24733	-0.790706	0.429115	1
LOC108697389	5.72072	0.335839	1.01475	0.330958	0.740676	1
LOC108697393	121.052	-0.337457	0.268453	-1.25704	0.208739	1
LOC108697397	68.261	-0.719495	0.35158	-2.04646	0.0407111	0.958856
LOC108697398	1.73687	0.1032	2.06372	0.0500069	0.960117	1
LOC108697399	721.419	-0.0791377	0.167575	-0.472253	0.636746	1
LOC108697400	68.4868	-0.597026	0.314328	-1.89937	0.0575159	1
LOC108697401	240.629	0.0653146	0.248855	0.26246	0.792966	1
LOC108697406	157.568	0.0894035	0.232038	0.385296	0.700018	1
LOC108697408	830.977	-0.012052	0.148664	-0.0810693	0.935387	1
LOC108697410	603.251	-0.184606	0.163623	-1.12824	0.25922	1
LOC108697411	3.12584	1.93006	1.79033	1.07805	0.281013	1
LOC108697415	2.53421	0.8016	1.86193	0.43052	0.666817	1
LOC108697416	226.03	-0.376298	0.177798	-2.11644	0.0343078	0.926025
LOC108697417	111.789	0.325941	0.288718	1.12893	0.258929	1
LOC108697420	663.528	0.202238	0.227714	0.888126	0.374473	1
LOC108697421	6.09359	4.68026	1.54477	3.02974	0.00244762	0.49381
LOC108697426	16.788	0.601732	0.643101	0.935673	0.349442	1
LOC108697429	2.71743	-1.23557	1.52896	-0.80811	0.419027	1
LOC108697430	88.2163	0.113586	0.289849	0.391881	0.695146	1
LOC108697431	31.2612	0.916766	0.585608	1.56549	0.117467	1
LOC108697433	13.4341	-1.6109	1.07279	-1.50159	0.133202	1
LOC108697434	130.981	-0.244353	0.267605	-0.913108	0.361186	1
LOC108697436	21.2223	0.386734	0.553889	0.698216	0.485042	1
LOC108697440	2.9441	0.490932	1.51939	0.323112	0.746611	1
LOC108697441	20.8073	0.0307647	0.63059	0.0487872	0.961089	1
LOC108697442	1.70864	1.07933	2.54555	0.424005	0.671562	1
LOC108697444	1680.36	-0.179555	0.141655	-1.26755	0.204957	1
LOC108697447	155.875	0.450732	0.220776	2.04158	0.0411931	0.960185
LOC108697450	2.34464	0	2.51495	0	1	1
LOC108697453	66.1528	-0.129856	0.307422	-0.422402	0.672732	1
LOC108697458	0.994961	-2.83851	3.25277	-0.872643	0.382858	1
LOC108697459	2.09464	0	2.73356	0	1	1
LOC108697460	18.0708	-0.618933	1.01956	-0.60706	0.543811	1
LOC108697462	60.3456	0.476156	0.367237	1.29659	0.194772	1
LOC108697463	180.06	-0.303709	0.291019	-1.04361	0.296668	1
LOC108697464	0.987664	0.298228	2.57305	0.115904	0.907729	1
LOC108697466	315.026	-0.0109951	0.206904	-0.0531411	0.957619	1
LOC108697467	118.753	-0.0302218	0.289495	-0.104395	0.916856	1
LOC108697468	1.70737	-0.181355	2.31397	-0.078374	0.937531	1
LOC108697469	222.678	-0.384195	0.234052	-1.64149	0.100695	1		X
LOC108697471	266.895	-0.23089	0.288006	-0.801683	0.422736	1
LOC108697472	284.55	-0.147257	0.167408	-0.87963	0.37906	1
LOC108697475	79.5321	-0.0270864	0.294287	-0.0920406	0.926666	1
LOC108697476	126.016	0.0458768	0.322462	0.14227	0.886866	1
LOC108697479	4.43654	-0.0542367	1.61352	-0.0336139	0.973185	1
LOC108697481	1.16074	0	3.19322	0	1	1
LOC108697488	7.53948	-1.06246	0.932664	-1.13917	0.254632	1
LOC108697489	1.21863	0.0211466	2.96922	0.00712194	0.994318	1
LOC108697491	30.711	1.04803	0.702473	1.49192	0.135721	1
LOC108697493	52.1275	-0.0943367	0.439588	-0.214603	0.830077	1
LOC108697494	19.6422	0.854551	0.746683	1.14446	0.252432	1
LOC108697495	1.10225	0.854627	3.66846	0.232966	0.815787	1
LOC108697500	2.09012	2.14434	2.08202	1.02993	0.303043	1
LOC108697502	4.79803	0.450504	1.02637	0.438929	0.660713	1
LOC108697503	1.78235	-2.55747	2.15295	-1.18789	0.234876	1
LOC108697504	261.083	-0.188937	0.233147	-0.810378	0.417723	1
LOC108697505	30.504	-0.0625207	0.526593	-0.118727	0.905492	1
LOC108697507	6.05291	-0.0430177	1.08156	-0.0397737	0.968274	1
LOC108697508	20.7787	-0.0987524	0.531312	-0.185865	0.852551	1
LOC108697509	11.9431	0.183065	0.890833	0.205498	0.837183	1
LOC108697512	25.7125	-0.469107	0.486572	-0.964106	0.334993	1
LOC108697521	49.4603	0.679094	0.529001	1.28373	0.199237	1
LOC108697523	2.06229	1.70094	1.87896	0.905258	0.365329	1
LOC108697525	41.3963	0.053272	0.477814	0.111491	0.911227	1
LOC108697528	4.32813	-0.337546	1.14167	-0.295659	0.767491	1
LOC108697529	7.83545	-0.309581	1.04742	-0.295565	0.767562	1
LOC108697530	5.53745	2.34468	1.72309	1.36074	0.173595	1
LOC108697531	1.97982	-2.05321	2.49017	-0.824527	0.40964	1
LOC108697535	32.1392	-0.48113	0.605629	-0.794429	0.426946	1
LOC108697536	748.686	0.129614	0.153689	0.843349	0.399033	1
LOC108697537	19.2845	-0.447407	0.646453	-0.692095	0.488878	1
LOC108697538	173.984	0.0547467	0.237111	0.230891	0.817399	1
LOC108697539	293.471	0.209799	0.20569	1.01998	0.307738	1
LOC108697541	0.948322	-2.30572	3.00739	-0.766686	0.443268	1
LOC108697542	3894.12	0.0439784	0.116978	0.375955	0.70695	1
LOC108697544	1024.23	-0.0483097	0.191832	-0.251834	0.80117	1
LOC108697547	498.493	-0.259916	0.137505	-1.89024	0.058726	1
LOC108697548	14.0588	-0.400194	0.815533	-0.490715	0.623628	1
LOC108697549	12.4432	0.307493	1.0509	0.2926	0.769828	1
LOC108697552	7.7514	-0.160491	1.36534	-0.117547	0.906427	1
LOC108697553	5.06673	0.512346	1.20436	0.42541	0.670538	1
LOC108697557	454.101	-0.11169	0.169512	-0.658893	0.509964	1
LOC108697558	4.0491	-1.00857	1.21806	-0.828015	0.407662	1
LOC108697559	34.4318	-0.269309	0.614247	-0.438438	0.661069	1
LOC108697560	149.676	0.0351973	0.286251	0.12296	0.902139	1
LOC108697562	9.57095	-0.609613	0.819977	-0.743452	0.457208	1
LOC108697563	31.6272	-0.47686	0.498076	-0.957404	0.338364	1
LOC108697564	45.1966	0.0402127	0.410175	0.0980378	0.921902	1
LOC108697565	6.35509	-0.387693	0.981029	-0.39519	0.692703	1
LOC108697566	2.96579	0	4.22216	0	1	1
LOC108697567	5.05821	0.555582	1.20429	0.461338	0.644556	1
LOC108697571	1015.14	-0.282786	0.147581	-1.91614	0.0553474	0.995876
LOC108697577	1.45184	-2.4291	3.23608	-0.750629	0.452876	1
LOC108697579	204.161	0.158703	0.223588	0.709802	0.477827	1
LOC108697580	2.37748	0.809636	1.84627	0.438526	0.661005	1
LOC108697581	3.24708	3.0216	2.03983	1.4813	0.138527	1
LOC108697585	42.0305	0.0647778	0.457001	0.141745	0.887281	1
LOC108697589	12.8702	0.41825	0.858104	0.487411	0.625967	1
LOC108697591	69.5783	-0.641088	0.349046	-1.83669	0.0662561	1
LOC108697597	26.2256	0.159957	0.638834	0.250389	0.802287	1
LOC108697599	91.7158	0.0183472	1.04696	0.0175243	0.986018	1
LOC108697600	19.957	-0.929883	0.587522	-1.58272	0.113485	1
LOC108697603	313.657	-0.0469781	0.205448	-0.228661	0.819132	1
LOC108697606	3.65632	-1.00884	1.8181	-0.554884	0.578974	1
LOC108697608	37.907	0.168843	0.559174	0.30195	0.76269	1
LOC108697610	105.39	0.0665292	0.306417	0.21712	0.828115	1
LOC108697611	2.61065	-0.78192	1.77162	-0.44136	0.658953	1
LOC108697612	1.01651	-1.8418	3.0345	-0.606954	0.543881	1
LOC108697613	1.78778	-1.83258	2.41681	-0.758261	0.448295	1
LOC108697619	749.455	-0.413308	0.19068	-2.16755	0.0301931	0.900873
LOC108697620	5.37383	-3.32988	1.69898	-1.95992	0.0500049	0.986468
LOC108697621	342.102	-0.104185	0.190968	-0.545562	0.585367	1
LOC108697627	5.2053	-1.74168	1.49872	-1.16211	0.245189	1
LOC108697630	440.7	-0.0967248	0.189776	-0.509678	0.610277	1
LOC108697634	48.1855	-0.345395	0.438868	-0.787012	0.431275	1
LOC108697635	2.05735	-0.437849	1.51614	-0.288793	0.77274	1
LOC108697640	448.1	-0.0540283	0.161117	-0.335335	0.737372	1
LOC108697641	361.305	-0.122458	0.197674	-0.619493	0.535592	1
LOC108697646	45.1826	-0.0613304	0.525148	-0.116787	0.907029	1
LOC108697648	77.4433	-0.0317475	0.341116	-0.0930696	0.925848	1
LOC108697649	93.081	0.251228	0.342014	0.734554	0.462611	1
LOC108697652	1.65051	-1.06891	2.71561	-0.393616	0.693864	1
LOC108697654	47.2942	0.414193	0.375201	1.10392	0.269626	1
LOC108697655	151.573	-0.0611298	0.248944	-0.245557	0.806025	1
LOC108697657	20.7677	2.38849	0.857764	2.78455	0.00536014	0.607862
LOC108697658	3.72454	-1.18812	1.44981	-0.819499	0.412502	1
LOC108697659	17.3076	0.663648	0.724453	0.916068	0.359631	1
LOC108697661	182.95	0.303105	0.223998	1.35316	0.176005	1
LOC108697662	2.19645	-1.46859	2.27977	-0.644183	0.519457	1
LOC108697665	11.9017	-1.296	0.92943	-1.3944	0.163196	1
LOC108697666	14.4049	-0.166242	0.719384	-0.23109	0.817245	1
LOC108697669	37.4094	0.248239	0.576905	0.430294	0.666981	1
LOC108697670	923.455	0.146844	0.163843	0.89625	0.370119	1
LOC108697678	110.213	0.293519	0.310226	0.946145	0.344075	1
LOC108697679	2.66635	0.876625	1.63224	0.537069	0.59122	1
LOC108697683	160.095	-0.28481	0.237653	-1.19842	0.230752	1	X
LOC108697686	4.74644	-0.324424	1.05277	-0.308163	0.757958	1
LOC108697687	243.534	-0.171838	0.227294	-0.756017	0.449639	1
LOC108697692	102.242	0.143416	0.364476	0.393484	0.693962	1		X
LOC108697695	46.5527	0.210163	0.401569	0.523355	0.600728	1
LOC108697697	1.42279	-0.951707	1.97114	-0.482821	0.629223	1
LOC108697699	48.4693	-0.104175	0.533481	-0.195273	0.845179	1
LOC108697700	26.0205	0.401261	0.568669	0.705613	0.480429	1
LOC108697701	3.5925	0.297646	1.29297	0.230204	0.817933	1
LOC108697702	217.025	-0.190533	0.202395	-0.941388	0.346506	1
LOC108697703	31.8285	-0.179346	0.54737	-0.32765	0.743176	1
LOC108697705	17.6351	0.051411	0.625334	0.0822136	0.934477	1
LOC108697709	3.10498	0.0241436	1.45519	0.0165913	0.986763	1
LOC108697710	57.6217	-0.625299	0.379684	-1.64689	0.0995802	1
LOC108697712	38.1416	0.325065	0.397498	0.817778	0.413484	1
LOC108697713	156.902	-0.179117	0.207875	-0.861658	0.388876	1
LOC108697714	1023.88	-0.126116	0.17475	-0.721694	0.470483	1
LOC108697715	11.4323	0.545612	0.940188	0.580323	0.561697	1
LOC108697718	1.46233	1.61947	1.99797	0.810561	0.417618	1
LOC108697719	2.25842	-1.069	4.50838	-0.237115	0.812567	1
LOC108697722	246.744	-0.189978	0.217417	-0.873795	0.38223	1
LOC108697723	74.9555	0.230387	0.332734	0.692406	0.488682	1
LOC108697724	209.252	0.100924	0.21697	0.465155	0.641821	1
LOC108697726	38.4856	0.153695	0.384639	0.399582	0.689465	1
LOC108697729	402.052	-0.223756	0.199749	-1.12019	0.262634	1	X
LOC108697731	6.09125	0.290064	1.43804	0.201708	0.840145	1
LOC108697732	61.1522	0.192815	0.396689	0.486062	0.626923	1
LOC108697733	193.121	-0.422201	0.209147	-2.01869	0.0435199	0.965277
LOC108697734	48.3976	-0.25429	0.42823	-0.593815	0.552636	1
LOC108697737	63.808	0.209833	0.393191	0.533667	0.593572	1
LOC108697738	23.6138	-0.447693	0.511233	-0.875712	0.381187	1
LOC108697739	21.4154	0.363416	0.675061	0.538345	0.590339	1
LOC108697749	41.7617	0.0840263	0.503545	0.16687	0.867473	1
LOC108697754	3.7507	-0.355352	1.33683	-0.265816	0.790381	1
LOC108697757	56.6335	0.134646	0.361844	0.372109	0.709811	1	X
LOC108697759	43.5361	-0.160729	0.391598	-0.410444	0.68148	1
LOC108697760	9589.18	-0.138426	0.0988299	-1.40065	0.161319	1
LOC108697765	430.487	-0.238496	0.201077	-1.18609	0.235587	1
LOC108697770	247.969	0.114941	0.189716	0.605858	0.544609	1
LOC108697771	64.1953	0.482918	0.343628	1.40535	0.159917	1
LOC108697772	1.34082	1.32596	2.44246	0.542877	0.587215	1
LOC108697773	802.548	-0.0385227	0.162323	-0.237321	0.812408	1
LOC108697778	82.3791	0.367626	0.277762	1.32353	0.18566	1
LOC108697779	108.077	-0.166665	0.365199	-0.456367	0.648126	1		X
LOC108697781	20.9693	-0.32928	1.16837	-0.281828	0.778076	1
LOC108697783	20.5881	0.132484	0.632278	0.209534	0.834032	1
LOC108697787	0.968321	0.854622	3.71272	0.230187	0.817946	1
LOC108697789	67.6384	0.00943475	0.373729	0.0252449	0.97986	1
LOC108697790	1.43632	-0.619404	2.19099	-0.282706	0.777403	1
LOC108697791	3.97524	0.132065	1.16623	0.113241	0.90984	1
LOC108697792	572.914	0.198728	0.155247	1.28007	0.20052	1
LOC108697796	13.7585	-0.275613	0.910538	-0.302692	0.762124	1
LOC108697797	12.2349	-0.48343	0.85388	-0.566157	0.571287	1
LOC108697800	2.88125	-1.04809	1.8609	-0.563217	0.573287	1
LOC108697803	22.7082	-0.166007	0.651247	-0.254906	0.798795	1
LOC108697807	2.29508	-0.810222	2.08074	-0.389391	0.696987	1
LOC108697808	431.506	-0.0796368	0.162895	-0.488883	0.624924	1
LOC108697814	119.628	0.0957346	0.332264	0.288128	0.773249	1
LOC108697815	818.161	-0.227298	0.136772	-1.66188	0.0965371	1
LOC108697819	1.62714	-2.8283	2.62424	-1.07776	0.281141	1
LOC108697823	21.0698	-1.33192	0.63148	-2.10921	0.0349269	0.927033
LOC108697824	68.7624	-0.336134	0.329441	-1.02032	0.307578	1
LOC108697825	93.8626	0.256574	0.316457	0.81077	0.417498	1	X
LOC108697826	3.19522	-0.640676	1.84039	-0.348119	0.72775	1
LOC108697827	37.3142	-0.380546	0.513525	-0.741046	0.458666	1
LOC108697828	1.3783	1.70714	2.81502	0.606439	0.544223	1
LOC108697830	4.60961	-0.454622	1.27251	-0.357263	0.720895	1
LOC108697833	44.5498	0.677263	0.499446	1.35603	0.175091	1
LOC108697837	7.81574	-0.0350242	0.918947	-0.0381134	0.969597	1
LOC108697839	268.864	0.291708	0.216517	1.34727	0.177892	1
LOC108697840	183.312	0.0959853	0.312944	0.306717	0.759059	1
LOC108697842	2.91412	-0.639211	1.73241	-0.368972	0.712149	1
LOC108697848	19.1382	0.142363	0.590159	0.241229	0.809378	1
LOC108697853	190.873	0.128647	0.213581	0.602331	0.546954	1
LOC108697854	63.0503	0.122746	0.333802	0.367721	0.713081	1
LOC108697855	160.895	-0.243496	0.326365	-0.746084	0.455617	1
LOC108697856	917.183	-0.200804	0.183235	-1.09588	0.273131	1
LOC108697859	19.2391	1.00093	0.618342	1.61874	0.105504	1
LOC108697860	317.723	-0.140757	0.220863	-0.637304	0.523927	1
LOC108697862	21.5948	-0.363482	0.657592	-0.552747	0.580437	1
LOC108697863	61.4979	0.0912999	0.360425	0.253312	0.800027	1	X
LOC108697865	100.489	0.385228	0.326966	1.17819	0.238722	1
LOC108697866	2.12574	2.21949	2.05392	1.08061	0.27987	1
LOC108697867	3.35431	0.768589	1.44745	0.530995	0.595422	1
LOC108697869	24.7279	-0.305502	0.704123	-0.433876	0.664379	1
LOC108697870	1518.42	-0.272811	0.202689	-1.34596	0.178317	1
LOC108697873	11.8471	0.619691	0.706591	0.877014	0.380479	1
LOC108697874	20.3104	0.569842	0.595	0.957717	0.338205	1
LOC108697876	817.291	0.00545449	0.157151	0.0347085	0.972312	1
LOC108697877	4.44264	1.83709	1.36013	1.35068	0.176799	1
LOC108697881	1.30884	-0.430002	2.65719	-0.161826	0.871443	1
LOC108697882	1.4946	-3.68131	2.75899	-1.3343	0.182107	1
LOC108697883	16.5045	-0.565815	0.715362	-0.790949	0.428974	1
LOC108697885	10.3263	0.589681	0.835778	0.705547	0.48047	1
LOC108697886	608.888	-0.107305	0.177035	-0.606124	0.544432	1
LOC108697887	2685.17	0.0705637	0.150439	0.469053	0.639032	1
LOC108697888	244.007	0.0440838	0.183552	0.240171	0.810198	1
LOC108697889	4.87847	-1.70126	1.88428	-0.902872	0.366594	1
LOC108697890	8.52766	-0.780518	1.00252	-0.778558	0.43624	1
LOC108697891	2.55903	-0.305844	1.64876	-0.185499	0.852837	1
LOC108697894	40.1018	-0.193765	0.758617	-0.255419	0.7984	1
LOC108697895	2.23262	1.04156	1.82728	0.570007	0.568673	1
LOC108697897	54.269	-0.00247227	0.40322	-0.00613132	0.995108	1
LOC108697900	4.75325	0.627302	1.36556	0.459374	0.645965	1
LOC108697901	178.799	0.182607	0.243348	0.750395	0.453017	1
LOC108697903	196.177	0.394726	0.333056	1.18516	0.235952	1
LOC108697904	429.217	0.107727	0.159979	0.673381	0.500705	1		X
LOC108697905	206.051	0.151464	0.194407	0.779108	0.435916	1
LOC108697912	3.55142	1.06168	1.74396	0.608777	0.542672	1
LOC108697919	52.7597	0.270025	0.387421	0.696982	0.485814	1
LOC108697920	5.91028	0.621799	1.07548	0.578162	0.563155	1
LOC108697921	4.06029	-0.24241	1.36839	-0.17715	0.85939	1
LOC108697922	2.12254	-0.0758584	2.30592	-0.0328972	0.973757	1
LOC108697923	7.63976	0.443063	0.910726	0.486494	0.626617	1
LOC108697924	1.09032	1.71556	3.12286	0.549354	0.582763	1
LOC108697926	17.4774	0.90476	0.773737	1.16934	0.242268	1
LOC108697928	13.9233	0.898161	0.782443	1.14789	0.251013	1
LOC108697932	18.8295	0.683182	0.654125	1.04442	0.296291	1
LOC108697934	3.90856	-3.53737	1.5108	-2.34138	0.0192124	0.841003
LOC108697935	3.05592	-0.109413	1.29141	-0.084724	0.932481	1
LOC108697936	5.6971	-0.79683	1.04624	-0.76161	0.446293	1
LOC108697943	1.8403	-3.65604	2.13439	-1.71293	0.0867262	1
LOC108697946	7.30603	0.14504	1.01447	0.142971	0.886313	1
LOC108697947	22.9748	-0.21203	0.509609	-0.416063	0.677364	1
LOC108697950	1.00467	3.11311	3.00495	1.03599	0.300205	1
LOC108697951	4.68644	0.65639	1.17042	0.560815	0.574924	1
LOC108697952	1.1478	0	3.18097	0	1	1
LOC108697953	6.72002	-1.6185	1.19978	-1.34899	0.17734	1
LOC108697954	42.1093	-0.162281	0.395854	-0.409952	0.681841	1
LOC108697955	60.6913	0.841668	0.379653	2.21694	0.0266272	0.889732
LOC108697962	5.39768	-0.0474242	1.41259	-0.0335724	0.973218	1
LOC108697964	56.3322	0.267625	0.383125	0.698531	0.484845	1
LOC108697966	1.56617	-3.25301	2.15579	-1.50896	0.131308	1
LOC108697968	0.952349	-2.29975	3.53628	-0.65033	0.515479	1
LOC108697982	3.33429	0.440482	1.67502	0.262972	0.792572	1
LOC108697988	87.9824	-0.184066	0.303674	-0.606129	0.544429	1	X
LOC108697991	16.0603	-0.431547	0.65011	-0.663806	0.506814	1
LOC108697992	3.51707	2.82748	1.86398	1.51691	0.129291	1
LOC108697994	1.29208	-1.61229	2.5321	-0.636741	0.524293	1
LOC108698000	1.75993	-1.06891	2.78251	-0.384153	0.700865	1
LOC108698019	361.992	-0.280678	0.17911	-1.56707	0.117098	1
LOC108698020	2.0072	-0.407424	1.7967	-0.226762	0.820608	1
LOC108698025	83.1387	-0.0409864	0.382645	-0.107113	0.914699	1
LOC108698033	55.678	0.0299191	0.507087	0.0590019	0.952951	1
LOC108698034	1.76881	2.2611	2.26551	0.998054	0.318253	1
LOC108698037	164.122	-0.0188805	0.236236	-0.0799221	0.936299	1
LOC108698038	2.74543	1.23414	1.98251	0.622512	0.533605	1
LOC108698040	65.2015	0.204556	0.433936	0.471396	0.637358	1
LOC108698044	2.38919	3.29619	2.53916	1.29814	0.194238	1
LOC108698045	9.69859	-0.193702	0.908966	-0.213101	0.831248	1
LOC108698046	1.2387	-1.06901	2.75085	-0.388611	0.697564	1
LOC108698048	466.557	0.238772	0.172803	1.38176	0.167047	1
LOC108698051	760.713	-0.197677	0.167166	-1.18252	0.237	1
LOC108698053	166.564	-0.0108499	0.277728	-0.0390666	0.968837	1
LOC108698062	255.791	-0.516958	0.218529	-2.36563	0.0179996	0.841003
LOC108698063	6.14497	-0.158126	1.02487	-0.154289	0.877382	1
LOC108698064	72.7787	0.108412	0.311905	0.34758	0.728156	1
LOC108698068	94.4932	0.541922	0.316377	1.7129	0.0867309	1
LOC108698070	5.46335	-2.02106	1.28384	-1.57423	0.115434	1
LOC108698071	1.28004	2.76234	2.46914	1.11875	0.263248	1
LOC108698072	366.96	0.0764308	0.184003	0.415377	0.677866	1
LOC108698074	495.897	-0.300077	0.143224	-2.09516	0.0361566	0.929555
LOC108698076	1280.71	0.464484	0.178908	2.59621	0.00942575	0.701237
LOC108698077	2.70608	-0.19102	1.75185	-0.109039	0.913171	1
LOC108698078	1.11249	-0.86871	2.54896	-0.34081	0.733247	1
LOC108698083	2.17169	-3.0766	2.35966	-1.30383	0.192291	1
LOC108698084	210.151	0.150853	0.251428	0.599984	0.548517	1
LOC108698085	438.369	-0.214254	0.186344	-1.14978	0.250235	1
LOC108698086	458.177	-0.180648	0.182622	-0.989193	0.322569	1
LOC108698087	66.8183	-1.02427	0.669095	-1.53083	0.125812	1
LOC108698088	4.05967	1.01373	1.62635	0.623316	0.533077	1
LOC108698089	101.308	-0.169508	0.321189	-0.527751	0.597672	1
LOC108698090	21.1551	0.122893	0.777413	0.158079	0.874394	1
LOC108698091	300.32	-0.102557	0.189483	-0.541244	0.588339	1
LOC108698093	115.128	0.579137	0.260142	2.22624	0.0259983	0.888178
LOC108698095	2.48275	3.51599	2.24804	1.56403	0.117812	1
LOC108698096	50.4027	0.307997	0.444119	0.693503	0.487994	1
LOC108698097	29.5175	-0.268913	0.588185	-0.457191	0.647534	1	X
LOC108698099	1051.28	0.0742165	0.239921	0.309337	0.757065	1
LOC108698100	26.7629	-0.221594	0.561287	-0.394796	0.692994	1
LOC108698101	2.72578	1.68464	1.81875	0.926261	0.35431	1
LOC108698102	3.33292	-0.710716	1.7266	-0.411627	0.680613	1
LOC108698103	53.5609	0.63307	0.349172	1.81306	0.0698227	1
LOC108698104	391.694	-0.0282495	0.160897	-0.175575	0.860628	1
LOC108698105	13.0555	-0.0681849	0.687726	-0.0991455	0.921023	1
LOC108698106	0.875777	-0.520822	2.5288	-0.205956	0.836825	1
LOC108698107	8.40758	-0.11534	0.936256	-0.123193	0.901955	1
LOC108698109	190.129	-0.252714	0.234641	-1.07702	0.28147	1
LOC108698110	1.71767	-2.71822	2.30115	-1.18124	0.237506	1
LOC108698113	4.30628	2.73023	2.00998	1.35834	0.174357	1
LOC108698116	2.15666	0.509394	2.23592	0.227823	0.819784	1
LOC108698118	4.93204	-0.884066	1.4394	-0.61419	0.53909	1
LOC108698119	1.97172	-0.700121	2.06694	-0.338724	0.734818	1
LOC108698121	2.76954	4.39496	1.98059	2.21902	0.0264856	0.889732
LOC108698122	4.06035	-0.00899687	1.53092	-0.00587678	0.995311	1
LOC108698123	9.42489	0.154694	0.811379	0.190656	0.848795	1
LOC108698132	708.66	0.471503	0.160664	2.93472	0.00333844	0.546862
LOC108698133	107.726	0.351545	0.284713	1.23473	0.216929	1
LOC108698134	14.0479	0.273182	0.657445	0.41552	0.677761	1
LOC108698136	218.567	0.328383	0.28399	1.15632	0.24755	1
LOC108698137	44.0355	-0.420776	0.364331	-1.15493	0.24812	1
LOC108698138	3.0853	-4.56599	1.70678	-2.67521	0.00746822	0.653903
LOC108698139	54.9832	2.04721	0.532073	3.8476	0.000119281	0.179977
LOC108698140	1.1448	1.5509	2.2656	0.684541	0.493634	1
LOC108698141	426.635	-0.179701	0.169967	-1.05727	0.290387	1
LOC108698145	2.99019	-1.94521	1.80496	-1.0777	0.281169	1
LOC108698149	1189.4	-0.121377	0.221237	-0.548628	0.583261	1
LOC108698152	31.5355	-0.146416	0.601384	-0.243466	0.807645	1
LOC108698153	44.3389	-0.41823	0.384088	-1.08889	0.276202	1
LOC108698154	19.9165	-0.705199	0.637396	-1.10637	0.268564	1
LOC108698157	2.2674	0.349785	1.76666	0.197992	0.843051	1
LOC108698158	3.3195	0.340562	1.53086	0.222464	0.823953	1
LOC108698160	4.37484	0.461073	1.40784	0.327503	0.743288	1
LOC108698162	10.8117	-0.622332	0.854536	-0.728268	0.466449	1
LOC108698163	1141.55	-0.0537395	0.125118	-0.42951	0.667552	1
LOC108698165	61.3435	-0.240158	0.422429	-0.568515	0.569685	1
LOC108698169	7.58578	0.330872	1.23092	0.268801	0.788083	1
LOC108698170	1.67506	-1.77062	2.61001	-0.678396	0.497521	1
LOC108698172	85.4804	-0.210975	0.309123	-0.682495	0.494926	1
LOC108698178	6.02527	1.08292	1.59313	0.67974	0.496669	1
LOC108698179	537.817	-0.322488	0.165233	-1.95172	0.0509717	0.987234
LOC108698182	6.40761	0.967112	1.38527	0.698141	0.485089	1
LOC108698183	6.09352	-0.121916	0.913919	-0.133399	0.893877	1
LOC108698184	11.765	0.511264	0.782222	0.653605	0.513366	1
LOC108698186	8.64174	-1.71991	0.924807	-1.85975	0.0629204	1
LOC108698187	194.108	-0.222636	0.242518	-0.918017	0.35861	1
LOC108698189	69.6392	0.54841	0.312685	1.75388	0.0794517	1		X
LOC108698191	781.562	-0.174778	0.213711	-0.817822	0.413459	1
LOC108698194	185.896	0.579279	0.316743	1.82886	0.0674207	1
LOC108698195	1.06857	0.754244	3.0593	0.246541	0.805264	1
LOC108698196	117.871	0.230601	0.337514	0.683236	0.494458	1
LOC108698198	2.59451	0.463754	1.83568	0.252634	0.800551	1
LOC108698199	17.7512	-0.011817	0.657787	-0.0179647	0.985667	1
LOC108698200	13.9728	-1.06152	0.663481	-1.59992	0.109617	1
LOC108698202	33.5948	-0.268028	0.390856	-0.685747	0.492873	1
LOC108698211	26.8374	-0.232075	0.517841	-0.44816	0.654038	1
LOC108698213	5.35293	1.07166	1.31541	0.814701	0.415243	1
LOC108698214	61.1411	0.32047	0.386824	0.828464	0.407408	1
LOC108698216	9.30677	0.62377	0.904016	0.689999	0.490195	1
LOC108698217	4.82819	0.915434	1.20698	0.75845	0.448182	1		X
LOC108698218	1.28838	-0.484734	2.37409	-0.204177	0.838215	1
LOC108698220	181.064	-0.137688	0.233933	-0.588577	0.556145	1
LOC108698222	2.25129	-0.625048	1.67761	-0.372582	0.70946	1
LOC108698223	1.15336	1.71688	2.94381	0.583218	0.559746	1
LOC108698226	18.5693	0.261845	0.590004	0.443803	0.657185	1
LOC108698227	71.9056	-0.238924	0.379362	-0.629803	0.528824	1
LOC108698228	137.906	0.12186	0.25014	0.487166	0.626141	1
LOC108698229	204.119	-0.155987	0.209255	-0.745437	0.456008	1
LOC108698230	658.668	-0.25758	0.154828	-1.66365	0.096183	1
LOC108698231	1.59529	0.89351	2.1778	0.410282	0.681599	1
LOC108698232	113.683	0.0960562	0.249618	0.384813	0.700376	1		X
LOC108698234	1.35516	1.49512	2.38216	0.627631	0.530246	1
LOC108698236	4.88184	1.21934	1.25884	0.968621	0.332734	1
LOC108698238	288.238	-0.403356	0.227751	-1.77104	0.0765538	1
LOC108698239	799.497	-0.0164378	0.181795	-0.0904191	0.927954	1
LOC108698242	692.395	-0.231773	0.152196	-1.52286	0.127793	1
LOC108698243	108.099	0.242445	0.265218	0.914134	0.360646	1
LOC108698244	12.5702	0.327092	0.911647	0.358793	0.71975	1
LOC108698250	7.2781	0.223999	1.15336	0.194214	0.846008	1
LOC108698252	18.8984	0.463791	1.38595	0.334638	0.737898	1
LOC108698253	115.641	-0.0563901	0.299276	-0.188422	0.850546	1
LOC108698254	243.288	0.356839	0.246037	1.45035	0.146962	1
LOC108698255	118.096	0.266371	0.262032	1.01656	0.309364	1
LOC108698259	0.962054	1.34916	3.0245	0.446076	0.655542	1
LOC108698260	23.6757	0.074022	0.591086	0.12523	0.900341	1
LOC108698261	2.89198	-1.1838	1.59061	-0.744243	0.45673	1
LOC108698262	2456.46	-0.0562481	0.125115	-0.449571	0.65302	1
LOC108698263	179.241	0.29743	0.233376	1.27447	0.202497	1	X
LOC108698265	31.6721	0.668836	0.517734	1.29185	0.196409	1
LOC108698269	215.867	0.0715037	0.213783	0.334469	0.738026	1
LOC108698272	25.2413	0.367282	0.466542	0.787244	0.431139	1
LOC108698278	74.8671	0.0479609	0.434705	0.11033	0.912148	1
LOC108698280	346.22	0.169961	0.222297	0.764568	0.444529	1
LOC108698283	627.922	-0.284155	0.173025	-1.64228	0.100531	1
LOC108698286	22.3118	-0.411151	0.630301	-0.652309	0.514202	1
LOC108698287	101.255	-0.153317	0.260412	-0.588747	0.556031	1
LOC108698288	624.257	0.0210359	0.148999	0.141181	0.887727	1
LOC108698289	653.029	0.00226057	0.138372	0.0163369	0.986966	1
LOC108698291	885.308	0.00167503	0.122247	0.013702	0.989068	1
LOC108698293	5.55945	0.158982	1.33129	0.119419	0.904943	1
LOC108698296	35.0796	-0.00203158	0.510032	-0.00398324	0.996822	1
LOC108698297	3.47619	-0.894661	1.27106	-0.70387	0.481514	1
LOC108698299	1.59926	0.434671	2.09729	0.207253	0.835812	1
LOC108698300	2.28834	-1.8272	2.52454	-0.723777	0.469203	1
LOC108698301	6.06511	0.318127	1.17131	0.271598	0.785931	1
LOC108698303	6.29433	1.3137	0.98831	1.32924	0.183769	1
LOC108698306	4.78253	2.14776	1.42975	1.5022	0.133045	1
LOC108698307	4.38606	-2.27381	1.28942	-1.76344	0.0778271	1
LOC108698309	1.18285	0.0708328	3.17077	0.0223393	0.982177	1
LOC108698310	323.073	-0.123752	0.195858	-0.631846	0.527488	1
LOC108698313	1279.41	-0.0325707	0.140104	-0.232474	0.81617	1
LOC108698315	2.90814	0.369172	1.82389	0.202409	0.839597	1
LOC108698316	1.57639	1.56944	2.47688	0.633633	0.52632	1
LOC108698318	8.80991	-0.60134	1.23347	-0.487518	0.625891	1
LOC108698319	3.85074	0.0685125	1.38966	0.0493016	0.960679	1
LOC108698320	7.5324	0.174304	1.12422	0.155045	0.876786	1
LOC108698321	2.38952	0.384377	1.43069	0.268666	0.788187	1
LOC108698322	9.57729	0.525268	0.810548	0.648041	0.516959	1
LOC108698323	1340.39	-0.134502	0.164337	-0.818451	0.4131	1
LOC108698325	33.9818	-0.490152	0.510052	-0.960985	0.33656	1
LOC108698326	2.21921	-0.107437	1.97487	-0.054402	0.956615	1
LOC108698327	2.59862	-0.838225	1.61834	-0.517954	0.60449	1
LOC108698329	663.482	-0.0581273	0.155844	-0.372984	0.709161	1
LOC108698330	4.15015	-0.000642732	1.53785	-0.000417943	0.999667	1
LOC108698332	20.1237	-0.304702	0.847233	-0.359644	0.719114	1
LOC108698334	1038.29	-0.117087	0.11209	-1.04458	0.296216	1
LOC108698335	41.3908	0.385211	0.49225	0.782551	0.433891	1
LOC108698336	20.8636	1.14029	0.871029	1.30913	0.190491	1
LOC108698337	1.11764	0	3.45644	0	1	1
LOC108698338	1.07108	2.29683	3.23502	0.70999	0.477711	1
LOC108698339	128.676	-0.263577	0.266541	-0.98888	0.322722	1
LOC108698340	14.1554	0.258078	0.718607	0.359136	0.719494	1
LOC108698341	7.41348	0.97187	1.11987	0.867843	0.385481	1
LOC108698343	6.6193	0.579303	1.2063	0.480231	0.631063	1
LOC108698344	20.13	0.62956	0.61408	1.02521	0.305265	1
LOC108698345	3.10009	0.47628	1.4751	0.32288	0.746786	1
LOC108698346	3.00442	2.07156	1.41718	1.46174	0.143812	1
LOC108698348	0.860864	0.193368	2.71269	0.0712827	0.943173	1
LOC108698350	18.5547	1.15897	0.787895	1.47097	0.141298	1
LOC108698352	1.18367	-1.10525	2.40862	-0.458872	0.646326	1
LOC108698355	1.32725	-0.60453	2.30116	-0.262706	0.792777	1
LOC108698356	3.97235	0.812706	1.44449	0.562625	0.57369	1
LOC108698359	43.542	0.418381	0.387776	1.07892	0.280622	1
LOC108698363	45.9139	0.206506	0.398044	0.518801	0.6039	1
LOC108698364	1.123	-2.90893	2.9509	-0.985777	0.324242	1
LOC108698365	1.74819	0.372106	1.79196	0.207653	0.8355	1
LOC108698366	47.5722	-0.204406	0.531535	-0.384558	0.700565	1
LOC108698367	307.094	0.760414	0.286402	2.65506	0.00792955	0.661598
LOC108698369	216.535	-0.315015	0.213752	-1.47374	0.140552	1
LOC108698370	1055.53	-0.0887643	0.150989	-0.587886	0.556609	1
LOC108698373	77.6643	-0.20325	0.338001	-0.601329	0.547621	1
LOC108698374	9.11628	0.455446	1.35376	0.33643	0.736547	1
LOC108698375	36.2026	-0.317186	0.436291	-0.727005	0.467223	1
LOC108698376	16.3369	-0.302821	0.731433	-0.414011	0.678866	1
LOC108698377	402.046	0.0267546	0.185245	0.144428	0.885162	1
LOC108698386	2221.78	-0.407244	0.136257	-2.9888	0.00280076	0.505127
LOC108698387	1.96061	4.18	2.44603	1.7089	0.0874704	1
LOC108698393	164.328	-0.227147	0.272979	-0.832105	0.40535	1
LOC108698396	18.7376	-0.524766	0.58524	-0.896668	0.369896	1
LOC108698399	132.329	0.0396773	0.271114	0.146349	0.883646	1
LOC108698402	35.5999	0.470611	0.521451	0.902503	0.36679	1
LOC108698411	1627.89	-0.185617	0.158039	-1.1745	0.240195	1
LOC108698412	316.066	-0.215764	0.212712	-1.01435	0.310415	1
LOC108698413	2.6163	-0.0032942	1.91033	-0.00172441	0.998624	1
LOC108698414	3.38802	2.83061	1.87887	1.50655	0.131926	1
LOC108698415	3.95856	0.913302	1.37419	0.664612	0.506299	1
LOC108698416	3.1671	0.760059	1.68396	0.451352	0.651736	1
LOC108698420	2.03591	0.522142	2.08584	0.250327	0.802335	1
LOC108698422	765.437	-0.120501	0.152182	-0.791819	0.428466	1		X
LOC108698424	2.30054	-2.9142	4.07442	-0.715242	0.47446	1
LOC108698428	388.783	-0.326046	0.198349	-1.6438	0.100218	1
LOC108698429	2.12234	-0.00830304	2.17745	-0.00381319	0.996958	1
LOC108698430	25.2179	0.0501216	0.586542	0.0854527	0.931901	1
LOC108698434	148.945	-0.140221	0.236431	-0.593074	0.553132	1
LOC108698435	2.05624	-1.20815	1.82537	-0.661867	0.508057	1
LOC108698436	6.87327	0.115414	1.31691	0.0876399	0.930163	1
LOC108698439	42.0679	-0.583762	0.41472	-1.4076	0.159249	1
LOC108698443	7.13166	-0.0257087	1.33168	-0.0193055	0.984597	1
LOC108698445	4882.57	-0.269813	0.125731	-2.14595	0.0318773	0.910562
LOC108698446	135.56	-0.416686	0.349337	-1.19279	0.232951	1
LOC108698449	100.833	-0.242686	0.262011	-0.926245	0.354319	1
LOC108698451	325.871	-0.155202	0.212711	-0.729637	0.465612	1
LOC108698454	2.96361	2.08874	2.12487	0.982997	0.325609	1
LOC108698462	87.6608	0.507122	0.335932	1.5096	0.131146	1
LOC108698465	4.64928	-1.58759	1.26294	-1.25706	0.208733	1
LOC108698472	1.13195	0	3.20527	0	1	1
LOC108698474	488.475	-0.247524	0.197448	-1.25362	0.209981	1
LOC108698479	23.1744	0.777802	0.537899	1.446	0.148178	1
LOC108698480	159.166	0.199386	0.216858	0.919427	0.357872	1
LOC108698483	611.225	0.0210905	0.151161	0.139523	0.889037	1
LOC108698486	17.1082	0.0635496	0.785721	0.0808806	0.935537	1
LOC108698487	11.9855	0.229462	0.815273	0.281454	0.778362	1
LOC108698488	53.0756	-0.355546	0.317497	-1.11984	0.262782	1
LOC108698490	2.75429	-2.40784	1.95702	-1.23036	0.218561	1
LOC108698491	237.985	-0.206673	0.23286	-0.887542	0.374787	1
LOC108698494	2.33787	1.02816	1.74362	0.589668	0.555414	1
LOC108698496	54.032	0.233511	0.420067	0.555889	0.578287	1
LOC108698497	91.4836	-0.0952565	0.331659	-0.287212	0.77395	1
LOC108698499	883.323	-0.0153637	0.145661	-0.105476	0.915998	1
LOC108698502	1079.92	0.512829	0.150772	3.40136	0.000670516	0.354435
LOC108698509	2.67222	-2.53669	2.04323	-1.24151	0.214419	1
LOC108698511	19.9043	-0.230858	0.581608	-0.396931	0.691419	1
LOC108698512	7.09788	0.501648	1.05092	0.477343	0.633118	1
LOC108698515	17.6218	-0.0304562	0.592841	-0.0513733	0.959028	1
LOC108698516	47.241	0.0659472	0.401049	0.164437	0.869387	1
LOC108698518	269.907	-0.315894	0.166475	-1.89755	0.0577557	1
LOC108698519	613.308	0.0647889	0.176377	0.367332	0.713372	1
LOC108698520	2.39553	-0.451188	1.44985	-0.311195	0.755652	1
LOC108698522	2.59949	-0.756328	1.73713	-0.435389	0.66328	1
LOC108698523	68.7688	0.435599	0.366677	1.18797	0.234847	1
LOC108698525	1040.34	0.201372	0.123249	1.63387	0.102286	1
LOC108698528	26.5429	0.181567	0.551251	0.329372	0.741875	1
LOC108698529	231.163	0.182025	0.226523	0.80356	0.421651	1
LOC108698532	38.5747	0.0810339	0.376203	0.2154	0.829456	1
LOC108698533	86.7399	0.0716976	0.340445	0.210599	0.8332	1
LOC108698534	68.4434	0.0652369	0.347545	0.187708	0.851106	1
LOC108698535	48.8702	0.49019	0.373993	1.31069	0.189962	1
LOC108698538	16.0229	0.343933	0.740047	0.464745	0.642114	1
LOC108698539	8.47997	1.78684	1.30934	1.36468	0.172353	1
LOC108698540	71.5828	0.486584	0.330686	1.47144	0.141172	1		X
LOC108698541	9.64136	-0.507654	0.92748	-0.547348	0.58414	1
LOC108698543	1288.65	-0.0175066	0.135698	-0.129012	0.897348	1
LOC108698544	460.262	-0.0407489	0.214402	-0.190059	0.849263	1
LOC108698547	17.4561	0.0461155	0.695667	0.0662896	0.947147	1
LOC108698548	104.659	0.564696	0.352814	1.60055	0.109477	1
LOC108698550	7.58496	0.545277	1.06503	0.511982	0.608664	1
LOC108698551	15.0067	-1.05323	2.76317	-0.381166	0.70308	1
LOC108698553	22.8174	-0.00405634	0.632241	-0.00641581	0.994881	1
LOC108698556	300.251	0.094819	0.2517	0.376714	0.706386	1
LOC108698561	3.27901	-1.33614	1.49263	-0.895159	0.370702	1
LOC108698563	112.786	0.588776	0.283857	2.0742	0.0380612	0.937997
LOC108698564	54.981	0.380441	0.339756	1.11975	0.262822	1
LOC108698565	1.33765	-0.127983	2.28624	-0.0559798	0.955358	1
LOC108698570	211.79	0.358333	0.245132	1.46179	0.143798	1
LOC108698571	67.7494	0.21625	0.359172	0.60208	0.547121	1
LOC108698574	9.77664	0.191957	1.1136	0.172375	0.863142	1
LOC108698575	99.8183	0.229342	0.985673	0.232676	0.816013	1
LOC108698577	17.6174	0.423545	0.588114	0.720175	0.471417	1
LOC108698579	41.5737	0.113392	0.507613	0.223383	0.823237	1
LOC108698584	213.903	-0.208382	0.201567	-1.03381	0.301224	1
LOC108698587	202.183	0.156436	0.192969	0.81068	0.417549	1		X
LOC108698589	1.88731	1.8275	2.43163	0.751555	0.452318	1
LOC108698590	15.1354	0.0199152	0.781019	0.025499	0.979657	1
LOC108698591	36.5403	-0.128724	0.574524	-0.224054	0.822716	1
LOC108698592	1.25503	-4.53613	2.69661	-1.68216	0.0925381	1
LOC108698593	48.8439	-0.0151184	0.426654	-0.0354349	0.971733	1
LOC108698597	34.2294	0.379744	0.426831	0.889681	0.373637	1
LOC108698598	319.972	0.0443744	0.209323	0.21199	0.832115	1
LOC108698599	1.63119	2.97556	2.1821	1.36362	0.172686	1
LOC108698600	55.6245	0.423588	0.376991	1.1236	0.261182	1
LOC108698601	1.17383	0.60695	2.09417	0.289828	0.771948	1
LOC108698602	18.4204	-0.150994	0.728695	-0.207212	0.835844	1
LOC108698603	63.5029	-0.127581	0.430227	-0.296543	0.766816	1
LOC108698604	1163.27	-0.325939	0.2163	-1.50688	0.131841	1
LOC108698608	163.744	-0.257624	0.25854	-0.996458	0.319028	1
LOC108698609	293.812	-0.0271364	0.193487	-0.140249	0.888463	1
LOC108698611	2.27219	-2.19248	2.40976	-0.909832	0.362911	1
LOC108698613	2.14156	0.31528	1.62882	0.193563	0.846518	1
LOC108698614	849.124	-0.186046	0.141811	-1.31193	0.189543	1
LOC108698616	143.878	-0.07669	0.242339	-0.316458	0.751655	1		X
LOC108698617	44.8135	0.377558	0.521709	0.723694	0.469254	1
LOC108698627	1.28895	-1.06892	2.98485	-0.358116	0.720257	1
LOC108698628	295.143	-0.0464796	0.221665	-0.209684	0.833914	1
LOC108698629	201.768	-0.0248107	0.216547	-0.114574	0.908783	1
LOC108698631	69.2189	0.239029	0.315311	0.758076	0.448406	1
LOC108698632	205.145	0.5568	0.267329	2.08283	0.0372668	0.932873
LOC108698633	2.05906	0.0977531	1.83046	0.0534035	0.95741	1
LOC108698634	365.931	-0.153917	0.184474	-0.834356	0.40408	1
LOC108698636	9.65325	0.344475	0.778405	0.442539	0.658099	1		X
LOC108698639	1.12941	-1.87928	3.05671	-0.614805	0.538684	1
LOC108698641	2.9514	-1.88966	2.32963	-0.811143	0.417284	1
LOC108698646	6.58018	-2.06668	1.25278	-1.64968	0.0990089	1
LOC108698650	57.2969	0.0604681	0.383977	0.157479	0.874868	1
LOC108698651	3.42469	1.52498	1.5516	0.982844	0.325684	1
LOC108698652	84.4553	0.468588	0.31941	1.46704	0.142364	1
LOC108698657	312.249	-0.29069	0.19603	-1.48289	0.138105	1	X
LOC108698658	605.273	-0.128356	0.167131	-0.767996	0.44249	1
LOC108698659	44.4467	-0.457694	0.412014	-1.11087	0.266625	1
LOC108698662	1.33355	0.582848	2.68967	0.216698	0.828443	1
LOC108698663	535.629	-0.158358	0.166475	-0.951247	0.341479	1
LOC108698666	45.8277	-0.545448	0.487602	-1.11863	0.263297	1
LOC108698669	141.574	0.0354049	0.3321	0.106609	0.915099	1
LOC108698670	29.5542	0.474964	0.469554	1.01152	0.311767	1
LOC108698671	23.1176	0.354978	0.534206	0.664497	0.506373	1
LOC108698673	640.971	0.164903	0.147007	1.12173	0.261976	1
LOC108698674	331.865	0.207155	0.19719	1.05053	0.293474	1
LOC108698675	2.66704	0.945059	2.10991	0.447914	0.654215	1
LOC108698678	5.73323	0.716512	1.30286	0.549953	0.582351	1
LOC108698681	2.5724	-0.655665	2.00952	-0.326279	0.744213	1
LOC108698682	49.4169	0.531599	0.430865	1.23379	0.21728	1
LOC108698685	13.7406	0.238105	1.05946	0.224742	0.82218	1
LOC108698691	492.737	0.0329104	0.13136	0.250537	0.802172	1
LOC108698694	2.1153	-0.582016	1.87427	-0.31053	0.756158	1
LOC108698695	1.1599	0	3.59058	0	1	1
LOC108698698	1.45055	1.35849	2.08267	0.652282	0.514219	1
LOC108698702	220.163	0.176785	0.248315	0.711939	0.476503	1
LOC108698705	59.8107	-0.100455	0.373297	-0.269102	0.787851	1
LOC108698707	45.2115	-0.200218	0.470443	-0.425594	0.670404	1
LOC108698708	4.42117	0.225494	1.60508	0.140488	0.888275	1
LOC108698711	2.58667	0.085423	1.44671	0.0590465	0.952915	1
LOC108698712	251.195	-0.412114	0.253934	-1.62292	0.104607	1
LOC108698714	39.0565	-0.312838	0.486218	-0.643411	0.519958	1
LOC108698715	23.0326	0.434945	0.886922	0.490398	0.623852	1
LOC108698716	270.872	-0.0465054	0.185852	-0.250229	0.80241	1
LOC108698721	23.6819	0.7001	0.537093	1.3035	0.192404	1
LOC108698723	46.632	0.124245	0.408349	0.304261	0.760929	1
LOC108698725	29.0513	0.456373	0.553394	0.82468	0.409553	1
LOC108698731	16.5287	-0.499162	0.643496	-0.775703	0.437925	1
LOC108698735	140.736	-0.201888	0.266635	-0.75717	0.448948	1
LOC108698736	239.621	-0.110565	0.204574	-0.540464	0.588877	1
LOC108698739	89.065	-0.0781887	0.309549	-0.252589	0.800586	1
LOC108698741	1.76437	-1.53979	2.32227	-0.663056	0.507295	1
LOC108698753	153.997	0.134218	0.264722	0.507016	0.612144	1
LOC108698755	1.28554	-1.06891	2.74933	-0.388791	0.697431	1
LOC108698757	474.641	0.219919	0.167274	1.31472	0.188603	1
LOC108698758	1.04062	2.70631	2.73408	0.989842	0.322251	1
LOC108698759	2.80258	0.689604	1.5373	0.44858	0.653734	1
LOC108698763	3.23773	-2.18534	1.62026	-1.34876	0.177413	1
LOC108698766	169.493	-0.0676713	0.237322	-0.285145	0.775533	1	X
LOC108698773	23.5033	0.51942	0.589783	0.880697	0.378482	1
LOC108698775	510.448	-0.158258	0.195566	-0.809228	0.418384	1		X
LOC108698782	436.397	0.196003	0.157841	1.24177	0.214321	1
LOC108698787	216.729	0.0742617	0.214332	0.34648	0.728982	1
LOC108698788	42.1691	0.309999	0.481801	0.643417	0.519954	1
LOC108698789	11.2228	0.409952	0.902935	0.454021	0.649814	1
LOC108698791	2.1879	0.0376005	2.26701	0.016586	0.986767	1
LOC108698796	2.53445	2.55403	1.9713	1.2956	0.195112	1
LOC108698799	438.181	-0.209783	0.186441	-1.1252	0.260504	1
LOC108698800	3.91386	-3.31131	1.62037	-2.04355	0.0409983	0.958856
LOC108698801	2.43704	1.01927	1.74373	0.584535	0.558861	1
LOC108698802	2.80406	-0.964966	1.48155	-0.651324	0.514838	1
LOC108698803	509.433	-0.187982	0.17918	-1.04912	0.294121	1
LOC108698804	20.8056	0.244823	0.487978	0.501709	0.615872	1
LOC108698806	1.6074	-1.06892	3.18018	-0.336118	0.736782	1
LOC108698808	35.0343	-0.230485	0.531648	-0.43353	0.66463	1
LOC108698813	67.8363	-0.308697	0.309184	-0.998424	0.318074	1
LOC108698814	2.18833	-2.4384	1.90369	-1.28089	0.200234	1
LOC108698815	523.035	-0.0972582	0.173326	-0.561128	0.57471	1		X
LOC108698817	18.6873	0.748494	0.611623	1.22378	0.221034	1
LOC108698820	1601.84	-0.183291	0.134109	-1.36673	0.17171	1
LOC108698821	6.00301	-0.954888	1.00263	-0.952382	0.340903	1
LOC108698822	94.7092	0.279346	0.302002	0.924979	0.354977	1
LOC108698823	181.974	0.252828	0.256061	0.987376	0.323458	1
LOC108698825	22.5706	0.746373	0.548042	1.36189	0.173233	1
LOC108698829	69.2176	-0.0127336	0.420951	-0.0302496	0.975868	1
LOC108698830	75.6536	0.386153	0.306761	1.25881	0.2081	1
LOC108698831	3.90214	0.190754	1.27615	0.149476	0.881178	1
LOC108698835	73.2373	-0.214164	0.313596	-0.682931	0.49465	1		X
LOC108698836	39.8971	0.192337	0.438099	0.439026	0.660643	1
LOC108698837	404.341	-0.194593	0.161737	-1.20315	0.22892	1
LOC108698839	13.9366	-1.04906	0.848938	-1.23574	0.216557	1
LOC108698840	176.812	-0.00761288	0.256484	-0.0296817	0.976321	1
LOC108698843	4.86707	0.230733	1.21038	0.190629	0.848816	1
LOC108698846	1.11491	-2.8017	2.83253	-0.989117	0.322606	1
LOC108698851	6.41912	-2.65497	1.12175	-2.36681	0.0179422	0.841003
[truncated: 33,722 more rows]

## Sheet: MB_st44v55
geneSymbol	baseMean	log2FoldChange	lfcSE	stat	pvalue	padj	NPC Enriched	IN Enriched
12S ribosomal RNA	77.0496	-0.525528	0.314337	-1.67186	0.0945518	0.266143
16S ribosomal RNA	27009	-0.147661	0.150695	-0.979866	0.327152	0.578573
1a11.L	6.53734	-3.28897	1.12127	-2.93327	0.00335415	0.0244978
42sp43.L	1.59716	0.804432	1.99611	0.403	0.686949	1
42sp50.L	4.39422	1.72751	1.35531	1.27462	0.202443	0.435998		X
ATP6	422.192	-0.174771	0.184004	-0.949823	0.342202	0.593549
ATP8	24.8953	-0.033377	0.500881	-0.0666366	0.946871	0.979822
COX1	19338.1	-0.277952	0.117519	-2.36517	0.0180216	0.0847883
COX2	3788.69	0.25131	0.203171	1.23694	0.216111	0.453405
COX3	5527.09	-0.134656	0.172829	-0.77913	0.435903	0.678035
CYTB	29.3519	0.0182568	0.550695	0.0331523	0.973553	0.991094
LOC100036663.S	1.80625	-1.88258	2.20405	-0.854149	0.393022	1
LOC100036800.S	1.12252	3.95936	3.24564	1.2199	0.222501	1
LOC100036803	679.422	-0.236879	0.153662	-1.54156	0.123181	0.318053
LOC100036818	4.79567	-1.17939	1.36826	-0.861964	0.388708	0.638288
LOC100036823	5.10454	0.00793888	1.26808	0.00626056	0.995005	0.99816
LOC100036824	1.67297	-2.73799	2.6121	-1.0482	0.294548	1
LOC100036831	399.79	0.106423	0.191973	0.554366	0.579328	0.785537
LOC100036845	5.87299	0.634862	1.58722	0.399983	0.689169	0.852002
LOC100036845.L	1.28729	2.43972	2.54025	0.960426	0.336841	1
LOC100036869	96.7205	0.908472	0.316442	2.8709	0.00409307	0.028444
LOC100036872	9.09164	1.74631	0.877406	1.99031	0.0465572	0.16542
LOC100036883	1.51176	1.63808	2.98323	0.549094	0.582941	1
LOC100036897	1.13502	2.0455	2.57694	0.793772	0.427328	1
LOC100036907.L	49.3918	1.42215	0.484946	2.9326	0.00336133	0.0245254
LOC100036910	700.899	-0.163277	0.24894	-0.655891	0.511894	0.737392
LOC100036915	267.056	-0.670059	0.202282	-3.3125	0.000924649	0.00905892
LOC100036932	4.0773	2.74141	1.68012	1.63168	0.102747	0.281512
LOC100036952	22.047	1.50555	0.583332	2.58096	0.00985269	0.0546119
LOC100036976	10.7305	-0.833155	0.932918	-0.893063	0.371823	0.62191
LOC100036994	368.702	1.41528	0.18638	7.59352	3.11339e-14	5.0918e-12
LOC100036997	31.1515	1.02539	0.5247	1.95424	0.050673	0.175436
LOC100037001	448.341	0.12519	0.174557	0.717185	0.47326	0.708905
LOC100037016	18.1945	0.268488	0.801487	0.334988	0.737634	0.878829
LOC100037047	1.04821	-0.712373	2.61454	-0.272466	0.785263	1
LOC100037090	242.52	0.172251	0.220726	0.780382	0.435166	0.677236
LOC100037108	629.886	0.795135	0.173155	4.59204	4.3894e-06	0.000109674
LOC100037118	31.0167	-0.430584	0.60739	-0.708909	0.478381	0.713199
LOC100037145	10.6997	1.48701	0.906879	1.6397	0.101067	0.278317
LOC100037177	60.8503	5.7735	0.722646	7.98939	1.35603e-15	2.74873e-13
LOC100037180	9.87896	-0.508822	1.13604	-0.447891	0.654232	0.833315
LOC100037204	2.1138	0.65548	2.2077	0.296907	0.766538	1
LOC100037213	418.489	-0.395399	0.206193	-1.91762	0.0551592	0.186001
LOC100037217	31.4085	-6.91091	1.27726	-5.41073	6.27695e-08	2.84222e-06
LOC100037226	194.274	-0.0632688	0.253369	-0.24971	0.802812	0.911941
LOC100037235	62.35	-0.432687	0.348488	-1.24161	0.214379	0.451324
LOC100037903.1	2.65372	-1.41765	1.41333	-1.00305	0.315836	1
LOC100049113	12.4194	0.67995	0.822681	0.826505	0.408517	0.656528
LOC100049116	351.463	-0.317739	0.17701	-1.79503	0.0726485	0.224441
LOC100049121	324.809	1.18716	0.236088	5.02844	4.94476e-07	1.68438e-05
LOC100049127	61.3578	0.168291	0.316965	0.530944	0.595457	0.796419
LOC100049136	1713.67	0.310362	0.200269	1.54973	0.121207	0.314565
LOC100049756	2.39611	-2.30976	2.11537	-1.09189	0.27488	1
LOC100101277	216.212	-0.524991	0.199964	-2.62543	0.00865403	0.0496606
LOC100101281	49.6533	-0.489713	0.355687	-1.37681	0.168572	0.389521
LOC100101282	7.8298	1.80571	1.06848	1.68998	0.0910309	0.25984
LOC100101283	87.7329	0.766439	0.336303	2.27901	0.0226664	0.100027		X
LOC100101333	88.1008	0.755365	0.351845	2.14687	0.0318037	0.127126
LOC100125664	5.57346	0.625312	1.24421	0.502578	0.615261	0.810004
LOC100125668	243.621	-0.144417	0.310716	-0.464787	0.642084	0.825919
LOC100126603	30.4162	-0.373719	0.451794	-0.82719	0.408129	0.656291
LOC100126627	1.39741	0.825385	2.89916	0.284699	0.775875	1
LOC100126638	30.7823	-1.38926	0.477583	-2.90893	0.00362663	0.0260158
LOC100126648	82.0987	0.0389431	0.332524	0.117114	0.90677	0.961684
LOC100126651	20.8759	0.873196	0.576529	1.51458	0.12988	0.329119
LOC100126657	3.31009	1.3224	1.3718	0.963993	0.33505	1
LOC100126660	98.5135	0.158419	0.30369	0.521646	0.601917	0.800775
LOC100127249	1.29718	-3.35048	3.0223	-1.10859	0.267609	1
LOC100127277	27.339	-5.95008	1.03793	-5.73265	9.8874e-09	5.51548e-07
LOC100127280	27.1517	1.51615	0.508043	2.98429	0.00284233	0.0217995
LOC100127286	21.1439	0.482234	0.579865	0.831632	0.405617	0.654223
LOC100127287	2.3652	0.7264	1.89267	0.383797	0.701129	1
LOC100127296	104.984	-0.446104	0.286635	-1.55635	0.119625	0.312118
LOC100127300	119.273	0.552463	0.277836	1.98845	0.0467615	0.165925
LOC100127316	54.3099	0.355982	0.402765	0.883847	0.376779	0.626745
LOC100127323	118.065	-0.546651	0.315269	-1.73392	0.0829326	0.244913
LOC100127329	1961.72	-0.111362	0.100876	-1.10395	0.269617	0.517797
LOC100127334	2.94365	4.9123	1.97351	2.48911	0.0128062	1
LOC100127794.L	21.031	2.89373	0.964035	3.00169	0.00268485	0.0209036
LOC100135120.L	105.348	-0.462113	0.281722	-1.64031	0.10094	0.27815
LOC100135146.L	3.77925	2.38807	1.55707	1.53369	0.125106	0.321466
LOC100135146.S	4.55752	-0.0758083	1.33669	-0.0567135	0.954773	0.983389
LOC100137612	78.0131	-0.336386	0.302746	-1.11111	0.266519	0.514393
LOC100137633	4.06569	1.36379	1.72705	0.789666	0.429723	0.673187
LOC100137634	228.452	0.454771	0.229066	1.98533	0.0471079	0.166784		X
LOC100137643	3.66984	2.39862	1.56381	1.53383	0.125071	1
LOC100137665	4.49022	-0.728554	1.32426	-0.550161	0.582209	0.787403
LOC100137672	23.0817	1.33946	0.576106	2.32502	0.0200709	0.0915173
LOC100137672.S	111.763	2.30443	0.274888	8.38316	5.15235e-17	1.28961e-14
LOC100137678	2.38663	2.06225	1.92802	1.06962	0.284789	1
LOC100137691	39.5655	-1.3599	0.433022	-3.14048	0.00168672	0.014504
LOC100137715	1.23852	2.81344	2.82754	0.995013	0.31973	1
LOC100145345.L	6.88824	-0.0679515	1.01927	-0.0666671	0.946847	0.979822
LOC100145450.S	138.558	-0.265867	0.240714	-1.10449	0.269379	0.517541
LOC100145473.S	0.833656	3.23605	3.98988	0.811063	0.417329	1
LOC100145531.L	21.7098	0.627602	0.578294	1.08527	0.277804	0.52687
LOC100145533.L	32.2171	0.876844	0.550486	1.59285	0.111193	0.297009
LOC100158280	5.42251	-1.13667	1.56065	-0.728329	0.466412	0.703792
LOC100158299	288.377	-0.32715	0.192545	-1.69909	0.0893029	0.256955
LOC100158305.L	8.71505	4.00402	1.6846	2.37684	0.0174615	0.0828376
LOC100158314	1.83778	3.53091	2.31177	1.52736	0.126672	1
LOC100158321	104.844	-0.213091	0.385117	-0.553315	0.580047	0.785982
LOC100158331	34.784	-0.182675	0.552274	-0.33077	0.740818	0.8802
LOC100158340	743.019	-0.000190472	0.159821	-0.00119179	0.999049	0.999639
LOC100158347	217.995	-0.0269916	0.218092	-0.123762	0.901503	0.959797
LOC100158361	288.106	-0.188699	0.237496	-0.794535	0.426884	0.670664
LOC100158366	15.9368	-1.95535	0.731516	-2.67301	0.00751731	0.0447618
LOC100158370	143.857	-0.318408	0.249113	-1.27817	0.201191	0.4343
LOC100158382	120.119	-0.579247	0.239489	-2.41868	0.0155768	0.0760581
LOC100158389	1.73351	-2.70911	2.27755	-1.18948	0.234249	1
LOC100158394	231.721	-0.0582045	0.176257	-0.330224	0.741231	0.880437
LOC100158410.L	92.5139	-0.657686	0.301611	-2.18058	0.0292146	0.11972
LOC100158433.L	41.2036	-1.31395	0.407152	-3.22718	0.00125017	0.0113876
LOC100158544.S	0.874413	-1.56112	2.97596	-0.524578	0.599877	1
LOC100170619.S	6.28503	-1.05307	1.08807	-0.967833	0.333128	0.584573
LOC100174801	6.93855	2.38303	1.17431	2.02931	0.0424271	0.155056
LOC100174804	476.356	-0.26684	0.237065	-1.1256	0.260336	0.507174
LOC100174808	2.73476	2.92785	1.86892	1.5666	0.117207	1
LOC100189560	139.165	0.592048	0.369969	1.60027	0.10954	0.29415
LOC100189574	115.074	0.0450661	0.275375	0.163654	0.870004	0.944044
LOC100191024	23.5494	0.0870437	0.622465	0.139837	0.888789	0.953767
LOC100191026	282.476	-0.120042	0.176626	-0.679641	0.496732	0.72763
LOC100192369	14.3671	0.652885	0.682516	0.956586	0.338776	0.590417
LOC100217319	65.7123	-0.435452	0.77394	-0.562644	0.573677	0.781868
LOC100301958	51.8825	0.534512	0.411495	1.29895	0.19396	0.425044
LOC100335021	19.9947	-0.650822	0.577426	-1.12711	0.259697	0.506409
LOC100335115	1184.31	0.090904	0.746463	0.12178	0.903074	0.960227
LOC100337617	2.10475	0.467649	2.21309	0.21131	0.832645	1
LOC100379118	13.6341	-0.0246755	0.816373	-0.0302258	0.975887	0.991596
LOC100462904	1013.69	-0.404574	0.170222	-2.37675	0.0174661	0.0828376
LOC100462905	1008.19	-0.371766	0.228514	-1.62688	0.103762	0.283167
LOC100485017.S	1.81832	3.64214	2.14963	1.69431	0.090207	1
LOC100485044.L	3.34808	-2.54512	1.62569	-1.56557	0.11745	1
LOC100485105.S	1.77263	-0.136373	2.64483	-0.0515623	0.958877	1
LOC100485199-like.S	30.8131	1.48141	0.574481	2.57869	0.0099175	0.0548499
LOC100485290.L	44.2678	0.224853	0.397061	0.566293	0.571194	0.779761
LOC100485292.L	3.01744	2.31222	1.98281	1.16613	0.24356	1
LOC100485470.1.L	24.7381	2.53533	0.591446	4.28667	1.81372e-05	0.000360291
LOC100485669.L	15.8257	2.46935	0.905864	2.72596	0.00641147	0.0396382
LOC100485723.L	2.07975	-5.04036	2.25246	-2.23772	0.0252396	1
LOC100485829.S	15.4112	7.01916	1.34399	5.22263	1.76398e-07	7.11095e-06
LOC100485975.L	2.73812	-0.136392	2.49396	-0.054689	0.956386	1
LOC100486127.S	10.3846	-2.08199	1.02645	-2.02833	0.0425267	0.155224
LOC100486133.S	78.3363	0.104684	0.387406	0.270216	0.786994	0.903694
LOC100486352-like.S	1.09401	2.83576	2.8361	0.99988	0.317369	1
LOC100486380.L	6.92637	0.942388	0.938171	1.00449	0.31514	0.5663
LOC100486434-like.L	1.44457	0.879699	2.25162	0.390696	0.696022	1
LOC100486734-like.L	4.57354	1.02029	1.18946	0.857773	0.391018	0.640875
LOC100486734-like.S	4.00247	-1.33603	1.3891	-0.961795	0.336152	0.587802
LOC100486894.S	1.72942	-0.57371	1.73471	-0.330724	0.740853	1
LOC100486966.L	5.31315	0.754938	1.20315	0.627469	0.530352	0.750487
LOC100487224.L	74.0552	1.36731	0.459158	2.97786	0.0029027	0.0220852
LOC100487262.S	70.1119	-0.194085	0.28729	-0.67557	0.499314	0.72915
LOC100487412.L	1.96313	-0.0562757	2.42554	-0.0232013	0.98149	1
LOC100487482.S	1.60969	2.98922	2.52318	1.18471	0.236133	1
LOC100487499.S	223.009	0.0761007	0.190775	0.398903	0.689965	0.852198
LOC100487668.L	11.814	-1.49668	0.772653	-1.93707	0.0527372	0.180434
LOC100487740.S	1.99313	-3.50535	2.39816	-1.46168	0.143829	1
LOC100488087.L	23.9403	0.30841	0.579878	0.531852	0.594828	0.796092
LOC100488177.S	2.37007	-0.446262	1.53047	-0.291584	0.770604	1
LOC100488227.L	1.6941	4.53922	2.32137	1.95541	0.0505349	1
LOC100488333.L	16.8424	0.930113	0.724718	1.28341	0.199347	0.432209
LOC100488348.S	4.38502	-1.6318	1.27104	-1.28384	0.199199	0.431986
LOC100488442.S	23.1953	-0.332405	0.591948	-0.561545	0.574426	0.782355
LOC100488486.L	2.634	-0.79258	1.49836	-0.528964	0.59683	1
LOC100488567.L	125.525	0.232826	0.263392	0.883953	0.376721	0.626745
LOC100488577.L	3.49837	-0.143447	1.88446	-0.0761211	0.939323	1
LOC100488626.L	45.82	-1.64642	0.388128	-4.24195	2.21589e-05	0.000428356
LOC100488689.S	100.338	-0.793966	0.38057	-2.08625	0.0369556	0.140981
LOC100488697.L	4.6125	4.32544	1.749	2.47309	0.0133951	0.0680812
LOC100488701.S	2.60916	2.72797	1.96712	1.38679	0.165506	1
LOC100488828.L	1.26721	0.28571	2.44696	0.116761	0.907049	1
LOC100488885-like.L	356.046	0.562749	0.165637	3.39749	0.000680072	0.00707452
LOC100489122.L	11.0571	0.910953	0.860843	1.05821	0.289959	0.539998
LOC100489188.L	6.96266	-2.52114	1.24028	-2.03272	0.0420803	0.154259
LOC100489326.S	7.44812	1.52408	0.995995	1.53021	0.125965	0.323124
LOC100489554.L	1.12004	4.13547	3.18536	1.29827	0.194193	1
LOC100489764.L	2.14716	-0.621167	1.8451	-0.336658	0.736374	1
LOC100489771.S	70.2018	0.49031	0.350234	1.39995	0.161529	0.379547
LOC100489773-like.S	23.4693	0.123414	0.5746	0.214783	0.829937	0.925462
LOC100489832.L	1.18282	-0.932265	2.41964	-0.385291	0.700022	1
LOC100489882.L	1.44018	1.25684	2.73806	0.459025	0.646216	1
LOC100490018.L	3.80207	-1.54965	1.53545	-1.00925	0.312855	0.563989
LOC100490389-like.L	1.6631	1.16052	2.36066	0.491607	0.622997	1
LOC100490462.L	3.07423	2.05401	1.86268	1.10272	0.27015	1
LOC100490530.L	60.0348	-0.0911494	0.307395	-0.296522	0.766831	0.893195
LOC100490553.S	1.50608	3.63371	2.66556	1.3632	0.172818	1
LOC100490559.S	31.3141	0.0607276	0.438602	0.138457	0.889879	0.954368
LOC100490741.L	36.4257	0.644043	0.488686	1.31791	0.187534	0.416062
LOC100490918.L	1.70406	-1.80829	2.13151	-0.848362	0.396236	1
LOC100490937.L	1.25765	2.17118	2.4131	0.899749	0.368254	1
LOC100491211.L	8.09842	0.276171	1.13263	0.243833	0.80736	0.914064
LOC100491437-like.L	22.8796	0.0646096	0.748713	0.0862942	0.931233	0.972944
LOC100491450.S	8.72397	-1.85678	0.917755	-2.02318	0.0430545	0.156613
LOC100491454.L	1.79952	-0.492078	2.01137	-0.244648	0.806729	1
LOC100491587.L	2.95658	-2.99488	2.20736	-1.35677	0.174855	1
LOC100491616-like.L	9.2335	0.880587	0.911491	0.966095	0.333997	0.585527
LOC100491629.S	1.38906	0.902712	2.40572	0.375235	0.707486	1
LOC100491907.S	2.72798	1.17945	1.47924	0.79733	0.425259	1
LOC100491930.L	8.12813	0.816158	1.08362	0.75318	0.451342	0.692152
LOC100491939.S	225.955	0.19881	0.193059	1.02979	0.30311	0.553527
LOC100492080.1	1.62793	2.06368	2.03924	1.01198	0.311546	1
LOC100492197-like.L	330.819	0.460359	0.179814	2.5602	0.0104613	0.0570842
LOC100492420.S	2.15204	-1.99436	2.0271	-0.983853	0.325188	1
LOC100492487.S	145.206	0.0960861	0.323342	0.297166	0.76634	0.893122
LOC100492639-like.S	2.64606	-0.650889	1.41098	-0.461303	0.644581	1
LOC100492643.L	1.45606	2.99587	2.38606	1.25558	0.20927	1
LOC100492708	36.0038	0.768745	0.454796	1.69031	0.0909693	0.259722
LOC100492859.S	1.80366	0.344047	2.06042	0.166979	0.867386	1
LOC100492885.L	63.649	0.351726	0.352151	0.998794	0.317895	0.568941
LOC100492888-like.L	19.8296	1.82091	0.686308	2.65319	0.00797339	0.046714
LOC100492899.L	3.09139	-0.0891542	1.72964	-0.051545	0.958891	1
LOC100492951-like.S	238.189	-0.449662	0.247397	-1.81757	0.0691293	0.216449
LOC100493071.L	4.49678	1.71698	1.66399	1.03185	0.302144	0.552617
LOC100493076.L	1.01171	-1.83331	3.2906	-0.557135	0.577435	1
LOC100493184.L	1.51629	0.304475	2.04402	0.148959	0.881586	1
LOC100493237.L	3.69492	1.25067	1.84585	0.677561	0.49805	0.728238
LOC100493283-like.L	33.6461	-0.756039	0.468327	-1.61434	0.106454	0.288257
LOC100493356.L	1.08105	1.17234	2.5917	0.452343	0.651022	1
LOC100493381.L	1.41802	2.83062	2.46235	1.14956	0.250325	1
LOC100493382.L	79.6197	0.354769	0.31502	1.12618	0.26009	0.506834
LOC100493512.1	1.05939	0.675463	3.02889	0.223007	0.82353	1
LOC100493618.L	1.87858	1.34769	2.39569	0.56255	0.573742	1
LOC100493672.L	1.46381	3.7615	2.24735	1.67375	0.0941805	1
LOC100493745.L	268.344	0.00138201	0.20493	0.0067438	0.994619	0.998066
LOC100493912.S	23.0965	0.304928	0.656295	0.46462	0.642203	0.825929
LOC100493955.L	1.47515	-1.89754	2.90771	-0.652591	0.51402	1
LOC100493968.1.L	32.127	2.93646	0.585861	5.01222	5.38053e-07	1.81138e-05
LOC100494033.L	4.86352	0.260594	1.32014	0.197399	0.843515	0.931408
LOC100494136.L	2.84899	3.15197	1.69621	1.85824	0.0631355	1
LOC100494386.L	14.9147	0.182213	0.594434	0.306532	0.7592	0.889401
LOC100494476.L	69.0303	0.543976	0.348362	1.56152	0.1184	0.309878
LOC100494536.S	1.78395	0.222744	1.92617	0.115641	0.907937	1
LOC100494604.L	1.29805	3.10449	2.61146	1.18879	0.234521	1
LOC100494943.L	1.45592	4.61749	2.82103	1.63681	0.10167	1
LOC100495010.S	96.5166	0.303887	0.269083	1.12934	0.258753	0.505413
LOC100495012.S	1.978	0.597047	1.72799	0.345515	0.729707	1
LOC100495096.1	1.58538	1.48365	2.27325	0.652655	0.513979	1
LOC100495101.S	1.88084	2.39248	2.34865	1.01866	0.308364	1
LOC100495179.L	9.07719	2.01055	1.05411	1.90733	0.0564775	0.189306
LOC100495222.1.L	1.74412	4.34229	2.4154	1.79775	0.0722164	1
LOC100495347.1	1.78709	0.787093	1.89913	0.41445	0.678544	1
LOC100495379.L	2.80824	-0.426495	1.61131	-0.264688	0.79125	1
LOC100495655-like.S	1.49785	3.27626	2.56765	1.27598	0.201963	1
LOC100495874.L	1.10773	2.65449	3.31613	0.800476	0.423435	1
LOC100495895.S	74.9572	0.102928	0.322177	0.319478	0.749364	0.884477
LOC100496010.S	9.55725	0.114376	0.794803	0.143905	0.885576	0.952612
LOC100496074-like.L	6.14292	1.08135	0.922126	1.17267	0.24093	0.484859
LOC100496137-like.L	37.5101	0.928933	0.560847	1.6563	0.0976606	0.27208
LOC100496293.L	1.50435	0.825378	2.79789	0.295001	0.767993	1
LOC100496329.S	10.5843	-0.872905	0.96598	-0.903646	0.366183	0.616338
LOC100496372.L	1.62932	3.64621	2.80584	1.29951	0.193769	1
LOC100496462.L	21.624	2.46187	0.699525	3.51934	0.000432619	0.00490836
LOC100496618.L	1.18367	-0.882425	2.8471	-0.309939	0.756608	1
LOC100496658.L	12.0359	1.59508	0.78426	2.03387	0.0419647	0.153913
LOC100496716.L	35.412	1.11957	0.622277	1.79914	0.0719959	0.222999
LOC100496797-like.L	34.8152	-0.560461	0.560044	-1.00075	0.31695	0.567963
LOC100496797.L	129.416	-0.419669	0.304969	-1.3761	0.168791	0.389837
LOC100496837.S	4.42662	-0.821151	1.28979	-0.636656	0.524349	0.746177
LOC100496844.L	3.79966	0.344991	1.25487	0.274922	0.783376	0.902112
LOC100496870.L	5.09047	-1.1946	1.20286	-0.993134	0.320645	0.572115
LOC100496873.L	2.63081	0.966292	1.93374	0.4997	0.617286	1
LOC100496891.S	3.5588	1.67248	1.28809	1.29842	0.194144	1
LOC100496975.L	2.08035	3.13338	2.43705	1.28572	0.19854	1
LOC100496975.S	40.265	-0.475626	0.41402	-1.1488	0.250638	0.49614
LOC100497020.L	9.80164	-0.35836	0.923615	-0.387997	0.698019	0.856463
LOC100497184.L	247.777	0.13014	0.248864	0.522937	0.601018	0.800222
LOC100497309.L	3.92063	0.728965	1.67264	0.435817	0.662969	0.837778
LOC100497432.L	1.21096	0	3.49575	0	1	1
LOC100497489.S	10.8505	1.22992	0.756451	1.62591	0.103969	0.283556
LOC100497500.S	3.32529	1.66461	1.48059	1.12429	0.26089	1
LOC100497556.L	4.0537	-0.646334	1.34729	-0.479729	0.63142	0.819903
LOC100497703.S	13.2074	0.0976411	0.79354	0.123045	0.902071	0.96016
LOC100497709.L	3.35406	0.00101064	1.42986	0.00070681	0.999436	1
LOC100497740.L	4.90745	4.51047	1.85505	2.43146	0.0150381	0.0742084
LOC100497848.L	3.64308	1.40224	1.35565	1.03437	0.300963	1
LOC100497909.S	11.4367	3.54427	1.0476	3.38322	0.000716421	0.00736217
LOC100497953.L	13.5743	-1.6106	0.832644	-1.93432	0.0530736	0.181179
LOC100498064.L	1.62266	-0.544139	1.98479	-0.274155	0.783966	1
LOC100498247.S	1.32667	-1.96726	2.3909	-0.822812	0.410615	1
LOC100498327.L	13.4315	1.04503	0.740521	1.41121	0.158184	0.374342
LOC100498450.S	1.78981	-0.730028	2.04684	-0.35666	0.721346	1
LOC100498477.L	2.42838	1.84674	2.09231	0.882631	0.377436	1
LOC100498517.L	27.5458	0.0206323	0.452681	0.045578	0.963647	0.987654
LOC100498590.S	1.75614	1.20305	1.85535	0.648422	0.516712	1
LOC100498594.S	1.78526	0.889773	2.54969	0.348973	0.727109	1
LOC100505442	178.084	-0.30927	0.241369	-1.28132	0.200082	0.433216
LOC100505446	429.898	-0.136275	0.183776	-0.741528	0.458374	0.697975
LOC100653495	126.748	-0.568912	0.310593	-1.8317	0.0669962	0.211914
LOC100653497	74.2949	0.422014	0.328854	1.28329	0.199392	0.432217
LOC100653500	4.51812	-4.5996	1.61645	-2.8455	0.00443424	0.030094
LOC100653501	3.56339	0.223904	1.50659	0.148616	0.881857	1
LOC100653508	185.27	0.751724	0.231362	3.24912	0.00115762	0.0107487
LOC100653509	852.261	-0.22956	0.167559	-1.37003	0.170678	0.392396
LOC101027264	24.5611	-1.22301	0.688353	-1.77672	0.0756143	0.230853
LOC101027269	34.9117	0.0493067	0.418543	0.117806	0.906222	0.961412
LOC101027277	990.696	-0.260244	0.150398	-1.73037	0.083565	0.246121
LOC101027278	1053.46	-0.193965	0.146139	-1.32726	0.184423	0.411604
LOC101027285	821.057	0.0812458	0.158957	0.511117	0.609269	0.806121
LOC101027288	568.172	0.0377327	0.176838	0.213375	0.831035	0.925967
LOC101027289	2.80304	1.49071	1.71827	0.867569	0.38563	1
LOC101027292	28.7802	-1.02143	0.585162	-1.74556	0.0808878	0.240848
LOC101027307	7.11365	1.68107	1.18472	1.41896	0.155911	0.371073
LOC101027309	339.362	-0.00236575	0.201147	-0.0117613	0.990616	0.99671
LOC101243550	136.638	0.323632	0.292232	1.10745	0.268099	0.516289
LOC101243553	19.8509	2.29559	0.590854	3.88521	0.000102241	0.00150687
LOC101243554	31.6287	1.37314	0.732332	1.87502	0.0607898	0.198815
LOC101730276.L	24.6016	2.50896	0.785462	3.19425	0.00140197	0.0124588
LOC101730314.L	54.3675	-0.0831702	0.421333	-0.197398	0.843516	0.931408
LOC101730464.L	2.16342	3.08266	2.04945	1.50414	0.132546	1
LOC101730503.L	1.37771	0.498659	2.18131	0.228605	0.819176	1
LOC101730510.1	1.32833	2.30988	3.24478	0.711874	0.476543	1
LOC101730652.S	4.153	1.46165	1.26999	1.15091	0.249767	0.495131
LOC101730692.L	4.26171	0.951175	1.41239	0.673449	0.500662	0.729609
LOC101730710.L	1.75621	-0.474602	2.4216	-0.195987	0.84462	1
LOC101730711.S	28.7605	-0.440664	0.481688	-0.914833	0.360279	0.610951
LOC101730741.L	1.16715	-2.47077	3.14239	-0.786271	0.431709	1
LOC101730771-like.L	1.13079	4.43713	3.47233	1.27785	0.201301	1
LOC101730771-like.S	1.11794	2.06373	2.65112	0.778437	0.436312	1
LOC101730807.L	1.1131	1.72162	2.8379	0.606652	0.544082	1
LOC101730911.S	1.48289	-0.129038	2.936	-0.0439502	0.964944	1
LOC101730997.L	1.78284	1.09574	2.40419	0.455763	0.64856	1
LOC101730999.S	1.78917	2.13087	1.93894	1.09898	0.271775	1
LOC101731180.S	0.963278	2.94029	3.56387	0.825026	0.409357	1
LOC101731218.S	55.4173	0.816255	0.432308	1.88813	0.0590081	0.194736		X
LOC101731372.S	1.29654	2.12158	2.22564	0.953248	0.340465	1
LOC101731405.L	20.0377	0.672192	0.641777	1.04739	0.294918	0.545947
LOC101731405.S	7.66646	0.782536	1.07691	0.726647	0.467442	0.704553
LOC101731454.L	5.44258	-0.00628741	1.15979	-0.00542115	0.995675	0.998582
LOC101731554.S	1.26387	1.37632	2.81171	0.489494	0.624492	1
LOC101731692.S	0.935673	0.643668	3.16119	0.203616	0.838654	1
LOC101731735.L	16.8778	1.48822	0.688817	2.16054	0.0307309	0.123888
LOC101731735.S	32.3879	1.45068	0.506542	2.86388	0.00418482	0.0289071
LOC101731753.L	1.17494	-0.293131	2.60056	-0.112719	0.910254	1
LOC101731794.L	1.50411	-1.05584	2.66704	-0.395886	0.692189	1
LOC101732168.S	1.94601	-3.09043	2.16704	-1.4261	0.153838	1
LOC101732174.L	3.98954	1.51828	1.29504	1.17238	0.241043	0.485045
LOC101732183.L	18.0364	0.563801	0.543472	1.03741	0.299547	0.550526
LOC101732265-like.L	2.99561	0.516238	1.86289	0.277117	0.781691	1
LOC101732299.L	14.0667	1.02595	0.790357	1.29808	0.19426	0.425312
LOC101732334	1.17496	-1.09816	3.78304	-0.290287	0.771597	1
LOC101732336.L	5.991	-0.0896297	1.0118	-0.0885849	0.929412	0.971862
LOC101732363.S	5.89145	2.03041	1.07292	1.89242	0.0584349	0.193621
LOC101732646	36.4001	0.884916	0.483422	1.83052	0.0671716	0.212302
LOC101732807.L	214.658	0.3076	0.200325	1.53551	0.12466	0.320489
LOC101732837.L	14.1126	-0.210312	0.606026	-0.347035	0.728565	0.873234
LOC101732880.S	9.70706	0.743461	0.927346	0.801708	0.422722	0.667927
LOC101732886.L	1.45055	1.78221	2.38331	0.747789	0.454588	1
LOC101732896.L	1.55964	1.43184	2.79935	0.511488	0.609009	1
LOC101732913.L	0.854846	4.39192	3.83909	1.144	0.252624	1
LOC101732945.L	58.8635	-0.842561	0.400673	-2.10287	0.0354775	0.136833
LOC101733023.S	2.80282	2.92218	2.24016	1.30445	0.192079	1
LOC101733142.L	1.64016	-2.45176	2.3275	-1.05339	0.292162	1
LOC101733157.L	1.19327	-2.19986	2.50818	-0.877076	0.380445	1
LOC101733178.L	39.386	0.480511	0.488057	0.984539	0.32485	0.576302
LOC101733219.L	3.07624	1.63279	1.70551	0.957359	0.338386	1
LOC101733221.L	3.92593	0.864794	1.36705	0.632598	0.526996	0.748092
LOC101733232.S	11.9182	0.0181429	0.790704	0.0229452	0.981694	0.993463
LOC101733399.1.L	2.04809	-2.03314	1.89547	-1.07263	0.283436	1
LOC101733496-like.L	74.4959	-0.718144	1.01063	-0.710591	0.477338	0.71227
LOC101733559.L	221.341	0.822571	0.284544	2.89084	0.0038421	0.0271078
LOC101733560.1.S	156.072	0.855062	0.283373	3.01744	0.00254916	0.0200698
LOC101733572.S	7.8143	0.0351105	0.937863	0.0374367	0.970137	0.990082
LOC101733597.1.S	2.28967	-4.0373	1.99834	-2.02033	0.0433493	1
LOC101733718-like.L	9.66329	-0.20604	0.890778	-0.231303	0.817079	0.919013
LOC101733845.L	1.42257	-0.042876	2.32424	-0.0184473	0.985282	1
LOC101733845.S	6.39957	0.301087	1.15591	0.260477	0.794496	0.907923
LOC101733888.L	5.13467	1.28863	1.17455	1.09713	0.272585	0.521118
LOC101733911.L	2.34317	0.00976391	2.082	0.00468967	0.996258	1
LOC101733911.S	1.78196	-1.11871	2.45379	-0.455913	0.648452	1
LOC101734116.1.L	15.5873	5.02653	1.13745	4.41911	9.91081e-06	0.000217932
LOC101734172.L	2.57025	1.11203	1.96608	0.565606	0.571662	1
LOC101734280.L	16.5327	0.0918726	0.656463	0.139951	0.888699	0.953767
LOC101734280.S	9.92314	1.36413	0.915572	1.48992	0.136244	0.339895
LOC101734284-like.L	4.53807	-1.89927	1.44653	-1.31299	0.189188	0.418312
LOC101734474.S	2.7582	-2.84449	1.61773	-1.75832	0.0786927	1
LOC101734516.L	32.3796	-0.251532	0.470638	-0.534449	0.593031	0.795016
LOC101734522.1	3.2539	0.14781	1.45593	0.101522	0.919136	1
LOC101734588.L	1.2265	-0.84281	2.62369	-0.321231	0.748035	1
LOC101734605.L	29.4627	-0.919627	0.611264	-1.50447	0.132461	0.333714
LOC101734643.L	6.23228	2.31368	1.23951	1.8666	0.0619569	0.201306	X
LOC101734771.L	1.74509	-1.18235	2.22139	-0.532255	0.594549	1
LOC101734788.S	4.13569	2.98196	1.9489	1.53007	0.126	0.323156
LOC101734868.L	1.92437	1.13312	1.99818	0.567079	0.570661	1
LOC101734868.S	1.7433	2.34613	2.30185	1.01924	0.30809	1
LOC101734999.S	111.428	-0.170764	0.367865	-0.464204	0.642502	0.826045
LOC101735002.S	2.67447	2.28186	1.98156	1.15155	0.249507	1
LOC101735009.S	56.6607	-0.502865	0.349844	-1.4374	0.150605	0.362884
LOC101735010.S	1.37886	-0.604803	2.76953	-0.218377	0.827135	1
LOC101735056.L	63.5704	0.858092	0.359116	2.38946	0.0168733	0.0805841
LOC101735082.S	1.03736	1.31772	2.77794	0.474354	0.635248	1
LOC101735121-like.L	45.3019	-1.2001	0.472036	-2.5424	0.0110095	0.0591558
LOC101735124-like.S	15.7107	0.377292	0.696637	0.54159	0.588101	0.791467
LOC105945384.S	1.5427	-0.274146	2.19118	-0.125114	0.900434	1
LOC105945417.L	57.7736	0.984155	0.486355	2.02353	0.0430184	0.156502
LOC105945479	1.19756	1.70272	2.97135	0.573046	0.566614	1
LOC105945545.L	9.78012	1.50916	0.96814	1.55882	0.119039	0.310954
LOC105945780.L	45.5232	1.91125	0.489105	3.90764	9.3203e-05	0.001398
LOC105945786.L	1.16895	1.44009	2.93703	0.49032	0.623907	1
LOC105946022.S	16.4078	0.0536525	0.670176	0.0800574	0.936192	0.974865
LOC105946344.L	2.10135	0.685806	1.98136	0.346128	0.729246	1
LOC105946425.L	1.31267	3.34213	2.98891	1.11818	0.263492	1
LOC105946688.L	18.0122	0.0349306	0.626992	0.0557115	0.955572	0.983768
LOC105946688.S	1.86437	-1.12071	1.92599	-0.581886	0.560644	1
LOC105946830.L	2.23297	2.54327	1.97637	1.28684	0.19815	1
LOC105946874.L	2.41668	-2.46196	1.87575	-1.31252	0.189346	1
LOC105946897.L	3.2661	0.298329	1.39015	0.214602	0.830078	1
LOC105947003.L	4.97262	0.870955	1.28165	0.679556	0.496786	0.72764
LOC105947173.L	1.35864	-1.09817	3.11028	-0.353078	0.72403	1
LOC105947229.L	3.7421	-0.953471	1.38442	-0.688715	0.491003	0.72295
LOC105947339.L	1.45291	-0.743376	2.53335	-0.293436	0.769189	1
LOC105947410.L	41.0229	0.930351	0.510651	1.82189	0.0684712	0.214997
LOC105947450.S	65.9559	-0.49289	0.33738	-1.46093	0.144034	0.352541
LOC105947790.L	25.2869	0.755118	0.608437	1.24108	0.214577	0.451622
LOC105947790.S	3.01703	1.93522	1.67107	1.15807	0.246835	1
LOC105947835.S	1.57562	-0.0144692	2.19176	-0.00660163	0.994733	1
LOC105947871.L	53.3669	0.863576	0.391229	2.20734	0.0272903	0.114208
LOC105948127	1.31036	4.39298	3.09814	1.41794	0.156208	1
LOC105948534	1.13184	0.00629671	2.54848	0.00247077	0.998029	1
LOC105948557.L	1.84961	-0.25312	2.46086	-0.102858	0.918076	1
LOC108695214	3.88939	-0.947743	1.3085	-0.724296	0.468884	0.705627
LOC108695216	2.45464	-0.486136	1.61059	-0.301837	0.762776	1
LOC108695217	70.1249	-0.234144	0.445213	-0.525915	0.598948	0.798745
LOC108695218	2.31421	-3.1853	2.1383	-1.48964	0.136318	1
LOC108695221	29.3871	1.21742	0.519842	2.34191	0.0191855	0.0888123
LOC108695223	19.9007	1.66807	0.659762	2.5283	0.0114617	0.0609036
LOC108695227	258.705	-0.469394	0.198389	-2.36603	0.0179798	0.084647
LOC108695228	1.32893	-2.16987	2.38556	-0.909585	0.363041	1
LOC108695232	129.323	0.0688433	0.318929	0.215858	0.829098	0.9251
LOC108695237	62.1398	1.38099	0.398429	3.46608	0.000528097	0.00576788
LOC108695239	8.78167	0.415387	0.76727	0.541384	0.588243	0.791547
LOC108695240	251.634	0.929146	0.218765	4.24724	2.16422e-05	0.000419944
LOC108695244	2.44716	2.30629	1.96598	1.1731	0.240757	1
LOC108695247	540.177	0.292567	0.142413	2.05435	0.0399414	0.148519
LOC108695251	174.641	-1.32958	0.23064	-5.76477	8.17678e-09	4.68846e-07
LOC108695252	343.539	-0.27324	0.166601	-1.64008	0.100988	0.278192
LOC108695254	7.6694	-0.364126	0.961349	-0.378766	0.704862	0.859365
LOC108695258	40.3824	0.225173	0.50741	0.44377	0.657209	0.834978
LOC108695259	413.978	0.463669	0.170135	2.7253	0.00642425	0.03969
LOC108695260	254.772	-0.485943	0.721525	-0.673495	0.500633	0.729609
LOC108695261	220.358	0.253479	0.217096	1.16759	0.242974	0.487603
LOC108695263	46.1966	-0.595335	0.493393	-1.20661	0.227581	0.46814
LOC108695265	8.40759	3.99358	1.35637	2.94432	0.00323668	0.0238546
LOC108695270	393.222	-0.712327	0.163739	-4.35037	1.35906e-05	0.000282245
LOC108695271	28.1173	1.77556	0.67052	2.64804	0.008096	0.0472018
LOC108695273	1.61135	-1.07709	1.93349	-0.557071	0.577479	1
LOC108695274	1.24707	-0.966088	2.39426	-0.403502	0.686579	1
LOC108695278	33.6343	-0.573548	0.481251	-1.19179	0.233346	0.475553
LOC108695279	2.11669	-0.202428	1.75621	-0.115264	0.908236	1
LOC108695284	1.3098	0.762954	3.19549	0.238759	0.811292	1
LOC108695285	309.83	-0.30331	0.178817	-1.6962	0.0898476	0.257742
LOC108695290	3.0982	0.556926	1.51821	0.36683	0.713746	1
LOC108695294	20.4141	-0.153973	0.589934	-0.261	0.794092	0.907566
LOC108695304	0.904696	1.25932	2.83896	0.443584	0.657344	1
LOC108695305	0.995491	-0.668964	2.93946	-0.22758	0.819972	1
LOC108695307	320.763	-0.190692	0.165868	-1.14966	0.250283	0.495821
LOC108695308	24.3438	-1.09315	0.476238	-2.29538	0.0217114	0.0970563
LOC108695309	66.0879	0.0132305	0.407196	0.0324916	0.97408	0.991148
LOC108695312	769.931	-0.122832	0.16765	-0.73267	0.46376	0.701833
LOC108695316	72.3292	-0.360689	0.340075	-1.06062	0.288865	0.53902
LOC108695319	1.44233	1.80691	2.40939	0.749944	0.453289	1
LOC108695329	533.495	-0.153522	0.163705	-0.937799	0.348348	0.599769
LOC108695330	2.66647	0.898507	1.70926	0.525669	0.599118	1
LOC108695331	84.1997	-0.173604	0.352189	-0.49293	0.622062	0.813846
LOC108695332	354.533	-0.245429	0.225977	-1.08608	0.277444	0.526603
LOC108695335	7.51776	0.362429	0.965807	0.37526	0.707467	0.861109
LOC108695342	1.81288	0.492782	2.05407	0.239905	0.810404	1
LOC108695343	48.9495	-0.313569	0.345858	-0.906641	0.364597	0.61492
LOC108695344	25.306	2.56348	0.702229	3.6505	0.000261735	0.00324359
LOC108695345	4199.24	0.31975	0.169153	1.8903	0.0587176	0.19416
LOC108695348	3.6282	-0.0971344	1.62361	-0.0598261	0.952294	1
LOC108695349	340.751	0.0989659	0.196576	0.503448	0.614649	0.809601
LOC108695356	16.5991	2.74069	0.803068	3.41278	0.000643033	0.0067774
LOC108695358	6.14524	1.61569	1.16883	1.38231	0.166876	0.387369
LOC108695359	77.2051	-0.156465	0.286988	-0.545197	0.585618	0.78975
LOC108695360	247.773	0.140778	0.238566	0.590102	0.555122	0.769063	X
LOC108695362	1.09507	0.240825	2.74162	0.0878403	0.930004	1
LOC108695366	1.25477	3.42284	2.52954	1.35315	0.176008	1
LOC108695370	54.8893	-0.282501	0.37409	-0.755167	0.450149	0.691377
LOC108695373	65.4643	-0.0568348	0.374346	-0.151824	0.879326	0.948954
LOC108695374	163.125	-0.1463	0.246455	-0.593618	0.552767	0.767368
LOC108695380	27.2919	2.15709	0.588588	3.66485	0.000247481	0.00310144
LOC108695382	561.008	0.120158	0.173932	0.690834	0.48967	0.722031
LOC108695386	6.15085	0.101905	1.15134	0.0885103	0.929471	0.971862
LOC108695387	15.6285	-0.42038	0.675822	-0.622028	0.533923	0.753229
LOC108695393	1032.86	-1.1269	0.184063	-6.12238	9.21901e-10	6.37884e-08
LOC108695396	90.0238	0.722042	0.299396	2.41166	0.0158801	0.0771073	X
LOC108695398	8.4895	-0.845423	1.0246	-0.825122	0.409302	0.657038
LOC108695404	46.9333	0.335558	0.433889	0.773372	0.439302	0.68082
LOC108695405	5.8099	0.630212	1.19039	0.529419	0.596515	0.796941
LOC108695413	40.7088	0.9441	0.53324	1.7705	0.0766443	0.232862
LOC108695414	2.78497	-0.324567	1.6429	-0.197557	0.843392	1
LOC108695416	5.3431	0.0878072	1.15103	0.0762861	0.939191	0.975785
LOC108695417	57.9639	-0.312345	0.34248	-0.912008	0.361764	0.612086		X
LOC108695419	286.706	-0.337157	0.226893	-1.48598	0.137286	0.341744
LOC108695420	43.7488	0.68718	0.363884	1.88846	0.0589642	0.194616
LOC108695421	1.50466	-0.0241382	1.90753	-0.0126541	0.989904	1
LOC108695426	3.38622	-0.249418	1.72075	-0.144947	0.884753	1
LOC108695427	89.969	0.39305	0.292426	1.3441	0.178916	0.403924
LOC108695434	70.4702	-0.954134	0.308812	-3.08969	0.00200363	0.0166587
LOC108695435	115.036	-0.14493	0.296133	-0.48941	0.624552	0.815362
LOC108695438	123.278	0.380279	0.315187	1.20652	0.227618	0.468167
LOC108695440	1282.47	-0.253984	0.173776	-1.46156	0.143862	0.352209
LOC108695449	12.0888	-0.374796	0.675203	-0.555086	0.578836	0.785277
LOC108695450	8.92068	0.176421	0.936597	0.188363	0.850592	0.934621
LOC108695453	176.74	0.148234	0.207486	0.714428	0.474962	0.710385
LOC108695457	33.6961	-0.814023	0.472739	-1.72193	0.0850826	0.248992
LOC108695458	102.893	-0.0918566	0.249436	-0.368257	0.712681	0.864604
LOC108695459	260.917	-0.315946	0.177743	-1.77754	0.0754792	0.230514
LOC108695462	4.83065	-0.254557	1.32401	-0.192262	0.847537	0.933049
LOC108695463	314.868	0.199819	0.161386	1.23814	0.215663	0.452947
LOC108695464	2.22812	0.753208	1.82683	0.412303	0.680117	1
LOC108695465	11.7079	2.10871	1.04868	2.01084	0.0443428	0.159993		X
LOC108695467	1.47078	1.64728	2.44081	0.674891	0.499745	1
LOC108695469	1.60462	1.99577	2.08296	0.95814	0.337992	1
LOC108695470	2.22363	-0.930445	2.11115	-0.440729	0.659409	1
LOC108695472	3.80383	-0.394579	1.38477	-0.284943	0.775688	0.898463
LOC108695473	3.7422	0.645638	1.79822	0.359042	0.719563	0.868898
LOC108695474	86.6541	-0.161439	0.336178	-0.480218	0.631072	0.819747
LOC108695484	3.91522	-0.745355	1.40512	-0.530457	0.595795	0.796546
LOC108695486	1.32814	4.13533	2.67448	1.54622	0.122052	1
LOC108695487	45.6067	1.22644	0.420106	2.91935	0.00350758	0.0253238
LOC108695491	0.894413	-0.624041	2.55362	-0.244375	0.80694	1
LOC108695492	317.614	0.614389	0.214526	2.86393	0.00418419	0.0289071
LOC108695493	13.0081	0.0146493	0.809846	0.018089	0.985568	0.994723
LOC108695494	27.6936	0.135652	0.506675	0.267729	0.788908	0.904806
LOC108695496	1.26993	2.98647	2.74726	1.08707	0.277005	1
LOC108695498	22.5503	0.479332	0.60149	0.796908	0.425504	0.669604
LOC108695500	5.18947	1.10328	1.34471	0.820458	0.411955	0.659377
LOC108695501	41.7603	0.0408352	0.460106	0.0887518	0.929279	0.971862
LOC108695502	320.049	0.332155	0.213145	1.55835	0.11915	0.311161
LOC108695503	99.4041	-0.0886074	0.292771	-0.302651	0.762156	0.891159
LOC108695504	59.6588	0.602855	0.433782	1.38977	0.1646	0.384316
LOC108695505	120.043	0.303541	0.247529	1.22628	0.220092	0.458834		X
LOC108695506	29.0364	-0.575551	0.573987	-1.00272	0.315994	0.567268
LOC108695507	1.84897	4.47116	2.37183	1.88511	0.0594146	1
LOC108695509	62.6512	-0.310592	0.434914	-0.714145	0.475137	0.710497
LOC108695511	64.7209	0.286689	0.354784	0.808064	0.419053	0.665431
LOC108695512	89.7682	-0.432506	0.308443	-1.40222	0.160849	0.378552
LOC108695513	12.2061	-0.938512	0.751857	-1.24826	0.211937	0.447866
LOC108695514	1.51002	0.511795	2.22415	0.230108	0.818008	1
LOC108695515	141.07	0.395006	0.298226	1.32452	0.18533	0.412712
LOC108695517	90.9302	0.141997	0.304624	0.466138	0.641117	0.825556
LOC108695518	183.064	-0.173368	0.251271	-0.689964	0.490217	0.722462
LOC108695519	92.0534	0.287865	0.321823	0.894483	0.371064	0.621283
LOC108695520	123.131	0.799865	0.281458	2.84186	0.00448512	0.0303478
LOC108695521	63.1648	-0.323789	0.403395	-0.80266	0.422172	0.667612
LOC108695522	33.4132	0.403299	0.516665	0.780581	0.435049	0.677236
LOC108695525	106.12	0.147987	0.301077	0.491524	0.623056	0.814526
LOC108695526	95.2819	0.812305	0.359762	2.2579	0.0239521	0.104035
LOC108695527	467.048	-0.910325	0.184787	-4.92635	8.37798e-07	2.66387e-05
LOC108695528	48.3933	0.516967	0.335243	1.54206	0.123058	0.317848
LOC108695529	42.792	1.58286	0.511245	3.09609	0.00196091	0.0163745
LOC108695530	14.3192	1.37681	0.751576	1.8319	0.0669664	0.211911
LOC108695532	67.44	0.0912839	0.298117	0.306201	0.759452	0.889597
LOC108695533	7.89617	2.3055	0.986812	2.33631	0.0194752	0.0897351
LOC108695534	10.0863	1.07468	0.822475	1.30664	0.191334	0.42138
LOC108695535	105.595	-0.428788	0.275863	-1.55435	0.1201	0.312777
LOC108695536	98.352	0.0248952	0.318587	0.0781427	0.937715	0.975291
LOC108695537	116.649	0.734882	0.244865	3.00117	0.00268945	0.0209281
LOC108695538	69.3725	0.416589	0.355878	1.17059	0.241762	0.485955
LOC108695539	134.292	0.235587	0.259787	0.906847	0.364488	0.614896
LOC108695540	16.8009	2.53346	0.660198	3.83742	0.000124334	0.00177413
LOC108695541	25.2512	0.234731	0.55435	0.423436	0.671977	0.843464
LOC108695543	15.1095	1.73256	0.665638	2.60285	0.0092452	0.0521179
LOC108695544	48.934	0.235645	0.429104	0.549155	0.582899	0.787856
LOC108695546	7.97243	-1.06516	1.0624	-1.0026	0.316055	0.567342
LOC108695547	10.7293	1.11803	0.901522	1.24016	0.214916	0.452104
LOC108695548	93.6324	-0.22445	0.337164	-0.665698	0.505604	0.732611
LOC108695549	48.5121	-0.24605	0.593211	-0.414776	0.678306	0.846902
LOC108695550	3.3685	-0.363155	1.39404	-0.260506	0.794474	1
LOC108695551	20.9067	0.419546	0.587268	0.714403	0.474978	0.710385
LOC108695552	3.84459	0.82024	1.11323	0.736812	0.461237	0.700113
LOC108695554	20.0614	0.135807	0.556989	0.243824	0.807367	0.914064
LOC108695555	12.8581	-0.00297413	0.950973	-0.00312746	0.997505	0.999332
LOC108695556	29.7096	-0.171284	0.453921	-0.377344	0.705918	0.86003
LOC108695557	44.5513	-0.595872	0.490091	-1.21584	0.224047	0.463513
LOC108695559	14.6974	3.78642	0.961105	3.93965	8.16015e-05	0.0012628
LOC108695560	2.75493	0.622806	1.53381	0.406051	0.684705	1
LOC108695561	59.4785	-0.199065	0.416046	-0.47847	0.632316	0.820659
LOC108695562	27.8123	0.214133	0.54855	0.390362	0.696269	0.855478
LOC108695563	48.1769	-2.23737	0.49688	-4.50284	6.7052e-06	0.000156277
LOC108695564	30.4466	-0.14962	0.510316	-0.293192	0.769376	0.89486
LOC108695565	32.8759	-0.085647	0.600044	-0.142735	0.8865	0.953102
LOC108695567	29.1181	0.501889	0.540614	0.928368	0.353217	0.604674
LOC108695568	177.543	-0.0710901	0.218424	-0.325468	0.744827	0.882031
LOC108695569	5.21711	-0.331271	1.31375	-0.252157	0.80092	0.911133
LOC108695570	471.501	0.310182	0.145794	2.12753	0.0333761	0.13133
LOC108695571	3.5047	1.32785	1.45467	0.912821	0.361337	1
LOC108695573	8.01808	-0.542886	0.854176	-0.635567	0.525059	0.74649
LOC108695574	182.958	-0.653385	0.246806	-2.64736	0.00811232	0.0472586
LOC108695575	92.7296	-0.305155	0.327201	-0.932622	0.351015	0.602266
LOC108695576	286.61	0.344037	0.225643	1.5247	0.127335	0.325249
LOC108695577	110.776	-1.18065	0.385355	-3.0638	0.00218543	0.0178455
LOC108695578	1.04852	2.59134	3.2605	0.794767	0.426749	1
LOC108695579	409.195	-0.427855	0.272736	-1.56875	0.116705	0.306584
LOC108695580	449.328	0.314907	0.214184	1.47026	0.141491	0.34854
LOC108695581	1.04388	3.82479	2.73827	1.39679	0.162476	1
LOC108695582	956.865	-0.0166074	0.158221	-0.104963	0.916405	0.966382
LOC108695583	65.7811	0.427684	0.326243	1.31094	0.189879	0.419292
LOC108695585	69.1143	1.09346	0.423808	2.58008	0.00987761	0.0547285
LOC108695586	70.2125	0.08192	0.300915	0.272236	0.78544	0.903024		X
LOC108695587	1.23745	4.11429	2.58569	1.59118	0.11157	1
LOC108695588	9.13831	0.50136	0.966608	0.51868	0.603984	0.802005
LOC108695591	8.73406	2.05896	1.06804	1.9278	0.0538801	0.182995	X
LOC108695592	27.0569	-0.444253	0.488542	-0.909344	0.363168	0.613429
LOC108695598	1.57253	0.992744	2.03603	0.487589	0.625841	1
LOC108695630	0.910251	2.94012	3.60336	0.815938	0.414536	1
LOC108695632	1.81119	2.64667	2.05231	1.28961	0.197188	1
LOC108695636	1.81616	0.788407	2.15136	0.366469	0.714015	1
LOC108695638	13.2993	-0.0692648	0.993124	-0.0697444	0.944397	0.978583
LOC108695639	6.30166	-2.34489	1.19971	-1.95455	0.0506359	0.175328
LOC108695653	2.14111	1.90423	2.03985	0.933514	0.350555	1
LOC108695654	1.02223	1.83069	2.90383	0.63044	0.528407	1
LOC108695659	15.9212	0.250444	0.623177	0.401882	0.687771	0.851365
LOC108695660	1.65484	1.913	2.08392	0.917979	0.35863	1
LOC108695665	12.2885	1.50642	0.733648	2.05332	0.0400413	0.148783
LOC108695666	1.50482	-2.87297	2.88964	-0.99423	0.320111	1
LOC108695667	105.921	0.258306	0.35903	0.719456	0.47186	0.707803
LOC108695668	38.8858	0.523928	0.52114	1.00535	0.314729	0.565914		X
LOC108695669	38.4564	0.5417	0.527893	1.02616	0.304818	0.55545
LOC108695671	1372.32	0.381768	0.114299	3.34007	0.00083757	0.0083856
LOC108695672	59.4128	0.522035	0.415086	1.25766	0.208516	0.443569
LOC108695673	209.135	0.19379	0.259157	0.747771	0.454598	0.694665
LOC108695678	24.3968	1.26744	0.813385	1.55823	0.119178	0.311178
LOC108695679	1470.6	-0.0856498	0.127944	-0.669431	0.503221	0.731403
LOC108695680	3.71444	0.748784	1.386	0.540249	0.589025	0.792192
LOC108695685	1.4076	2.11677	2.77529	0.762719	0.445631	1
LOC108695689	17.653	0.89476	0.581022	1.53997	0.123566	0.318672
LOC108695690	353.926	0.418093	0.188673	2.21597	0.0266936	0.112546
LOC108695691	85.1109	1.17889	0.348066	3.38697	0.000706702	0.00729878
LOC108695693	1.39565	2.3628	2.55163	0.925998	0.354447	1
LOC108695694	72.0517	0.933862	0.355856	2.62427	0.00868359	0.0497806
LOC108695696	31.6135	-0.00594015	0.5256	-0.0113017	0.990983	0.996899
LOC108695697	2.82307	-1.22161	1.85803	-0.657479	0.510873	1
LOC108695700	164.9	-0.0213172	0.322667	-0.0660657	0.947326	0.979975	X
LOC108695703	89.8278	0.0310205	0.395814	0.0783714	0.937533	0.975172
LOC108695704	2.37907	0.848883	1.73905	0.48813	0.625458	1
LOC108695711	11.8484	-0.255243	0.639888	-0.398888	0.689976	0.852198
LOC108695735	507.235	-0.00548052	0.15124	-0.0362372	0.971093	0.990205
LOC108695739	1.05961	0.841672	2.98267	0.282187	0.7778	1
LOC108695740	508.264	0.213419	0.143955	1.48254	0.138197	0.343216
LOC108695745	1.04147	1.10122	2.35887	0.466843	0.640612	1
LOC108695753	47.2745	-0.314388	0.39101	-0.804042	0.421373	0.667014
LOC108695754	3.2644	0.335634	1.44939	0.231569	0.816873	1
LOC108695756	95.4676	0.608842	0.286149	2.12771	0.0333612	0.131292
LOC108695757	872.043	0.252403	0.151628	1.66462	0.095988	0.268839
LOC108695758	26.6577	1.36785	0.505003	2.70861	0.00675663	0.0412564
LOC108695759	77.473	0.760745	0.416219	1.82775	0.0675872	0.213092
LOC108695761	116.444	-0.324519	0.259889	-1.24869	0.21178	0.447732
LOC108695762	44.3601	1.54289	1.31623	1.17221	0.241114	0.485127
LOC108695763	2.05838	0.261156	1.9525	0.133754	0.893597	1
LOC108695764	8.55684	1.07854	1.04109	1.03597	0.300215	0.550864
LOC108695772	8.80162	6.054	1.54937	3.9074	9.32958e-05	0.00139815
LOC108695774	1185.13	-0.0782002	0.200094	-0.390818	0.695932	0.855215
LOC108695775	1.86096	-0.341925	1.93984	-0.176264	0.860086	1
LOC108695776	1.38907	2.67675	2.79727	0.956913	0.338611	1
LOC108695777	368.463	-0.506708	0.176368	-2.87302	0.00406563	0.0282874
LOC108695781	121.867	0.0153471	0.248587	0.0617372	0.950772	0.981458
LOC108695782	4.42793	-1.03186	1.26728	-0.814231	0.415512	0.662316
LOC108695783	33.7202	-0.53699	0.524274	-1.02426	0.305715	0.556444
LOC108695785	35.2152	-1.41732	0.449321	-3.15436	0.00160853	0.0139416
LOC108695787	360.575	-0.140526	0.204837	-0.686039	0.492688	0.724678		X
LOC108695788	1.167	3.82563	2.49279	1.53467	0.124864	1
LOC108695789	267.454	-0.160726	0.176679	-0.909705	0.362978	0.613179
LOC108695795	129.635	-0.402577	0.255043	-1.57846	0.114459	0.302796
LOC108695797	134.139	0.92368	0.36474	2.53244	0.0113272	0.06045
LOC108695798	2.3228	1.79209	1.86483	0.960996	0.336554	1
LOC108695799	24.2521	0.680699	0.490264	1.38843	0.165005	0.384887
LOC108695803	7.90529	2.37935	1.20741	1.97063	0.0487666	0.170808
LOC108695804	119.945	0.0203328	0.247497	0.0821539	0.934524	0.97432
LOC108695805	1.84275	-0.710702	1.89008	-0.376017	0.706904	1
LOC108695807	6.5819	-0.342178	0.900475	-0.379997	0.703947	0.858945
LOC108695808	1.5201	-4.33059	2.93859	-1.4737	0.140563	1
LOC108695812	4.24856	-1.99923	1.40577	-1.42216	0.154981	0.369812
LOC108695813	583.328	0.894345	0.148832	6.00908	1.86577e-09	1.24315e-07
LOC108695814	1655.65	-0.427614	0.160207	-2.66914	0.00760462	0.0451695
LOC108695815	25.2401	0.90851	0.512934	1.7712	0.0765269	0.232677
LOC108695816	6.84843	2.37603	0.997099	2.38295	0.0171746	0.0817386
LOC108695817	22.7539	-0.830428	0.61258	-1.35562	0.175219	0.399193
LOC108695821	1.73476	3.30825	2.4276	1.36277	0.172956	1
LOC108695822	14.9564	-1.83876	0.785831	-2.3399	0.019289	0.089134
LOC108695826	1.40495	3.895	2.57495	1.51265	0.130368	1
LOC108695829	4.3175	-0.442915	1.14875	-0.385565	0.699819	0.857015
LOC108695830	3.83392	3.44196	1.97245	1.74502	0.0809815	0.241052
LOC108695831	1.96901	3.29182	2.31447	1.42227	0.154947	1
LOC108695832	0.989438	3.97197	2.909	1.36541	0.172125	1
LOC108695833	7.15737	1.91989	1.00749	1.9056	0.0567016	0.189803
LOC108695837	7.56547	0.904651	0.940343	0.962044	0.336028	0.58762
LOC108695839	1.63744	3.06296	2.35111	1.30277	0.192652	1
LOC108695843	5.26684	-1.18336	1.22483	-0.966141	0.333974	0.585522
LOC108695845	105.856	-0.508005	1.43273	-0.354573	0.72291	0.870601
LOC108695846	1.4427	2.24635	2.68881	0.835445	0.403467	1
LOC108695859	1.03137	3.74215	3.15938	1.18446	0.236232	1
LOC108695860	1.15396	1.25078	3.14608	0.397568	0.690949	1
LOC108695861	5.52774	-0.742974	1.01558	-0.731578	0.464426	0.702374
LOC108695864	1.05842	1.6617	3.15053	0.527437	0.59789	1
LOC108695879	0.972681	0.481058	2.9994	0.160384	0.872578	1
LOC108695884	1.04049	3.25756	3.27757	0.993893	0.320275	1
LOC108695886	4.43974	3.10314	1.77176	1.75145	0.0798683	0.238915
LOC108695890	9.29397	-0.670908	1.26529	-0.530243	0.595944	0.796658
LOC108695891	1.63002	0.332606	2.08336	0.159649	0.873158	1
LOC108695892	1.1809	3.04131	3.05672	0.994957	0.319757	1
LOC108695894	49.2017	0.858638	0.420978	2.03963	0.0413874	0.152554
LOC108695895	5.34892	2.22575	1.28062	1.73802	0.0822078	0.243443
LOC108695899	4.93431	2.39801	1.1281	2.12571	0.0335278	0.13166
LOC108695901	443.855	0.100537	0.186334	0.539555	0.589504	0.792522
LOC108695902	2.73091	1.43632	1.74347	0.823828	0.410037	1
LOC108695903	1.98454	4.62337	2.34891	1.96831	0.0490329	1
LOC108695904	2.91363	1.97642	1.79655	1.10012	0.27128	1
LOC108695906	728.244	0.823691	0.408674	2.01552	0.04385	0.158825
LOC108695907	1.40376	-1.89951	3.26901	-0.581067	0.561196	1
LOC108695912	894.605	-0.499757	0.147451	-3.38932	0.00070067	0.00724667
LOC108695919	3.17541	0.411376	1.7598	0.233763	0.815169	1
LOC108695920	1.24514	0.0826068	2.90083	0.028477	0.977282	1
LOC108695921	1.4621	0.587426	2.43932	0.240815	0.809698	1
LOC108695922	2.42795	1.94004	1.72553	1.12431	0.260881	1
LOC108695923	1.22114	1.29067	2.51026	0.514157	0.607142	1
LOC108695931	41.4324	3.12079	0.548798	5.6866	1.29595e-08	7.025e-07
LOC108695940	1.66055	-0.567974	1.87796	-0.302443	0.762315	1
LOC108695944	2.69682	2.27053	1.86112	1.21998	0.222473	1
LOC108695949	4.1441	3.77136	1.97901	1.90567	0.0566925	0.189803
LOC108695950	1.31004	3.61567	3.14461	1.1498	0.250227	1
LOC108695955	1.7253	2.00613	2.30509	0.870307	0.384133	1
LOC108695959	2.07507	3.39113	2.31555	1.4645	0.143056	1
LOC108695960	1455.14	-0.0105726	0.327724	-0.0322606	0.974264	0.991194
LOC108695961	149.62	-0.525999	0.222176	-2.36749	0.0179094	0.0843823
LOC108695962	446.521	0.45446	0.184796	2.45925	0.0139228	0.07016
LOC108695965	706.584	0.259642	0.220765	1.1761	0.239555	0.482969
LOC108695967	5.24897	-2.77741	1.36496	-2.0348	0.0418715	0.153689
LOC108695968	1.58985	-4.68202	2.65506	-1.76343	0.0778273	1
LOC108695974	1.90938	-0.946063	2.19624	-0.430764	0.66664	1
LOC108695976	4.1421	0.742838	1.71307	0.43363	0.664557	0.838753
LOC108695982	3.69114	0.172274	1.22231	0.140941	0.887916	1
LOC108695983	188.52	-0.113409	0.212531	-0.53361	0.593611	0.795424
LOC108695984	0.861752	3.20134	3.7265	0.859074	0.3903	1
LOC108695989	45.4897	-0.258297	0.432966	-0.596576	0.55079	0.766093
LOC108695990	40.7015	1.47493	0.5627	2.62117	0.00876296	0.0501067
LOC108695991	30.974	0.476352	0.464	1.02662	0.304599	0.555192
LOC108695992	17.1613	0.66988	0.622152	1.07672	0.281608	0.530796
LOC108695993	4.92463	1.74439	1.1794	1.47905	0.139126	0.344897
LOC108696000	4.09449	-0.985059	1.76446	-0.558278	0.576655	0.783832
LOC108696003	5.16354	-2.38661	1.33451	-1.78838	0.0737154	0.226836
LOC108696004	1.34166	-0.0880142	2.24107	-0.0392732	0.968673	1
LOC108696005	3.35233	-0.527773	1.57639	-0.334798	0.737778	1
LOC108696007	32.6712	-0.0500471	0.440125	-0.113711	0.909467	0.962996
LOC108696008	2.40089	-2.39311	1.82956	-1.30802	0.190866	1
LOC108696012	321.625	0.492455	0.170933	2.88099	0.0039643	0.0277366
LOC108696013	66.149	0.189728	0.34742	0.546105	0.584994	0.789352
LOC108696014	298.172	-0.127261	0.223245	-0.570049	0.568645	0.777867
LOC108696016	380.835	-0.10934	0.182927	-0.597727	0.550022	0.765509
LOC108696019	1.94463	-0.372768	2.15269	-0.173164	0.862522	1
LOC108696020	57.0056	-0.544362	0.366295	-1.48613	0.137244	0.341674
LOC108696022	276.874	-0.350982	0.226166	-1.55188	0.120692	0.313816		X
LOC108696023	8.83362	-0.217076	0.850128	-0.255346	0.798456	0.909992
LOC108696024	5.8854	1.70182	1.07367	1.58505	0.112954	0.300238
LOC108696025	8.54351	3.02194	0.908922	3.32475	0.000884993	0.00874781
LOC108696027	1.00281	-0.12501	2.50132	-0.0499776	0.96014	1
LOC108696028	1.16817	0.825371	3.27108	0.252324	0.800791	1
LOC108696029	6.34515	0.38573	1.1099	0.347536	0.728189	0.873129
LOC108696035	6.98636	1.58308	1.10329	1.43487	0.151325	0.364191
LOC108696037	2.04371	4.47247	2.29773	1.94648	0.0515974	1
LOC108696040	1.32884	0.184137	2.35897	0.078058	0.937782	1
LOC108696045	229.602	0.975456	0.282938	3.44759	0.000565609	0.00608616
LOC108696047	6.38778	-0.758057	0.878401	-0.862996	0.38814	0.637538
LOC108696053	9.4988	0.0886173	0.94889	0.0933905	0.925593	0.970469
LOC108696054	3.89942	2.06957	1.45578	1.42163	0.155135	0.370137
LOC108696056	6.74788	-3.23781	1.32695	-2.44004	0.0146857	0.0729695
LOC108696057	48.8684	-0.113603	0.428411	-0.265174	0.790875	0.905836
LOC108696061	53.8273	-0.578158	0.366129	-1.57911	0.114311	0.302532
LOC108696065	7.5689	0.259213	1.13056	0.229278	0.818653	0.919862
LOC108696066	41.2707	0.669307	0.392928	1.70338	0.0884964	0.25552
LOC108696067	67.783	-1.46516	0.385749	-3.79822	0.000145741	0.0020256		X
LOC108696071	239.438	0.488012	0.22045	2.21371	0.0268489	0.112929
LOC108696073	8.53207	1.78851	0.924355	1.93487	0.0530059	0.181073
LOC108696074	985.838	0.533952	0.154609	3.45358	0.000553205	0.00598401
LOC108696075	111.408	0.621536	0.274067	2.26782	0.02334	0.102065
LOC108696078	2508.32	0.0768495	0.137965	0.557021	0.577513	0.78448
LOC108696085	53.9707	-0.156894	0.414161	-0.378824	0.704818	0.859348
LOC108696087	417.708	0.0391599	0.207937	0.188326	0.850621	0.934621
LOC108696088	2.25574	2.75746	1.84696	1.49297	0.135445	1
LOC108696090	2.77866	-1.77268	1.60312	-1.10577	0.268826	1
LOC108696093	2.52773	-2.10873	1.81719	-1.16043	0.245873	1
LOC108696096	621.505	0.373938	0.132847	2.8148	0.0048808	0.0322075
LOC108696099	42.675	0.675732	0.384671	1.75665	0.0789776	0.237172
LOC108696100	2.93386	0.253897	1.52707	0.166264	0.867949	1
LOC108696102	10.4495	0.57461	0.998277	0.575602	0.564884	0.775598
LOC108696103	230.125	-0.205599	0.233691	-0.879788	0.378974	0.628583
LOC108696107	135.438	-0.425791	0.309073	-1.37764	0.168315	0.389045
LOC108696109	210.418	0.529411	0.239911	2.2067	0.0273352	0.114346
LOC108696110	412.872	0.73507	0.203504	3.61206	0.000303777	0.00367546		X
LOC108696111	251.539	-0.231351	0.18652	-1.24036	0.214843	0.452017
LOC108696112	12.8446	-0.893328	0.859163	-1.03976	0.298449	0.549726
LOC108696113	1.53277	2.76076	2.23525	1.2351	0.216793	1
LOC108696115	1.30954	-3.37631	2.77664	-1.21597	0.223997	1
LOC108696118	152.131	-0.043361	0.243849	-0.177819	0.858865	0.938621
LOC108696120	17.3223	0.0825728	0.645701	0.127881	0.898243	0.958059
LOC108696123	1.23467	0.249225	2.34135	0.106445	0.915229	1
LOC108696134	489.869	0.267402	0.145526	1.83748	0.0661391	0.21015
LOC108696138	350.844	0.563644	0.213998	2.63387	0.00844179	0.0487244
LOC108696140	10.058	-1.13906	0.856579	-1.32977	0.183592	0.410573
LOC108696141	1.98002	-0.55502	1.67476	-0.331403	0.74034	1
LOC108696143	465.492	0.0870978	0.187275	0.465079	0.641875	0.825919
LOC108696145	268.254	-0.13356	0.223215	-0.598347	0.549608	0.765394
LOC108696147	6.22949	1.96561	1.15711	1.69872	0.0893711	0.257016
LOC108696153	1.09599	2.76111	2.67988	1.03031	0.302865	1
LOC108696154	4.04079	3.42483	1.54525	2.21636	0.0266671	0.112467
LOC108696160	769.033	-0.982318	0.133949	-7.33353	2.24166e-13	3.17852e-11
LOC108696161	5.46084	-1.62537	1.23828	-1.3126	0.189316	0.418509
LOC108696163	117.357	-0.738064	0.312319	-2.36317	0.0181193	0.0850668
LOC108696164	24.674	0.54747	0.638727	0.857128	0.391374	0.641314
LOC108696165	3.07508	0.51726	1.4177	0.364859	0.715217	1
LOC108696166	416.169	0.651862	0.445518	1.46315	0.143425	0.351686
LOC108696170	5.31696	2.03769	1.1209	1.81791	0.0690785	0.216384
LOC108696172	3.02049	2.59392	1.8147	1.42939	0.152891	1		X
LOC108696173	157.225	0.29262	0.252233	1.16012	0.246001	0.490746
LOC108696174	26.3692	-0.513172	0.517332	-0.991958	0.321218	0.572717
LOC108696176	59.3989	1.1648	0.389098	2.99359	0.00275719	0.0213055
LOC108696179	2.98742	0.965109	1.35188	0.713903	0.475287	1
LOC108696180	67.5385	-1.08207	0.362236	-2.98718	0.0028156	0.021658		X
LOC108696181	6.6352	-1.29364	1.05093	-1.23094	0.218345	0.456537
LOC108696184	1168.63	0.0518481	0.144723	0.358257	0.720151	0.869169
LOC108696188	1.73385	-1.50643	2.72707	-0.552399	0.580675	1
LOC108696191	81.0827	0.18733	0.320763	0.584014	0.559211	0.771858
LOC108696194	189.756	0.149859	0.242622	0.617663	0.536798	0.75519
LOC108696196	192.448	-0.458732	0.217518	-2.10893	0.0349502	0.135453
LOC108696198	1.01748	-0.0546167	2.68338	-0.0203537	0.983761	1
LOC108696199	4.2091	0.557624	1.30485	0.427348	0.669126	0.841899
LOC108696204	158.82	0.640392	0.234781	2.72761	0.00637941	0.0395317
LOC108696207	10.688	-0.0166027	0.927666	-0.0178973	0.985721	0.994776	X
LOC108696208	22.0283	0.171883	0.564675	0.304393	0.760828	0.890231
LOC108696209	7.49951	0.679596	1.05221	0.645877	0.518359	0.741721
LOC108696210	34.8247	1.37009	1.17448	1.16655	0.243391	0.487998
LOC108696211	31.3158	-0.36817	0.489146	-0.752678	0.451643	0.692481
LOC108696212	52.7268	0.710038	0.35495	2.00039	0.0454583	0.162887
LOC108696217	2.82088	-0.565655	2.05162	-0.275711	0.78277	1
LOC108696218	15.3609	1.85314	0.804633	2.30308	0.0212742	0.0956659
LOC108696219	4.90436	-0.390235	1.16724	-0.334323	0.738136	0.878972
LOC108696220	40.4322	0.446678	0.606482	0.736507	0.461422	0.700265
LOC108696228	4.66124	0.228291	1.29077	0.176864	0.859615	0.938842
LOC108696235	1566.98	-0.164918	0.11115	-1.48375	0.137876	0.342832
LOC108696237	281.898	-0.383784	0.222198	-1.72721	0.0841292	0.247276
LOC108696238	12.1307	0.369875	0.869531	0.425373	0.670565	0.842604
LOC108696239	51.414	0.0115192	0.42859	0.0268769	0.978558	0.992383
LOC108696241	152.403	-0.255163	0.242844	-1.05073	0.293385	0.544157
LOC108696242	204.426	-0.0455034	0.225989	-0.201352	0.840423	0.929897
LOC108696243	22.3211	0.115023	0.532119	0.21616	0.828863	0.924978
LOC108696244	34.9423	-0.0845092	0.507642	-0.166474	0.867784	0.942972
LOC108696248	1.3444	-1.51497	2.33983	-0.647471	0.517327	1
LOC108696251	650.998	0.984878	0.400893	2.45671	0.0140215	0.0704917
LOC108696253	601.923	-0.322632	0.162113	-1.99016	0.0465732	0.16542
LOC108696254	81.0348	1.70451	0.368731	4.62264	3.7889e-06	9.7549e-05
LOC108696255	7.05254	-0.300465	0.884297	-0.339778	0.734024	0.876795
LOC108696261	1.97448	-0.474859	1.69076	-0.280855	0.778821	1
LOC108696263	224.43	-0.293792	0.219656	-1.33751	0.181057	0.407215	X
LOC108696264	112.714	-0.163373	0.275344	-0.593343	0.552951	0.767524
LOC108696267	8.94448	-0.106844	0.871208	-0.122639	0.902393	0.960227
LOC108696270	19.0427	-0.147679	0.615747	-0.239836	0.810457	0.915391
LOC108696272	8.09036	-1.0696	0.938667	-1.13949	0.254499	0.500543
LOC108696273	2.79477	-1.55766	1.7294	-0.900694	0.367751	1
LOC108696274	1.07354	-3.66694	3.34597	-1.09593	0.273111	1
LOC108696277	9.60629	1.71701	0.803772	2.13619	0.0326636	0.129467
LOC108696279	159.002	-0.389197	0.251998	-1.54445	0.12248	0.316697
LOC108696281	17.6936	3.67281	0.880987	4.16897	3.05973e-05	0.000562396
LOC108696284	7.82088	3.61993	1.22396	2.95755	0.00310092	0.0230996
LOC108696285	1.69825	1.34771	2.4324	0.554067	0.579533	1
LOC108696293	10.3122	2.03718	0.845207	2.41027	0.0159408	0.0773108
LOC108696296	93.4561	-1.29129	0.279721	-4.61634	3.90572e-06	0.000100184
LOC108696297	1.80803	0.29813	1.82808	0.163084	0.870452	1
LOC108696298	2.91229	3.16055	1.71286	1.84519	0.0650101	1
LOC108696299	5.52662	-0.770859	1.01536	-0.759196	0.447735	0.689288
LOC108696300	122.768	0.0828904	0.229093	0.36182	0.717486	0.867407
LOC108696301	3.03261	-1.00676	1.46687	-0.686337	0.4925	1
LOC108696302	1.48298	2.21702	2.82832	0.783865	0.433119	1
LOC108696303	3.71621	-1.45364	1.34085	-1.08412	0.278312	0.527307
LOC108696305	4.14014	0.515334	1.181	0.436353	0.662581	0.837587
LOC108696306	93.2532	0.776204	0.309635	2.50683	0.0121819	0.0636606
LOC108696308	2577.97	-0.298626	0.11394	-2.62091	0.00876962	0.050134
LOC108696309	180.648	0.171799	0.219404	0.783025	0.433612	0.676015
LOC108696310	3.15289	2.25593	1.63946	1.37602	0.168815	1
LOC108696311	11.4006	-0.00531672	0.890696	-0.00596918	0.995237	0.998345
LOC108696313	30.7473	1.62684	0.65296	2.49148	0.0127212	0.0656098
LOC108696315	177.697	0.757094	0.24699	3.06528	0.00217463	0.0177876
LOC108696316	2.52457	1.54266	1.69363	0.910861	0.362368	1
LOC108696319	16.2911	1.93244	0.741942	2.60458	0.00919877	0.0519087
LOC108696320	68.2334	-0.26041	0.31672	-0.82221	0.410958	0.658557
LOC108696321	36.0479	-1.47454	0.450275	-3.27474	0.00105758	0.0100633
LOC108696325	59.0949	-0.0232229	0.526008	-0.0441493	0.964785	0.988208
LOC108696327	6.52492	-0.287406	0.951057	-0.302196	0.762503	0.891349
LOC108696328	211.899	-0.297953	0.20151	-1.4786	0.139246	0.345102
LOC108696331	80.8553	-0.177201	0.333015	-0.532109	0.59465	0.795981
LOC108696333	5.38389	1.38005	1.15044	1.19958	0.230303	0.471282
LOC108696334	146.747	0.568373	0.217143	2.6175	0.00885759	0.0505065
LOC108696336	1.82164	4.1183	2.26744	1.81628	0.0693276	1
LOC108696337	15.173	0.899494	0.847497	1.06135	0.288529	0.538553
LOC108696340	16.4431	2.53449	0.744145	3.40591	0.000659451	0.00689982
LOC108696349	69.5798	0.440555	0.363373	1.21241	0.225357	0.465397
LOC108696353	2.7993	0.172083	1.51213	0.113802	0.909395	1
LOC108696354	2.78501	0.532263	1.81363	0.293479	0.769156	1
LOC108696357	166.146	0.127024	0.259058	0.490328	0.623902	0.814994
LOC108696358	285.368	0.22993	0.190913	1.20437	0.228446	0.469082
LOC108696359	161.338	-0.414653	0.267708	-1.5489	0.121406	0.314792
LOC108696362	1.87956	3.44767	2.01461	1.71134	0.0870191	1
LOC108696366	457.169	0.825258	0.205524	4.01539	5.93488e-05	0.000976727
LOC108696368	276.112	0.114427	0.198668	0.575973	0.564633	0.775438
LOC108696370	5.50564	1.06313	1.03889	1.02334	0.306148	0.556947
LOC108696372	4.69223	-0.823296	1.18171	-0.696699	0.485991	0.718958
LOC108696374	324.027	-0.108847	0.194556	-0.559465	0.575845	0.78336
LOC108696377	437.528	0.136768	0.174965	0.781691	0.434396	0.676532
LOC108696379	858.714	0.101826	0.142372	0.71521	0.474479	0.709923		X
LOC108696380	26.0719	0.441797	0.494405	0.893592	0.37154	0.621732
LOC108696382	35.371	-1.11147	0.410586	-2.70702	0.00678892	0.0413659
LOC108696383	1.18247	-2.46147	3.04694	-0.80785	0.419177	1
LOC108696384	19.616	-1.06079	0.593335	-1.78784	0.0738021	0.227054
LOC108696387	1.42068	0.729718	2.47318	0.295053	0.767954	1
LOC108696388	6.41154	0.564358	0.994105	0.567705	0.570236	0.779006
LOC108696390	1.52622	4.23725	2.52038	1.6812	0.0927244	1
LOC108696394	64.0573	-0.579316	0.444692	-1.30274	0.192665	0.423058
LOC108696396	4.02525	-0.547086	1.37672	-0.397384	0.691084	0.8529
LOC108696399	52.6425	0.917053	0.425706	2.15419	0.031225	0.125318
LOC108696402	713.728	-0.566581	0.164652	-3.44109	0.000579373	0.0061972
LOC108696403	173.313	-0.315047	0.216901	-1.45249	0.146364	0.355995
LOC108696405	135.301	0.750853	0.252462	2.97413	0.00293825	0.022251
LOC108696406	1.15764	-2.32541	3.44067	-0.675858	0.499131	1
LOC108696408	3.57291	0.902337	1.12585	0.801474	0.422857	1
LOC108696410	0.943259	1.31566	3.30329	0.398288	0.690418	1
LOC108696412	13.9598	2.53802	0.851632	2.98018	0.00288078	0.0219958
LOC108696416	115.743	0.525512	0.281523	1.86668	0.0619466	0.201306		X
LOC108696417	51.2583	1.79155	0.3893	4.60197	4.1851e-06	0.000105949
LOC108696418	59.7986	-0.014508	0.34738	-0.041764	0.966687	0.988756
LOC108696419	50.2946	0.828335	0.393963	2.10257	0.0355036	0.136915
LOC108696420	1.48162	-0.0361623	2.32283	-0.0155682	0.987579	1
LOC108696423	4.85709	-0.455883	1.07936	-0.422363	0.67276	0.843742
LOC108696425	604.143	-0.0309812	0.184322	-0.168082	0.866519	0.942341
LOC108696426	2.25785	-1.04153	1.93144	-0.53925	0.589714	1
LOC108696429	97.7652	-0.326619	0.309868	-1.05406	0.291857	0.542419
LOC108696431	16.4807	-1.07224	0.692599	-1.54814	0.121589	0.315141
LOC108696441	16.7313	-1.0823	0.686763	-1.57594	0.115039	0.303759
LOC108696447	413.949	-0.432724	0.210638	-2.05435	0.0399417	0.148519
LOC108696448	131.621	0.0556025	0.26408	0.210552	0.833237	0.927086
LOC108696452	6.50263	0.258349	1.34526	0.192043	0.847708	0.933131
LOC108696457	667.052	0.656021	0.216676	3.02766	0.00246454	0.0195803
LOC108696459	1033.47	0.33445	0.140125	2.3868	0.0169957	0.0810699
LOC108696471	364.608	0.00607278	0.198553	0.0305851	0.9756	0.99151
LOC108696472	1233.59	0.243021	0.190432	1.27615	0.201901	0.435254
LOC108696474	14.4895	0.324723	0.847774	0.38303	0.701698	0.857943
LOC108696475	3.92855	0.763059	1.61662	0.47201	0.63692	0.823553
LOC108696479	2.57321	1.73729	1.91682	0.906344	0.364754	1
LOC108696481	2.80935	-3.08747	2.02132	-1.52746	0.126648	1
LOC108696483	13.1029	0.495728	0.679444	0.729608	0.46563	0.703479
LOC108696484	408.236	-0.571444	0.184879	-3.0909	0.0019955	0.0166056		X
LOC108696485	2.16185	1.14088	1.6762	0.680635	0.496103	1
LOC108696486	37.8119	-0.0870754	0.45719	-0.190458	0.84895	0.933946
LOC108696489	6.71347	1.42002	1.05194	1.3499	0.177047	0.401434
LOC108696494	2.65916	-0.737688	1.97719	-0.373099	0.709075	1
LOC108696498	1.01321	-0.543261	2.59805	-0.209103	0.834368	1
LOC108696500	11.2742	0.196672	0.672531	0.292436	0.769953	0.89505
LOC108696501	1.15471	-0.828996	2.66446	-0.31113	0.755701	1
LOC108696502	1.47859	2.28078	2.59631	0.878473	0.379687	1
LOC108696503	2.74234	-1.99373	1.80383	-1.10527	0.269041	1
LOC108696504	13.6082	-0.362621	0.768702	-0.471732	0.637118	0.823557
LOC108696506	53.8825	-0.575094	0.457939	-1.25583	0.209177	0.444417
LOC108696514	1.7693	-0.0899347	2.10548	-0.0427147	0.965929	1
LOC108696515	313.274	-0.613518	0.200146	-3.06535	0.00217413	0.0177876
LOC108696519	36.0361	0.255315	0.470495	0.542651	0.58737	0.790819
LOC108696520	5.61427	-0.331795	1.07407	-0.308914	0.757387	0.888648
LOC108696525	1622.81	0.307408	0.147043	2.09061	0.0365634	0.139803
LOC108696527	1.68589	0.414305	2.53299	0.163564	0.870075	1
LOC108696529	227.48	-0.21079	0.211873	-0.994888	0.319791	0.571198
LOC108696531	761.012	0.102608	0.215622	0.475872	0.634166	0.8218
LOC108696532	1.63747	0.526326	2.21959	0.237127	0.812558	1
LOC108696533	2.11576	-0.118972	1.92708	-0.0617372	0.950772	1
LOC108696537	26.4838	2.09847	0.586782	3.57623	0.000348579	0.00412561
LOC108696538	628.939	-0.119954	0.152981	-0.784108	0.432977	0.675784
LOC108696539	18.5538	-0.0412775	0.688908	-0.0599172	0.952222	0.981943
LOC108696540	302.718	-0.0815632	0.235047	-0.347008	0.728585	0.873234
LOC108696548	5.07481	0.914166	1.37266	0.665983	0.505422	0.732494
LOC108696549	178.092	0.108512	0.245849	0.441377	0.65894	0.835385
LOC108696551	2.84166	-3.40065	1.99783	-1.70217	0.0887242	1
LOC108696552	137.923	-0.151079	0.235854	-0.640564	0.521806	0.74399
LOC108696554	310.858	0.219628	0.21336	1.02938	0.303303	0.553706
LOC108696555	173.842	-0.678716	0.215881	-3.14394	0.0016669	0.014366
LOC108696556	27.6982	2.78125	0.606864	4.58299	4.58384e-06	0.000114136
LOC108696557	272.642	-0.474678	0.209001	-2.27117	0.0231367	0.10153
LOC108696560	228.389	-0.282738	0.250699	-1.1278	0.259404	0.506036
LOC108696561	663.584	-0.0895232	0.119822	-0.747133	0.454983	0.695019
LOC108696562	1.65206	-0.195594	2.31342	-0.0845478	0.932621	1
LOC108696563	221.2	0.827054	0.220737	3.74678	0.000179118	0.00240697
LOC108696566	5.05313	0.808947	1.4623	0.553202	0.580125	0.785982
LOC108696568	15.7244	0.127069	0.677947	0.187432	0.851322	0.93497
LOC108696570	261.966	-0.0375986	0.187844	-0.200159	0.841357	0.930409
LOC108696575	1.30977	2.20383	2.34434	0.940067	0.347183	1
LOC108696576	1.21482	-2.46011	3.12493	-0.787251	0.431135	1
LOC108696581	78.1145	0.169003	0.34519	0.489593	0.624422	0.815261
LOC108696584	35.1202	2.17976	0.639002	3.4112	0.000646777	0.00679943
LOC108696586	2.53147	0.791414	1.4459	0.547352	0.584137	1
LOC108696587	27.7651	-1.29481	0.520358	-2.48831	0.0128351	0.065996
LOC108696590	40.3594	1.1601	0.528049	2.19696	0.028023	0.116323
LOC108696592	42.0889	1.87868	0.539831	3.48012	0.000501197	0.00553373
LOC108696593	69.991	0.156221	0.340968	0.45817	0.64683	0.829041
LOC108696594	149.483	-0.03033	0.209777	-0.144582	0.885041	0.952301
LOC108696606	5.64878	0.142533	1.12217	0.127015	0.898928	0.958324
LOC108696608	2.45719	3.63094	2.08828	1.73872	0.0820835	1
LOC108696610	536.814	-0.022554	0.157563	-0.143143	0.886177	0.95299
LOC108696613	102.823	0.492534	0.340529	1.44638	0.148072	0.358974
LOC108696618	182.435	-0.204868	0.197387	-1.0379	0.299318	0.55034
LOC108696619	745.91	0.477765	0.15783	3.02709	0.00246917	0.0196062
LOC108696620	285.085	-0.020772	0.208172	-0.099783	0.920517	0.968314
LOC108696623	200.946	-0.395353	0.226357	-1.74659	0.0807086	0.240687
LOC108696628	7.44257	0.451428	1.06991	0.421931	0.673076	0.843952
LOC108696629	81.6729	-0.0834404	0.348674	-0.239308	0.810867	0.915714
LOC108696632	1.11411	-2.26093	2.35261	-0.961033	0.336535	1
LOC108696634	1.11852	-2.91902	3.08633	-0.945791	0.344255	1
LOC108696636	224.17	-0.0589789	0.212611	-0.277403	0.781471	0.90116
LOC108696639	8.41687	-1.99753	1.1312	-1.76586	0.0774198	0.234278
LOC108696640	2.45322	1.50022	2.28353	0.656975	0.511197	1
LOC108696642	1.63197	2.69235	2.55621	1.05326	0.292223	1
LOC108696645	12.9869	0.302522	0.674184	0.448723	0.653631	0.832951
LOC108696650	8.03804	-5.35649	1.71106	-3.1305	0.00174509	0.0149282
LOC108696651	3.20185	0.852549	1.37356	0.620687	0.534806	1
LOC108696652	4.03649	0.989632	1.39384	0.710006	0.477701	0.712664
LOC108696656	755.462	-0.135692	0.180162	-0.753164	0.451351	0.692152
LOC108696658	1.8143	0.831194	2.24194	0.370748	0.710826	1
LOC108696659	27.01	-0.0599325	0.562975	-0.106457	0.91522	0.965607
LOC108696660	12.1982	-0.210607	0.83782	-0.251375	0.801524	0.911428
LOC108696663	6.28274	2.96135	1.18793	2.49286	0.0126718	0.0654604
LOC108696666	3.13455	2.172	1.9243	1.12872	0.259016	1
LOC108696667	55.8675	2.92262	0.585152	4.99464	5.89452e-07	1.95921e-05
LOC108696673	98.9	-0.272176	0.275374	-0.988388	0.322963	0.574631
LOC108696676	1.90936	3.15904	2.04739	1.54296	0.122841	1
LOC108696677	30.9508	-1.58196	0.581252	-2.72164	0.00649585	0.039995
LOC108696681	4.94337	0.273212	1.01893	0.268137	0.788594	0.904662
LOC108696683	77.6983	0.242729	0.346331	0.700859	0.483391	0.716818
LOC108696684	1.48128	4.34264	2.59093	1.67609	0.0937201	1		X
LOC108696685	1.32874	-0.833119	2.91509	-0.285795	0.775035	1
LOC108696688	1.6795	4.63109	2.35433	1.96705	0.0491771	1
LOC108696689	359.078	-0.197067	0.216409	-0.910624	0.362493	0.612792
LOC108696690	6.69355	0.942909	1.22236	0.771381	0.440481	0.68184
LOC108696692	1.70372	0.904337	2.11966	0.426642	0.66964	1
LOC108696695	110.449	0.0534649	0.294477	0.181559	0.855929	0.937395
LOC108696697	26.2053	-0.308685	0.48831	-0.63215	0.527289	0.748306
LOC108696698	4.17788	0.53398	1.52234	0.350763	0.725766	0.87222
LOC108696704	10.4209	-0.000730213	0.78205	-0.000933716	0.999255	0.999741
LOC108696707	0.966924	3.29281	3.18408	1.03415	0.301067	1
LOC108696709	581.723	-0.20623	0.152878	-1.34899	0.177341	0.401651
LOC108696712	2.25966	2.29071	2.01723	1.13557	0.256136	1
LOC108696713	247.244	0.466165	0.203759	2.28783	0.0221475	0.0984092
LOC108696714	4.95204	-0.945396	1.10699	-0.854024	0.393092	0.642933
LOC108696715	7.6534	-3.31463	1.23997	-2.67315	0.0075143	0.0447531
LOC108696717	2.91539	-1.82529	1.52098	-1.20007	0.230111	1
LOC108696718	2.1559	-0.700843	1.87994	-0.372801	0.709297	1
LOC108696719	7.30172	3.02989	1.27572	2.37504	0.0175473	0.0830725
LOC108696725	134.393	-0.075085	0.332451	-0.225852	0.821316	0.921452
LOC108696729	55.8913	-0.302553	0.355802	-0.850342	0.395135	0.644504		X
LOC108696730	69.0079	-0.887926	0.327758	-2.70909	0.00674676	0.0412136
LOC108696736	2.08167	-0.857308	1.89719	-0.451884	0.651352	1
LOC108696737	3.25939	0.419989	1.37521	0.305399	0.760062	1
LOC108696741	94.2091	-0.586046	0.381204	-1.53735	0.124206	0.319623
LOC108696742	40.3883	0.0197643	0.416826	0.0474161	0.962182	0.986928
LOC108696743	127.201	-0.179671	0.314558	-0.571185	0.567874	0.77733
LOC108696744	32.5113	-1.11788	0.4908	-2.27767	0.0227463	0.10028
LOC108696748	1.02771	1.63078	3.46276	0.470948	0.637678	1
LOC108696749	0.996689	-1.09816	3.55548	-0.308865	0.757424	1
LOC108696750	1.33642	0.0736278	2.35293	0.0312919	0.975037	1
LOC108696752	3.044	-1.24144	1.73349	-0.716149	0.473899	1
LOC108696757	3.09567	-2.06435	1.49244	-1.38321	0.1666	1
LOC108696758	309.076	-0.669081	0.200611	-3.33521	0.000852359	0.0084982
LOC108696759	1.734	0.169446	2.02307	0.0837566	0.93325	1
LOC108696761	2.27385	2.74325	1.75667	1.56162	0.118378	1
LOC108696763	103.384	-0.694843	0.325899	-2.13208	0.0330001	0.130291
LOC108696765	308.75	-0.0829083	0.205069	-0.404294	0.685996	0.850483
LOC108696771	267.973	0.739024	0.241968	3.05423	0.00225641	0.0183005
LOC108696772	6.41919	1.79442	1.06279	1.6884	0.0913346	0.260269
LOC108696775	82.8757	0.854493	0.328338	2.60248	0.00925522	0.0521539
LOC108696776	313.593	0.165055	0.19813	0.833067	0.404807	0.65343
LOC108696777	248.959	0.0513455	0.188718	0.272075	0.785564	0.903058
LOC108696778	454.752	0.0280625	0.175688	0.15973	0.873094	0.94573
LOC108696780	3.13116	2.02125	1.63172	1.23872	0.215449	1
LOC108696781	192.259	0.376472	0.239672	1.57078	0.116234	0.305877
LOC108696783	67.2838	2.3027	0.371595	6.19681	5.76176e-10	4.167e-08	X
LOC108696784	170.734	0.518996	0.269242	1.92762	0.0539028	0.183035
LOC108696785	6.73546	1.51993	1.07359	1.41574	0.156851	0.372323
LOC108696787	1074.75	-0.418128	0.142102	-2.94245	0.00325629	0.0239655
LOC108696788	19.3068	1.22597	0.645082	1.90049	0.0573686	0.191078
LOC108696794	1.91249	-5.29749	2.22113	-2.38504	0.0170773	1
LOC108696797	1.54325	-0.391622	2.14344	-0.182707	0.855028	1
LOC108696798	63.6879	0.0171728	0.351624	0.0488387	0.961048	0.986477	X
LOC108696800	558.951	0.36097	0.174344	2.07045	0.0384105	0.144876	X
LOC108696802	5.22886	-1.06601	1.45111	-0.734617	0.462573	0.700983
LOC108696803	16.8093	-0.00920666	0.60572	-0.0151995	0.987873	0.995726
LOC108696804	370.962	4.08105	0.299801	13.6125	3.37299e-42	7.46831e-39
LOC108696805	314.65	-0.168948	0.169003	-0.999673	0.317469	0.568421
LOC108696811	133.712	4.75344	0.485194	9.79701	1.15972e-22	5.85636e-20
LOC108696814	2.6521	0.739074	2.06632	0.357675	0.720586	1
LOC108696815	1.92294	-1.09795	2.37997	-0.461329	0.644563	1
LOC108696816	2.87462	1.27789	1.87767	0.680573	0.496142	1
LOC108696817	3.77647	0.68108	1.54808	0.43995	0.659973	0.83601
LOC108696818	5.48413	1.61699	1.13064	1.43016	0.152671	0.366298
LOC108696820	1.91332	1.13427	1.96895	0.576078	0.564562	1
LOC108696822	1.31111	0.825381	3.14775	0.262213	0.793157	1
LOC108696824	1020.12	-0.0305459	0.145566	-0.209842	0.833791	0.927351
LOC108696825	2.42204	1.44575	1.84029	0.785612	0.432095	1
LOC108696830	5.7403	0.065784	1.14605	0.0574005	0.954226	0.983157
LOC108696831	2.02634	3.0318	2.15408	1.40746	0.15929	1
LOC108696832	11.6916	-0.880021	0.702769	-1.25222	0.21049	0.446119
LOC108696834	331.787	0.478626	0.261807	1.82816	0.0675251	0.213025
LOC108696836	362.586	-0.00543876	0.277095	-0.0196278	0.98434	0.994527
LOC108696837	25.4348	-0.417564	0.505943	-0.825318	0.409191	0.656991
LOC108696839	257.821	-0.272246	0.19197	-1.41817	0.156141	0.371282
LOC108696841	87.3187	0.158964	0.341083	0.466056	0.641176	0.825556
LOC108696842	1.03406	-0.466909	2.82771	-0.165119	0.86885	1
LOC108696843	58.8026	1.68632	0.366823	4.59709	4.28429e-06	0.000107702	X
LOC108696844	505.256	0.0328682	0.147983	0.222109	0.824229	0.92285
LOC108696845	11.2049	1.33285	0.838051	1.59041	0.111742	0.298088
LOC108696846	45.2005	0.593067	0.418615	1.41673	0.156561	0.371933
LOC108696848	758.055	0.563561	0.168203	3.35048	0.000806706	0.0081218
LOC108696849	6.81713	0.835134	1.15051	0.72588	0.467912	0.70496
LOC108696851	4.00878	0.833918	1.37403	0.606914	0.543908	0.761138
LOC108696852	264.095	0.139303	0.190163	0.732547	0.463835	0.701873
LOC108696854	1.76282	2.98876	2.57417	1.16106	0.245619	1
LOC108696856	116.039	0.357927	0.298236	1.20015	0.230083	0.470999
LOC108696860	1.50454	-3.36057	2.69829	-1.24544	0.212969	1
LOC108696862	162.932	-0.422876	0.302573	-1.3976	0.162232	0.380734
LOC108696863	1742.37	0.380702	0.112287	3.39043	0.000697839	0.00722539
LOC108696864	41.2789	0.484601	0.484049	1.00114	0.316758	0.567861
LOC108696865	6.23329	-3.19173	1.49923	-2.12892	0.0332611	0.131041
LOC108696873	993.584	-0.179061	0.13475	-1.32885	0.183899	0.410942
LOC108696879	6.2239	0.821833	1.17788	0.697721	0.485352	0.718413
LOC108696880	535.55	0.0557111	0.169778	0.32814	0.742806	0.881433		X
LOC108696881	8.26777	-1.07237	0.889453	-1.20565	0.227953	0.468636
LOC108696882	16.9785	0.113631	0.693504	0.16385	0.869849	0.944001
LOC108696883	3.459	0.446367	1.29981	0.343408	0.731291	1
LOC108696884	3.74849	-0.485456	1.45523	-0.333593	0.738687	0.87917
LOC108696885	7.94079	2.08238	1.13596	1.83315	0.0667797	0.211508
LOC108696886	2.43757	2.59889	1.9473	1.33462	0.182002	1
LOC108696888	7.13251	3.30212	1.27012	2.59986	0.00932612	0.0524468
LOC108696889	59.034	-4.81841	0.629925	-7.64918	2.02272e-14	3.3461e-12
LOC108696890	20.389	-3.79215	0.822095	-4.61279	3.97305e-06	0.000101563
LOC108696891	2.97672	4.34483	2.2875	1.89938	0.0575147	1
LOC108696892	181.808	0.547659	0.244139	2.24322	0.0248825	0.107052
LOC108696893	3.30928	0.537631	1.339	0.401518	0.688039	1
LOC108696895	289.137	-0.822845	0.193615	-4.24991	2.13855e-05	0.000416238
LOC108696896	2.6263	0.321908	1.88258	0.170992	0.86423	1
LOC108696897	1.37368	2.21169	2.29717	0.962792	0.335652	1
LOC108696898	1.51862	3.17385	2.57059	1.23468	0.21695	1
LOC108696899	1.8662	-0.0858659	1.8144	-0.0473247	0.962254	1
LOC108696906	19.0092	1.26499	0.661528	1.91222	0.0558475	0.187728
LOC108696907	3.72761	0.220905	1.47113	0.15016	0.880639	0.949657
LOC108696908	3.15618	1.985	1.37105	1.44779	0.147675	1
LOC108696910	9.33778	1.6655	0.813919	2.04627	0.0407294	0.150688
LOC108696911	20.8591	0.210487	0.549964	0.382729	0.701921	0.858015
LOC108696913	232.72	0.669483	0.285832	2.34223	0.0191689	0.0887498
LOC108696914	4.08087	1.10418	1.5262	0.723485	0.469382	0.70591
LOC108696916	12.4412	3.06289	1.01532	3.01669	0.0025555	0.0201087
LOC108696919	2.83556	-4.11061	2.28604	-1.79814	0.072155	1
LOC108696921	2.02245	2.30996	4.63731	0.498124	0.618397	1
LOC108696930	1.20979	0.656812	2.93335	0.223912	0.822826	1
LOC108696932	1.39072	4.72326	3.17969	1.48545	0.137425	1
LOC108696934	0.959012	4.26482	2.85271	1.49501	0.134912	1
LOC108696936	23.7313	0.741729	0.643672	1.15234	0.249182	0.494412
LOC108696940	120.777	-0.958812	0.293313	-3.26891	0.00107963	0.0102218
LOC108696942	4.90021	-1.42359	1.16682	-1.22006	0.222442	0.461227
LOC108696943	2.89259	0.0262848	1.54491	0.0170138	0.986426	1
LOC108696944	274.542	5.00509	0.675293	7.41173	1.24665e-13	1.86894e-11
LOC108696945	744.097	-3.13078	0.506747	-6.17819	6.48412e-10	4.61836e-08
LOC108696947	48.4665	-0.00636104	0.396014	-0.0160627	0.987184	0.995485
LOC108696948	11.0864	-4.51726	1.17597	-3.84131	0.000122377	0.00175009
LOC108696952	4.05676	-1.52865	1.97526	-0.773895	0.438993	0.680634
LOC108696958	3.50833	-0.245679	1.34204	-0.183063	0.854748	1
LOC108696959	4.5133	-0.985882	1.25266	-0.78703	0.431264	0.67451
LOC108696961	89.3723	0.579258	0.311707	1.85834	0.0631206	0.203776
LOC108696963	1.69214	-1.78777	2.36602	-0.755603	0.449887	1
LOC108696973	1.43474	1.35003	2.61488	0.516286	0.605655	1
LOC108696974	1.38522	3.82418	2.87805	1.32874	0.183934	1
LOC108696986	10.0559	0.240215	0.766453	0.313412	0.753968	0.8866
LOC108696991	1.78657	2.06263	1.98447	1.03938	0.298627	1
LOC108696992	109.562	0.707303	0.242772	2.91345	0.00357464	0.0257157
LOC108696993	1.6304	2.21401	2.4454	0.905376	0.365266	1
LOC108696996	6.6717	-2.92777	1.10586	-2.64751	0.00810875	0.0472474
LOC108697000	81.489	-1.00997	0.348122	-2.9012	0.00371736	0.026476
LOC108697001	1.59803	-1.62858	2.62961	-0.619322	0.535704	1
LOC108697002	1.35025	-0.340062	2.42507	-0.140228	0.88848	1
LOC108697004	1.65221	3.92602	2.64653	1.48346	0.137953	1
LOC108697006	0.971372	2.76335	3.07688	0.898101	0.369132	1
LOC108697008	2.07127	1.68179	2.07453	0.810684	0.417547	1
LOC108697009	104.881	-0.375943	0.273844	-1.37284	0.169803	0.391151
LOC108697013	2.05115	0.803964	2.10143	0.38258	0.702031	1
LOC108697017	1.36845	3.2762	2.69319	1.21647	0.223805	1
LOC108697022	221.533	0.285399	0.311929	0.914947	0.360219	0.610951
LOC108697025	72.9815	1.56975	0.383361	4.0947	4.22709e-05	0.0007401
LOC108697026	1.35595	0.678586	2.87034	0.236413	0.813112	1
LOC108697028	1.48078	0.0818261	1.99526	0.0410103	0.967288	1
LOC108697030	1.3125	-2.28543	2.75278	-0.830227	0.40641	1
LOC108697031	3.54889	1.10277	1.39547	0.790248	0.429383	1
LOC108697040	3.54058	2.34034	1.5972	1.46528	0.142844	1
LOC108697046	7.86471	0.335108	2.95886	0.113256	NA	1
LOC108697047	108.517	0.390548	0.317416	1.2304	0.218548	0.45684
LOC108697051	4.37019	-0.331937	1.16329	-0.285344	0.775381	0.898312
LOC108697053	1.21529	1.25027	3.19213	0.391673	0.6953	1
LOC108697056	5.35504	1.32448	1.12081	1.18172	0.237317	0.480653
LOC108697058	2.13306	0.0369917	1.79235	0.0206386	0.983534	1
LOC108697059	1.38987	2.94201	3.26934	0.89988	0.368184	1
LOC108697060	7.85795	-2.03697	1.00535	-2.02613	0.042751	0.155789
LOC108697068	2.63897	-0.572133	1.83562	-0.311684	0.75528	1
LOC108697069	1.1072	1.47475	2.52997	0.582912	0.559953	1
LOC108697098	1.08279	-2.03803	2.86295	-0.711862	0.47655	1
LOC108697100	8.49267	0.00914677	0.741232	0.01234	0.990154	0.99649
LOC108697106	3.10383	2.18753	2.13424	1.02497	0.305377	1
LOC108697107	2.63274	-1.50131	1.75185	-0.856986	0.391453	1
LOC108697109	24.0444	-0.873735	0.605086	-1.44398	0.148744	0.359943	X
LOC108697112	42.2469	0.433314	0.376577	1.15067	0.24987	0.495263
LOC108697113	1.58995	-0.480015	2.76067	-0.173876	0.861963	1
LOC108697120	1.20422	0	3.55805	0	1	1
LOC108697125	2.10456	2.60265	2.075	1.25429	0.209736	1
LOC108697127	728.767	-0.103868	0.140774	-0.737835	0.460615	0.699435
LOC108697129	14.072	-1.22955	0.645701	-1.90421	0.0568827	0.190219
LOC108697132	397.497	-0.0775288	0.162579	-0.476869	0.633456	0.821213
LOC108697133	60.8011	3.08364	0.47078	6.55006	5.75138e-11	5.23885e-09
LOC108697135	106.55	-0.357223	0.261151	-1.36788	0.17135	0.393373
LOC108697141	9.36943	1.29361	0.978696	1.32177	0.186245	0.413968
LOC108697142	182.989	0.149286	0.217857	0.685247	0.493188	0.725108
LOC108697143	201.471	-0.589315	0.2598	-2.26834	0.0233083	0.102024
LOC108697144	1.07166	-2.77276	2.94726	-0.940792	0.346811	1
LOC108697147	7.83787	0.976538	1.0322	0.946077	0.34411	0.595374
LOC108697152	1.34476	-0.603047	2.63039	-0.229261	0.818666	1
LOC108697154	4.11613	-0.0528215	1.60212	-0.0329698	0.973699	0.991094
LOC108697165	2.34309	2.41926	2.0255	1.1944	0.232321	1
LOC108697172	409.984	-0.00188241	0.14312	-0.0131527	0.989506	0.996185
LOC108697173	20.2888	-0.0307603	0.566955	-0.0542553	0.956732	0.984369
LOC108697174	377.306	0.15326	0.192828	0.794801	0.426729	0.67056
LOC108697177	3.78078	2.52352	1.58917	1.58795	0.112298	0.29908
LOC108697179	44.2193	0.585682	0.463232	1.26434	0.206108	0.440661
LOC108697180	258.987	0.660012	0.200366	3.29404	0.000987598	0.00952968
LOC108697186	349.206	-0.285718	0.205724	-1.38884	0.164881	0.384692
LOC108697189	2.23321	0.900154	1.7444	0.516024	0.605838	1
LOC108697190	4.24115	-1.51244	1.27759	-1.18382	0.236485	0.479635
LOC108697191	8.67473	3.35316	1.42147	2.35893	0.0183276	0.085807
LOC108697195	1.79292	0.201821	2.11499	0.0954241	0.923978	1
LOC108697196	45.5924	-0.205376	0.456769	-0.449628	0.652979	0.832647
LOC108697197	10.4572	0.456507	0.861597	0.529838	0.596224	0.796848
LOC108697204	1.03808	-0.757622	2.82654	-0.268038	0.78867	1
LOC108697205	1.82688	0.693255	2.18906	0.316691	0.751478	1
LOC108697207	6.77869	0.35202	1.12308	0.313443	0.753944	0.8866
LOC108697208	11.3388	-1.06917	0.76588	-1.396	0.162714	0.381645
LOC108697211	469.828	0.580436	0.165296	3.51149	0.000445604	0.00502714
LOC108697212	262.467	0.170863	0.202535	0.843622	0.398881	0.64786	X
LOC108697213	481.368	-0.426396	0.171303	-2.48913	0.0128055	0.065879
LOC108697214	6.13302	0.0943542	1.03947	0.0907717	0.927674	0.971348
LOC108697215	7.81701	0.665478	1.18468	0.561736	0.574296	0.782288
LOC108697216	58.7735	-0.0649504	0.396805	-0.163683	0.86998	0.944044
LOC108697217	493.865	0.365928	0.161368	2.26766	0.0233496	0.102065
LOC108697219	6.70602	0.665901	0.954188	0.697871	0.485258	0.718413
LOC108697220	1.42976	3.7374	2.8565	1.30838	0.190743	1
LOC108697221	1.71345	2.67868	2.11668	1.26551	0.205688	1
LOC108697222	43.0568	0.0299934	0.431469	0.0695146	0.94458	0.978583
LOC108697223	9.85898	0.0303608	0.779468	0.0389507	0.96893	0.989588
LOC108697224	194.989	0.538866	0.267685	2.01306	0.0441081	0.159495
LOC108697226	60.5234	0.309017	0.335248	0.921755	0.356657	0.6076
LOC108697227	49.4085	0.30991	0.360657	0.859293	0.390179	0.639951		X
LOC108697228	5.14446	0.933719	1.42698	0.654334	0.512897	0.737911
LOC108697229	293.469	1.11022	0.171641	6.46825	9.91454e-11	8.64788e-09
LOC108697231	3.31771	0.381749	1.55558	0.245405	0.806143	1
LOC108697233	3.16912	2.9092	2.00316	1.45231	0.146416	1
LOC108697234	1.61354	-1.06789	2.08589	-0.51196	0.608679	1
LOC108697235	2.90913	-0.415749	1.70985	-0.243149	0.80789	1
LOC108697240	6.01917	0.0351305	1.21554	0.0289012	0.976943	0.992004
LOC108697244	418.997	-0.0129868	0.189689	-0.0684637	0.945416	0.979056		X
LOC108697246	3.15592	4.62405	1.91141	2.41918	0.0155557	1
LOC108697247	4.65858	3.36501	1.59751	2.10641	0.0351691	0.136008
LOC108697248	1.60237	4.249	2.39609	1.77331	0.0761773	1
LOC108697250	295.187	0.234911	0.193936	1.21128	0.225788	0.465917
LOC108697253	1.1606	-0.109205	3.45731	-0.0315868	0.974802	1
LOC108697259	523.516	0.0832863	0.183003	0.45511	0.64903	0.830109
LOC108697260	18.9606	-1.19031	0.677966	-1.7557	0.0791391	0.237508
LOC108697261	45.1568	0.194418	0.429388	0.452779	0.650708	0.831136
LOC108697262	6.05241	-0.234328	1.07134	-0.218725	0.826864	0.924039
LOC108697263	526.808	0.0564967	0.247108	0.228632	0.819155	0.920145
LOC108697265	33.5874	-0.320656	0.427125	-0.750732	0.452814	0.693039
LOC108697266	134.223	-0.0864022	0.240782	-0.35884	0.719715	0.868935
LOC108697267	570.599	-0.166868	0.178053	-0.937184	0.348664	0.600059
LOC108697268	5.56483	1.3999	1.36539	1.02528	0.305233	0.555862
LOC108697272	778.448	0.229435	0.418737	0.547922	0.583745	0.788636
LOC108697275	7.23467	1.32089	1.10466	1.19574	0.231798	0.473565
LOC108697277	132.906	0.037986	0.320831	0.118399	0.905752	0.961309
LOC108697281	60.8601	0.127589	0.43943	0.290351	0.771548	0.895831
LOC108697282	10.8066	-0.0761571	0.745516	-0.102154	0.918635	0.967295		X
LOC108697287	337.053	0.0544696	0.194204	0.280476	0.779112	0.90054
LOC108697288	2.6183	-2.59435	1.87022	-1.38719	0.165383	1
LOC108697289	2.65644	-1.58035	1.55053	-1.01923	0.308092	1
LOC108697293	101.358	5.66107	0.685841	8.2542	1.52924e-16	3.54981e-14
LOC108697295	6.2563	2.54386	1.30563	1.94838	0.051369	0.1771
LOC108697297	296.509	-0.334385	0.221262	-1.51126	0.130722	0.330669
LOC108697299	3.83691	0.0730008	1.39667	0.0522678	0.958315	0.985065
LOC108697300	29.8895	-1.12091	0.548517	-2.04353	0.0410003	0.151437
LOC108697302	2.06527	-0.404492	1.92959	-0.209625	0.83396	1
LOC108697305	4.65199	-1.45849	1.30744	-1.11553	0.264622	0.512129
LOC108697306	1478.04	-0.380802	0.322614	-1.18036	0.237856	0.481289
LOC108697307	85.4611	0.748005	0.289871	2.58047	0.00986653	0.0546781
LOC108697308	2.9767	-0.939519	1.51067	-0.62192	0.533994	1
LOC108697309	119.131	-0.717837	0.296805	-2.41855	0.0155825	0.076073
LOC108697311	700.11	0.0415433	0.251969	0.164875	0.869043	0.943731
LOC108697312	242.815	-0.938386	0.261729	-3.58534	0.000336641	0.00401071		X
LOC108697317	128.622	-0.476371	0.282176	-1.68821	0.0913718	0.260311
LOC108697318	32.6247	0.900473	0.586012	1.53661	0.124389	0.319965
LOC108697319	9.28815	2.80207	1.1767	2.3813	0.0172518	0.0820244
LOC108697320	11.0914	2.31762	0.988787	2.3439	0.0190832	0.088467
LOC108697321	24.4005	0.17975	0.558034	0.322113	0.747367	0.883459
LOC108697324	198.105	-0.121258	0.265253	-0.457142	0.647569	0.829386
LOC108697325	40.6665	1.87607	0.57433	3.26653	0.00108873	0.0102745
LOC108697326	145.284	0.382932	0.310791	1.23212	0.217905	0.455959
LOC108697332	94.302	0.188622	0.326256	0.578142	0.563169	0.774557
LOC108697336	308.317	0.592545	0.211541	2.80109	0.00509301	0.0333251
LOC108697341	3.57121	1.48771	1.36759	1.08783	0.276669	1
LOC108697342	1.17154	0.406404	2.22375	0.182756	0.85499	1
LOC108697344	41.5611	0.0672255	0.422455	0.159131	0.873566	0.945901
LOC108697345	2.48416	0.0420829	1.4747	0.0285366	0.977234	1
LOC108697348	1038.78	-0.135474	0.144409	-0.938129	0.348178	0.599686
LOC108697351	1.87788	-0.418043	1.91911	-0.217831	0.827561	1
LOC108697352	3.09947	1.23898	1.90216	0.651353	0.514819	1
LOC108697353	4.92372	1.79966	1.22423	1.47003	0.141553	0.348632
LOC108697358	3.06232	-3.73395	1.9934	-1.87316	0.0610462	1
LOC108697359	36.5914	1.15293	0.4291	2.68686	0.00721271	0.0433606
LOC108697360	3.79285	0.403044	1.24294	0.324267	0.745736	0.882545
LOC108697364	129.62	0.000470504	0.260298	0.00180756	0.998558	0.999623
LOC108697367	41.6082	-0.22422	0.415023	-0.540259	0.589018	0.792192
LOC108697383	0.980534	3.08532	3.49241	0.883436	0.377001	1
LOC108697386	497.133	-1.15356	0.21782	-5.29591	1.18428e-07	4.97639e-06
LOC108697387	134.729	0.210429	0.252117	0.834647	0.403916	0.652615
LOC108697388	138.483	0.175415	0.24473	0.716769	0.473517	0.709179
LOC108697389	5.72072	0.824307	0.997916	0.826028	0.408788	0.656862
LOC108697393	121.052	-0.109224	0.266571	-0.409737	0.681999	0.84863
LOC108697397	68.261	0.474629	0.339181	1.39934	0.161711	0.37982
LOC108697398	1.73687	-0.466709	2.09353	-0.222929	0.823591	1
LOC108697399	721.419	-0.612644	0.168467	-3.63658	0.000276279	0.00338688
LOC108697400	68.4868	-0.249542	0.310928	-0.802574	0.422221	0.667612
LOC108697401	240.629	-0.142091	0.249595	-0.569287	0.569161	0.778241
LOC108697406	157.568	0.488012	0.22896	2.13143	0.0330534	0.130374
LOC108697408	830.977	-0.12502	0.148808	-0.840144	0.400828	0.649672
LOC108697410	603.251	-0.337846	0.163893	-2.06138	0.0392664	0.146918
LOC108697411	3.12584	2.77055	1.76745	1.56754	0.116988	1
LOC108697415	2.53421	1.91192	1.8016	1.06123	0.288585	1
LOC108697416	226.03	-0.181017	0.17653	-1.02542	0.305164	0.555858
LOC108697417	111.789	0.0162978	0.290335	0.0561343	0.955235	0.983691
LOC108697420	663.528	-0.371331	0.228499	-1.62509	0.104143	0.283869
LOC108697421	6.09359	5.14106	1.53198	3.35581	0.000791317	0.00799483
LOC108697426	16.788	0.902984	0.636432	1.41882	0.155951	0.371105
LOC108697429	2.71743	0.193788	1.45731	0.132976	0.894212	1
LOC108697430	88.2163	0.298748	0.287895	1.0377	0.29941	0.550403
LOC108697431	31.2612	-0.525452	0.601871	-0.873031	0.382646	0.632173
LOC108697433	13.4341	-0.0366601	1.01774	-0.036021	0.971266	0.990256
LOC108697434	130.981	-0.39998	0.268304	-1.49077	0.136022	0.339577
LOC108697436	21.2223	1.39987	0.537154	2.60608	0.00915839	0.0517603
LOC108697440	2.9441	1.2717	1.49491	0.850687	0.394943	1
LOC108697441	20.8073	2.47962	0.583455	4.24989	2.13874e-05	0.000416238
LOC108697442	1.70864	1.658	2.51254	0.659891	0.509324	1
LOC108697444	1680.36	-0.674293	0.142134	-4.74407	2.09471e-06	5.9228e-05
LOC108697447	155.875	-0.272632	0.2257	-1.20794	0.227071	0.467325
LOC108697450	2.34464	4.70251	2.25154	2.08858	0.0367455	1
LOC108697453	66.1528	-0.27131	0.308453	-0.879581	0.379086	0.62869
LOC108697458	0.994961	-0.964356	3.19412	-0.301916	0.762716	1
LOC108697459	2.09464	5.57259	2.48134	2.2458	0.024717	1
LOC108697460	18.0708	0.795922	0.952621	0.835508	0.403432	0.652104
LOC108697462	60.3456	-0.31257	0.373201	-0.837538	0.40229	0.651084
LOC108697463	180.06	-0.59711	0.291953	-2.04523	0.0408326	0.150954
LOC108697464	0.987664	-0.878063	2.6431	-0.33221	0.739731	1
LOC108697466	315.026	0.456737	0.20515	2.22635	0.0259906	0.110423
LOC108697467	118.753	0.192718	0.287988	0.669186	0.503377	0.731475
LOC108697468	1.70737	-1.65694	2.41264	-0.686772	0.492226	1
LOC108697469	222.678	0.00664414	0.232078	0.0286289	0.977161	0.992015		X
LOC108697471	266.895	-0.698377	0.289473	-2.41258	0.0158402	0.0769525
LOC108697472	284.55	0.272608	0.165317	1.649	0.0991477	0.275108
LOC108697475	79.5321	-0.076443	0.294475	-0.259591	0.795179	0.908271
LOC108697476	126.016	0.601063	0.319036	1.884	0.0595656	0.196025
LOC108697479	4.43654	2.3506	1.47312	1.59566	0.110566	0.29595
LOC108697481	1.16074	3.20501	3.03015	1.05771	0.290189	1
LOC108697488	7.53948	-1.0711	0.931878	-1.1494	0.250391	0.495924
LOC108697489	1.21863	-2.46081	3.08448	-0.797804	0.424984	1
LOC108697491	30.711	2.00958	0.690089	2.91207	0.00359047	0.0258048
LOC108697493	52.1275	0.00548081	0.438416	0.0125014	0.990026	0.99649
LOC108697494	19.6422	1.66928	0.735645	2.26914	0.0232599	0.101936
LOC108697495	1.10225	2.62041	3.55372	0.737371	0.460896	1
LOC108697500	2.09012	3.86733	2.01213	1.92201	0.0546046	1
LOC108697502	4.79803	-0.497727	1.06908	-0.465568	0.641525	0.825686
LOC108697503	1.78235	0.858445	1.89587	0.452798	0.650694	1
LOC108697504	261.083	0.147848	0.231719	0.638048	0.523443	0.745474
LOC108697505	30.504	0.128367	0.523364	0.245272	0.806246	0.913531
LOC108697507	6.05291	0.973019	1.04655	0.929742	0.352505	0.603742
LOC108697508	20.7787	0.269037	0.523127	0.514285	0.607052	0.804558
LOC108697509	11.9431	-0.138369	0.895965	-0.154435	0.877267	0.947798
LOC108697512	25.7125	-1.51746	0.509394	-2.97896	0.0028923	0.0220464
LOC108697521	49.4603	2.46341	0.509057	4.83915	1.30393e-06	3.93833e-05
LOC108697523	2.06229	0.415318	1.95776	0.21214	0.831998	1
LOC108697525	41.3963	0.0831217	0.477274	0.174159	0.86174	0.939978
LOC108697528	4.32813	0.00281665	1.12299	0.00250817	0.997999	0.999422
LOC108697529	7.83545	-0.0207722	1.03773	-0.020017	0.98403	0.994429
LOC108697530	5.53745	3.26122	1.69958	1.91884	0.0550051	0.185677
LOC108697531	1.97982	2.85189	2.22193	1.28352	0.19931	1
LOC108697535	32.1392	0.66523	0.588502	1.13038	0.258317	0.504891
LOC108697536	748.686	-0.12219	0.154064	-0.793114	0.427711	0.67136
LOC108697537	19.2845	-1.33253	0.664165	-2.00633	0.0448213	0.161206
LOC108697538	173.984	0.777533	0.233429	3.33092	0.000865584	0.0085884
LOC108697539	293.471	0.19581	0.205639	0.952201	0.340995	0.592312
LOC108697541	0.948322	-0.135399	2.84237	-0.0476362	0.962006	1
LOC108697542	3894.12	0.537832	0.116689	4.60911	4.0439e-06	0.000102917
LOC108697544	1024.23	0.0800268	0.191579	0.417722	0.67615	0.845775
LOC108697547	498.493	-0.0947707	0.13684	-0.692564	0.488583	0.721199
LOC108697548	14.0588	0.917635	0.78944	1.16239	0.245078	0.489799
LOC108697549	12.4432	2.57958	0.987333	2.61267	0.00898372	0.0510235
LOC108697552	7.7514	1.8051	1.26664	1.42511	0.154125	0.368528
LOC108697553	5.06673	0.152245	1.21749	0.125049	0.900485	0.95906
LOC108697557	454.101	-1.62443	0.173887	-9.34186	9.46586e-21	4.00684e-18
LOC108697558	4.0491	0.19135	1.16359	0.164447	0.869379	0.943882
LOC108697559	34.4318	2.28755	0.544009	4.20498	2.61109e-05	0.000492836
LOC108697560	149.676	1.58993	0.274661	5.7887	7.09319e-09	4.12845e-07
LOC108697562	9.57095	0.194616	0.790359	0.246237	0.805498	0.913228
LOC108697563	31.6272	0.859212	0.472053	1.82016	0.0687349	0.215626
LOC108697564	45.1966	-0.782785	0.419229	-1.8672	0.0618736	0.201239
LOC108697565	6.35509	-0.129741	0.969618	-0.133807	0.893555	0.955853
LOC108697566	2.96579	4.35302	4.07521	1.06817	0.285444	1
LOC108697567	5.05821	0.54607	1.20337	0.453784	0.649984	0.830713
LOC108697571	1015.14	0.0288535	0.147057	0.196207	0.844448	0.931714
LOC108697577	1.45184	-2.45836	3.23608	-0.759672	0.447451	1
LOC108697579	204.161	-0.17739	0.224899	-0.788755	0.430255	0.673609
LOC108697580	2.37748	-1.18858	1.98335	-0.599281	0.548985	1
LOC108697581	3.24708	4.37817	1.97347	2.21852	0.0265194	1
LOC108697585	42.0305	0.834461	0.446353	1.86951	0.0615521	0.200602
LOC108697589	12.8702	-0.432435	0.871286	-0.496318	0.61967	0.812625
LOC108697591	69.5783	0.0297911	0.342191	0.0870597	0.930624	0.972449
LOC108697597	26.2256	1.54084	0.596155	2.58463	0.00974842	0.0541905
LOC108697599	91.7158	-0.903215	1.04941	-0.860686	0.389411	0.63897
LOC108697600	19.957	-0.0646202	0.566052	-0.114159	0.909111	0.962759
LOC108697603	313.657	-0.220162	0.205988	-1.06881	0.285156	0.5348
LOC108697606	3.65632	1.5623	1.55705	1.00337	0.315681	1
LOC108697608	37.907	0.348344	0.555642	0.626921	0.530711	0.750589
LOC108697610	105.39	-0.48621	0.31023	-1.56726	0.117054	0.307193
LOC108697611	2.61065	0.0596159	1.71554	0.0347505	0.972279	1
LOC108697612	1.01651	-1.87106	3.0345	-0.616598	0.5375	1
LOC108697613	1.78778	2.29101	2.16004	1.06063	0.288857	1
LOC108697619	749.455	0.463234	0.189163	2.44887	0.0143306	0.0715761
LOC108697620	5.37383	2.50086	1.25061	1.99971	0.0455311	0.163046
LOC108697621	342.102	-0.140279	0.190994	-0.734466	0.462665	0.700983
LOC108697627	5.2053	2.1326	1.25784	1.69545	0.0899905	0.258042
LOC108697630	440.7	-0.0574102	0.189572	-0.302841	0.762011	0.89115
LOC108697634	48.1855	0.0080442	0.434859	0.0184984	0.985241	0.994718
LOC108697635	2.05735	0.0765212	1.4799	0.051707	0.958762	1
LOC108697640	448.1	0.0658275	0.160686	0.409666	0.682051	0.84863
LOC108697641	361.305	0.33523	0.19597	1.71061	0.0871523	0.252942
LOC108697646	45.1826	0.219995	0.522134	0.421339	0.673508	0.844185
LOC108697648	77.4433	-0.0697007	0.341195	-0.204284	0.838132	0.929198
LOC108697649	93.081	0.465821	0.340577	1.36774	0.171394	0.393381
LOC108697652	1.65051	2.71186	2.50126	1.0842	0.278277	1
LOC108697654	47.2942	0.30521	0.376054	0.811612	0.417014	0.663679
LOC108697655	151.573	0.0188806	0.248378	0.0760156	0.939407	0.975887
LOC108697657	20.7677	1.71938	0.865289	1.98705	0.0469163	0.166392
LOC108697658	3.72454	-0.387792	1.39581	-0.277827	0.781145	0.901119
LOC108697659	17.3076	-0.150226	0.734647	-0.204487	0.837973	0.929193
LOC108697661	182.95	0.0727512	0.224877	0.323515	0.746305	0.88295
LOC108697662	2.19645	0.669763	2.05944	0.325217	0.745017	1
LOC108697665	11.9017	-2.5696	0.964951	-2.66293	0.0077463	0.0457937
LOC108697666	14.4049	0.0514245	0.71327	0.0720967	0.942525	0.977468
LOC108697669	37.4094	0.120991	0.577804	0.209397	0.834138	0.927469
LOC108697670	923.455	-0.850052	0.165055	-5.15012	2.60325e-07	9.88549e-06
LOC108697678	110.213	0.347821	0.309839	1.12259	0.261613	0.508635
LOC108697679	2.66635	0.213469	1.66992	0.127832	0.898282	1
LOC108697683	160.095	0.0383816	0.235077	0.163273	0.870304	0.944245	X
LOC108697686	4.74644	-0.8609	1.07139	-0.803533	0.421667	0.667314
LOC108697687	243.534	-0.546462	0.228678	-2.38965	0.0168643	0.0805702
LOC108697692	102.242	0.120434	0.36445	0.330453	0.741058	0.880375		X
LOC108697695	46.5527	0.60479	0.397968	1.5197	0.128587	0.326929
LOC108697697	1.42279	-1.61174	2.01865	-0.798421	0.424626	1
LOC108697699	48.4693	1.1676	0.521517	2.23885	0.0251659	0.107936
LOC108697700	26.0205	1.2481	0.554793	2.24966	0.0244704	0.105759
LOC108697701	3.5925	1.16275	1.25522	0.926333	0.354273	1
LOC108697702	217.025	-0.0157064	0.201369	-0.0779983	0.937829	0.975305
LOC108697703	31.8285	0.945203	0.529204	1.78608	0.0740856	0.227635
LOC108697705	17.6351	-0.819562	0.645105	-1.27043	0.203931	0.438023
LOC108697709	3.10498	0.177331	1.4485	0.122424	0.902563	1
LOC108697710	57.6217	-0.138855	0.375516	-0.369771	0.711553	0.863973
LOC108697712	38.1416	-0.00541764	0.401387	-0.0134973	0.989231	0.996062
LOC108697713	156.902	-0.384836	0.208984	-1.84146	0.0655538	0.20889
LOC108697714	1023.88	-0.318281	0.174932	-1.81945	0.0688421	0.215899
LOC108697715	11.4323	1.65747	0.90595	1.82954	0.0673187	0.212607
LOC108697718	1.46233	-2.28845	2.29076	-0.998993	0.317798	1
LOC108697719	2.25842	0.855937	4.46237	0.191812	0.847889	1
LOC108697722	246.744	-0.258704	0.217575	-1.18903	0.234427	0.477142
LOC108697723	74.9555	0.802891	0.328006	2.4478	0.0143733	0.0717643
LOC108697724	209.252	-0.197451	0.218188	-0.904958	0.365488	0.615612
LOC108697726	38.4856	-0.160622	0.38948	-0.412402	0.680045	0.847671
LOC108697729	402.052	0.346572	0.198113	1.74936	0.0802281	0.239652	X
LOC108697731	6.09125	2.6605	1.31322	2.02594	0.0427709	0.155818
LOC108697732	61.1522	0.43457	0.394134	1.10259	0.270204	0.518315
LOC108697733	193.121	-0.279205	0.208203	-1.34102	0.179913	0.405498
LOC108697734	48.3976	0.190601	0.423058	0.450533	0.652326	0.832294
LOC108697737	63.808	1.66442	0.3753	4.43489	9.212e-06	0.000206028
LOC108697738	23.6138	-0.6415	0.513905	-1.24828	0.211927	0.447866
LOC108697739	21.4154	0.331736	0.675097	0.491391	0.62315	0.814543
LOC108697749	41.7617	0.0409617	0.503726	0.0813175	0.935189	0.97432
LOC108697754	3.7507	-0.255904	1.33015	-0.192386	0.847439	0.933013
LOC108697757	56.6335	-0.559732	0.368232	-1.52005	0.128498	0.326839	X
LOC108697759	43.5361	-0.156077	0.391197	-0.398973	0.689913	0.852198
LOC108697760	9589.18	-0.325468	0.0988698	-3.29189	0.000995178	0.00958402
LOC108697765	430.487	0.114156	0.200055	0.570623	0.568255	0.777563
LOC108697770	247.969	0.617968	0.186642	3.31099	0.000929675	0.00910196
LOC108697771	64.1953	0.958633	0.339578	2.82302	0.00475741	0.0316838
LOC108697772	1.34082	2.82036	2.34471	1.20286	0.229031	1
LOC108697773	802.548	0.00901595	0.162207	0.0555831	0.955674	0.983838
LOC108697778	82.3791	-0.244173	0.282214	-0.865206	0.386926	0.636416
LOC108697779	108.077	-0.086766	0.364622	-0.237961	0.811911	0.916149		X
LOC108697781	20.9693	4.10615	0.933825	4.39713	1.09692e-05	0.00023633
LOC108697783	20.5881	-0.136169	0.635836	-0.214158	0.830424	0.925737
LOC108697787	0.968321	2.72504	3.59396	0.758228	0.448315	1
LOC108697789	67.6384	0.986963	0.366352	2.69403	0.00705938	0.0426885
LOC108697790	1.43632	-0.922041	2.20795	-0.4176	0.67624	1
LOC108697791	3.97524	0.78468	1.14237	0.686888	0.492154	0.724204
LOC108697792	572.914	-0.0755742	0.155787	-0.485113	0.627596	0.817618
LOC108697796	13.7585	-1.36057	0.931615	-1.46045	0.144167	0.352716
LOC108697797	12.2349	-2.32385	0.900709	-2.58002	0.00987943	0.0547285
LOC108697800	2.88125	1.55192	1.62029	0.957801	0.338163	1
LOC108697803	22.7082	0.0414487	0.648549	0.0639099	0.949042	0.980835
LOC108697807	2.29508	-0.0190834	2.00548	-0.00951563	0.992408	1
LOC108697808	431.506	-0.127914	0.162958	-0.784948	0.432484	0.675222
LOC108697814	119.628	0.631424	0.327395	1.92863	0.0537765	0.182708
LOC108697815	818.161	-0.446216	0.137184	-3.25268	0.00114323	0.0106451
LOC108697819	1.62714	1.72581	2.37837	0.725626	0.468068	1
LOC108697823	21.0698	0.541728	0.581105	0.932237	0.351214	0.602392
LOC108697824	68.7624	-0.333051	0.329044	-1.01218	0.311453	0.56256
LOC108697825	93.8626	0.660647	0.313165	2.10958	0.0348942	0.135272	X
LOC108697826	3.19522	0.283656	1.80849	0.156847	0.875365	1
LOC108697827	37.3142	1.09564	0.493552	2.21991	0.0264249	0.111707
LOC108697828	1.3783	2.27964	2.74928	0.829177	0.407004	1
LOC108697830	4.60961	0.0376159	1.25068	0.0300763	0.976006	0.991603
LOC108697833	44.5498	0.546023	0.500179	1.09166	0.274985	0.524014
LOC108697837	7.81574	-0.446553	0.936047	-0.477063	0.633317	0.821145
LOC108697839	268.864	0.158283	0.216912	0.72971	0.465568	0.703459
LOC108697840	183.312	0.984295	0.307731	3.19856	0.00138115	0.0123157
LOC108697842	2.91412	-0.202956	1.67507	-0.121163	0.903562	1
LOC108697848	19.1382	1.12793	0.569697	1.97987	0.0477182	0.168138
LOC108697853	190.873	0.175489	0.213045	0.823718	0.4101	0.657732
LOC108697854	63.0503	0.888814	0.323939	2.74377	0.00607376	0.0381719
LOC108697855	160.895	-0.651499	0.328043	-1.98602	0.0470316	0.166609
LOC108697856	917.183	0.496472	0.182229	2.72443	0.00644118	0.0397455
LOC108697859	19.2391	-0.841786	0.652614	-1.28987	0.197097	0.429108
LOC108697860	317.723	0.00454293	0.220158	0.0206349	0.983537	0.994208
LOC108697862	21.5948	-0.035195	0.649474	-0.05419	0.956784	0.984369
LOC108697863	61.4979	0.229297	0.358915	0.638862	0.522913	0.745076	X
LOC108697865	100.489	0.904561	0.323755	2.79397	0.00520654	0.0339215
LOC108697866	2.12574	-0.444904	2.18632	-0.203494	0.838749	1
LOC108697867	3.35431	-0.15328	1.4827	-0.103379	0.917662	1
LOC108697869	24.7279	0.449468	0.691553	0.649941	0.515731	0.739651
LOC108697870	1518.42	0.276657	0.202219	1.3681	0.17128	0.393339
LOC108697873	11.8471	0.126547	0.717954	0.17626	0.86009	0.939034
LOC108697874	20.3104	1.61922	0.577763	2.80257	0.00506979	0.0332034
LOC108697876	817.291	0.890624	0.155069	5.74342	9.27824e-09	5.21611e-07
LOC108697877	4.44264	1.62339	1.36512	1.18919	0.234364	0.477049
LOC108697881	1.30884	-1.4827	2.74969	-0.539225	0.589732	1
LOC108697882	1.4946	0.329925	2.54048	0.129867	0.896672	1
LOC108697883	16.5045	0.122716	0.705203	0.174015	0.861854	0.939978
LOC108697885	10.3263	-0.125673	0.850903	-0.147694	0.882585	0.950721
LOC108697886	608.888	-0.0149172	0.176784	-0.0843809	0.932754	0.973791
LOC108697887	2685.17	0.723517	0.150017	4.82292	1.41473e-06	4.22515e-05
LOC108697888	244.007	-0.656172	0.186687	-3.51483	0.000440031	0.00497481
LOC108697889	4.87847	2.74689	1.5	1.83126	0.0670611	0.21205
LOC108697890	8.52766	-0.678345	0.998874	-0.679109	0.497069	0.727716
LOC108697891	2.55903	-0.0219837	1.63269	-0.0134647	0.989257	1
LOC108697894	40.1018	4.76806	0.637951	7.47402	7.77821e-14	1.19726e-11
LOC108697895	2.23262	1.27556	1.81321	0.703478	0.481758	1
LOC108697897	54.269	0.339309	0.397676	0.85323	0.393532	0.643347
LOC108697900	4.75325	0.349776	1.37336	0.254686	0.798966	0.910115
LOC108697901	178.799	0.648167	0.240545	2.69457	0.00704791	0.042637
LOC108697903	196.177	1.98605	0.312248	6.36049	2.01111e-10	1.63064e-08
LOC108697904	429.217	0.0715004	0.160008	0.446857	0.654979	0.833766		X
LOC108697905	206.051	-0.465904	0.197245	-2.36205	0.018174	0.0852819
LOC108697912	3.55142	-1.39991	1.89888	-0.73723	0.460982	1
LOC108697919	52.7597	-0.0283583	0.390529	-0.0726152	0.942112	0.977181
LOC108697920	5.91028	-1.19105	1.13048	-1.05358	0.292074	0.542714
LOC108697921	4.06029	1.57786	1.28613	1.22684	0.219885	0.458635
LOC108697922	2.12254	2.06999	2.11687	0.977853	0.328147	1
LOC108697923	7.63976	-1.97412	1.01058	-1.95346	0.0507656	0.17569
LOC108697924	1.09032	1.72192	3.11871	0.552126	0.580862	1
LOC108697926	17.4774	1.42851	0.767541	1.86115	0.0627236	0.202995
LOC108697928	13.9233	0.923015	0.781306	1.18138	0.237454	0.480787
LOC108697932	18.8295	1.38537	0.639866	2.16509	0.0303808	0.122944
LOC108697934	3.90856	-2.02517	1.35576	-1.49376	0.135239	0.338293
LOC108697935	3.05592	0.422309	1.26149	0.33477	0.737799	1
LOC108697936	5.6971	-0.556147	1.03348	-0.538132	0.590486	0.793304
LOC108697943	1.8403	0.844742	1.82525	0.462808	0.643502	1
LOC108697946	7.30603	0.514021	1.00534	0.511291	0.609147	0.806073
LOC108697947	22.9748	0.167437	0.501293	0.33401	0.738372	0.879076
LOC108697950	1.00467	3.7375	2.98029	1.25407	0.209815	1
LOC108697951	4.68644	-0.235036	1.21429	-0.193558	0.846522	0.932485
LOC108697952	1.1478	1.63538	3.13635	0.521427	0.602069	1
LOC108697953	6.72002	-1.06789	1.15979	-0.920763	0.357174	0.608
LOC108697954	42.1093	0.879339	0.377881	2.32702	0.019964	0.0911989
LOC108697955	60.6913	0.97559	0.378319	2.57875	0.0099159	0.0548499
LOC108697962	5.39768	2.11794	1.32583	1.59744	0.110167	0.295172
LOC108697964	56.3322	-1.10455	0.395989	-2.78934	0.00528153	0.0342894
LOC108697966	1.56617	1.17123	1.85264	0.632198	0.527257	1
LOC108697968	0.952349	1.64229	3.37025	0.48729	0.626053	1
LOC108697982	3.33429	2.70773	1.60002	1.69231	0.0905875	1
LOC108697988	87.9824	-0.415571	0.305176	-1.36174	0.17328	0.396124	X
LOC108697991	16.0603	-0.000991218	0.6415	-0.00154516	0.998767	0.999627
LOC108697992	3.51707	4.74664	1.8129	2.61826	0.00883802	1
LOC108697994	1.29208	0.0505261	2.38145	0.0212166	0.983073	1
LOC108698000	1.75993	-1.09817	2.78251	-0.39467	0.693086	1
LOC108698019	361.992	0.121317	0.177751	0.682507	0.494918	0.726193
LOC108698020	2.0072	-4.10141	2.07797	-1.97376	0.0484089	1
LOC108698025	83.1387	-0.569761	0.38585	-1.47664	0.139772	0.345815
LOC108698033	55.678	-0.187613	0.508577	-0.368898	0.712203	0.864331
LOC108698034	1.76881	-0.92355	2.51046	-0.36788	0.712963	1
LOC108698037	164.122	-0.621291	0.239486	-2.59427	0.00947913	0.0530728
LOC108698038	2.74543	1.95993	1.96531	0.997259	0.318639	1
LOC108698040	65.2015	0.845784	0.428683	1.97298	0.0484978	0.170177
LOC108698044	2.38919	2.94939	2.5564	1.15373	0.248612	1
LOC108698045	9.69859	1.76464	0.868564	2.03168	0.0421865	0.154451
LOC108698046	1.2387	1.56532	2.54671	0.614646	0.538789	1
LOC108698048	466.557	0.473705	0.171981	2.7544	0.00588001	0.0372716
LOC108698051	760.713	-0.552715	0.167684	-3.29617	0.000980142	0.00946725
LOC108698053	166.564	-0.528222	0.279958	-1.88679	0.0591884	0.19514
LOC108698062	255.791	-1.07647	0.220817	-4.87495	1.08835e-06	3.36489e-05
LOC108698063	6.14497	-0.627577	1.03938	-0.6038	0.545977	0.762809
LOC108698064	72.7787	-0.200022	0.3145	-0.636	0.524777	0.74634
LOC108698068	94.4932	0.826047	0.314245	2.62868	0.0085718	0.0493264
LOC108698070	5.46335	-0.323143	1.16956	-0.276294	0.782322	0.901564
LOC108698071	1.28004	-0.0982794	2.65344	-0.0370385	0.970454	1
LOC108698072	366.96	-0.251841	0.184991	-1.36137	0.173396	0.396234
LOC108698074	495.897	-0.515171	0.143763	-3.58347	0.000339061	0.00402787
LOC108698076	1280.71	0.205204	0.179072	1.14593	0.251825	0.49736
LOC108698077	2.70608	0.8123	1.68908	0.480913	0.630579	1
LOC108698078	1.11249	-0.212954	2.49534	-0.0853406	0.931991	1
LOC108698083	2.17169	1.43225	2.084	0.687261	0.491918	1
LOC108698084	210.151	0.0263337	0.251847	0.104562	0.916723	0.966382
LOC108698085	438.369	-0.187525	0.186196	-1.00714	0.313867	0.564929
LOC108698086	458.177	0.194829	0.181383	1.07413	0.282764	0.532036
LOC108698087	66.8183	3.20886	0.554	5.79217	6.94826e-09	4.07329e-07
LOC108698088	4.05967	1.86585	1.59439	1.17026	0.241895	0.486155
LOC108698089	101.308	0.626754	0.314914	1.99024	0.0465647	0.16542
LOC108698090	21.1551	0.0902098	0.777454	0.116032	0.907627	0.962216
LOC108698091	300.32	-0.483737	0.191095	-2.53139	0.0113611	0.0605366
LOC108698093	115.128	-0.598487	0.266426	-2.24635	0.0246816	0.106432
LOC108698095	2.48275	4.24054	2.22014	1.91004	0.0561286	1
LOC108698096	50.4027	1.12949	0.432667	2.61053	0.00904033	0.0512541
LOC108698097	29.5175	0.796408	0.573343	1.38906	0.164814	0.384629	X
LOC108698099	1051.28	-0.318159	0.240306	-1.32398	0.185511	0.412909
LOC108698100	26.7629	-0.404396	0.563641	-0.717471	0.473084	0.70882
LOC108698101	2.72578	0.96911	1.85411	0.522682	0.601196	1
LOC108698102	3.33292	0.00641652	1.66577	0.00385198	0.996927	1
LOC108698103	53.5609	-0.0923088	0.356756	-0.258745	0.795832	0.908476
LOC108698104	391.694	-0.2693	0.161562	-1.66685	0.0955443	0.268019
LOC108698105	13.0555	-0.349486	0.693185	-0.504174	0.614139	0.809293
LOC108698106	0.875777	-1.00797	2.56735	-0.39261	0.694608	1
LOC108698107	8.40758	0.959619	0.906831	1.05821	0.289959	0.539998
LOC108698109	190.129	0.725152	0.229191	3.16396	0.00155638	0.0135679
LOC108698110	1.71767	-4.6213	2.37763	-1.94366	0.0519365	1
LOC108698113	4.30628	4.10474	1.96757	2.0862	0.0369607	0.140981
LOC108698116	2.15666	3.12525	2.09703	1.49032	0.136139	1
LOC108698118	4.93204	-2.34868	1.58984	-1.4773	0.139594	0.345493
LOC108698119	1.97172	1.4307	1.86448	0.767347	0.442875	1
LOC108698121	2.76954	4.92636	1.967	2.5045	0.0122624	1
LOC108698122	4.06035	1.10614	1.46847	0.753259	0.451294	0.692152
LOC108698123	9.42489	-0.646178	0.835112	-0.773763	0.439071	0.680647
LOC108698132	708.66	-0.171668	0.161568	-1.06251	0.288002	0.538009
LOC108698133	107.726	-0.132605	0.287749	-0.460835	0.644917	0.827683
LOC108698134	14.0479	0.844161	0.645941	1.30687	0.191257	0.421365
LOC108698136	218.567	2.05987	0.2747	7.49861	6.44968e-14	9.98105e-12
LOC108698137	44.0355	-0.100132	0.359547	-0.278494	0.780633	0.900916
LOC108698138	3.0853	-0.716878	1.335	-0.536989	0.591275	1
LOC108698139	54.9832	2.84266	0.528237	5.3814	7.39088e-08	3.26788e-06
LOC108698140	1.1448	1.7399	2.25456	0.771724	0.440278	1
LOC108698141	426.635	-0.53628	0.170893	-3.13811	0.00170043	0.0146013
LOC108698145	2.99019	-1.18139	1.7682	-0.668134	0.504048	1
LOC108698149	1189.4	0.406702	0.220657	1.84314	0.0653079	0.208222
LOC108698152	31.5355	-1.30822	0.614755	-2.12804	0.0333337	0.131219
LOC108698153	44.3389	-2.91085	0.431208	-6.75045	1.47383e-11	1.47814e-09
LOC108698154	19.9165	-2.7306	0.690896	-3.95225	7.74193e-05	0.00120979
LOC108698157	2.2674	-4.81671	2.09793	-2.29593	0.0216796	1
LOC108698158	3.3195	-1.27868	1.59656	-0.800898	0.423191	1
LOC108698160	4.37484	1.23728	1.38647	0.892399	0.372179	0.622185
LOC108698162	10.8117	-0.339142	0.845223	-0.401245	0.68824	0.851404
LOC108698163	1141.55	-0.0306487	0.125045	-0.245102	0.806378	0.913558
LOC108698165	61.3435	1.33117	0.404924	3.28745	0.00101098	0.00971621
LOC108698169	7.58578	1.05979	1.19841	0.884334	0.376516	0.626598
LOC108698170	1.67506	-1.85573	2.61406	-0.709903	0.477764	1
LOC108698172	85.4804	-0.0363306	0.307262	-0.11824	0.905878	0.961309
LOC108698178	6.02527	3.5292	1.48229	2.38092	0.0172696	0.0820862
LOC108698179	537.817	-0.184654	0.164787	-1.12056	0.262474	0.509582
LOC108698182	6.40761	0.579596	1.40645	0.412098	0.680268	0.847726
LOC108698183	6.09352	0.175382	0.902318	0.194368	0.845888	0.932299
LOC108698184	11.765	1.81652	0.752331	2.41453	0.0157557	0.0766456
LOC108698186	8.64174	-1.62035	0.918362	-1.76439	0.0776665	0.234778
LOC108698187	194.108	0.446397	0.239182	1.86635	0.0619924	0.201363
LOC108698189	69.6392	0.592421	0.312099	1.89818	0.0576723	0.191735		X
LOC108698191	781.562	-0.0666158	0.21357	-0.311915	0.755105	0.887386
LOC108698194	185.896	0.966962	0.315594	3.06395	0.00218437	0.0178455
LOC108698195	1.06857	2.06327	2.95205	0.698926	0.484598	1
LOC108698196	117.871	0.428309	0.336348	1.27341	0.202873	0.436631
LOC108698198	2.59451	2.10288	1.76908	1.18869	0.234562	1
LOC108698199	17.7512	0.635505	0.648068	0.980615	0.326783	0.578197
LOC108698200	13.9728	0.481725	0.627424	0.767783	0.442616	0.684078
LOC108698202	33.5948	-0.560739	0.394768	-1.42043	0.155484	0.370453
LOC108698211	26.8374	-1.68101	0.541791	-3.10269	0.00191768	0.0160928
LOC108698213	5.35293	1.74457	1.2911	1.35123	0.176621	0.400908
LOC108698214	61.1411	0.192093	0.387454	0.495781	0.620049	0.812859
LOC108698216	9.30677	-1.30765	0.945208	-1.38345	0.166528	0.386929
LOC108698217	4.82819	-1.3083	1.28014	-1.022	0.306781	0.557396		X
LOC108698218	1.28838	1.77866	2.20278	0.807462	0.419401	1
LOC108698220	181.064	-0.396322	0.235118	-1.68563	0.0918668	0.261088
LOC108698222	2.25129	-0.442167	1.66329	-0.265839	0.790363	1
LOC108698223	1.15336	0.825376	2.99789	0.275319	0.783071	1
LOC108698226	18.5693	-0.0794768	0.596769	-0.133179	0.894052	0.956065
LOC108698227	71.9056	1.35371	0.357295	3.78879	0.000151386	0.00209595
LOC108698228	137.906	0.205008	0.249518	0.821614	0.411297	0.658844
LOC108698229	204.119	0.652307	0.20489	3.1837	0.00145405	0.0128227
LOC108698230	658.668	-0.792853	0.156108	-5.07886	3.79713e-07	1.34768e-05
LOC108698231	1.59529	0.700442	2.18525	0.320532	0.748565	1
LOC108698232	113.683	-0.160118	0.251136	-0.637573	0.523752	0.745656		X
LOC108698234	1.35516	-0.271548	2.53814	-0.106987	0.914799	1
LOC108698236	4.88184	2.17917	1.22355	1.78102	0.0749096	0.229212
LOC108698238	288.238	-0.343132	0.22741	-1.50887	0.131332	0.331589
LOC108698239	799.497	-0.375693	0.182348	-2.06031	0.0393691	0.147188
LOC108698242	692.395	-0.157738	0.151968	-1.03797	0.299286	0.550316
LOC108698243	108.099	-0.728943	0.271541	-2.68447	0.00726444	0.0436443
LOC108698244	12.5702	0.733621	0.900498	0.814684	0.415253	0.662123
LOC108698250	7.2781	0.606399	1.14176	0.531107	0.595345	0.796375
LOC108698252	18.8984	-0.939994	1.39746	-0.672644	0.501174	0.729888
LOC108698253	115.641	0.780292	0.293991	2.65413	0.00795126	0.0466319
LOC108698254	243.288	0.639638	0.245099	2.60971	0.00906187	0.0513357
LOC108698255	118.096	0.267114	0.261851	1.0201	0.307682	0.558555
LOC108698259	0.962054	1.26255	3.02722	0.417065	0.676631	1
LOC108698260	23.6757	-0.36268	0.598327	-0.606157	0.54441	0.761475
LOC108698261	2.89198	-1.2609	1.59491	-0.790577	0.429191	1
LOC108698262	2456.46	-0.211703	0.125219	-1.69066	0.090902	0.259653
LOC108698263	179.241	0.419911	0.232553	1.80566	0.070972	0.220754	X
LOC108698265	31.6721	0.386283	0.521351	0.740926	0.458738	0.698272
LOC108698269	215.867	0.113084	0.21348	0.529716	0.596309	0.796868
LOC108698272	25.2413	0.390274	0.465837	0.837791	0.402148	0.65101
LOC108698278	74.8671	0.303954	0.4326	0.702621	0.482292	0.716136
LOC108698280	346.22	0.744824	0.220312	3.38077	0.000722824	0.00741475
LOC108698283	627.922	-0.39103	0.173189	-2.25783	0.0239564	0.104038
LOC108698286	22.3118	0.405391	0.609672	0.664933	0.506093	0.732796
LOC108698287	101.255	-0.212131	0.260637	-0.813893	0.415706	0.662391
LOC108698288	624.257	-0.0854705	0.149168	-0.57298	0.566658	0.776699
LOC108698289	653.029	-0.474704	0.139402	-3.40528	0.000660969	0.00690575
LOC108698291	885.308	0.535629	0.121065	4.42432	9.67455e-06	0.00021396
LOC108698293	5.55945	3.00011	1.21028	2.47884	0.0131809	0.0673172
LOC108698296	35.0796	1.7267	0.479083	3.60418	0.000313144	0.00376505
LOC108698297	3.47619	-0.87919	1.26825	-0.69323	0.488165	1
LOC108698299	1.59926	2.17791	2.00945	1.08383	0.278439	1
LOC108698300	2.28834	-0.894672	2.52454	-0.35439	0.723047	1
LOC108698301	6.06511	-1.1093	1.2802	-0.866508	0.386212	0.635749
LOC108698303	6.29433	1.35321	0.986239	1.3721	0.170034	0.391501
LOC108698306	4.78253	1.91644	1.43319	1.33718	0.181162	0.407336
LOC108698307	4.38606	0.849545	1.09143	0.778377	0.436347	0.678228
LOC108698309	1.18285	-1.8139	3.30234	-0.549276	0.582816	1
LOC108698310	323.073	-0.273382	0.196302	-1.39266	0.163723	0.38317
LOC108698313	1279.41	-0.146398	0.140218	-1.04408	0.29645	0.547768
LOC108698315	2.90814	1.78625	1.7497	1.02089	0.307308	1
LOC108698316	1.57639	-2.26585	2.71732	-0.833854	0.404363	1
LOC108698318	8.80991	2.35559	1.13454	2.07626	0.0378704	0.143523
LOC108698319	3.85074	0.912501	1.34121	0.680355	0.49628	0.72719
LOC108698320	7.5324	1.50307	1.09235	1.376	0.168823	0.389844
LOC108698321	2.38952	-1.12338	1.5201	-0.739017	0.459897	1
LOC108698322	9.57729	1.71922	0.780725	2.20208	0.02766	0.115269
LOC108698323	1340.39	0.200802	0.163953	1.22475	0.220669	0.459339
LOC108698325	33.9818	0.932072	0.482767	1.93069	0.0535216	0.182141
LOC108698326	2.21921	-0.215013	1.9846	-0.108341	0.913725	1
LOC108698327	2.59862	-0.110166	1.57966	-0.0697407	0.9444	1
LOC108698329	663.482	-0.209592	0.156079	-1.34286	0.179317	0.404502
LOC108698330	4.15015	-0.355107	1.55647	-0.228149	0.819531	0.920279
LOC108698332	20.1237	0.80736	0.824181	0.979591	0.327288	0.578736
LOC108698334	1038.29	0.0731206	0.111672	0.654777	0.512611	0.737809
LOC108698335	41.3908	1.88216	0.478368	3.93453	8.33587e-05	0.00128011
LOC108698336	20.8636	1.38603	0.865503	1.60142	0.109284	0.2936
LOC108698337	1.11764	3.2396	3.30504	0.9802	0.326987	1
LOC108698338	1.07108	3.57462	3.16864	1.12812	0.259269	1
LOC108698339	128.676	-0.963724	0.270045	-3.56875	0.000358689	0.00421236
LOC108698340	14.1554	1.65636	0.690087	2.40022	0.016385	0.0788542
LOC108698341	7.41348	2.59965	1.07857	2.41027	0.0159406	0.0773108
LOC108698343	6.6193	3.19378	1.11344	2.86838	0.00412575	0.028602
LOC108698344	20.13	2.29605	0.585859	3.91912	8.88723e-05	0.00134992
LOC108698345	3.10009	-3.21511	1.77056	-1.81587	0.0693902	1
LOC108698346	3.00442	0.205771	1.48412	0.138648	0.889728	1
LOC108698348	0.860864	-0.89432	2.78266	-0.32139	0.747915	1
LOC108698350	18.5547	-1.875	0.840987	-2.22952	0.0257792	0.109806
LOC108698352	1.18367	-2.62445	2.54929	-1.02948	0.303253	1
LOC108698355	1.32725	0.354985	2.24237	0.158308	0.874214	1
LOC108698356	3.97235	-3.55502	1.76439	-2.01488	0.0439174	0.158989
LOC108698359	43.542	1.50048	0.375755	3.99322	6.51808e-05	0.00105462
LOC108698363	45.9139	-3.8695	0.496515	-7.79333	6.52674e-15	1.14552e-12
LOC108698364	1.123	0.857431	2.75542	0.31118	0.755664	1
LOC108698365	1.74819	-0.120051	1.81563	-0.066121	0.947281	1
LOC108698366	47.5722	-4.63782	0.637092	-7.27967	3.34628e-13	4.5649e-11
LOC108698367	307.094	2.78191	0.276244	10.0705	7.46257e-24	4.66962e-21
LOC108698369	216.535	-0.158987	0.212809	-0.747085	0.455012	0.695026
LOC108698370	1055.53	-0.381062	0.151336	-2.51798	0.011803	0.0622458
LOC108698373	77.6643	-0.333087	0.338911	-0.982815	0.325699	0.577058
LOC108698374	9.11628	1.55859	1.33716	1.1656	0.243776	0.488329
LOC108698375	36.2026	-0.358548	0.436523	-0.821373	0.411434	0.658917
LOC108698376	16.3369	0.743975	0.713637	1.04251	0.297174	0.54836
LOC108698377	402.046	-0.12364	0.185685	-0.665857	0.505503	0.732565
LOC108698386	2221.78	-0.326632	0.136169	-2.39873	0.0164519	0.0790439
LOC108698387	1.96061	4.31844	2.44169	1.76863	0.0769554	1
LOC108698393	164.328	-0.227	0.272806	-0.832095	0.405355	0.654058
LOC108698396	18.7376	-4.18744	0.74562	-5.61604	1.95378e-08	1.01696e-06
LOC108698399	132.329	0.971465	0.264807	3.66857	0.000243908	0.00306445
LOC108698402	35.5999	1.16618	0.511229	2.28113	0.0225409	0.0996877
LOC108698411	1627.89	-0.252833	0.15807	-1.5995	0.10971	0.294359
LOC108698412	316.066	0.165617	0.211411	0.783388	0.4334	0.676015
LOC108698413	2.6163	2.01001	1.82381	1.1021	0.270419	1
LOC108698414	3.38802	3.63506	1.8491	1.96586	0.0493151	1
LOC108698415	3.95856	1.30951	1.36223	0.961298	0.336403	0.588047
LOC108698416	3.1671	1.29862	1.66891	0.778123	0.436497	1
LOC108698420	2.03591	0.976576	2.06864	0.472087	0.636865	1
LOC108698422	765.437	0.466543	0.150893	3.09188	0.00198896	0.0165643		X
LOC108698424	2.30054	0.956365	3.93275	0.24318	0.807866	1
LOC108698428	388.783	0.414547	0.195663	2.11868	0.0341176	0.133266
LOC108698429	2.12234	1.42013	2.07982	0.682814	0.494725	1
LOC108698430	25.2179	-0.837892	0.600593	-1.39511	0.162983	0.381935
LOC108698434	148.945	0.00545172	0.235268	0.0231724	0.981513	0.993385
LOC108698435	2.05624	-1.30335	1.83209	-0.711404	0.476834	1
LOC108698436	6.87327	-1.16521	1.34802	-0.864383	0.387377	0.636831
LOC108698439	42.0679	-0.513037	0.4135	-1.24072	0.21471	0.451835
LOC108698443	7.13166	1.32044	1.28496	1.02761	0.304134	0.5548
LOC108698445	4882.57	-0.341293	0.125747	-2.71413	0.00664498	0.0406696
LOC108698446	135.56	0.0772269	0.346773	0.222702	0.823767	0.922548
LOC108698449	100.833	-0.363749	0.262845	-1.38389	0.166392	0.386696
LOC108698451	325.871	-0.141728	0.212588	-0.666679	0.504977	0.732292
LOC108698454	2.96361	3.14997	2.07142	1.52069	0.128339	1
LOC108698462	87.6608	0.921413	0.333256	2.76488	0.00569435	0.0364155
LOC108698465	4.64928	-0.742777	1.20002	-0.618972	0.535935	0.754824
LOC108698472	1.13195	3.44163	3.03357	1.13451	0.256579	1
LOC108698474	488.475	0.068029	0.196746	0.34577	0.729515	0.873771
LOC108698479	23.1744	0.0891773	0.546577	0.163156	0.870396	0.944279
LOC108698480	159.166	0.101783	0.217239	0.468531	0.639405	0.82495
LOC108698483	611.225	0.606553	0.149687	4.05215	5.07487e-05	0.00085876
LOC108698486	17.1082	-0.16764	0.788918	-0.212493	0.831723	0.926381
LOC108698487	11.9855	0.63431	0.807688	0.78534	0.432254	0.675168
LOC108698488	53.0756	0.29686	0.310645	0.955625	0.339262	0.590877
LOC108698490	2.75429	0.5805	1.70193	0.341084	0.73304	1
LOC108698491	237.985	-0.696253	0.234631	-2.96743	0.00300297	0.0225627
LOC108698494	2.33787	-0.311968	1.80563	-0.172775	0.862828	1
LOC108698496	54.032	-0.549092	0.426594	-1.28716	0.19804	0.430478
LOC108698497	91.4836	0.516266	0.32634	1.58198	0.113653	0.301344
LOC108698499	883.323	-0.133825	0.14581	-0.917805	0.358721	0.609421
LOC108698502	1079.92	-0.0936016	0.151477	-0.617926	0.536624	0.75519
LOC108698509	2.67222	-1.33032	1.89877	-0.700623	0.483538	1
LOC108698511	19.9043	-1.0112	0.593881	-1.7027	0.0886243	0.255684
LOC108698512	7.09788	-1.38072	1.10955	-1.2444	0.213353	0.449869
LOC108698515	17.6218	0.307576	0.58563	0.525206	0.59944	0.799068
LOC108698516	47.241	-0.140062	0.402959	-0.347584	0.728153	0.873129
LOC108698518	269.907	-0.171344	0.165453	-1.0356	0.300388	0.550995
LOC108698519	613.308	-0.343303	0.177205	-1.93732	0.0527067	0.180351
LOC108698520	2.39553	-2.65062	1.6301	-1.62605	0.10394	1
LOC108698522	2.59949	1.53537	1.60825	0.954685	0.339737	1
LOC108698523	68.7688	0.340402	0.36717	0.927097	0.353876	0.605306
LOC108698525	1040.34	-0.310053	0.124045	-2.49951	0.0124364	0.0646737
LOC108698528	26.5429	1.25784	0.53494	2.35136	0.0187049	0.0872047
LOC108698529	231.163	0.0942828	0.226757	0.415787	0.677566	0.846587
LOC108698532	38.5747	-0.042332	0.377525	-0.11213	0.91072	0.963437
LOC108698533	86.7399	-0.498283	0.344127	-1.44796	0.147628	0.358109
LOC108698534	68.4434	0.722979	0.342102	2.11335	0.0345712	0.134382
LOC108698535	48.8702	-0.205915	0.381843	-0.539265	0.589704	0.792587
LOC108698538	16.0229	1.54228	0.720997	2.1391	0.0324279	0.128912
LOC108698539	8.47997	3.38849	1.2742	2.65931	0.00783017	0.0461379
LOC108698540	71.5828	0.34215	0.331793	1.03122	0.302439	0.553006		X
LOC108698541	9.64136	-0.389859	0.923683	-0.42207	0.672974	0.843937
LOC108698543	1288.65	0.386427	0.135105	2.8602	0.00423368	0.0291049
LOC108698544	460.262	-0.298191	0.214879	-1.38772	0.165223	0.385107
LOC108698547	17.4561	-0.00694252	0.696037	-0.00997435	0.992042	0.997103
LOC108698548	104.659	2.99949	0.333467	8.99486	2.36539e-19	7.73699e-17
LOC108698550	7.58496	2.33053	1.01295	2.30074	0.0214062	0.0961393
LOC108698551	15.0067	4.82293	2.56651	1.87917	0.0602207	0.197425
LOC108698553	22.8174	0.856888	0.621732	1.37823	0.168133	0.388749
LOC108698556	300.251	-0.472326	0.253085	-1.86628	0.0620026	0.201363
LOC108698561	3.27901	-1.16554	1.48418	-0.78531	0.432272	1
LOC108698563	112.786	1.4064	0.279036	5.0402	4.6505e-07	1.59928e-05
LOC108698564	54.981	-0.289313	0.34601	-0.836139	0.403076	0.651833
LOC108698565	1.33765	-0.561366	2.32368	-0.241586	0.809101	1
LOC108698570	211.79	1.28515	0.241251	5.32705	9.98233e-08	4.28214e-06
LOC108698571	67.7494	-0.489807	0.363473	-1.34757	0.177796	0.402332
LOC108698574	9.77664	0.831981	1.10315	0.754186	0.450738	0.691875
LOC108698575	99.8183	-0.27609	0.986521	-0.279862	0.779583	0.90054
LOC108698577	17.6174	-0.471548	0.601981	-0.783327	0.433435	0.676015
LOC108698579	41.5737	-0.636744	0.513536	-1.23992	0.215004	0.45219
LOC108698584	213.903	0.71742	0.197459	3.63327	0.000279854	0.00342196
LOC108698587	202.183	0.379847	0.191766	1.98079	0.047615	0.167898		X
LOC108698589	1.88731	4.76754	2.24764	2.12114	0.0339103	1
LOC108698590	15.1354	0.169209	0.777063	0.217754	0.827621	0.924202
LOC108698591	36.5403	0.140483	0.571528	0.245802	0.805835	0.913343
LOC108698592	1.25503	-1.80108	2.53772	-0.709723	0.477876	1
LOC108698593	48.8439	0.86016	0.415385	2.07075	0.0383819	0.144814
LOC108698597	34.2294	0.481322	0.42526	1.13183	0.257706	0.504246
LOC108698598	319.972	0.611646	0.206862	2.95678	0.00310866	0.0231333
LOC108698599	1.63119	-1.08718	2.45574	-0.442711	0.657975	1
LOC108698600	55.6245	-0.317092	0.384075	-0.8256	0.409031	0.656991
LOC108698601	1.17383	0.593159	2.09342	0.283345	0.776913	1
LOC108698602	18.4204	-1.39631	0.746585	-1.87026	0.0614476	0.200307
LOC108698603	63.5029	0.164574	0.42775	0.384745	0.700427	0.857451
LOC108698604	1163.27	-0.31849	0.216262	-1.4727	0.140831	0.347477
LOC108698608	163.744	0.839999	0.254199	3.3045	0.000951461	0.0092617
LOC108698609	293.812	0.0658087	0.193034	0.340918	0.733166	0.876316
LOC108698611	2.27219	-0.822488	2.27029	-0.362283	0.71714	1
LOC108698613	2.14156	-3.22744	1.96744	-1.64043	0.100916	1
LOC108698614	849.124	-0.151408	0.141692	-1.06858	0.285261	0.53488
LOC108698616	143.878	-0.156914	0.242648	-0.646674	0.517843	0.74135		X
LOC108698617	44.8135	-0.0114492	0.524744	-0.0218187	0.982593	0.993919
LOC108698627	1.28895	1.78572	2.83434	0.63003	0.528675	1
LOC108698628	295.143	-0.0852707	0.221693	-0.384635	0.700508	0.857453
LOC108698629	201.768	-0.242985	0.217441	-1.11747	0.263791	0.511208
LOC108698631	69.2189	-0.214442	0.319198	-0.671814	0.501702	0.730335
LOC108698632	205.145	0.0139439	0.268983	0.0518391	0.958657	0.985253
LOC108698633	2.05906	-4.25446	2.13294	-1.99465	0.0460816	1
LOC108698634	365.931	-0.344915	0.184986	-1.86455	0.0622449	0.201877
LOC108698636	9.65325	0.375364	0.776943	0.48313	0.629003	0.818242		X
LOC108698639	1.12941	-2.87033	3.05671	-0.939027	0.347717	1
LOC108698641	2.9514	2.19456	2.06345	1.06354	0.287539	1
LOC108698646	6.58018	-0.271974	1.12404	-0.241961	0.808811	0.914515
LOC108698650	57.2969	0.105192	0.382712	0.274859	0.783425	0.902112
LOC108698651	3.42469	0.471281	1.60995	0.29273	0.769728	1
LOC108698652	84.4553	0.4299	0.319474	1.34565	0.178415	0.403079
LOC108698657	312.249	0.58734	0.192416	3.05245	0.0022698	0.0183519	X
LOC108698658	605.273	-0.325519	0.167534	-1.94301	0.052015	0.17877
LOC108698659	44.4467	-1.04274	0.417896	-2.49521	0.0125883	0.0651367
LOC108698662	1.33355	-0.0671813	2.76025	-0.0243388	0.980582	1
LOC108698663	535.629	0.486178	0.164575	2.95413	0.00313548	0.0233269
LOC108698666	45.8277	1.39647	0.445368	3.13554	0.0017154	0.0147084
LOC108698669	141.574	0.529941	0.329907	1.60633	0.108201	0.291533
LOC108698670	29.5542	0.497631	0.468731	1.06166	0.288392	0.538416
LOC108698671	23.1176	0.136452	0.53797	0.253642	0.799772	0.910531
LOC108698673	640.971	-0.385879	0.14812	-2.60518	0.00918261	0.0518642
LOC108698674	331.865	-0.204379	0.19863	-1.02894	0.303508	0.553903
LOC108698675	2.66704	1.43855	2.08922	0.688559	0.491101	1
LOC108698678	5.73323	-1.12742	1.36297	-0.827176	0.408137	0.656291
LOC108698681	2.5724	1.59877	1.86414	0.857647	0.391088	1
LOC108698682	49.4169	0.54407	0.4305	1.26381	0.206298	0.44081
LOC108698685	13.7406	1.34546	1.03921	1.29469	0.195426	0.426665
LOC108698691	492.737	-0.555756	0.133036	-4.17747	2.94771e-05	0.00054564
LOC108698694	2.1153	0.909455	1.81116	0.502141	0.615569	1
LOC108698695	1.1599	4.7409	3.41076	1.38998	0.164534	1
LOC108698698	1.45055	1.28791	2.08549	0.617555	0.536869	1
LOC108698702	220.163	-0.361649	0.250197	-1.44546	0.148329	0.359386
LOC108698705	59.8107	-0.0507999	0.372472	-0.136386	0.891516	0.95502
LOC108698707	45.2115	-1.06923	0.480604	-2.22476	0.0260972	0.110778
LOC108698708	4.42117	3.01307	1.48645	2.02702	0.0426601	0.155532
LOC108698711	2.58667	-0.84452	1.50329	-0.561783	0.574264	1
LOC108698712	251.195	-0.268886	0.253267	-1.06167	0.288385	0.538416
LOC108698714	39.0565	0.579448	0.473499	1.22376	0.221044	0.459612
LOC108698715	23.0326	1.17286	0.878615	1.3349	0.181909	0.408366
LOC108698716	270.872	-0.388053	0.186913	-2.07612	0.0378832	0.143534
LOC108698721	23.6819	1.11802	0.530468	2.1076	0.0350653	0.135765
LOC108698723	46.632	0.348547	0.40589	0.858722	0.390494	0.640272
LOC108698725	29.0513	-0.101713	0.560152	-0.181581	0.855912	0.937395
LOC108698731	16.5287	-0.602923	0.645382	-0.934212	0.350195	0.601575
LOC108698735	140.736	0.358804	0.262112	1.36889	0.171032	0.393022
LOC108698736	239.621	0.296383	0.202715	1.46207	0.143723	0.352006
LOC108698739	89.065	-0.0869377	0.30938	-0.281006	0.778706	0.900455
LOC108698741	1.76437	-0.261709	2.18074	-0.120009	0.904476	1
LOC108698753	153.997	0.000349126	0.265202	0.00131645	0.99895	0.999628
LOC108698755	1.28554	1.78471	2.58519	0.690357	0.48997	1
LOC108698757	474.641	0.35508	0.166915	2.1273	0.033395	0.131348
LOC108698758	1.04062	0.825394	2.8854	0.286058	0.774833	1
LOC108698759	2.80258	0.397544	1.5558	0.255523	0.798319	1
LOC108698763	3.23773	-0.725734	1.48309	-0.489341	0.624601	1
LOC108698766	169.493	0.469005	0.233661	2.00721	0.0447276	0.16097	X
LOC108698773	23.5033	0.940998	0.584643	1.60952	0.107502	0.290574
LOC108698775	510.448	0.179684	0.194728	0.922745	0.35614	0.607166		X
LOC108698782	436.397	-0.0903502	0.158611	-0.569635	0.568926	0.778006
LOC108698787	216.729	-0.0136981	0.214621	-0.0638245	0.94911	0.98087
LOC108698788	42.1691	0.645402	0.478737	1.34814	0.177615	0.402079
LOC108698789	11.2228	0.0245119	0.910235	0.0269292	0.978516	0.992383
LOC108698791	2.1879	0.316658	2.24854	0.140828	0.888006	1
LOC108698796	2.53445	2.06704	2.0001	1.03347	0.301384	1
LOC108698799	438.181	-0.340175	0.186695	-1.82209	0.0684418	0.214997
LOC108698800	3.91386	0.851626	1.15936	0.734567	0.462603	0.700983
LOC108698801	2.43704	1.42645	1.72579	0.826546	0.408494	1
LOC108698802	2.80406	-1.43852	1.51756	-0.94792	0.34317	1
LOC108698803	509.433	0.297841	0.177884	1.67435	0.094061	0.265332
LOC108698804	20.8056	-0.812235	0.509638	-1.59375	0.110993	0.296786
LOC108698806	1.6074	2.65605	3.001	0.885055	0.376127	1
LOC108698808	35.0343	-0.0345827	0.52901	-0.0653724	0.947878	0.9803
LOC108698813	67.8363	-0.355041	0.309372	-1.14762	0.251126	0.496592
LOC108698814	2.18833	-3.91191	2.07353	-1.88659	0.0592156	1
LOC108698815	523.035	0.269111	0.172478	1.56027	0.118697	0.310362		X
LOC108698817	18.6873	-0.100374	0.625628	-0.160437	0.872537	0.945563
LOC108698820	1601.84	0.0665182	0.133832	0.497026	0.619171	0.812316
LOC108698821	6.00301	0.732328	0.934268	0.783852	0.433127	0.675856
LOC108698822	94.7092	0.211938	0.302279	0.701134	0.483219	0.71681
LOC108698823	181.974	0.613429	0.253974	2.41532	0.0157215	0.0765182
LOC108698825	22.5706	-0.396971	0.563455	-0.704531	0.481102	0.715182
LOC108698829	69.2176	0.0682668	0.420172	0.162474	0.870933	0.944593
LOC108698830	75.6536	0.372364	0.306603	1.21448	0.224564	0.46439
LOC108698831	3.90214	-0.75656	1.31865	-0.573739	0.566144	0.776381
LOC108698835	73.2373	0.171274	0.309347	0.553664	0.579809	0.785781		X
LOC108698836	39.8971	0.874521	0.427411	2.04609	0.0407474	0.150735
LOC108698837	404.341	0.219477	0.160405	1.36827	0.171227	0.393249
LOC108698839	13.9366	2.21369	0.73091	3.02868	0.00245622	0.0195396
LOC108698840	176.812	-0.245216	0.257455	-0.952461	0.340863	0.592266
LOC108698843	4.86707	0.67372	1.19864	0.562072	0.574067	0.782147
LOC108698846	1.11491	0.33068	2.65665	0.124473	0.900941	1
LOC108698851	6.41912	-1.19024	1.01973	-1.16721	0.243125	0.487707
[truncated: 33,722 more rows]

## Sheet: MB_st44v61
geneSymbol	baseMean	log2FoldChange	lfcSE	stat	pvalue	padj	NPC Enriched	IN Enriched
12S ribosomal RNA	77.0496	-0.436801	0.317334	-1.37647	0.168676	0.31242
16S ribosomal RNA	27009	0.0171259	0.150705	0.113638	0.909525	0.952779
1a11.L	6.53734	-2.20775	1.04134	-2.1201	0.0339977	0.0911111
42sp43.L	1.59716	0.873087	2.00783	0.434841	0.663678	1
42sp50.L	4.39422	1.40122	1.37397	1.01983	0.307808	0.480626		X
ATP6	422.192	0.839792	0.18192	4.61626	3.90709e-06	3.54024e-05
ATP8	24.8953	1.09796	0.486674	2.25606	0.024067	0.0691838
COX1	19338.1	0.41182	0.117481	3.50541	0.000455902	0.00243764
COX2	3788.69	1.15282	0.20301	5.67863	1.35781e-08	2.01562e-07
COX3	5527.09	0.798128	0.172682	4.62194	3.80166e-06	3.45893e-05
CYTB	29.3519	-0.162613	0.558465	-0.291179	0.770915	0.868574
LOC100036663.S	1.80625	-2.25892	2.29934	-0.982419	0.325894	1
LOC100036800.S	1.12252	0	3.42063	0	1	1
LOC100036803	679.422	-0.366353	0.154804	-2.36656	0.0179541	0.0546291
LOC100036818	4.79567	-0.404841	1.32764	-0.304933	0.760417	0.861748
LOC100036823	5.10454	-2.37415	1.5838	-1.49902	0.133868	0.262998
LOC100036824	1.67297	-4.76394	2.73342	-1.74285	0.0813595	1
LOC100036831	399.79	-0.0335239	0.193389	-0.17335	0.862377	0.92547
LOC100036845	5.87299	-0.623182	1.64377	-0.379119	0.7046	0.824468
LOC100036845.L	1.28729	-1.58015	2.76672	-0.571126	0.567914	1
LOC100036869	96.7205	0.856598	0.318776	2.68715	0.00720655	0.0256231
LOC100036872	9.09164	1.14353	0.899918	1.2707	0.203835	0.358856
LOC100036883	1.51176	1.15261	3.03046	0.38034	0.703693	1
LOC100036897	1.13502	2.77693	2.55682	1.08609	0.277441	1
LOC100036907.L	49.3918	1.41849	0.487598	2.90915	0.00362416	0.0143746
LOC100036910	700.899	-0.356472	0.24966	-1.42783	0.153341	0.290975
LOC100036915	267.056	-0.733504	0.204416	-3.58829	0.00033286	0.00185061
LOC100036932	4.0773	5.1001	1.61985	3.14851	0.00164108	0.00736166
LOC100036952	22.047	2.41687	0.576076	4.1954	2.72394e-05	0.000201405
LOC100036976	10.7305	1.98927	0.855104	2.32635	0.0199999	0.0597372
LOC100036994	368.702	1.23631	0.187623	6.58934	4.41779e-11	9.50779e-10
LOC100036997	31.1515	1.11573	0.527201	2.11633	0.0343167	0.0918146
LOC100037001	448.341	0.35511	0.174843	2.03103	0.0422524	0.108216
LOC100037016	18.1945	-1.31779	0.848365	-1.55333	0.120344	0.242734
LOC100037047	1.04821	-2.18717	2.76899	-0.789882	0.429596	1
LOC100037090	242.52	0.0692026	0.222461	0.311077	0.755742	0.859047
LOC100037108	629.886	0.968235	0.173428	5.58294	2.36492e-08	3.36342e-07
LOC100037118	31.0167	0.730093	0.597925	1.22104	0.222069	0.381938
LOC100037145	10.6997	1.68681	0.908944	1.85579	0.0634831	0.148746
LOC100037177	60.8503	5.06303	0.725914	6.97469	3.06544e-12	7.66658e-11
LOC100037180	9.87896	0.611023	1.11792	0.54657	0.584674	0.733274
LOC100037204	2.1138	-1.16418	2.41323	-0.482416	0.62951	1
LOC100037213	418.489	-1.88207	0.21517	-8.7469	2.19291e-18	1.15491e-16
LOC100037217	31.4085	-4.65387	0.866069	-5.37356	7.71984e-08	1.00231e-06
LOC100037226	194.274	-0.307203	0.256576	-1.19732	0.231182	0.39306
LOC100037235	62.35	-0.473264	0.352742	-1.34167	0.179703	0.327274
LOC100037903.1	2.65372	-4.95931	1.76824	-2.80467	0.00503684	0.0190033
LOC100049113	12.4194	-0.919897	0.879251	-1.04623	0.295456	0.467073
LOC100049116	351.463	-0.424466	0.17893	-2.37225	0.0176802	0.0539389
LOC100049121	324.809	1.33765	0.236523	5.6555	1.55397e-08	2.28266e-07
LOC100049127	61.3578	0.31004	0.319195	0.971317	0.33139	0.505805
LOC100049136	1713.67	-0.974996	0.201755	-4.83257	1.34783e-06	1.35199e-05
LOC100049756	2.39611	-2.81197	2.18454	-1.28721	0.198021	1
LOC100101277	216.212	-0.882327	0.205236	-4.29909	1.71502e-05	0.000133349
LOC100101281	49.6533	-0.504326	0.361678	-1.39441	0.163195	0.304877
LOC100101282	7.8298	1.5596	1.08002	1.44405	0.148726	0.284509
LOC100101283	87.7329	-0.00363633	0.344545	-0.010554	0.991579	0.996134		X
LOC100101333	88.1008	-0.33896	0.361877	-0.936674	0.348926	0.523788
LOC100125664	5.57346	2.10391	1.21417	1.73279	0.0831325	0.182646
LOC100125668	243.621	-0.666511	0.313533	-2.12581	0.0335194	0.0900639
LOC100126603	30.4162	-1.21965	0.481553	-2.53273	0.0113177	0.037325
LOC100126627	1.39741	3.97331	2.70057	1.47128	0.141214	1
LOC100126638	30.7823	-0.903829	0.473796	-1.90763	0.0564386	0.135729
LOC100126648	82.0987	-0.235103	0.338312	-0.69493	0.487099	0.653023
LOC100126651	20.8759	0.244611	0.593991	0.41181	0.680479	0.806693
LOC100126657	3.31009	-3.1873	1.77123	-1.79949	0.0719418	0.163821
LOC100126660	98.5135	0.539438	0.30332	1.77845	0.0753305	0.169437
LOC100127249	1.29718	-2.06146	3.0223	-0.682083	0.495187	1
LOC100127277	27.339	-6.63169	1.26786	-5.23063	1.68932e-07	2.05421e-06
LOC100127280	27.1517	1.25233	0.515515	2.42927	0.0151293	0.0474803
LOC100127286	21.1439	-0.343795	0.603284	-0.569873	0.568764	0.721096
LOC100127287	2.3652	1.08718	1.8916	0.574743	0.565465	1
LOC100127296	104.984	-0.879692	0.294109	-2.99103	0.00278034	0.0114715
LOC100127300	119.273	0.437024	0.280701	1.5569	0.119493	0.241648
LOC100127316	54.3099	1.34237	0.397024	3.38108	0.000722025	0.00362033
LOC100127323	118.065	0.135592	0.313023	0.433168	0.664893	0.794579
LOC100127329	1961.72	0.166426	0.10094	1.64876	0.0991967	0.209384
LOC100127334	2.94365	0.19086	2.28554	0.0835075	0.933448	0.965127
LOC100127794.L	21.031	2.5636	0.968886	2.64593	0.00814676	0.0283456
LOC100135120.L	105.348	-0.573206	0.285699	-2.00633	0.044821	0.113373
LOC100135146.L	3.77925	-1.08122	1.822	-0.593427	0.552896	0.708351
LOC100135146.S	4.55752	2.00765	1.25559	1.59898	0.109825	0.226551
LOC100137612	78.0131	-0.5869	0.309123	-1.89859	0.0576178	0.137995
LOC100137633	4.06569	1.2364	1.73996	0.710592	0.477337	0.644844
LOC100137634	228.452	-0.19175	0.233413	-0.821504	0.411359	0.585634		X
LOC100137643	3.66984	1.08437	1.61396	0.671869	0.501667	0.665712
LOC100137665	4.49022	-2.61704	1.52143	-1.72011	0.0854116	0.186684
LOC100137672	23.0817	-0.167155	0.610049	-0.274002	0.784083	0.877484
LOC100137672.S	111.763	2.83345	0.273862	10.3463	4.35121e-25	3.98478e-23
LOC100137678	2.38663	0.0845394	2.04076	0.0414254	0.966957	1
LOC100137691	39.5655	-1.91442	0.458695	-4.17363	2.99779e-05	0.000219758
LOC100137715	1.23852	-1.77651	3.04261	-0.583878	0.559302	1
LOC100145345.L	6.88824	-0.816135	1.06844	-0.763857	0.444953	0.616136
LOC100145450.S	138.558	-0.307263	0.243783	-1.2604	0.207526	0.363819
LOC100145473.S	0.833656	-0.770923	4.13755	-0.186323	0.852191	1
LOC100145531.L	21.7098	-0.753103	0.621104	-1.21252	0.225312	0.385838
LOC100145533.L	32.2171	1.35135	0.549135	2.46088	0.0138599	0.0441768
LOC100158280	5.42251	0.0616981	1.52512	0.0404547	0.967731	0.983538
LOC100158299	288.377	-0.748399	0.196315	-3.81223	0.000137717	0.000856899
LOC100158305.L	8.71505	5.44156	1.67448	3.24971	0.00115523	0.00544148
LOC100158314	1.83778	0	2.53664	0	1	1
LOC100158321	104.844	-0.088468	0.386389	-0.228961	0.818899	0.899432
LOC100158331	34.784	-0.339527	0.558853	-0.607543	0.543491	0.70046
LOC100158340	743.019	-0.415363	0.161354	-2.57424	0.010046	0.0337514
LOC100158347	217.995	0.28805	0.21817	1.3203	0.186735	0.336684
LOC100158361	288.106	0.438051	0.236507	1.85217	0.0640016	0.14966
LOC100158366	15.9368	-4.52815	0.945503	-4.78915	1.6749e-06	1.64673e-05
LOC100158370	143.857	-0.193216	0.250509	-0.771291	0.440534	0.612298
LOC100158382	120.119	-1.32031	0.252873	-5.22123	1.77737e-07	2.14955e-06
LOC100158389	1.73351	-4.31099	2.36299	-1.82438	0.0680951	1
LOC100158394	231.721	-0.602648	0.181809	-3.31473	0.000917309	0.0044481
LOC100158410.L	92.5139	-0.750491	0.306237	-2.45068	0.0142585	0.0451745
LOC100158433.L	41.2036	-3.32825	0.510248	-6.52281	6.90021e-11	1.45262e-09
LOC100158544.S	0.874413	-3.61571	3.08533	-1.1719	0.241236	1
LOC100170619.S	6.28503	0.905275	1.01373	0.893016	0.371848	0.546892
LOC100174801	6.93855	2.26848	1.18171	1.91966	0.0549006	0.132796
LOC100174804	476.356	0.327486	0.236524	1.38458	0.166182	0.308902
LOC100174808	2.73476	0.210514	2.1107	0.0997365	0.920554	0.958441
LOC100189560	139.165	1.24624	0.368779	3.37936	0.000726538	0.00363705
LOC100189574	115.074	-0.858002	0.28652	-2.99456	0.00274838	0.011364
LOC100191024	23.5494	-0.350307	0.636463	-0.550396	0.582048	0.731584
LOC100191026	282.476	-0.488043	0.180018	-2.71107	0.00670658	0.0241459
LOC100192369	14.3671	0.832825	0.685476	1.21496	0.224382	0.384737
LOC100217319	65.7123	-0.418292	0.775785	-0.539186	0.589758	0.737254
LOC100301958	51.8825	0.367633	0.416185	0.883339	0.377053	0.55231
LOC100335021	19.9947	-1.87657	0.624465	-3.00509	0.00265505	0.0110268
LOC100335115	1184.31	-1.78373	0.747371	-2.38667	0.0170017	0.0522199
LOC100337617	2.10475	-2.99049	2.45181	-1.21971	0.222576	1
LOC100379118	13.6341	-1.53299	0.878775	-1.74446	0.0810789	0.179249
LOC100462904	1013.69	-1.8781	0.174186	-10.7822	4.17856e-27	4.313e-25
LOC100462905	1008.19	-1.94016	0.231839	-8.36856	5.83281e-17	2.62792e-15
LOC100485017.S	1.81832	2.14405	2.23187	0.960648	0.336729	1
LOC100485044.L	3.34808	-4.66295	1.82691	-2.55237	0.0106993	0.0356129
LOC100485105.S	1.77263	3.55538	2.40761	1.47673	0.139749	1
LOC100485199-like.S	30.8131	1.69793	0.575586	2.94992	0.00317856	0.0128651
LOC100485290.L	44.2678	0.294986	0.40042	0.73669	0.461311	0.630848
LOC100485292.L	3.01744	-1.58014	2.28363	-0.691943	0.488973	0.654779
LOC100485470.1.L	24.7381	3.18721	0.588457	5.41621	6.0874e-08	8.05269e-07
LOC100485669.L	15.8257	3.05063	0.90307	3.37806	0.000729991	0.00365256
LOC100485723.L	2.07975	-1.63709	2.03346	-0.805079	0.420774	1
LOC100485829.S	15.4112	7.53236	1.34283	5.60933	2.03108e-08	2.92501e-07
LOC100485975.L	2.73812	3.13355	2.25507	1.38956	0.164664	0.306987
LOC100486127.S	10.3846	-1.65132	1.0229	-1.61436	0.106449	0.221139
LOC100486133.S	78.3363	1.09928	0.382671	2.87264	0.00407053	0.0158637
LOC100486352-like.S	1.09401	-0.770947	3.03048	-0.254398	0.799188	1
LOC100486380.L	6.92637	-2.37656	1.23104	-1.93052	0.0535422	0.130225
LOC100486434-like.L	1.44457	0.199942	2.37051	0.0843455	0.932782	1
LOC100486734-like.L	4.57354	-2.00433	1.54421	-1.29796	0.194301	0.346539
LOC100486734-like.S	4.00247	-1.60667	1.45339	-1.10546	0.268959	0.437035
LOC100486894.S	1.72942	-0.495921	1.75791	-0.282108	0.77786	1
LOC100486966.L	5.31315	0.670855	1.21364	0.552764	0.580425	0.73049
LOC100487224.L	74.0552	1.62279	0.459544	3.53131	0.000413501	0.00223735
LOC100487262.S	70.1119	-0.456428	0.294964	-1.5474	0.121766	0.245023
LOC100487412.L	1.96313	-1.58656	2.49587	-0.635674	0.524989	1
LOC100487482.S	1.60969	4.58159	2.47275	1.85283	0.0639063	1
LOC100487499.S	223.009	-0.46461	0.196504	-2.36438	0.0180604	0.0548711
LOC100487668.L	11.814	-1.43068	0.782788	-1.82768	0.0675983	0.156143
LOC100487740.S	1.99313	-1.09848	2.19627	-0.500158	0.616964	1
LOC100488087.L	23.9403	0.167742	0.587455	0.28554	0.775231	0.871623
LOC100488177.S	2.37007	-3.6879	1.88852	-1.9528	0.0508433	1
LOC100488227.L	1.6941	0	2.57458	0	1	1
LOC100488333.L	16.8424	-1.1583	0.790229	-1.46578	0.142709	0.276061
LOC100488348.S	4.38502	-2.15992	1.34487	-1.60604	0.108264	0.22402
LOC100488442.S	23.1953	0.425709	0.583789	0.729218	0.465868	0.63455
LOC100488486.L	2.634	-0.558157	1.50623	-0.370566	0.710961	0.828758
LOC100488567.L	125.525	0.0789103	0.266507	0.296091	0.767161	0.866273
LOC100488577.L	3.49837	-2.58527	2.15738	-1.19834	0.230785	0.392586
LOC100488626.L	45.82	-1.7692	0.399951	-4.42354	9.70959e-06	7.9994e-05
LOC100488689.S	100.338	-0.90987	0.384469	-2.36656	0.0179542	0.0546291
LOC100488697.L	4.6125	3.44883	1.78162	1.93578	0.0528945	0.128975
LOC100488701.S	2.60916	3.3938	1.95308	1.73767	0.0822691	0.18124
LOC100488828.L	1.26721	-2.56835	2.63795	-0.973615	0.330248	1
LOC100488885-like.L	356.046	-0.289074	0.170266	-1.69778	0.0895501	0.193903
LOC100489122.L	11.0571	0.609071	0.872808	0.697829	0.485284	0.651762
LOC100489188.L	6.96266	-2.42437	1.25896	-1.92569	0.0541426	0.131312
LOC100489326.S	7.44812	-0.243186	1.06756	-0.227797	0.819804	0.89968
LOC100489554.L	1.12004	0	3.36726	0	1	1
LOC100489764.L	2.14716	-3.73829	2.10833	-1.77311	0.0762113	1
LOC100489771.S	70.2018	-0.0722332	0.358047	-0.201742	0.840118	0.912069
LOC100489773-like.S	23.4693	-0.239145	0.586147	-0.407995	0.683277	0.808803
LOC100489832.L	1.18282	-3.46371	2.5926	-1.336	0.18155	1
LOC100489882.L	1.44018	2.55637	2.67142	0.956934	0.338601	1
LOC100490018.L	3.80207	-4.57908	1.8857	-2.42832	0.015169	0.0475758
LOC100490389-like.L	1.6631	1.69927	2.35072	0.722872	0.469759	1
LOC100490462.L	3.07423	3.14011	1.81565	1.72946	0.0837264	0.183677
LOC100490530.L	60.0348	-0.682831	0.321091	-2.12659	0.0334538	0.089927
LOC100490553.S	1.50608	4.17853	2.65845	1.57179	0.115999	1
LOC100490559.S	31.3141	0.299456	0.440071	0.680473	0.496205	0.660814
LOC100490741.L	36.4257	1.0804	0.48747	2.21634	0.0266683	0.0751564
LOC100490918.L	1.70406	-4.25213	2.319	-1.83361	0.0667125	1
LOC100490937.L	1.25765	2.36688	2.42108	0.977611	0.328267	1
LOC100491211.L	8.09842	-0.425101	1.1616	-0.365962	0.714393	0.83117
LOC100491437-like.L	22.8796	-3.3634	0.946087	-3.55507	0.000377881	0.0020707
LOC100491450.S	8.72397	0.34531	0.838887	0.411629	0.680611	0.806707
LOC100491454.L	1.79952	0.718189	1.95236	0.367858	0.712979	1
LOC100491587.L	2.95658	1.74723	1.89108	0.923933	0.355521	0.53054
LOC100491616-like.L	9.2335	1.42133	0.907086	1.56692	0.117133	0.237825
LOC100491629.S	1.38906	1.1733	2.41048	0.486752	0.626434	1
LOC100491907.S	2.72798	1.85661	1.4627	1.26931	0.204331	0.359566
LOC100491930.L	8.12813	1.07307	1.08502	0.988987	0.322669	0.496967
LOC100491939.S	225.955	0.439833	0.193474	2.27335	0.0230051	0.0667279
LOC100492080.1	1.62793	-0.299712	2.25176	-0.133101	0.894113	1
LOC100492197-like.L	330.819	0.229602	0.18178	1.26308	0.206561	0.362508
LOC100492420.S	2.15204	0.45174	1.80922	0.249687	0.802829	1
LOC100492487.S	145.206	0.705634	0.322035	2.19117	0.0284394	0.0790718
LOC100492639-like.S	2.64606	-4.52195	1.78122	-2.53869	0.0111269	0.0367949
LOC100492643.L	1.45606	2.57665	2.41748	1.06584	0.286495	1
LOC100492708	36.0038	0.324355	0.464993	0.697549	0.485459	0.651884
LOC100492859.S	1.80366	0.998171	2.04658	0.487725	0.625744	1
LOC100492885.L	63.649	0.674503	0.352228	1.91497	0.0554969	0.133976
LOC100492888-like.L	19.8296	2.61883	0.681232	3.84425	0.000120923	0.000765211
LOC100492899.L	3.09139	-4.53028	2.05927	-2.19994	0.0278108	0.0776248
LOC100492951-like.S	238.189	-0.0766513	0.247224	-0.310048	0.756525	0.859546
LOC100493071.L	4.49678	0.796507	1.71911	0.463325	0.643131	0.778121
LOC100493076.L	1.01171	0.927813	3.1846	0.291343	0.770789	1
LOC100493184.L	1.51629	-0.860535	2.15842	-0.398688	0.690123	1
LOC100493237.L	3.69492	3.84807	1.76999	2.17407	0.0297001	0.0817447
LOC100493283-like.L	33.6461	-1.05307	0.481727	-2.18604	0.028813	0.0798422
LOC100493356.L	1.08105	0.803243	2.63274	0.305098	0.760292	1
LOC100493381.L	1.41802	0.218268	2.64718	0.0824528	0.934287	1
LOC100493382.L	79.6197	0.336608	0.317789	1.05922	0.289501	0.460024
LOC100493512.1	1.05939	-0.770947	3.07531	-0.250689	0.802054	1
LOC100493618.L	1.87858	4.2078	2.27305	1.85117	0.0641452	1
LOC100493672.L	1.46381	0.190862	2.51158	0.0759929	0.939425	1
LOC100493745.L	268.344	-0.35355	0.208047	-1.69938	0.0892477	0.193384
LOC100493912.S	23.0965	0.703055	0.655298	1.07288	0.283325	0.453126
LOC100493955.L	1.47515	-2.38119	2.9559	-0.805571	0.42049	1
LOC100493968.1.L	32.127	2.59385	0.591046	4.38858	1.14091e-05	9.23928e-05
LOC100494033.L	4.86352	1.32859	1.29057	1.02946	0.303263	0.47558
LOC100494136.L	2.84899	0.663513	1.87	0.35482	0.722725	0.836417
LOC100494386.L	14.9147	0.574098	0.592938	0.968225	0.332932	0.507379
LOC100494476.L	69.0303	0.797542	0.349099	2.28458	0.0223377	0.065141
LOC100494536.S	1.78395	-1.05781	2.05179	-0.515554	0.606166	1
LOC100494604.L	1.29805	-0.770938	2.8288	-0.272532	0.785213	1
LOC100494943.L	1.45592	2.53446	2.92646	0.866052	0.386462	1
LOC100495010.S	96.5166	-0.513817	0.279325	-1.8395	0.0658422	0.152979
LOC100495012.S	1.978	1.12346	1.71952	0.653356	0.513527	1
LOC100495096.1	1.58538	0.217627	2.42712	0.0896647	0.928554	1
LOC100495101.S	1.88084	4.22783	2.30192	1.83666	0.0662603	1
LOC100495179.L	9.07719	2.5424	1.04985	2.42168	0.0154489	0.048282
LOC100495222.1.L	1.74412	3.51349	2.45833	1.42922	0.152941	1
LOC100495347.1	1.78709	-0.0557639	1.95328	-0.0285488	0.977224	1
LOC100495379.L	2.80824	-0.148971	1.61608	-0.0921803	0.926555	0.961576
LOC100495655-like.S	1.49785	3.51529	2.57223	1.36663	0.171741	1
LOC100495874.L	1.10773	-0.770956	3.47907	-0.221598	0.824627	1
LOC100495895.S	74.9572	0.250998	0.323718	0.77536	0.438127	0.610643
LOC100496010.S	9.55725	-0.653971	0.833639	-0.784478	0.43276	0.605871
LOC100496074-like.L	6.14292	-0.662433	1.00563	-0.658724	0.510073	0.67273
LOC100496137-like.L	37.5101	1.29038	0.560606	2.30175	0.021349	0.0629296
LOC100496293.L	1.50435	2.52442	2.68168	0.941356	0.346523	1
LOC100496329.S	10.5843	-3.28444	1.16016	-2.83103	0.00463988	0.0177113
LOC100496372.L	1.62932	4.23895	2.79776	1.51512	0.129742	1
LOC100496462.L	21.624	2.70194	0.700468	3.85734	0.00011463	0.000730922
LOC100496618.L	1.18367	1.8348	2.66264	0.689089	0.490768	1
LOC100496658.L	12.0359	1.78125	0.787142	2.26293	0.02364	0.0682295
LOC100496716.L	35.412	0.107518	0.634335	0.169497	0.865406	0.927036
LOC100496797-like.L	34.8152	-1.28208	0.577269	-2.22095	0.0263546	0.0744696
LOC100496797.L	129.416	-1.3152	0.314151	-4.18651	2.83276e-05	0.00020875
LOC100496837.S	4.42662	-0.966465	1.31982	-0.732269	0.464005	0.633073
LOC100496844.L	3.79966	0.322423	1.27225	0.253428	0.799937	0.888105
LOC100496870.L	5.09047	-5.72086	1.64433	-3.47915	0.000502999	0.00265269
LOC100496873.L	2.63081	0.213787	2.03215	0.105202	0.916215	0.956073
LOC100496891.S	3.5588	-0.114672	1.43149	-0.0801067	0.936152	0.96631
LOC100496975.L	2.08035	5.19557	2.3803	2.18274	0.0290549	1
LOC100496975.S	40.265	-0.287706	0.415972	-0.691647	0.489159	0.654906
LOC100497020.L	9.80164	-1.25196	0.961475	-1.30212	0.192874	0.344772
LOC100497184.L	247.777	0.0295234	0.250351	0.117928	0.906125	0.950768
LOC100497309.L	3.92063	-3.81975	2.01411	-1.8965	0.0578944	0.138403
LOC100497432.L	1.21096	1.98035	3.45369	0.573401	0.566373	1
LOC100497489.S	10.8505	0.678367	0.775788	0.874423	0.381888	0.557251
LOC100497500.S	3.32529	2.13975	1.47464	1.45104	0.14677	0.281833
LOC100497556.L	4.0537	-3.61188	1.73348	-2.08361	0.037196	0.0977888
LOC100497703.S	13.2074	1.98176	0.757721	2.61543	0.00891158	0.0305032
LOC100497709.L	3.35406	-1.54772	1.60399	-0.964919	0.334586	0.509178
LOC100497740.L	4.90745	4.393	1.86267	2.35845	0.0183516	0.055597
LOC100497848.L	3.64308	1.58905	1.35934	1.16899	0.242407	0.406254
LOC100497909.S	11.4367	-2.95071	1.56578	-1.8845	0.0594972	0.141464
LOC100497953.L	13.5743	-0.263544	0.797743	-0.330362	0.741126	0.848769
LOC100498064.L	1.62266	0.317496	1.95306	0.162563	0.870862	1
LOC100498247.S	1.32667	-4.1133	2.53456	-1.62288	0.104615	1
LOC100498327.L	13.4315	0.357032	0.760648	0.469379	0.638799	0.774686
LOC100498450.S	1.78981	-3.17689	2.2417	-1.41718	0.156431	1
LOC100498477.L	2.42838	2.70369	2.07979	1.29998	0.193607	0.345644
LOC100498517.L	27.5458	0.161615	0.456391	0.354116	0.723252	0.836839
LOC100498590.S	1.75614	-0.63205	2.05635	-0.307366	0.758565	1
LOC100498594.S	1.78526	-2.38318	2.78002	-0.857255	0.391304	1
LOC100505442	178.084	0.768477	0.237444	3.23645	0.00121026	0.00566355
LOC100505446	429.898	0.129203	0.183968	0.702314	0.482483	0.64913
LOC100653495	126.748	-3.01358	0.349445	-8.62392	6.47002e-18	3.17958e-16
LOC100653497	74.2949	0.565773	0.330418	1.7123	0.0868423	0.189088
LOC100653500	4.51812	-1.95843	1.27091	-1.54096	0.123326	0.247228
LOC100653501	3.56339	-4.30939	1.87813	-2.29451	0.021761	0.063827
LOC100653508	185.27	0.430163	0.234364	1.83545	0.0664397	0.153985
LOC100653509	852.261	0.239983	0.167337	1.43413	0.151534	0.288539
LOC101027264	24.5611	-1.05703	0.691638	-1.5283	0.126438	0.251734
LOC101027269	34.9117	0.46211	0.417429	1.10704	0.268277	0.436364
LOC101027277	990.696	0.272396	0.150084	1.81496	0.0695304	0.159578
LOC101027278	1053.46	0.496055	0.145598	3.40701	0.000656781	0.00333491
LOC101027285	821.057	-0.00974493	0.159705	-0.0610184	0.951345	0.974146
LOC101027288	568.172	0.37468	0.176829	2.11888	0.0341002	0.0913384
LOC101027289	2.80304	-3.09045	2.05285	-1.50544	0.13221	0.260372
LOC101027292	28.7802	-0.873745	0.588597	-1.48445	0.137689	0.26881
LOC101027307	7.11365	1.15256	1.203	0.95807	0.338027	0.512279
LOC101027309	339.362	0.628796	0.200209	3.1407	0.00168546	0.00753865
LOC101243550	136.638	0.872934	0.291208	2.99763	0.00272084	0.0112631
LOC101243553	19.8509	0.208413	0.64321	0.32402	0.745923	0.851834
LOC101243554	31.6287	0.990048	0.738182	1.3412	0.179856	0.327426
LOC101730276.L	24.6016	2.66464	0.78711	3.38535	0.000710882	0.00357184
LOC101730314.L	54.3675	0.241643	0.421399	0.573429	0.566354	0.718996
LOC101730464.L	2.16342	2.42668	2.09868	1.15629	0.247562	1
LOC101730503.L	1.37771	0.227032	2.21601	0.102451	0.918399	1
LOC101730510.1	1.32833	3.91627	3.18157	1.23092	0.218351	1
LOC101730652.S	4.153	1.16878	1.29806	0.900403	0.367906	0.543138
LOC101730692.L	4.26171	0.578676	1.44159	0.401416	0.688114	0.812521
LOC101730710.L	1.75621	-2.56249	2.55809	-1.00172	0.316479	1
LOC101730711.S	28.7605	-1.28825	0.507283	-2.53951	0.0111007	0.0367269
LOC101730741.L	1.16715	-3.10533	3.14239	-0.988207	0.323051	1
LOC101730771-like.L	1.13079	0	3.64498	0	1	1
LOC101730771-like.S	1.11794	1.00751	2.77644	0.362879	0.716695	1
LOC101730807.L	1.1131	2.21631	2.8181	0.786458	0.431599	1
LOC101730911.S	1.48289	-1.57627	2.98398	-0.528243	0.597331	1
LOC101730997.L	1.78284	0.234657	2.48779	0.0943234	0.924852	1
LOC101730999.S	1.78917	0.794429	2.06423	0.384854	0.700346	1
LOC101731180.S	0.963278	2.55932	3.60379	0.710174	0.477596	1
LOC101731218.S	55.4173	1.08413	0.432773	2.50509	0.0122421	0.0398625		X
LOC101731372.S	1.29654	-0.760864	2.47616	-0.307276	0.758634	1
LOC101731405.L	20.0377	1.57215	0.632635	2.48509	0.0129519	0.0417115
LOC101731405.S	7.66646	0.970125	1.08022	0.898082	0.369142	0.544313
LOC101731454.L	5.44258	1.1571	1.1333	1.02099	0.307258	0.480155
LOC101731554.S	1.26387	2.81881	2.74611	1.02647	0.304668	1
LOC101731692.S	0.935673	-2.53972	3.32403	-0.76405	0.444838	1
LOC101731735.L	16.8778	2.33557	0.681582	3.42669	0.000610977	0.00313408
LOC101731735.S	32.3879	2.03469	0.503922	4.03771	5.39751e-05	0.000372491
LOC101731753.L	1.17494	-1.39453	2.73276	-0.510303	0.609839	1
LOC101731794.L	1.50411	1.03236	2.51765	0.410049	0.68177	1
LOC101732168.S	1.94601	-3.72499	2.16704	-1.71893	0.0856272	1
LOC101732174.L	3.98954	0.154926	1.39745	0.110863	0.911725	0.953916
LOC101732183.L	18.0364	0.53622	0.550114	0.974743	0.329688	0.504154
LOC101732265-like.L	2.99561	1.36513	1.84106	0.74149	0.458396	0.628254
LOC101732299.L	14.0667	1.31888	0.790984	1.6674	0.0954358	0.203464
LOC101732334	1.17496	3.40991	3.62396	0.940935	0.346738	1
LOC101732336.L	5.991	0.71449	0.995929	0.71741	0.473121	0.641345
LOC101732363.S	5.89145	0.892068	1.13431	0.786443	0.431608	0.604835
LOC101732646	36.4001	1.11988	0.484353	2.31212	0.0207713	0.0615619
LOC101732807.L	214.658	-0.298534	0.205155	-1.45517	0.145623	0.280329
LOC101732837.L	14.1126	0.67933	0.593822	1.144	0.252625	0.418673
LOC101732880.S	9.70706	1.61229	0.915562	1.76098	0.078241	0.174269
LOC101732886.L	1.45055	2.30389	2.36997	0.972118	0.330992	1
LOC101732896.L	1.55964	2.50403	2.75211	0.909857	0.362898	1
LOC101732913.L	0.854846	1.15261	3.9953	0.288492	0.772971	1
LOC101732945.L	58.8635	-1.00587	0.407413	-2.46891	0.0135525	0.0433923
LOC101733023.S	2.80282	3.08897	2.24644	1.37505	0.169117	0.312897
LOC101733142.L	1.64016	-4.57055	2.47223	-1.84876	0.0644927	1
LOC101733157.L	1.19327	-3.65283	2.56507	-1.42407	0.154427	1
LOC101733178.L	39.386	-0.258844	0.500659	-0.517006	0.605152	0.748965
LOC101733219.L	3.07624	0.790445	1.74349	0.453369	0.650283	0.783334
LOC101733221.L	3.92593	2.06092	1.33498	1.54378	0.122642	0.246226
LOC101733232.S	11.9182	-0.231346	0.804527	-0.287556	0.773687	0.870489
LOC101733399.1.L	2.04809	-1.56042	1.86852	-0.835108	0.403657	1
LOC101733496-like.L	74.4959	0.136924	1.00868	0.135745	0.892023	0.942956
LOC101733559.L	221.341	1.45601	0.283707	5.13207	2.8657e-07	3.31862e-06
LOC101733560.1.S	156.072	0.914745	0.284683	3.21321	0.0013126	0.00606158
LOC101733572.S	7.8143	-1.74609	1.06092	-1.64583	0.0997981	0.210439
LOC101733597.1.S	2.28967	-3.71007	1.99834	-1.85658	0.0633714	1
LOC101733718-like.L	9.66329	0.972999	0.867776	1.12126	0.262179	0.429615
LOC101733845.L	1.42257	-1.5923	2.50234	-0.636326	0.524564	1
LOC101733845.S	6.39957	-2.85885	1.49438	-1.91307	0.0557389	0.134431
LOC101733888.L	5.13467	-0.484412	1.2533	-0.386509	0.699119	0.820233
LOC101733911.L	2.34317	0.0294828	2.09703	0.0140593	0.988783	1
LOC101733911.S	1.78196	2.18921	2.20908	0.991004	0.321684	1
LOC101734116.1.L	15.5873	4.79745	1.14157	4.20252	2.63961e-05	0.000195967
LOC101734172.L	2.57025	-2.3805	2.26178	-1.05249	0.292575	0.463786
LOC101734280.L	16.5327	0.306274	0.658654	0.465001	0.641931	0.777187
LOC101734280.S	9.92314	1.30781	0.923622	1.41596	0.156788	0.295913
LOC101734284-like.L	4.53807	-0.738151	1.38287	-0.533784	0.593491	0.740293
LOC101734474.S	2.7582	-3.12284	1.72713	-1.80811	0.0705889	0.161539
LOC101734516.L	32.3796	0.371052	0.466576	0.795265	0.426459	0.599656
LOC101734522.1	3.2539	1.2161	1.41842	0.857363	0.391244	0.566181
LOC101734588.L	1.2265	-3.95971	2.815	-1.40665	0.159531	1
LOC101734605.L	29.4627	-1.39	0.627686	-2.21449	0.0267953	0.0754522
LOC101734643.L	6.23228	2.59457	1.2405	2.09155	0.0364791	0.096306	X
LOC101734771.L	1.74509	-2.66302	2.40176	-1.10878	0.267526	1
LOC101734788.S	4.13569	5.21397	1.86551	2.79492	0.00519118	0.0194737
LOC101734868.L	1.92437	1.82651	1.97521	0.924721	0.355111	1
LOC101734868.S	1.7433	1.57972	2.35019	0.672167	0.501477	1
LOC101734999.S	111.428	-0.23588	0.370335	-0.636936	0.524166	0.684617
LOC101735002.S	2.67447	2.59161	1.98222	1.30743	0.191067	0.342335
LOC101735009.S	56.6607	-1.06895	0.361841	-2.95419	0.00313491	0.0127235
LOC101735010.S	1.37886	1.97784	2.61719	0.755709	0.449824	1
LOC101735056.L	63.5704	1.125	0.359597	3.12851	0.00175695	0.00780861
LOC101735082.S	1.03736	1.76131	2.76838	0.636226	0.524629	1
LOC101735121-like.L	45.3019	-1.43143	0.483554	-2.96023	0.00307414	0.0125126
LOC101735124-like.S	15.7107	0.0964634	0.708603	0.136132	0.891717	0.942762
LOC105945384.S	1.5427	0.362131	2.17412	0.166565	0.867713	1
LOC105945417.L	57.7736	2.15816	0.480996	4.48686	7.22802e-06	6.14352e-05
LOC105945479	1.19756	-2.13227	3.16314	-0.674099	0.500248	1
LOC105945545.L	9.78012	1.68403	0.97168	1.73311	0.0830761	0.182552
LOC105945780.L	45.5232	2.24253	0.489113	4.58488	4.54243e-06	4.0457e-05
LOC105945786.L	1.16895	1.48286	2.95108	0.502481	0.615329	1
LOC105946022.S	16.4078	0.613692	0.665753	0.921801	0.356633	0.531652
LOC105946344.L	2.10135	-2.97372	2.2528	-1.32001	0.186831	1
LOC105946425.L	1.31267	3.72642	2.98692	1.24758	0.212185	1
LOC105946688.L	18.0122	0.590381	0.62242	0.948525	0.342862	0.517176
LOC105946688.S	1.86437	-0.13129	1.82402	-0.0719784	0.942619	1
LOC105946830.L	2.23297	1.04485	2.07552	0.503415	0.614673	1
LOC105946874.L	2.41668	-4.55325	2.04941	-2.22173	0.0263014	0.0743601
LOC105946897.L	3.2661	-2.10292	1.68913	-1.24497	0.213142	0.370946
LOC105947003.L	4.97262	1.47736	1.27142	1.16198	0.245244	0.409807
LOC105947173.L	1.35864	0.190849	3.11028	0.0613607	0.951072	1
LOC105947229.L	3.7421	-1.65106	1.46892	-1.124	0.261015	0.428025
LOC105947339.L	1.45291	-2.83241	2.66422	-1.06313	0.287723	1
LOC105947410.L	41.0229	0.337666	0.520414	0.648842	0.516441	0.67797
LOC105947450.S	65.9559	0.0540702	0.334935	0.161435	0.871751	0.931053
LOC105947790.L	25.2869	-1.21317	0.665709	-1.82238	0.0683977	0.15747
LOC105947790.S	3.01703	-3.14419	2.02262	-1.55451	0.120062	0.242386
LOC105947835.S	1.57562	0.873482	2.16155	0.404099	0.68614	1
LOC105947871.L	53.3669	1.42738	0.389134	3.6681	0.00024436	0.00141305
LOC105948127	1.31036	0	3.28974	0	1	1
LOC105948534	1.13184	-0.992174	2.67382	-0.37107	0.710586	1
LOC105948557.L	1.84961	0.94369	2.41281	0.391117	0.695711	1
LOC108695214	3.88939	-0.406529	1.29614	-0.313647	0.753789	0.857631
LOC108695216	2.45464	0.972773	1.52051	0.639767	0.522324	0.683165
LOC108695217	70.1249	1.09041	0.43715	2.49436	0.0126184	0.0408549
LOC108695218	2.31421	0.242406	1.84705	0.131239	0.895586	1
LOC108695221	29.3871	1.11581	0.524764	2.12631	0.0334771	0.0899817
LOC108695223	19.9007	1.37105	0.669854	2.0468	0.040678	0.104949
LOC108695227	258.705	0.377065	0.196132	1.92251	0.0545418	0.132052
LOC108695228	1.32893	-2.6641	2.44581	-1.08925	0.276042	1
LOC108695232	129.323	0.186553	0.320122	0.582757	0.560057	0.713822
LOC108695237	62.1398	1.40959	0.40048	3.51975	0.000431952	0.00232367
LOC108695239	8.78167	-0.977144	0.837739	-1.16641	0.24345	0.407537
LOC108695240	251.634	1.85347	0.216997	8.54144	1.32554e-17	6.34247e-16
LOC108695244	2.44716	0.814851	2.08215	0.391352	0.695537	0.817837
LOC108695247	540.177	0.604668	0.142466	4.24429	2.19282e-05	0.000165951
LOC108695251	174.641	-1.82834	0.238416	-7.66868	1.73771e-14	5.91281e-13
LOC108695252	343.539	-0.023904	0.166962	-0.143171	0.886155	0.939768
LOC108695254	7.6694	-0.63543	0.985419	-0.644832	0.519036	0.680104
LOC108695258	40.3824	0.499027	0.508141	0.982064	0.326068	0.500404
LOC108695259	413.978	1.17549	0.169099	6.95151	3.61395e-12	8.92983e-11
LOC108695260	254.772	-5.87397	0.793118	-7.40618	1.29993e-13	3.93318e-12
LOC108695261	220.358	-0.107278	0.220355	-0.48684	0.626371	0.765314
LOC108695263	46.1966	0.750102	0.48185	1.55671	0.119538	0.241708
LOC108695265	8.40759	3.99211	1.36018	2.93498	0.0033357	0.0133991
LOC108695270	393.222	-1.07304	0.167075	-6.42252	1.34035e-10	2.71609e-09
LOC108695271	28.1173	1.15804	0.67974	1.70365	0.0884464	0.191984
LOC108695273	1.61135	-4.14947	2.1836	-1.90029	0.0573951	1
LOC108695274	1.24707	-0.639344	2.39461	-0.266993	0.789475	1
LOC108695278	33.6343	-2.83532	0.562211	-5.04316	4.57898e-07	5.07784e-06
LOC108695279	2.11669	-1.63296	1.94878	-0.837941	0.402064	1
LOC108695284	1.3098	3.12415	3.0703	1.01754	0.308898	1
LOC108695285	309.83	-0.264579	0.180094	-1.46911	0.141802	0.274772
LOC108695290	3.0982	0.466926	1.53324	0.304537	0.760719	0.861901
LOC108695294	20.4141	-0.381311	0.601367	-0.634074	0.526033	0.686191
LOC108695304	0.904696	-0.614139	3.00422	-0.204425	0.838021	1
LOC108695305	0.995491	-2.788	3.05532	-0.912506	0.361502	1
LOC108695307	320.763	-0.606098	0.169502	-3.57575	0.000349222	0.00193287
LOC108695308	24.3438	-0.298649	0.464513	-0.642929	0.52027	0.681166
LOC108695309	66.0879	-1.30466	0.429398	-3.03835	0.00237881	0.0100348
LOC108695312	769.931	0.0812438	0.167886	0.483924	0.62844	0.767143
LOC108695316	72.3292	-1.6416	0.36219	-4.53241	5.83134e-06	5.07235e-05
LOC108695319	1.44233	0.982122	2.47316	0.397113	0.691284	1
LOC108695329	533.495	-0.274542	0.165008	-1.66382	0.0961488	0.204644
LOC108695330	2.66647	-0.0062257	1.76455	-0.00352821	0.997185	0.998738
LOC108695331	84.1997	0.661774	0.348777	1.89741	0.0577734	0.138207
LOC108695332	354.533	-1.09887	0.229969	-4.77834	1.76752e-06	1.72952e-05
LOC108695335	7.51776	-0.374749	0.995272	-0.376529	0.706524	0.825605
LOC108695342	1.81288	1.17636	2.03278	0.578695	0.562795	1
LOC108695343	48.9495	-0.400749	0.351368	-1.14054	0.254062	0.420024
LOC108695344	25.306	2.48012	0.706853	3.50868	0.000450332	0.00240952
LOC108695345	4199.24	-0.928362	0.169824	-5.46662	4.58705e-08	6.21447e-07
LOC108695348	3.6282	0.401838	1.615	0.248817	0.803502	0.890295
LOC108695349	340.751	0.0888868	0.197752	0.449487	0.653081	0.785601
LOC108695356	16.5991	2.15836	0.813336	2.65371	0.00796133	0.0277944
LOC108695358	6.14524	2.56941	1.15047	2.23335	0.0255256	0.0725055
LOC108695359	77.2051	-0.619759	0.297949	-2.08009	0.0375175	0.0984495
LOC108695360	247.773	-0.0990113	0.24078	-0.411211	0.680918	0.806915	X
LOC108695362	1.09507	-1.28163	2.89241	-0.4431	0.657694	1
LOC108695366	1.25477	-0.77094	2.76071	-0.279254	0.78005	1
LOC108695370	54.8893	-0.937358	0.388929	-2.4101	0.0159482	0.0495516
LOC108695373	65.4643	-0.858808	0.387237	-2.21779	0.0265695	0.0749394
LOC108695374	163.125	-0.674446	0.251976	-2.67663	0.00743665	0.0262687
LOC108695380	27.2919	2.52292	0.588235	4.28897	1.79502e-05	0.000138877
LOC108695382	561.008	0.089458	0.174722	0.512003	0.608649	0.751425
LOC108695386	6.15085	0.962098	1.13728	0.845967	0.397571	0.571807
LOC108695387	15.6285	-0.525845	0.686426	-0.766062	0.443639	0.615049
LOC108695393	1032.86	-0.937466	0.184325	-5.08595	3.658e-07	4.13679e-06
LOC108695396	90.0238	1.04248	0.299473	3.48103	0.00049949	0.00263734	X
LOC108695398	8.4895	-0.425571	1.02177	-0.416506	0.67704	0.803987
LOC108695404	46.9333	-0.530503	0.448928	-1.18171	0.237321	0.399858
LOC108695405	5.8099	2.05979	1.15386	1.78512	0.0742418	0.167648
LOC108695413	40.7088	0.743855	0.537395	1.38419	0.166301	0.309045
LOC108695414	2.78497	-2.45135	1.93208	-1.26876	0.204527	0.359829
LOC108695416	5.3431	0.131943	1.1652	0.113237	0.909843	0.952918
LOC108695417	57.9639	0.278396	0.339321	0.820452	0.411958	0.586189		X
LOC108695419	286.706	-0.312172	0.228048	-1.36889	0.171035	0.315604
LOC108695420	43.7488	-0.278642	0.382901	-0.727714	0.466789	0.635439
LOC108695421	1.50466	0.285707	1.9089	0.149671	0.881024	1
LOC108695426	3.38622	-0.00135717	1.72474	-0.000786882	0.999372	0.999923
LOC108695427	89.969	0.553599	0.293717	1.8848	0.0594562	0.141388
LOC108695434	70.4702	-3.25532	0.391673	-8.31131	9.46478e-17	4.17886e-15
LOC108695435	115.036	0.0548479	0.297152	0.184579	0.853559	0.919981
LOC108695438	123.278	0.969724	0.313938	3.08891	0.00200894	0.00873561
LOC108695440	1282.47	0.642288	0.173214	3.70807	0.000208842	0.00123402
LOC108695449	12.0888	0.240786	0.667805	0.360563	0.718426	0.833724
LOC108695450	8.92068	2.06021	0.88594	2.32545	0.0200479	0.0598349
LOC108695453	176.74	0.113581	0.209821	0.54132	0.588287	0.736241
LOC108695457	33.6961	-0.567619	0.474292	-1.19677	0.231396	0.393289
LOC108695458	102.893	-1.25705	0.268561	-4.6807	2.85891e-06	2.67531e-05
LOC108695459	260.917	-0.386631	0.179851	-2.14973	0.0315766	0.0858983
LOC108695462	4.83065	-0.556263	1.34525	-0.413502	0.679239	0.805544
LOC108695463	314.868	0.385601	0.161996	2.38031	0.0172982	0.0529935
LOC108695464	2.22812	0.631973	1.85808	0.340122	0.733765	1
LOC108695465	11.7079	1.25591	1.06446	1.17986	0.238057	0.40077		X
LOC108695467	1.47078	0.353007	2.51555	0.14033	0.888399	1
LOC108695469	1.60462	1.24587	2.12943	0.585071	0.5585	1
LOC108695470	2.22363	0.0311375	2.07808	0.0149838	0.988045	1
LOC108695472	3.80383	0.321395	1.36975	0.234638	0.81449	0.896877
LOC108695473	3.7422	2.28679	1.7617	1.29806	0.194266	0.346497
LOC108695474	86.6541	-0.304264	0.340169	-0.894449	0.371082	0.546129
LOC108695484	3.91522	0.314887	1.37124	0.229636	0.818375	0.899321
LOC108695486	1.32814	1.15262	2.88874	0.399004	0.68989	1
LOC108695487	45.6067	0.76953	0.427465	1.80022	0.0718262	0.163641
LOC108695491	0.894413	-0.317825	2.55701	-0.124296	0.901081	1
LOC108695492	317.614	0.787861	0.214972	3.66495	0.000247389	0.00142774
LOC108695493	13.0081	-0.0839852	0.818649	-0.10259	0.918288	0.956987
LOC108695494	27.6936	-0.364993	0.52278	-0.698176	0.485067	0.651669
LOC108695496	1.26993	2.69471	2.76909	0.973139	0.330484	1
LOC108695498	22.5503	0.565109	0.605469	0.933341	0.350644	0.525542
LOC108695500	5.18947	-1.36668	1.46634	-0.932031	0.351321	0.526111
LOC108695501	41.7603	-0.181715	0.466876	-0.389216	0.697117	0.818973
LOC108695502	320.049	0.394799	0.214014	1.84473	0.0650764	0.151553
LOC108695503	99.4041	-0.122832	0.295568	-0.415579	0.677718	0.804363
LOC108695504	59.6588	0.527649	0.436954	1.20756	0.227216	0.38813
LOC108695505	120.043	0.194072	0.251029	0.773105	0.43946	0.611601		X
LOC108695506	29.0364	-1.95531	0.612618	-3.19173	0.00141425	0.00646618
LOC108695507	1.84897	2.55772	2.49077	1.02688	0.304478	1
LOC108695509	62.6512	0.170629	0.433607	0.393511	0.693942	0.81658
LOC108695511	64.7209	-0.429912	0.365937	-1.17482	0.240065	0.403469
LOC108695512	89.7682	-0.287771	0.310202	-0.927689	0.353569	0.528368
LOC108695513	12.2061	-0.294268	0.74298	-0.396064	0.692058	0.815276
LOC108695514	1.51002	-2.28811	2.42944	-0.941825	0.346282	1
LOC108695515	141.07	0.749624	0.298118	2.51452	0.0119193	0.0390421
LOC108695517	90.9302	0.0523028	0.308002	0.169813	0.865157	0.926887
LOC108695518	183.064	0.0921131	0.251616	0.366085	0.714301	0.831157
LOC108695519	92.0534	0.181906	0.325539	0.558785	0.576309	0.726791
LOC108695520	123.131	1.05093	0.281917	3.72781	0.00019315	0.00115299
LOC108695521	63.1648	-0.411445	0.407722	-1.00913	0.312912	0.486136
LOC108695522	33.4132	0.272078	0.522867	0.520359	0.602814	0.7473
LOC108695525	106.12	0.118354	0.303662	0.389755	0.696717	0.818659
LOC108695526	95.2819	0.653033	0.362907	1.79945	0.0719472	0.163821
LOC108695527	467.048	-0.473091	0.184407	-2.56547	0.0103036	0.0344667
LOC108695528	48.3933	0.708769	0.336857	2.10406	0.0353728	0.0940856
LOC108695529	42.792	1.66762	0.513132	3.24988	0.00115454	0.00543909
LOC108695530	14.3192	0.661958	0.768436	0.861436	0.388998	0.564419
LOC108695532	67.44	-0.942009	0.317014	-2.97151	0.00296341	0.0121183
LOC108695533	7.89617	2.07948	0.999826	2.07984	0.0375399	0.0984916
LOC108695534	10.0863	0.246263	0.851959	0.289055	0.772539	0.869737
LOC108695535	105.595	0.0979758	0.274196	0.357321	0.720852	0.83522
LOC108695536	98.352	0.424088	0.318127	1.33308	0.182505	0.330991
LOC108695537	116.649	0.924507	0.245779	3.76154	0.000168871	0.00102451
LOC108695538	69.3725	0.478879	0.358302	1.33652	0.181378	0.329451
LOC108695539	134.292	0.606804	0.259546	2.33794	0.0193901	0.0582141
LOC108695540	16.8009	1.66247	0.676504	2.45744	0.0139931	0.0445394
LOC108695541	25.2512	0.466346	0.555946	0.838834	0.401563	0.575635
LOC108695543	15.1095	1.34039	0.677827	1.97749	0.0479866	0.119573
LOC108695544	48.934	-0.505304	0.442074	-1.14303	0.253026	0.419036
LOC108695546	7.97243	-0.21145	1.04163	-0.202999	0.839136	0.911399
LOC108695547	10.7293	1.56481	0.898889	1.74082	0.0817149	0.180341
LOC108695548	93.6324	-0.404633	0.341255	-1.18572	0.235733	0.398073
LOC108695549	48.5121	-0.510123	0.59914	-0.851425	0.394533	0.569197
LOC108695550	3.3685	-2.07775	1.5353	-1.35332	0.175953	0.322289
LOC108695551	20.9067	1.49669	0.574428	2.60553	0.00917315	0.0312474
LOC108695552	3.84459	-1.36378	1.34576	-1.01339	0.310873	0.483918
LOC108695554	20.0614	-0.312221	0.574747	-0.543232	0.58697	0.735041
LOC108695555	12.8581	0.493767	0.947225	0.521278	0.602173	0.746806
LOC108695556	29.7096	-0.0489278	0.457794	-0.106877	0.914886	0.955565
LOC108695557	44.5513	-0.671423	0.495628	-1.35469	0.175516	0.321757
LOC108695559	14.6974	4.68836	0.955003	4.90926	9.14216e-07	9.561e-06
LOC108695560	2.75493	0.858723	1.53816	0.55828	0.576653	0.727137
LOC108695561	59.4785	0.20036	0.415423	0.482302	0.629591	0.767971
LOC108695562	27.8123	-0.645528	0.571385	-1.12976	0.258578	0.425336
LOC108695563	48.1769	-1.96397	0.498208	-3.94208	8.07789e-05	0.000532692
LOC108695564	30.4466	0.146479	0.510862	0.28673	0.774319	0.87084
LOC108695565	32.8759	0.477103	0.597145	0.798972	0.424306	0.597833
LOC108695567	29.1181	-0.0314168	0.553756	-0.0567339	0.954757	0.976106
LOC108695568	177.543	-0.070418	0.220598	-0.319213	0.749565	0.854281
LOC108695569	5.21711	1.93029	1.22627	1.57411	0.115462	0.235144
LOC108695570	471.501	0.416917	0.146496	2.84593	0.00442816	0.0170422
LOC108695571	3.5047	-0.0541471	1.52314	-0.0355497	0.971641	0.985429
LOC108695573	8.01808	0.0494085	0.845668	0.0584254	0.95341	0.975342
LOC108695574	182.958	-1.40016	0.256364	-5.46162	4.7182e-08	6.36978e-07
LOC108695575	92.7296	-3.72191	0.423916	-8.77983	1.63718e-18	8.74161e-17
LOC108695576	286.61	-3.10075	0.26429	-11.7324	8.69872e-32	1.25449e-29
LOC108695577	110.776	-2.83422	0.413672	-6.85136	7.3149e-12	1.74596e-10
LOC108695578	1.04852	-1.57035	3.4424	-0.45618	0.648261	1
LOC108695579	409.195	-3.68107	0.301704	-12.2009	3.07317e-34	5.0449e-32
LOC108695580	449.328	0.453528	0.214609	2.11327	0.0345773	0.0923757
LOC108695581	1.04388	2.53617	2.82852	0.896643	0.369909	1
LOC108695582	956.865	0.229439	0.158345	1.44898	0.147343	0.282634
LOC108695583	65.7811	0.839107	0.325371	2.57893	0.00991075	0.0333768
LOC108695585	69.1143	0.757507	0.428227	1.76894	0.0769042	0.17214
LOC108695586	70.2125	-0.262684	0.309248	-0.849428	0.395643	0.570164		X
LOC108695587	1.23745	1.9698	2.75483	0.715035	0.474587	1
LOC108695588	9.13831	0.701794	0.970069	0.723447	0.469405	0.637847
LOC108695591	8.73406	0.345778	1.11883	0.309053	0.757281	0.859937	X
LOC108695592	27.0569	-1.34938	0.516945	-2.61029	0.00904642	0.0308819
LOC108695598	1.57253	0.304203	2.10046	0.144826	0.884848	1
LOC108695630	0.910251	3.92104	3.58082	1.09501	0.27351	1
LOC108695632	1.81119	0.155484	2.25375	0.0689891	0.944998	1
LOC108695636	1.81616	-1.70872	2.39627	-0.713073	0.475801	1
LOC108695638	13.2993	-0.715166	1.01823	-0.702362	0.482453	0.649118
LOC108695639	6.30166	-2.30251	1.22371	-1.88158	0.0598925	0.142207
LOC108695653	2.14111	1.97068	2.05296	0.959922	0.337095	1
LOC108695654	1.02223	1.28657	2.93912	0.437739	0.661576	1
LOC108695659	15.9212	0.285228	0.628983	0.453475	0.650207	0.783304
LOC108695660	1.65484	0.948331	2.14674	0.441753	0.658668	1
LOC108695665	12.2885	1.10819	0.7475	1.48252	0.138201	0.269603
LOC108695666	1.50482	-0.171407	2.77359	-0.0617997	0.950722	1
LOC108695667	105.921	0.6856	0.3585	1.91241	0.055823	0.134552
LOC108695668	38.8858	0.952382	0.520285	1.8305	0.067175	0.155327		X
LOC108695669	38.4564	-0.504178	0.542505	-0.929352	0.352706	0.527487
LOC108695671	1372.32	0.711639	0.114303	6.22589	4.78821e-10	8.91278e-09
LOC108695672	59.4128	-0.100576	0.426533	-0.235798	0.813589	0.896462
LOC108695673	209.135	0.0867577	0.260877	0.332562	0.739465	0.847716
LOC108695678	24.3968	0.981013	0.821142	1.19469	0.232207	0.394233
LOC108695679	1470.6	-1.56092	0.130955	-11.9195	9.37011e-33	1.41755e-30
LOC108695680	3.71444	-2.50803	1.77394	-1.41382	0.157416	0.296827
LOC108695685	1.4076	0.517337	2.89574	0.178655	0.858209	1
LOC108695689	17.653	0.278832	0.599153	0.465377	0.641661	0.776937
LOC108695690	353.926	1.00726	0.187944	5.35932	8.35343e-08	1.07823e-06
LOC108695691	85.1109	1.18989	0.349962	3.40004	0.000673753	0.00340819
LOC108695693	1.39565	0.190861	2.7487	0.0694369	0.944642	1
LOC108695694	72.0517	2.22628	0.349087	6.37742	1.80091e-10	3.58348e-09
LOC108695696	31.6135	-0.67374	0.542643	-1.24159	0.214388	0.372316
LOC108695697	2.82307	0.275581	1.77993	0.154827	0.876958	0.934137
LOC108695700	164.9	0.0034442	0.323892	0.0106338	0.991516	0.996134	X
LOC108695703	89.8278	0.863466	0.392992	2.19716	0.028009	0.0780453
LOC108695704	2.37907	1.52908	1.72714	0.885327	0.37598	1
LOC108695711	11.8484	-1.62154	0.697205	-2.32577	0.0200311	0.0598103
LOC108695735	507.235	0.165046	0.151671	1.08819	0.276512	0.445525
LOC108695739	1.05961	2.1316	2.90155	0.734643	0.462557	1
LOC108695740	508.264	0.485283	0.144123	3.36714	0.000759532	0.0037771
LOC108695745	1.04147	-1.30458	2.58072	-0.505508	0.613202	1
LOC108695753	47.2745	-0.491489	0.399216	-1.23113	0.218273	0.377449
LOC108695754	3.2644	-2.07318	1.63167	-1.27059	0.203875	0.358897
LOC108695756	95.4676	1.07159	0.285231	3.75694	0.000172007	0.00104006
LOC108695757	872.043	0.199096	0.152225	1.30791	0.190904	0.342181
LOC108695758	26.6577	1.70833	0.504886	3.38358	0.000715463	0.00359327
LOC108695759	77.473	0.0930903	0.423044	0.220049	0.825833	0.903726
LOC108695761	116.444	0.0280162	0.259715	0.107873	0.914097	0.955328
LOC108695762	44.3601	-4.59652	1.47392	-3.11856	0.00181736	0.008032
LOC108695763	2.05838	-0.225295	2.0018	-0.112546	0.910391	1
LOC108695764	8.55684	2.21513	1.02477	2.16158	0.0306504	0.0838072
LOC108695772	8.80162	6.73852	1.54575	4.35938	1.30432e-05	0.000104204
LOC108695774	1185.13	-0.462466	0.200882	-2.30218	0.021325	0.0628708
LOC108695775	1.86096	-0.423044	1.97531	-0.214165	0.830418	1
LOC108695776	1.38907	2.81924	2.81067	1.00305	0.315836	1
LOC108695777	368.463	-0.728944	0.178596	-4.08152	4.47414e-05	0.000315325
LOC108695781	121.867	0.20005	0.249591	0.801511	0.422836	0.596306
LOC108695782	4.42793	-2.44306	1.43949	-1.69717	0.089665	0.194097
LOC108695783	33.7202	-2.29399	0.579272	-3.96014	7.4907e-05	0.000497478
LOC108695785	35.2152	-2.13847	0.477167	-4.4816	7.40868e-06	6.28841e-05
LOC108695787	360.575	-0.656093	0.207869	-3.15628	0.00159793	0.0071972		X
LOC108695788	1.167	2.65216	2.58047	1.02778	0.304052	1
LOC108695789	267.454	0.144663	0.176804	0.818215	0.413235	0.587359
LOC108695795	129.635	-0.250474	0.256409	-0.976856	0.32864	0.503175
LOC108695797	134.139	0.351414	0.368092	0.954691	0.339734	0.514063
LOC108695798	2.3228	1.08317	1.90459	0.568715	0.569549	1
LOC108695799	24.2521	1.23322	0.486806	2.53329	0.0112996	0.0372773
LOC108695803	7.90529	4.14189	1.18231	3.5032	0.000459699	0.00245369
LOC108695804	119.945	0.781629	0.244243	3.20021	0.00137326	0.00630021
LOC108695805	1.84275	-0.702092	1.91766	-0.366118	0.714277	1
LOC108695807	6.5819	-0.112581	0.904431	-0.124477	0.900937	0.948093
LOC108695808	1.5201	-4.00336	2.93859	-1.36234	0.173091	1
LOC108695812	4.24856	-1.17538	1.36995	-0.857977	0.390905	0.566059
LOC108695813	583.328	1.33725	0.14859	8.99965	2.26438e-19	1.32858e-17
LOC108695814	1655.65	1.20976	0.159107	7.60347	2.88299e-14	9.54666e-13
LOC108695815	25.2401	0.325961	0.526718	0.618852	0.536014	0.694507
LOC108695816	6.84843	1.5088	1.02185	1.47654	0.1398	0.271901
LOC108695817	22.7539	-0.885359	0.621051	-1.42558	0.153989	0.291756
LOC108695821	1.73476	0	2.63323	0	1	1
LOC108695822	14.9564	-1.46465	0.784172	-1.86777	0.0617941	0.145609
LOC108695826	1.40495	3.40132	2.60934	1.30352	0.192399	1
LOC108695829	4.3175	-0.893141	1.20297	-0.742445	0.457818	0.627601
LOC108695830	3.83392	3.76325	1.97297	1.9074	0.0564685	0.135769
LOC108695831	1.96901	0.99686	2.50718	0.397602	0.690923	1
LOC108695832	0.989438	1.96348	3.05788	0.642106	0.520804	1
LOC108695833	7.15737	0.519115	1.05552	0.491811	0.622853	0.762823
LOC108695837	7.56547	1.13164	0.942721	1.2004	0.229986	0.391582
LOC108695839	1.63744	0	2.55032	0	1	1
LOC108695843	5.26684	-3.37992	1.5462	-2.18595	0.0288191	0.079847
LOC108695845	105.856	-5.78095	1.52023	-3.80269	0.000143133	0.000887022
LOC108695846	1.4427	-0.770951	2.87148	-0.268486	0.788325	1
LOC108695859	1.03137	-0.770914	3.35221	-0.229972	0.818113	1
LOC108695860	1.15396	-0.770962	3.24716	-0.237426	0.812326	1
LOC108695861	5.52774	-1.25959	1.05969	-1.18864	0.234581	0.396758
LOC108695864	1.05842	1.02087	3.2344	0.315629	0.752284	1
LOC108695879	0.972681	0.751561	3.0046	0.250137	0.802481	1
LOC108695884	1.04049	0	3.43083	0	1	1
LOC108695886	4.43974	3.87642	1.76289	2.19891	0.0278846	0.0778026
LOC108695890	9.29397	-0.0561877	1.25946	-0.0446124	0.964416	0.981679
LOC108695891	1.63002	0.59085	2.08674	0.283145	0.777066	1
LOC108695892	1.1809	2.61469	3.0809	0.848678	0.396061	1
LOC108695894	49.2017	0.385427	0.428894	0.898654	0.368837	0.543993
LOC108695895	5.34892	-0.332497	1.40005	-0.237489	0.812278	0.895787
LOC108695899	4.93431	1.83118	1.15501	1.58542	0.112871	0.231196
LOC108695901	443.855	0.362004	0.186513	1.9409	0.0522707	0.127777
LOC108695902	2.73091	1.18104	1.76284	0.669965	0.50288	0.666775
LOC108695903	1.98454	0	2.60105	0	1	1
LOC108695904	2.91363	3.10036	1.76919	1.75242	0.0797021	0.176752
LOC108695906	728.244	-8.996	0.824473	-10.9112	1.01881e-27	1.12294e-25
LOC108695907	1.40376	-0.61049	3.26901	-0.186751	0.851856	1
LOC108695912	894.605	-0.236249	0.147582	-1.6008	0.10942	0.225942
LOC108695919	3.17541	2.12933	1.71359	1.24261	0.214012	0.371929
LOC108695920	1.24514	-3.0195	3.07436	-0.982157	0.326023	1
LOC108695921	1.4621	0.782793	2.45295	0.319123	0.749633	1
LOC108695922	2.42795	0.796679	1.78404	0.446559	0.655194	0.787161
LOC108695923	1.22114	2.13812	2.46671	0.866792	0.386056	1
LOC108695931	41.4324	3.59308	0.547898	6.55793	5.45597e-11	1.16046e-09
LOC108695940	1.66055	0.832497	1.80087	0.462274	0.643885	1
LOC108695944	2.69682	1.81781	1.8821	0.965839	0.334125	0.508712
LOC108695949	4.1441	4.07577	1.97965	2.05883	0.0395105	0.10258
LOC108695950	1.31004	0	3.31598	0	1	1
LOC108695955	1.7253	1.17332	2.37127	0.494806	0.620737	1
LOC108695959	2.07507	3.63398	2.31787	1.56781	0.116926	1
LOC108695960	1455.14	0.643147	0.327588	1.96328	0.0496138	0.122625
LOC108695961	149.62	-0.875552	0.228783	-3.827	0.000129714	0.000813001
LOC108695962	446.521	0.785365	0.1848	4.2498	2.13958e-05	0.0001624
LOC108695965	706.584	0.855987	0.220431	3.88325	0.000103071	0.000663116
LOC108695967	5.24897	-5.63132	1.68364	-3.34473	0.000823626	0.00405726
LOC108695968	1.58985	-1.61422	2.49569	-0.646804	0.517759	1
LOC108695974	1.90938	-2.41034	2.26299	-1.06511	0.286826	1
LOC108695976	4.1421	1.93153	1.68805	1.14424	0.252526	0.418575
LOC108695982	3.69114	-1.8598	1.43907	-1.29236	0.196232	0.348734
LOC108695983	188.52	0.655802	0.210086	3.12159	0.0017988	0.00796593
LOC108695984	0.861752	1.15258	3.86013	0.298585	0.765256	1
LOC108695989	45.4897	1.51329	0.415987	3.63782	0.000274958	0.00156564
LOC108695990	40.7015	2.01405	0.561123	3.58933	0.000331533	0.00184456
LOC108695991	30.974	-1.30713	0.503001	-2.59865	0.00935898	0.0317648
LOC108695992	17.1613	1.14405	0.619836	1.84573	0.0649318	0.151354
LOC108695993	4.92463	0.254488	1.23558	0.205966	0.836818	0.910022
LOC108696000	4.09449	0.28512	1.73447	0.164385	0.869428	0.929514
LOC108696003	5.16354	-4.0124	1.63348	-2.45635	0.0140358	0.0446478
LOC108696004	1.34166	-1.02163	2.33379	-0.437754	0.661565	1
LOC108696005	3.35233	-1.19074	1.65954	-0.717513	0.473058	0.641342
LOC108696007	32.6712	-0.407496	0.452436	-0.90067	0.367764	0.543016
LOC108696008	2.40089	-2.08148	1.83266	-1.13577	0.256054	0.422246
LOC108696012	321.625	0.502525	0.172175	2.91869	0.00351505	0.0139972
LOC108696013	66.149	0.0358287	0.352241	0.101716	0.918982	0.957483
LOC108696014	298.172	0.123424	0.223515	0.552196	0.580814	0.730765
LOC108696016	380.835	0.70858	0.181491	3.90421	9.45326e-05	0.000613557
LOC108696019	1.94463	1.20833	2.06066	0.58638	0.55762	1
LOC108696020	57.0056	0.195181	0.361522	0.539886	0.589276	0.736988
LOC108696022	276.874	0.314127	0.224785	1.39746	0.162276	0.303671		X
LOC108696023	8.83362	0.308481	0.844616	0.365232	0.714938	0.831428
LOC108696024	5.8854	1.45134	1.08823	1.33366	0.182314	0.330742
LOC108696025	8.54351	1.53205	0.947047	1.61771	0.105725	0.220034
LOC108696027	1.00281	-1.28021	2.63636	-0.485597	0.627253	1
LOC108696028	1.16817	0	3.27108	0	1	1
LOC108696029	6.34515	-0.345013	1.15198	-0.299495	0.764562	0.864604
LOC108696035	6.98636	-1.65413	1.34628	-1.22867	0.219195	0.378472
LOC108696037	2.04371	1.15262	2.55192	0.451667	0.651509	1
LOC108696040	1.32884	-0.456421	2.43333	-0.18757	0.851214	1
LOC108696045	229.602	1.73928	0.281722	6.17374	6.66939e-10	1.21362e-08
LOC108696047	6.38778	-0.876103	0.898231	-0.975365	0.329379	0.503976
LOC108696053	9.4988	0.348575	0.950753	0.36663	0.713895	0.83083
LOC108696054	3.89942	1.97241	1.46627	1.34518	0.178566	0.325819
LOC108696056	6.74788	-1.31418	1.21652	-1.08028	0.280017	0.449349
LOC108696057	48.8684	-0.603441	0.438856	-1.37503	0.169122	0.312897
LOC108696061	53.8273	-1.73921	0.396143	-4.39037	1.13159e-05	9.17579e-05
LOC108696065	7.5689	-0.0556186	1.14872	-0.048418	0.961383	0.979993
LOC108696066	41.2707	0.57439	0.397891	1.44359	0.148855	0.284721
LOC108696067	67.783	-3.75939	0.464366	-8.09574	5.69193e-16	2.31747e-14		X
LOC108696071	239.438	0.759159	0.220667	3.44029	0.000581081	0.00300585
LOC108696073	8.53207	1.57084	0.93838	1.67399	0.0941323	0.201458
LOC108696074	985.838	1.13073	0.154286	7.32878	2.32261e-13	6.80725e-12
LOC108696075	111.408	1.03681	0.273568	3.78995	0.000150678	0.000927076
LOC108696078	2508.32	0.11806	0.138151	0.854572	0.392788	0.567537
LOC108696085	53.9707	0.764532	0.408472	1.87169	0.0612495	0.144537
LOC108696087	417.708	0.651123	0.207295	3.14105	0.00168342	0.00753225
LOC108696088	2.25574	-1.57499	2.15624	-0.730434	0.465125	1
LOC108696090	2.77866	-3.28913	1.84872	-1.77914	0.0752163	0.169282
LOC108696093	2.52773	-2.42064	1.92213	-1.25935	0.207903	0.364356
LOC108696096	621.505	0.738767	0.132768	5.56435	2.63125e-08	3.71651e-07
LOC108696099	42.675	1.34367	0.38079	3.52863	0.000417712	0.0022569
LOC108696100	2.93386	2.11995	1.43325	1.47912	0.139109	0.270897
LOC108696102	10.4495	0.0569897	1.01513	0.0561403	0.95523	0.976428
LOC108696103	230.125	0.264131	0.233094	1.13315	0.257149	0.423592
LOC108696107	135.438	-1.1932	0.31717	-3.762	0.000168558	0.00102282
LOC108696109	210.418	1.50104	0.237584	6.31792	2.65101e-10	5.12307e-09
LOC108696110	412.872	0.790011	0.204251	3.86784	0.000109802	0.00070218		X
LOC108696111	251.539	-0.220087	0.188253	-1.1691	0.242363	0.40625
LOC108696112	12.8446	1.2828	0.820107	1.56419	0.117773	0.238828
LOC108696113	1.53277	2.88312	2.24432	1.28463	0.198922	1
LOC108696115	1.30954	-2.08728	2.77664	-0.75173	0.452213	1
LOC108696118	152.131	0.320848	0.243656	1.31681	0.187903	0.338177
LOC108696120	17.3223	-0.10633	0.65665	-0.161928	0.871363	0.930777
LOC108696123	1.23467	-2.05754	2.56067	-0.803514	0.421678	1
LOC108696134	489.869	0.42631	0.146014	2.91966	0.00350417	0.0139615
LOC108696138	350.844	1.13704	0.213379	5.32873	9.89018e-08	1.25713e-06
LOC108696140	10.058	-2.00069	0.930629	-2.14982	0.0315692	0.0858894
LOC108696141	1.98002	-0.50051	1.70062	-0.29431	0.768521	1
LOC108696143	465.492	-0.177729	0.188931	-0.940708	0.346855	0.52149
LOC108696145	268.254	0.279085	0.222914	1.25199	0.210575	0.367785
LOC108696147	6.22949	2.30356	1.15697	1.99103	0.0464773	0.116711
LOC108696153	1.09599	2.3168	2.71425	0.85357	0.393343	1
LOC108696154	4.04079	2.00093	1.58684	1.26095	0.207326	0.363551
LOC108696160	769.033	-2.28814	0.141348	-16.188	6.12569e-59	3.0992e-56
LOC108696161	5.46084	-2.93298	1.37904	-2.12683	0.0334339	0.0899047
LOC108696163	117.357	0.303017	0.307221	0.986315	0.323978	0.498262
LOC108696164	24.674	-0.608593	0.669718	-0.90873	0.363493	0.538685
LOC108696165	3.07508	-0.846679	1.5012	-0.564002	0.572753	0.724223
LOC108696166	416.169	0.154305	0.446432	0.345641	0.729612	0.840717
LOC108696170	5.31696	2.09536	1.12828	1.85714	0.0632915	0.148427
LOC108696172	3.02049	2.34747	1.83721	1.27773	0.201344	0.355586		X
LOC108696173	157.225	1.21241	0.249311	4.86305	1.15589e-06	1.17889e-05
LOC108696174	26.3692	-1.88701	0.571168	-3.30378	0.000953917	0.00459422
LOC108696176	59.3989	1.36723	0.39015	3.50437	0.000457695	0.00244553
LOC108696179	2.98742	-1.58186	1.65947	-0.953231	0.340473	0.514679
LOC108696180	67.5385	-2.49497	0.397762	-6.27252	3.55261e-10	6.7223e-09		X
LOC108696181	6.6352	-0.581374	1.03246	-0.563093	0.573372	0.724657
LOC108696184	1168.63	0.813049	0.144194	5.63859	1.71447e-08	2.50293e-07
LOC108696188	1.73385	0.403743	2.58809	0.156	0.876033	1
LOC108696191	81.0827	0.0932151	0.324574	0.287192	0.773965	0.870649
LOC108696194	189.756	0.772866	0.24127	3.20332	0.00135851	0.00624928
LOC108696196	192.448	-2.05168	0.236134	-8.6886	3.66921e-18	1.85334e-16
LOC108696198	1.01748	0.378632	2.67691	0.141444	0.887519	1
LOC108696199	4.2091	0.880938	1.3052	0.674947	0.499709	0.66396
LOC108696204	158.82	0.989618	0.23469	4.2167	2.47905e-05	0.00018534
LOC108696207	10.688	-0.106415	0.939736	-0.113239	0.909841	0.952918	X
LOC108696208	22.0283	-0.0149089	0.577282	-0.025826	0.979396	0.989586
LOC108696209	7.49951	0.96253	1.05321	0.913904	0.360767	0.536081
LOC108696210	34.8247	1.60066	1.17488	1.3624	0.173071	0.318295
LOC108696211	31.3158	0.143403	0.486373	0.294843	0.768114	0.866749
LOC108696212	52.7268	0.199095	0.364994	0.545476	0.585426	0.733915
LOC108696217	2.82088	-1.24602	2.1411	-0.581952	0.560599	0.714129
LOC108696218	15.3609	0.883131	0.83333	1.05976	0.289253	0.459724
LOC108696219	4.90436	0.385943	1.1507	0.335398	0.737325	0.846543
LOC108696220	40.4322	-2.2825	0.667903	-3.41741	0.000632204	0.00322551
LOC108696228	4.66124	0.0344131	1.30971	0.0262755	0.979038	0.989505
LOC108696235	1566.98	0.104483	0.111237	0.939284	0.347585	0.522173
LOC108696237	281.898	-2.06184	0.235127	-8.76903	1.80216e-18	9.57284e-17
LOC108696238	12.1307	0.134483	0.880973	0.152653	0.878672	0.935177
LOC108696239	51.414	-1.86948	0.464197	-4.02734	5.64111e-05	0.000386966
LOC108696241	152.403	0.181222	0.242219	0.748176	0.454354	0.624628
LOC108696242	204.426	-0.0289789	0.22756	-0.127346	0.898666	0.946769
LOC108696243	22.3211	-0.492489	0.555419	-0.886699	0.375241	0.550282
LOC108696244	34.9423	-1.29956	0.534077	-2.43328	0.0149628	0.0470726
LOC108696248	1.3444	-3.04834	2.41312	-1.26324	0.206504	1
LOC108696251	650.998	1.82007	0.400547	4.54396	5.52076e-06	4.82805e-05
LOC108696253	601.923	0.0328306	0.162057	0.202587	0.839458	0.911653
LOC108696254	81.0348	2.47301	0.366489	6.74783	1.5007e-11	3.46925e-10
LOC108696255	7.05254	-0.391763	0.902412	-0.434129	0.664195	0.79408
LOC108696261	1.97448	-0.79034	1.74868	-0.451964	0.651295	1
LOC108696263	224.43	-0.0785105	0.22023	-0.356494	0.721471	0.835749	X
LOC108696264	112.714	-0.813306	0.284175	-2.86199	0.00420994	0.016315
LOC108696267	8.94448	-0.696289	0.900249	-0.77344	0.439262	0.611458
LOC108696270	19.0427	-0.948366	0.644385	-1.47174	0.141092	0.273825
LOC108696272	8.09036	-1.16291	0.958804	-1.21288	0.225176	0.385702
LOC108696273	2.79477	1.26242	1.55591	0.811374	0.417151	0.591098
LOC108696274	1.07354	-3.33971	3.34597	-0.998129	0.318217	1
LOC108696277	9.60629	0.614066	0.841156	0.730027	0.465374	0.63424
LOC108696279	159.002	-0.520973	0.2553	-2.04063	0.0412878	0.106185
LOC108696281	17.6936	1.8791	0.906897	2.07201	0.0382642	0.100043
LOC108696284	7.82088	1.83256	1.27968	1.43204	0.152133	0.289342
LOC108696285	1.69825	2.20813	2.38828	0.924571	0.355189	1
LOC108696293	10.3122	1.66131	0.859269	1.9334	0.0531866	0.129503
LOC108696296	93.4561	-0.943686	0.279464	-3.37677	0.000733431	0.00366739
LOC108696297	1.80803	-2.07917	2.10523	-0.98762	0.323339	1
LOC108696298	2.91229	1.61946	1.76745	0.916269	0.359526	0.534912
LOC108696299	5.52662	0.0423931	0.997864	0.0424838	0.966113	0.982819
LOC108696300	122.768	0.380675	0.229352	1.65979	0.0969573	0.205901
LOC108696301	3.03261	-0.14999	1.42966	-0.104913	0.916445	0.956114
LOC108696302	1.48298	3.53374	2.76298	1.27896	0.200911	1
LOC108696303	3.71621	-0.0777247	1.27252	-0.0610791	0.951296	0.974146
LOC108696305	4.14014	-0.697674	1.24675	-0.559593	0.575757	0.726363
LOC108696306	93.2532	1.34185	0.308172	4.35422	1.33544e-05	0.00010647
LOC108696308	2577.97	-0.175258	0.114119	-1.53576	0.124598	0.249068
LOC108696309	180.648	-0.0532791	0.222625	-0.239322	0.810856	0.894831
LOC108696310	3.15289	1.10959	1.69258	0.655565	0.512104	0.674311
LOC108696311	11.4006	-0.174246	0.906301	-0.19226	0.847538	0.916042
LOC108696313	30.7473	2.11347	0.651821	3.24241	0.00118525	0.00556422
LOC108696315	177.697	0.493954	0.2499	1.9766	0.0480863	0.119719
LOC108696316	2.52457	-1.03908	1.95136	-0.532487	0.594389	0.740959
LOC108696319	16.2911	1.9532	0.745838	2.6188	0.00882388	0.0302581
LOC108696320	68.2334	0.0397632	0.317056	0.125414	0.900196	0.947539
LOC108696321	36.0479	-2.31296	0.486308	-4.75617	1.97305e-06	1.90945e-05
LOC108696325	59.0949	-0.289164	0.530315	-0.545269	0.585569	0.733926
LOC108696327	6.52492	-0.236412	0.962001	-0.24575	0.805876	0.891975
LOC108696328	211.899	0.00925028	0.201644	0.0458743	0.96341	0.981085
LOC108696331	80.8553	-0.0629913	0.335024	-0.18802	0.850861	0.918349
LOC108696333	5.38389	-0.44812	1.31956	-0.339598	0.734159	0.844319
LOC108696334	146.747	0.136101	0.221748	0.613766	0.53937	0.697187
LOC108696336	1.82164	4.04157	2.28167	1.77132	0.0765076	1
LOC108696337	15.173	1.66312	0.841213	1.97705	0.0480354	0.119612
LOC108696340	16.4431	1.2655	0.769089	1.64545	0.0998762	0.210588
LOC108696349	69.5798	0.417439	0.365992	1.14057	0.254049	0.420024
LOC108696353	2.7993	-2.48979	1.79505	-1.38703	0.165433	0.307885
LOC108696354	2.78501	0.193615	1.8409	0.105174	0.916238	0.956073
LOC108696357	166.146	-0.358929	0.263488	-1.36222	0.173128	0.318367
LOC108696358	285.368	0.342449	0.191736	1.78604	0.074093	0.167398
LOC108696359	161.338	-0.683427	0.271159	-2.52039	0.0117225	0.0384832
LOC108696362	1.87956	3.19672	2.03446	1.57129	0.116116	1
LOC108696366	457.169	0.779904	0.206223	3.78185	0.000155665	0.000953768
LOC108696368	276.112	0.42546	0.198749	2.14069	0.0322992	0.0874096
LOC108696370	5.50564	-0.231902	1.09571	-0.211646	0.832383	0.907996
LOC108696372	4.69223	-1.89677	1.26221	-1.50273	0.132908	0.261395
LOC108696374	324.027	0.308989	0.194258	1.59061	0.111697	0.229293
LOC108696377	437.528	-0.131098	0.176884	-0.741155	0.4586	0.628393
LOC108696379	858.714	0.700297	0.141911	4.93477	8.02442e-07	8.48696e-06		X
LOC108696380	26.0719	-0.298704	0.5121	-0.583291	0.559697	0.713696
LOC108696382	35.371	-0.377509	0.402046	-0.93897	0.347746	0.522296
LOC108696383	1.18247	-1.17245	3.04694	-0.384796	0.700389	1
LOC108696384	19.616	-0.804933	0.595466	-1.35177	0.176449	0.32293
LOC108696387	1.42068	-1.65006	2.68461	-0.614637	0.538795	1
LOC108696388	6.41154	0.891802	0.994212	0.896994	0.369722	0.544856
LOC108696390	1.52622	3.74601	2.54803	1.47016	0.141519	1
LOC108696394	64.0573	-1.60897	0.462834	-3.47634	0.000508306	0.00267657
LOC108696396	4.02525	0.41255	1.33772	0.308398	0.757779	0.860162
LOC108696399	52.6425	2.18774	0.419066	5.22051	1.78427e-07	2.15692e-06
LOC108696402	713.728	-0.910565	0.166243	-5.47732	4.31817e-08	5.87081e-07
LOC108696403	173.313	-0.789375	0.222292	-3.55107	0.000383673	0.00209871
LOC108696405	135.301	-0.754122	0.26665	-2.82813	0.00468207	0.0178547
LOC108696406	1.15764	2.21576	3.26422	0.678803	0.497263	1
LOC108696408	3.57291	-0.105227	1.19462	-0.088084	0.92981	0.96314
LOC108696410	0.943259	-0.770946	3.40448	-0.226451	0.820851	1
LOC108696412	13.9598	2.71536	0.85367	3.18081	0.00146864	0.00667726
LOC108696416	115.743	1.09883	0.279973	3.92477	8.68116e-05	0.000567984		X
LOC108696417	51.2583	0.877676	0.399506	2.19691	0.0280272	0.0780838
LOC108696418	59.7986	-0.21397	0.354384	-0.603781	0.54599	0.702419
LOC108696419	50.2946	0.792828	0.397389	1.99509	0.0460331	0.115869
LOC108696420	1.48162	-0.364462	2.37404	-0.15352	0.877989	1
LOC108696423	4.85709	-2.442	1.24912	-1.95498	0.0505856	0.124456
LOC108696425	604.143	0.155604	0.184616	0.84285	0.399313	0.573496
LOC108696426	2.25785	-0.604832	1.92426	-0.31432	0.753278	1
LOC108696429	97.7652	-0.585897	0.315244	-1.85855	0.0630913	0.148104
LOC108696431	16.4807	-1.8776	0.728824	-2.57621	0.00998896	0.0335926
LOC108696441	16.7313	-7.01229	1.34531	-5.21241	1.864e-07	2.24616e-06
LOC108696447	413.949	-0.997911	0.213546	-4.67304	2.96777e-06	2.76643e-05
LOC108696448	131.621	0.215643	0.265112	0.813404	0.415986	0.590055
LOC108696452	6.50263	-2.1247	1.46501	-1.4503	0.146975	0.282139
LOC108696457	667.052	-0.373549	0.218974	-1.7059	0.0880261	0.191139
LOC108696459	1033.47	0.248948	0.14074	1.76885	0.0769186	0.172151
LOC108696471	364.608	0.589317	0.197839	2.97878	0.002894	0.0118785
LOC108696472	1233.59	0.830712	0.190213	4.36726	1.25812e-05	0.0001008
LOC108696474	14.4895	1.13291	0.841577	1.34617	0.178247	0.32541
LOC108696475	3.92855	1.27221	1.60825	0.791057	0.428911	0.602204
LOC108696479	2.57321	-2.13663	2.20372	-0.969555	0.332268	0.506769
LOC108696481	2.80935	-3.65864	2.10572	-1.73748	0.0823032	0.181296
LOC108696483	13.1029	0.657323	0.683348	0.961916	0.336092	0.510531
LOC108696484	408.236	-0.357361	0.185311	-1.92844	0.0538002	0.130687		X
LOC108696485	2.16185	1.05856	1.69183	0.625689	0.531519	1
LOC108696486	37.8119	0.129158	0.458583	0.281645	0.778216	0.873476
LOC108696489	6.71347	-0.569781	1.15147	-0.494828	0.620721	0.761183
LOC108696494	2.65916	0.479289	1.916	0.250151	0.802471	0.889482
LOC108696498	1.01321	0.426399	2.54895	0.167284	0.867147	1
LOC108696500	11.2742	-0.0557278	0.690913	-0.0806582	0.935714	0.966207
LOC108696501	1.15471	-2.43806	2.73871	-0.890224	0.373345	1
LOC108696502	1.47859	0.190846	2.78662	0.0684864	0.945398	1
LOC108696503	2.74234	-1.65419	1.80118	-0.918392	0.358414	0.533669
LOC108696504	13.6082	0.220704	0.762517	0.289441	0.772244	0.869587
LOC108696506	53.8825	0.604373	0.448203	1.34844	0.177518	0.324387
LOC108696514	1.7693	-1.19465	2.25884	-0.528875	0.596892	1
LOC108696515	313.274	-0.155339	0.199636	-0.778111	0.436503	0.609132
LOC108696519	36.0361	0.0100382	0.47846	0.0209802	0.983261	0.991704
LOC108696520	5.61427	-0.39144	1.08882	-0.359509	0.719214	0.834062
LOC108696525	1622.81	0.0737463	0.147533	0.499863	0.617172	0.758277
LOC108696527	1.68589	-0.362905	2.6469	-0.137106	0.890947	1
LOC108696529	227.48	-0.230097	0.213677	-1.07684	0.28155	0.451199
LOC108696531	761.012	0.309444	0.215783	1.43405	0.151558	0.288567
LOC108696532	1.63747	2.20446	2.12087	1.03941	0.298612	1
LOC108696533	2.11576	1.94999	1.84898	1.05463	0.291596	1
LOC108696537	26.4838	1.95199	0.591633	3.29932	0.000969181	0.00465981
LOC108696538	628.939	0.321961	0.152722	2.10815	0.0350179	0.0933427
LOC108696539	18.5538	-0.0437838	0.694899	-0.0630075	0.949761	0.973416
LOC108696540	302.718	-0.250125	0.236694	-1.05674	0.290628	0.461435
LOC108696548	5.07481	1.9091	1.35171	1.41236	0.157845	0.297518
LOC108696549	178.092	0.532233	0.245395	2.16889	0.0300914	0.082586
LOC108696551	2.84166	-0.255147	1.69689	-0.150362	0.880479	0.936346
LOC108696552	137.923	-0.0210501	0.237381	-0.0886763	0.929339	0.962913
LOC108696554	310.858	0.201064	0.214487	0.93742	0.348543	0.52334
LOC108696555	173.842	-0.360471	0.215976	-1.66904	0.0951104	0.203008
LOC108696556	27.6982	1.28875	0.626556	2.05687	0.0396985	0.102938
LOC108696557	272.642	-0.672646	0.211739	-3.17677	0.00148927	0.00676408
LOC108696560	228.389	-1.02638	0.256676	-3.99873	6.36824e-05	0.000431854
LOC108696561	663.584	0.0217688	0.120443	0.180739	0.856572	0.92173
LOC108696562	1.65206	-0.28476	2.33835	-0.121778	0.903075	1
LOC108696563	221.2	1.63834	0.218931	7.48336	7.24487e-14	2.26063e-12
LOC108696566	5.05313	-1.00852	1.53507	-0.656989	0.511188	0.673682
LOC108696568	15.7244	-0.00416649	0.687443	-0.00606086	0.995164	0.997929
LOC108696570	261.966	-0.081452	0.189684	-0.429409	0.667625	0.796885
LOC108696575	1.30977	0.59162	2.45848	0.240644	0.809831	1
LOC108696576	1.21482	1.90403	2.93407	0.648939	0.516378	1
LOC108696581	78.1145	-0.66654	0.357479	-1.86456	0.0622437	0.146437
LOC108696584	35.1202	2.15299	0.642289	3.35206	0.000802138	0.0039666
LOC108696586	2.53147	1.14989	1.44449	0.796053	0.426001	0.599167
LOC108696587	27.7651	-1.4045	0.53143	-2.64287	0.00822072	0.0285573
LOC108696590	40.3594	1.39237	0.528859	2.63278	0.00846901	0.0292067
LOC108696592	42.0889	0.776374	0.55077	1.40962	0.158653	0.29865
LOC108696593	69.991	0.256319	0.343188	0.746877	0.455138	0.625409
LOC108696594	149.483	-0.204904	0.213451	-0.95996	0.337075	0.511421
LOC108696606	5.64878	-0.0347467	1.1425	-0.0304129	0.975738	0.987902
LOC108696608	2.45719	1.21843	2.27365	0.535889	0.592035	0.738985
LOC108696610	536.814	-0.0981248	0.158677	-0.618394	0.536316	0.694781
LOC108696613	102.823	-2.63842	0.388045	-6.79926	1.05161e-11	2.47181e-10
LOC108696618	182.435	-0.591584	0.202938	-2.9151	0.00355578	0.0141434
LOC108696619	745.91	0.749243	0.157931	4.74412	2.09418e-06	2.01216e-05
LOC108696620	285.085	-0.0638442	0.209608	-0.304589	0.760679	0.861887
LOC108696623	200.946	-0.823494	0.230933	-3.56595	0.000362546	0.00199552
LOC108696628	7.44257	-3.75384	1.56477	-2.39898	0.0164408	0.0507854
LOC108696629	81.6729	-1.7067	0.371763	-4.59084	4.41468e-06	3.95145e-05
LOC108696632	1.11411	-2.82959	2.42506	-1.16681	0.243287	1
LOC108696634	1.11852	-2.59179	3.08633	-0.839765	0.40104	1
LOC108696636	224.17	-0.754571	0.218459	-3.45406	0.000552214	0.00287539
LOC108696639	8.41687	-0.681021	1.08575	-0.627235	0.530505	0.689977
LOC108696640	2.45322	-2.51246	2.53288	-0.991938	0.321228	0.495191
LOC108696642	1.63197	0.218456	2.73233	0.0799524	0.936275	1
LOC108696645	12.9869	0.570075	0.675629	0.843769	0.398798	0.573065
LOC108696650	8.03804	0.33174	1.27765	0.259648	0.795136	0.884816
LOC108696651	3.20185	-1.17869	1.55595	-0.757538	0.448728	0.619394
LOC108696652	4.03649	2.75201	1.33426	2.06257	0.0391533	0.101867
LOC108696656	755.462	-0.207874	0.180916	-1.14901	0.250553	0.415997
LOC108696658	1.8143	-1.46299	2.46956	-0.592408	0.553577	1
LOC108696659	27.01	0.987793	0.552006	1.78946	0.0735409	0.166455
LOC108696660	12.1982	-0.504249	0.854611	-0.590033	0.555169	0.710143
LOC108696663	6.28274	2.74513	1.20033	2.28698	0.022197	0.0648471
LOC108696666	3.13455	3.38123	1.89799	1.78148	0.0748343	0.168641
LOC108696667	55.8675	1.38523	0.595242	2.32717	0.0199561	0.0596375
LOC108696673	98.9	-0.0288285	0.276129	-0.104402	0.91685	0.956222
LOC108696676	1.90936	2.58413	2.08906	1.23698	0.216095	1
LOC108696677	30.9508	-0.368354	0.564706	-0.652292	0.514213	0.675984
LOC108696681	4.94337	0.12843	1.03812	0.123714	0.901541	0.948367
LOC108696683	77.6983	-0.193071	0.353193	-0.546645	0.584622	0.733261
LOC108696684	1.48128	0	2.81621	0	1	1		X
LOC108696685	1.32874	-3.0397	3.0386	-1.00036	0.317136	1
LOC108696688	1.6795	2.09792	2.53216	0.828507	0.407383	1
LOC108696689	359.078	0.428231	0.215545	1.98673	0.0469518	0.117587
LOC108696690	6.69355	2.37726	1.18654	2.00353	0.0451201	0.113986
LOC108696692	1.70372	2.20892	2.05592	1.07442	0.282636	1
LOC108696695	110.449	-0.163336	0.298372	-0.547423	0.584088	0.732803
LOC108696697	26.2053	-0.823671	0.508459	-1.61994	0.105246	0.219245
LOC108696698	4.17788	0.338798	1.54252	0.219639	0.826152	0.903942
LOC108696704	10.4209	-0.03768	0.792047	-0.0475729	0.962057	0.980386
LOC108696707	0.966924	3.27394	3.19923	1.02336	0.30614	1
LOC108696709	581.723	0.00597723	0.153203	0.0390151	0.968878	0.98406
LOC108696712	2.25966	0.247254	2.19902	0.112438	0.910476	1
LOC108696713	247.244	1.28805	0.201956	6.37787	1.79564e-10	3.57529e-09
LOC108696714	4.95204	0.242264	1.05894	0.22878	0.81904	0.899459
LOC108696715	7.6534	-2.7128	1.20936	-2.24318	0.0248852	0.0710198
LOC108696717	2.91539	-2.58684	1.6966	-1.52472	0.127329	0.253132
LOC108696718	2.1559	-3.19216	2.09443	-1.52412	0.12748	1
LOC108696719	7.30172	4.62611	1.25715	3.67983	0.000233387	0.0013585
LOC108696725	134.393	-0.360824	0.336114	-1.07352	0.283039	0.452836
LOC108696729	55.8913	-1.15932	0.374581	-3.09499	0.00196817	0.00858086		X
LOC108696730	69.0079	0.0524549	0.320235	0.163801	0.869888	0.929845
LOC108696736	2.08167	-3.14078	2.16089	-1.45347	0.146094	1
LOC108696737	3.25939	0.70724	1.37732	0.51349	0.607608	0.750749
LOC108696741	94.2091	-0.685249	0.384771	-1.78093	0.0749241	0.168826
LOC108696742	40.3883	-0.261205	0.425545	-0.613813	0.539339	0.697176
LOC108696743	127.201	-0.0487424	0.315719	-0.154386	0.877306	0.934369
LOC108696744	32.5113	-1.13079	0.498168	-2.26991	0.0232132	0.0672056
LOC108696748	1.02771	4.16926	3.33497	1.25016	0.21124	1
LOC108696749	0.996689	3.41573	3.38559	1.0089	0.313022	1
LOC108696750	1.33642	-2.09706	2.50109	-0.838458	0.401774	1
LOC108696752	3.044	-2.77427	1.96438	-1.41229	0.157864	0.297527
LOC108696757	3.09567	-5.15373	1.80594	-2.85376	0.00432046	0.016686
LOC108696758	309.076	0.184319	0.198533	0.928405	0.353197	0.527991
LOC108696759	1.734	-0.840318	2.18169	-0.385169	0.700112	1
LOC108696761	2.27385	-0.287931	2.0134	-0.143007	0.886284	1
LOC108696763	103.384	0.0498595	0.322726	0.154495	0.87722	0.934316
LOC108696765	308.75	0.128556	0.205493	0.625599	0.531578	0.690789
LOC108696771	267.973	1.51641	0.240697	6.30009	2.97476e-10	5.7165e-09
LOC108696772	6.41919	0.829116	1.10752	0.748622	0.454085	0.624339
LOC108696775	82.8757	1.0621	0.329191	3.2264	0.0012536	0.00583626
LOC108696776	313.593	0.636698	0.197657	3.22122	0.00127648	0.005924
LOC108696777	248.959	0.380452	0.18873	2.01585	0.0438154	0.111359
LOC108696778	454.752	0.286426	0.175904	1.62831	0.103459	0.216369
LOC108696780	3.13116	2.12572	1.63915	1.29684	0.194686	0.346986
LOC108696781	192.259	0.967605	0.238508	4.0569	4.9728e-05	0.000346279
LOC108696783	67.2838	1.44385	0.379807	3.80153	0.000143804	0.000890464	X
LOC108696784	170.734	-0.44132	0.276555	-1.59578	0.110538	0.227717
LOC108696785	6.73546	0.184201	1.11744	0.164842	0.869068	0.929365
LOC108696787	1074.75	0.0026691	0.141963	0.0188014	0.985	0.992752
LOC108696788	19.3068	-1.31703	0.729525	-1.80533	0.071023	0.162304
LOC108696794	1.91249	-4.97026	2.22113	-2.23771	0.0252398	1
LOC108696797	1.54325	-1.9196	2.33369	-0.822558	0.41076	1
LOC108696798	63.6879	0.444261	0.350719	1.26671	0.205258	0.360767	X
LOC108696800	558.951	0.847682	0.174008	4.8715	1.10756e-06	1.1339e-05	X
LOC108696802	5.22886	-1.62361	1.50738	-1.0771	0.281433	0.451067
LOC108696803	16.8093	0.200944	0.609037	0.329937	0.741448	0.849043
LOC108696804	370.962	5.42555	0.298288	18.189	6.30858e-74	5.89986e-71
LOC108696805	314.65	-0.436324	0.17177	-2.54017	0.0110799	0.0366701
LOC108696811	133.712	5.3516	0.484543	11.0446	2.32698e-28	2.74104e-26
LOC108696814	2.6521	0.680465	2.07795	0.327469	0.743313	0.850138
LOC108696815	1.92294	1.0018	2.21157	0.45298	0.650563	1
LOC108696816	2.87462	1.51228	1.88031	0.80427	0.421241	0.594628
LOC108696817	3.77647	1.19136	1.54239	0.772411	0.439871	0.611941
LOC108696818	5.48413	1.97397	1.12983	1.74713	0.0806145	0.178474
LOC108696820	1.91332	-2.90769	2.25423	-1.28989	0.19709	1
LOC108696822	1.31111	1.15261	3.14775	0.36617	0.714238	1
LOC108696824	1020.12	0.696661	0.144978	4.80529	1.54528e-06	1.52903e-05
LOC108696825	2.42204	-0.069389	2.04143	-0.0339904	0.972885	0.986178
LOC108696830	5.7403	0.813739	1.13206	0.718816	0.472254	0.640731
LOC108696831	2.02634	1.47924	2.22916	0.663588	0.506954	1
LOC108696832	11.6916	-2.16151	0.783476	-2.75888	0.00579999	0.0213374
LOC108696834	331.787	1.83005	0.259612	7.04917	1.79986e-12	4.67569e-11
LOC108696836	362.586	0.214047	0.27733	0.771815	0.440224	0.612125
LOC108696837	25.4348	1.46997	0.475537	3.09117	0.00199368	0.00868194
LOC108696839	257.821	-0.803088	0.196771	-4.08133	4.47791e-05	0.000315447
LOC108696841	87.3187	0.830062	0.33869	2.4508	0.0142537	0.0451688
LOC108696842	1.03406	-0.25872	2.83859	-0.0911438	0.927378	1
LOC108696843	58.8026	1.46076	0.371015	3.93719	8.24419e-05	0.000542615	X
LOC108696844	505.256	0.632571	0.147231	4.29646	1.73546e-05	0.000134741
LOC108696845	11.2049	1.15343	0.849298	1.3581	0.174431	0.320224
LOC108696846	45.2005	-1.18888	0.457131	-2.60073	0.00930257	0.031622
LOC108696848	758.055	0.485861	0.168828	2.87785	0.00400391	0.0156357
LOC108696849	6.81713	0.161953	1.17967	0.137286	0.890804	0.942378
LOC108696851	4.00878	2.08835	1.3382	1.56056	0.118627	0.240212
LOC108696852	264.095	0.751903	0.188999	3.97834	6.93995e-05	0.000465223
LOC108696854	1.76282	3.92872	2.54512	1.54363	0.122677	1
LOC108696856	116.039	0.0174324	0.302428	0.0576416	0.954034	0.975745
LOC108696860	1.50454	-1.61925	2.57344	-0.629217	0.529207	1
LOC108696862	162.932	0.549466	0.29991	1.8321	0.0669359	0.154914
LOC108696863	1742.37	1.12167	0.111859	10.0275	1.1535e-23	9.4178e-22
LOC108696864	41.2789	1.34895	0.477991	2.82212	0.00477069	0.0181523
LOC108696865	6.23329	-0.511052	1.1884	-0.430035	0.66717	0.796588
LOC108696873	993.584	-0.206619	0.135414	-1.52583	0.127051	0.252743
LOC108696879	6.2239	0.284124	1.20232	0.236312	0.81319	0.896428
LOC108696880	535.55	0.144733	0.170357	0.84959	0.395553	0.570154		X
LOC108696881	8.26777	-0.266887	0.867901	-0.307508	0.758457	0.860385
LOC108696882	16.9785	0.137674	0.701047	0.196383	0.84431	0.914145
LOC108696883	3.459	-1.48393	1.45229	-1.02179	0.306882	0.479763
LOC108696884	3.74849	1.61334	1.36771	1.17959	0.238163	0.400901
LOC108696885	7.94079	-0.730738	1.26727	-0.576623	0.564194	0.716942
LOC108696886	2.43757	-0.933805	2.24632	-0.415705	0.677626	0.804339
LOC108696888	7.13251	3.22677	1.27788	2.5251	0.0115665	0.0380519
LOC108696889	59.034	-6.02985	0.772669	-7.80392	6.00111e-15	2.16615e-13
LOC108696890	20.389	-5.12032	1.02064	-5.01676	5.2551e-07	5.76958e-06
LOC108696891	2.97672	3.73583	2.32123	1.60942	0.107525	0.222818
LOC108696892	181.808	0.694881	0.244949	2.83684	0.0045562	0.0174523
LOC108696893	3.30928	-0.509192	1.43064	-0.355919	0.721902	0.836026
LOC108696895	289.137	-0.560999	0.193971	-2.89219	0.00382573	0.0150445
LOC108696896	2.6263	-0.0621893	1.91159	-0.0325327	0.974047	0.986967
LOC108696897	1.37368	-0.763671	2.54322	-0.300277	0.763966	1
LOC108696898	1.51862	0.190852	2.79283	0.0683365	0.945518	1
LOC108696899	1.8662	-1.29215	1.94353	-0.664845	0.50615	1
LOC108696906	19.0092	1.06829	0.669193	1.59639	0.110402	0.227512
LOC108696907	3.72761	-0.365753	1.50594	-0.242873	0.808104	0.893288
LOC108696908	3.15618	1.99746	1.38044	1.44697	0.147904	0.283376
LOC108696910	9.33778	1.28186	0.829211	1.54588	0.122134	0.245423
LOC108696911	20.8591	0.939387	0.54315	1.72952	0.0837167	0.183669
LOC108696913	232.72	2.18139	0.282266	7.72814	1.09132e-14	3.82295e-13
LOC108696914	4.08087	3.73164	1.44346	2.5852	0.00973212	0.032847
LOC108696916	12.4412	3.11464	1.0194	3.05536	0.00224787	0.00958468
LOC108696919	2.83556	-1.4199	2.05336	-0.691501	0.489251	0.654952
LOC108696921	2.02245	4.08693	4.58982	0.890434	0.373233	1
LOC108696930	1.20979	2.11859	2.88137	0.735272	0.462174	1
LOC108696932	1.39072	0	3.37161	0	1	1
LOC108696934	0.959012	2.08654	2.99601	0.696438	0.486154	1
LOC108696936	23.7313	-0.923858	0.682534	-1.35357	0.175873	0.322201
LOC108696940	120.777	-1.33876	0.301057	-4.44686	8.71362e-06	7.27617e-05
LOC108696942	4.90021	-1.35115	1.18311	-1.14204	0.253438	0.419386
LOC108696943	2.89259	-1.64911	1.69147	-0.974955	0.329582	0.504092
LOC108696944	274.542	6.80108	0.673989	10.0908	6.06791e-24	5.03408e-22
LOC108696945	744.097	-7.03899	0.560753	-12.5527	3.83986e-36	7.22596e-34
LOC108696947	48.4665	-0.474856	0.408861	-1.16141	0.245474	0.410092
LOC108696948	11.0864	-2.11172	0.919413	-2.29681	0.0216296	0.0635243
LOC108696952	4.05676	2.06314	1.72892	1.19331	0.232748	0.394826
LOC108696958	3.50833	-1.7938	1.51731	-1.18222	0.237117	0.399733
LOC108696959	4.5133	-1.1714	1.2848	-0.911742	0.361905	0.537079
LOC108696961	89.3723	0.669543	0.31359	2.13509	0.0327536	0.0884065
LOC108696963	1.69214	-1.44239	2.36342	-0.610296	0.541666	1
LOC108696973	1.43474	1.76967	2.61099	0.677778	0.497912	1
LOC108696974	1.38522	0	3.07052	0	1	1
LOC108696986	10.0559	0.0185162	0.784716	0.0235961	0.981175	0.990547
LOC108696991	1.78657	-0.341199	2.20551	-0.154703	0.877056	1
LOC108696992	109.562	0.7492	0.244869	3.0596	0.00221632	0.00947238
LOC108696993	1.6304	0.90593	2.50818	0.36119	0.717958	1
LOC108696996	6.6717	-2.11757	1.04941	-2.01787	0.0436047	0.111015
LOC108697000	81.489	-1.04223	0.352769	-2.95441	0.00313264	0.0127176
LOC108697001	1.59803	-3.16224	2.69502	-1.17336	0.24065	1
LOC108697002	1.35025	-1.46809	2.56156	-0.573125	0.56656	1
LOC108697004	1.65221	0	2.85755	0	1	1
LOC108697006	0.971372	0.19085	3.25497	0.0586333	0.953244	1
LOC108697008	2.07127	2.21257	2.06484	1.07155	0.283924	1
LOC108697009	104.881	0.492404	0.269458	1.82739	0.0676412	0.15616
LOC108697013	2.05115	0.0956796	2.15595	0.0443793	0.964602	1
LOC108697017	1.36845	2.32619	2.74116	0.848616	0.396095	1
LOC108697022	221.533	-0.195905	0.314548	-0.622816	0.533406	0.692174
LOC108697025	72.9815	1.10659	0.38838	2.84925	0.0043823	0.016891
LOC108697026	1.35595	1.96876	2.77566	0.709293	0.478143	1
LOC108697028	1.48078	-0.757844	2.08874	-0.362824	0.716736	1
LOC108697030	1.3125	-0.996411	2.75278	-0.361965	0.717378	1
LOC108697031	3.54889	1.19512	1.40692	0.84946	0.395626	0.570164
LOC108697040	3.54058	1.09126	1.68013	0.649508	0.51601	0.677635
LOC108697046	7.86471	4.87054	2.89158	1.68439	NA	1
LOC108697047	108.517	1.61166	0.312193	5.16237	2.43838e-07	2.87067e-06
LOC108697051	4.37019	-0.592414	1.18742	-0.498907	0.617845	0.758789
LOC108697053	1.21529	-0.770944	3.29175	-0.234205	0.814826	1
LOC108697056	5.35504	1.0916	1.14545	0.952988	0.340596	0.514705
LOC108697058	2.13306	-0.820084	1.86685	-0.439286	0.660454	1
LOC108697059	1.38987	0	3.41011	0	1	1
LOC108697060	7.85795	-1.39986	0.985576	-1.42035	0.155507	0.294037
LOC108697068	2.63897	-1.33063	1.98434	-0.670564	0.502498	0.66644
LOC108697069	1.1072	-1.33155	2.75086	-0.484049	0.628351	1
LOC108697098	1.08279	-2.67259	2.86295	-0.933508	0.350558	1
LOC108697100	8.49267	-0.533829	0.771379	-0.692045	0.488909	0.654721
LOC108697106	3.10383	3.37587	2.11805	1.59386	0.110968	0.228284
LOC108697107	2.63274	-0.106636	1.68497	-0.063287	0.949538	0.973299
LOC108697109	24.0444	-1.08795	0.616805	-1.76385	0.0777577	0.173443	X
LOC108697112	42.2469	0.549859	0.379964	1.44713	0.147859	0.283325
LOC108697113	1.58995	-3.01415	2.9136	-1.03451	0.300898	1
LOC108697120	1.20422	2.92191	3.44138	0.849052	0.395852	1
LOC108697125	2.10456	-2.67032	2.36966	-1.12688	0.259793	1
LOC108697127	728.767	0.219114	0.140796	1.55626	0.119647	0.241865
LOC108697129	14.072	-1.01271	0.650636	-1.55649	0.119593	0.241787
LOC108697132	397.497	-0.3355	0.164912	-2.03442	0.0419093	0.107497
LOC108697133	60.8011	1.93492	0.479453	4.03568	5.44449e-05	0.000375565
LOC108697135	106.55	-1.11392	0.273933	-4.0664	4.7745e-05	0.000334129
LOC108697141	9.36943	1.57517	0.979687	1.60783	0.107873	0.223404
LOC108697142	182.989	0.815367	0.216188	3.77156	0.000162227	0.000988481
LOC108697143	201.471	-0.664006	0.262085	-2.53355	0.0112914	0.0372542
LOC108697144	1.07166	-1.48374	2.94726	-0.50343	0.614662	1
LOC108697147	7.83787	1.3757	1.03079	1.33461	0.182005	0.330356
LOC108697152	1.34476	-3.06433	2.78566	-1.10004	0.271315	1
LOC108697154	4.11613	1.24514	1.56972	0.793223	0.427648	0.600954
LOC108697165	2.34309	2.29544	2.03923	1.12564	0.260317	1
LOC108697172	409.984	0.199912	0.143604	1.3921	0.163891	0.305933
LOC108697173	20.2888	0.575539	0.561839	1.02438	0.305654	0.4784
LOC108697174	377.306	0.548196	0.192649	2.84557	0.00443316	0.0170546
LOC108697177	3.78078	3.11464	1.58073	1.97038	0.048795	0.121083
LOC108697179	44.2193	2.21748	0.450808	4.91889	8.70381e-07	9.14596e-06
LOC108697180	258.987	1.22694	0.199472	6.15097	7.70124e-10	1.38992e-08
LOC108697186	349.206	-0.440641	0.207491	-2.12366	0.0336984	0.090474
LOC108697189	2.23321	0.87111	1.76028	0.494869	0.620692	1
LOC108697190	4.24115	-0.69241	1.25398	-0.552169	0.580833	0.730765
LOC108697191	8.67473	0.710554	1.50511	0.472093	0.63686	0.77322
LOC108697195	1.79292	-2.6701	2.33443	-1.14379	0.252711	1
LOC108697196	45.5924	-0.316399	0.462563	-0.684012	0.493967	0.658751
LOC108697197	10.4572	-3.29678	1.16772	-2.82327	0.00475369	0.0180921
LOC108697204	1.03808	-3.28936	2.97595	-1.10532	0.269023	1
LOC108697205	1.82688	0.435931	2.21783	0.196557	0.844174	1
LOC108697207	6.77869	-0.216421	1.15376	-0.187579	0.851207	0.918529
LOC108697208	11.3388	-0.300741	0.753313	-0.399224	0.689728	0.813607
LOC108697211	469.828	1.01589	0.165057	6.15478	7.51821e-10	1.35949e-08
LOC108697212	262.467	0.689333	0.201811	3.41573	0.000636111	0.00324335	X
LOC108697213	481.368	-0.380187	0.172203	-2.20778	0.0272594	0.0764724
LOC108697214	6.13302	1.30652	1.00641	1.2982	0.194218	0.346431
LOC108697215	7.81701	-2.20517	1.31491	-1.67704	0.093534	0.20035
LOC108697216	58.7735	0.396055	0.395604	1.00114	0.316759	0.49004
LOC108697217	493.865	0.272284	0.162501	1.67558	0.0938201	0.200893
LOC108697219	6.70602	-0.225617	0.98876	-0.228182	0.819505	0.899641
LOC108697220	1.42976	4.51365	2.84455	1.58677	0.112564	1
LOC108697221	1.71345	1.11272	2.28646	0.486656	0.626502	1
LOC108697222	43.0568	-0.142834	0.437892	-0.326186	0.744283	0.850739
LOC108697223	9.85898	0.109656	0.787426	0.139259	0.889246	0.941472
LOC108697224	194.989	1.15644	0.266619	4.33742	1.44168e-05	0.000114143
LOC108697226	60.5234	0.823757	0.333455	2.47037	0.0134974	0.0432381
LOC108697227	49.4085	-0.672297	0.379792	-1.77017	0.0766988	0.171812		X
LOC108697228	5.14446	0.967273	1.43912	0.672126	0.501503	0.665637
LOC108697229	293.469	1.67347	0.170881	9.79318	1.20447e-22	9.17833e-21
LOC108697231	3.31771	1.84183	1.51506	1.21568	0.224108	0.384458
LOC108697233	3.16912	2.98737	2.00953	1.4866	0.137121	0.26799
LOC108697234	1.61354	-1.84504	2.20344	-0.837346	0.402398	1
LOC108697235	2.90913	-0.590894	1.73669	-0.340241	0.733675	0.843868
LOC108697240	6.01917	0.0779811	1.22584	0.0636142	0.949277	0.973199
LOC108697244	418.997	0.117956	0.190286	0.619885	0.535334	0.693838		X
LOC108697246	3.15592	4.38965	1.92884	2.2758	0.0228577	0.0663673
LOC108697247	4.65858	2.81963	1.61508	1.74581	0.0808434	0.178852
LOC108697248	1.60237	1.15262	2.63591	0.437275	0.661912	1
LOC108697250	295.187	0.497032	0.194191	2.5595	0.0104823	0.0350075
LOC108697253	1.1606	-2.12705	3.54925	-0.599297	0.548975	1
LOC108697259	523.516	0.53925	0.182731	2.95105	0.00316691	0.0128264
LOC108697260	18.9606	1.07448	0.625878	1.71676	0.0860237	0.187704
LOC108697261	45.1568	-0.414618	0.440639	-0.940948	0.346732	0.521356
LOC108697262	6.05241	-2.04301	1.24999	-1.63443	0.102169	0.214281
LOC108697263	526.808	-9.24077	0.869197	-10.6314	2.12934e-26	2.12672e-24
LOC108697265	33.5874	-1.95179	0.480881	-4.05877	4.93314e-05	0.000343827
LOC108697266	134.223	0.110794	0.241713	0.458369	0.646687	0.780752
LOC108697267	570.599	0.24462	0.17788	1.37519	0.169072	0.31288
LOC108697268	5.56483	0.184441	1.41199	0.130625	0.896072	0.945276
LOC108697272	778.448	0.336276	0.418876	0.802804	0.422088	0.595523
LOC108697275	7.23467	2.30587	1.09106	2.11342	0.0345648	0.0923505
LOC108697277	132.906	0.640489	0.31948	2.00479	0.0449856	0.113696
LOC108697281	60.8601	0.599234	0.438242	1.36736	0.171513	0.316241
LOC108697282	10.8066	0.000737	0.752704	0.000979137	0.999219	0.999802		X
LOC108697287	337.053	0.0317488	0.195419	0.162465	0.87094	0.930518
LOC108697288	2.6183	-0.58619	1.74469	-0.335984	0.736883	0.846296
LOC108697289	2.65644	-1.88981	1.62486	-1.16306	0.244804	0.409314
LOC108697293	101.358	7.22373	0.6832	10.5734	3.95943e-26	3.87924e-24
LOC108697295	6.2563	3.45706	1.29574	2.66803	0.00762974	0.0268249
LOC108697297	296.509	0.346023	0.220074	1.5723	0.115881	0.235826
LOC108697299	3.83691	-0.0126038	1.41706	-0.00889435	0.992903	0.996801
LOC108697300	29.8895	0.0554686	0.533423	0.103986	0.91718	0.956349
LOC108697302	2.06527	-0.368808	1.94473	-0.189645	0.849587	1
LOC108697305	4.65199	-1.48724	1.34357	-1.10693	0.268324	0.436391
LOC108697306	1478.04	0.166882	0.322513	0.517441	0.604849	0.74871
LOC108697307	85.4611	0.713995	0.292724	2.43914	0.0147222	0.0464246
LOC108697308	2.9767	-4.99688	1.86786	-2.6752	0.00746855	0.0263603
LOC108697309	119.131	-0.0535381	0.294385	-0.181864	0.855689	0.921318
LOC108697311	700.11	0.803819	0.251473	3.19644	0.00139134	0.00637179
LOC108697312	242.815	-0.102058	0.259632	-0.393086	0.694256	0.816806		X
LOC108697317	128.622	-0.725997	0.2865	-2.53402	0.0112761	0.0372221
LOC108697318	32.6247	0.907382	0.589479	1.5393	0.123732	0.247836
LOC108697319	9.28815	2.89548	1.18049	2.45277	0.0141759	0.0449591
LOC108697320	11.0914	2.59335	0.989568	2.62069	0.00877511	0.0301076
LOC108697321	24.4005	0.0492718	0.565683	0.0871015	0.930591	0.963529
LOC108697324	198.105	0.103765	0.265754	0.390457	0.696199	0.818299
LOC108697325	40.6665	0.0304681	0.597589	0.0509851	0.959337	0.978886
LOC108697326	145.284	-0.75643	0.320137	-2.36283	0.0181358	0.0550567
LOC108697332	94.302	-0.406522	0.333659	-1.21837	0.223082	0.383137
LOC108697336	308.317	1.37801	0.210298	6.55267	5.65177e-11	1.20045e-09
LOC108697341	3.57121	0.28325	1.44569	0.195927	0.844667	0.914239
LOC108697342	1.17154	-1.1643	2.41091	-0.482929	0.629146	1
LOC108697344	41.5611	-0.819118	0.44076	-1.85842	0.0631091	0.148123
LOC108697345	2.48416	-1.42731	1.6409	-0.869835	0.38439	0.559631
LOC108697348	1038.78	-0.510888	0.14562	-3.50837	0.000450859	0.00241193
LOC108697351	1.87788	-2.06558	2.1395	-0.96545	0.334319	1
LOC108697352	3.09947	0.426717	1.93732	0.220261	0.825668	0.903577
LOC108697353	4.92372	0.0624662	1.2854	0.0485965	0.961241	0.979975
LOC108697358	3.06232	1.21632	1.65526	0.734821	0.462448	0.631578
LOC108697359	36.5914	-0.341835	0.454983	-0.751315	0.452463	0.622889
LOC108697360	3.79285	0.402025	1.2619	0.318588	0.750039	0.85479
LOC108697364	129.62	0.516508	0.259111	1.99339	0.0462191	0.116262
LOC108697367	41.6082	0.709199	0.407988	1.73828	0.0821613	0.181106
LOC108697383	0.980534	-0.770932	3.65739	-0.210787	0.833053	1
LOC108697386	497.133	-1.37763	0.219673	-6.27124	3.58175e-10	6.76913e-09
LOC108697387	134.729	0.690114	0.251172	2.74757	0.00600379	0.021965
LOC108697388	138.483	0.08154	0.247517	0.329432	0.74183	0.84926
LOC108697389	5.72072	0.534263	1.01883	0.52439	0.600007	0.745108
LOC108697393	121.052	-0.0169111	0.268309	-0.0630286	0.949744	0.973416
LOC108697397	68.261	-0.0208587	0.346422	-0.0602119	0.951987	0.974501
LOC108697398	1.73687	-1.58599	2.25114	-0.70453	0.481103	1
LOC108697399	721.419	-0.580068	0.169163	-3.42906	0.000605684	0.00311025
LOC108697400	68.4868	-1.04679	0.324216	-3.22867	0.00124367	0.00580231
LOC108697401	240.629	0.435356	0.2486	1.75123	0.0799066	0.17711
LOC108697406	157.568	1.19381	0.2269	5.26142	1.42948e-07	1.76184e-06
LOC108697408	830.977	-0.0012188	0.149207	-0.00816853	0.993483	0.997004
LOC108697410	603.251	-0.217647	0.16441	-1.32381	0.185568	0.335226
LOC108697411	3.12584	1.61455	1.81695	0.888605	0.374215	0.549457
LOC108697415	2.53421	2.04338	1.80918	1.12945	0.258708	0.425376
LOC108697416	226.03	-0.190591	0.178531	-1.06755	0.285722	0.455849
LOC108697417	111.789	-0.305808	0.295516	-1.03483	0.30075	0.473052
LOC108697420	663.528	0.127262	0.228228	0.557608	0.577112	0.727596
LOC108697421	6.09359	6.12279	1.52042	4.02703	5.64854e-05	0.000387389
LOC108697426	16.788	0.853438	0.644239	1.32472	0.185263	0.334734
LOC108697429	2.71743	-2.60818	1.75238	-1.48837	0.136654	0.267266
LOC108697430	88.2163	0.936882	0.285542	3.28106	0.00103418	0.00493837
LOC108697431	31.2612	-0.328881	0.604379	-0.544163	0.586329	0.734566
LOC108697433	13.4341	0.987158	1.00712	0.980176	0.326999	0.501284
LOC108697434	130.981	-1.50412	0.282092	-5.33203	9.71217e-08	1.23909e-06
LOC108697436	21.2223	0.135352	0.568608	0.238041	0.81185	0.8956
LOC108697440	2.9441	-1.86581	1.79348	-1.04033	0.298186	0.470097
LOC108697441	20.8073	1.49411	0.599241	2.49334	0.0126549	0.0409559
LOC108697442	1.70864	0.852443	2.58739	0.32946	0.741808	1
LOC108697444	1680.36	0.163307	0.141621	1.15313	0.248858	0.413919
LOC108697447	155.875	0.793745	0.220553	3.59889	0.000319583	0.00178612
LOC108697450	2.34464	4.32059	2.27023	1.90315	0.0570207	1
LOC108697453	66.1528	-1.14881	0.325928	-3.52475	0.000423886	0.00228746
LOC108697458	0.994961	-0.169716	3.15047	-0.0538702	0.957039	1
LOC108697459	2.09464	2.65232	2.6023	1.01922	0.308098	1
LOC108697460	18.0708	3.14381	0.921789	3.41055	0.000648327	0.00329523
LOC108697462	60.3456	-1.02715	0.388251	-2.64557	0.00815536	0.0283659
LOC108697463	180.06	-1.71054	0.30139	-5.67552	1.38266e-08	2.04562e-07
LOC108697464	0.987664	-3.05345	2.77618	-1.09988	0.271386	1
LOC108697466	315.026	0.408589	0.206439	1.97923	0.0477905	0.119212
LOC108697467	118.753	-0.13977	0.292576	-0.477723	0.632847	0.77039
LOC108697468	1.70737	-3.68674	2.5439	-1.44925	0.147269	1
LOC108697469	222.678	0.159014	0.232856	0.682885	0.494679	0.659387		X
LOC108697471	266.895	0.000747083	0.288218	0.00259208	0.997932	0.999097
LOC108697472	284.55	0.366102	0.166347	2.20082	0.0277485	0.0774858
LOC108697475	79.5321	0.125714	0.295734	0.42509	0.670771	0.799279
LOC108697476	126.016	0.793931	0.319736	2.48308	0.0130251	0.041934
LOC108697479	4.43654	1.35108	1.52287	0.887189	0.374977	0.550134
LOC108697481	1.16074	4.1402	3.00909	1.3759	0.168854	1
LOC108697488	7.53948	-1.04514	0.944667	-1.10636	0.268572	0.436537
LOC108697489	1.21863	0.601805	2.94881	0.204084	0.838288	1
LOC108697491	30.711	2.23786	0.691036	3.23841	0.00120196	0.00562897
LOC108697493	52.1275	0.190669	0.439758	0.433576	0.664596	0.794347
LOC108697494	19.6422	1.1237	0.747263	1.50376	0.132644	0.261026
LOC108697495	1.10225	0	3.66846	0	1	1
LOC108697500	2.09012	1.11109	2.22523	0.499313	0.617559	1
LOC108697502	4.79803	0.262503	1.04593	0.250975	0.801834	0.889127
LOC108697503	1.78235	-0.377391	2.06676	-0.1826	0.855112	1
LOC108697504	261.083	0.41301	0.231956	1.78055	0.0749852	0.168907
LOC108697505	30.504	0.450965	0.523488	0.861463	0.388983	0.564419
LOC108697507	6.05291	-0.613544	1.1355	-0.54033	0.588969	0.736707
LOC108697508	20.7787	0.31096	0.528862	0.587979	0.556547	0.711375
LOC108697509	11.9431	-0.909179	0.927371	-0.980383	0.326897	0.501202
LOC108697512	25.7125	-0.869173	0.500604	-1.73625	0.0825198	0.181691
LOC108697521	49.4603	1.8181	0.516831	3.51778	0.000435178	0.0023394
LOC108697523	2.06229	1.64282	1.89532	0.866776	0.386065	1
LOC108697525	41.3963	-0.469383	0.488088	-0.961677	0.336212	0.510613
LOC108697528	4.32813	-0.3773	1.16325	-0.32435	0.745673	0.851777
LOC108697529	7.83545	0.0489326	1.04555	0.0468009	0.962672	0.9806
LOC108697530	5.53745	3.55428	1.70029	2.09039	0.0365825	0.0965047
LOC108697531	1.97982	2.44318	2.24051	1.09045	0.275513	1
LOC108697535	32.1392	0.945831	0.589006	1.60581	0.108316	0.224081
LOC108697536	748.686	-0.477525	0.155653	-3.06788	0.00215584	0.00925837
LOC108697537	19.2845	-0.95908	0.663026	-1.44652	0.148032	0.283549
LOC108697538	173.984	0.109127	0.238789	0.457003	0.647669	0.781589
LOC108697539	293.471	0.0245527	0.207618	0.118259	0.905862	0.950652
LOC108697541	0.948322	-2.96955	3.00739	-0.987417	0.323438	1
LOC108697542	3894.12	1.13854	0.116577	9.76645	1.56845e-22	1.18062e-20
LOC108697544	1024.23	1.62313	0.190329	8.52801	1.48882e-17	7.09074e-16
LOC108697547	498.493	-0.105425	0.138071	-0.763556	0.445132	0.616282
LOC108697548	14.0588	0.150427	0.808813	0.185984	0.852457	0.919525
LOC108697549	12.4432	-0.457496	1.13194	-0.404172	0.686086	0.810922
LOC108697552	7.7514	2.45718	1.25979	1.95048	0.0511194	0.125439
LOC108697553	5.06673	1.36192	1.18809	1.14631	0.251668	0.417467
LOC108697557	454.101	-1.96422	0.17782	-11.0461	2.28961e-28	2.71776e-26
LOC108697558	4.0491	-2.36665	1.40339	-1.68638	0.0917229	0.197416
LOC108697559	34.4318	3.38133	0.53784	6.28687	3.23923e-10	6.17856e-09
LOC108697560	149.676	1.99712	0.274361	7.27914	3.35945e-13	9.66258e-12
LOC108697562	9.57095	0.0506006	0.80524	0.0628391	0.949895	0.973462
LOC108697563	31.6272	1.0752	0.473466	2.27092	0.0231517	0.0670774
LOC108697564	45.1966	-0.362377	0.417958	-0.867017	0.385933	0.561387
LOC108697565	6.35509	-0.0499025	0.979454	-0.0509493	0.959366	0.978886
LOC108697566	2.96579	5.04624	4.07066	1.23966	0.215101	0.373113
LOC108697567	5.05821	1.17172	1.19097	0.983843	0.325193	0.499463
LOC108697571	1015.14	0.241086	0.147229	1.6375	0.101527	0.213205
LOC108697577	1.45184	-0.384674	3.19575	-0.120371	0.90419	1
LOC108697579	204.161	-0.332056	0.227616	-1.45884	0.144608	0.278773
LOC108697580	2.37748	0.0765551	1.89675	0.0403611	0.967805	1
LOC108697581	3.24708	5.38885	1.95771	2.75264	0.00591173	0.0216844
LOC108697585	42.0305	1.2104	0.445915	2.71443	0.00663895	0.0239331
LOC108697589	12.8702	-0.952308	0.89515	-1.06385	0.287395	0.457785
LOC108697591	69.5783	-0.427013	0.35015	-1.21951	0.22265	0.382617
LOC108697597	26.2256	3.4657	0.578036	5.99564	2.02689e-09	3.42011e-08
LOC108697599	91.7158	0.272799	1.04706	0.260538	0.794449	0.884533
LOC108697600	19.957	0.596497	0.560826	1.0636	0.287508	0.457847
LOC108697603	313.657	0.251541	0.205465	1.22425	0.220857	0.380404
LOC108697606	3.65632	1.05473	1.60046	0.659017	0.509885	0.672597
LOC108697608	37.907	1.97799	0.541966	3.64965	0.000262595	0.0015044
LOC108697610	105.39	0.22546	0.307336	0.733596	0.463195	0.632248
LOC108697611	2.61065	-1.79987	1.94452	-0.925608	0.35465	0.529614
LOC108697612	1.01651	2.3644	2.84134	0.832141	0.405329	1
LOC108697613	1.78778	2.01498	2.18562	0.921928	0.356566	1
LOC108697619	749.455	0.431052	0.189664	2.27271	0.0230438	0.0668213
LOC108697620	5.37383	1.61311	1.28463	1.2557	0.209223	0.366108
LOC108697621	342.102	0.563754	0.189738	2.97122	0.00296619	0.0121264
LOC108697627	5.2053	1.12107	1.2866	0.871342	0.383567	0.558723
LOC108697630	440.7	0.511018	0.188937	2.70469	0.00683678	0.0245316
LOC108697634	48.1855	-0.056456	0.439029	-0.128593	0.89768	0.946149
LOC108697635	2.05735	0.100697	1.49873	0.0671887	0.946431	1
LOC108697640	448.1	0.0179665	0.161877	0.110989	0.911625	0.953876
LOC108697641	361.305	0.849688	0.195465	4.34702	1.38002e-05	0.00010974
LOC108697646	45.1826	0.335134	0.524174	0.639357	0.522591	0.683313
LOC108697648	77.4433	0.482321	0.339353	1.4213	0.15523	0.293656
LOC108697649	93.081	0.24229	0.344231	0.703858	0.481521	0.648458
LOC108697652	1.65051	1.97329	2.55969	0.770909	0.440761	1
LOC108697654	47.2942	0.0986004	0.383133	0.257353	0.796906	0.885871
LOC108697655	151.573	-0.66696	0.255638	-2.609	0.00908076	0.0309703
LOC108697657	20.7677	2.49165	0.859777	2.89802	0.00375532	0.0148054
LOC108697658	3.72454	-1.54082	1.51741	-1.01543	0.309902	0.482796
LOC108697659	17.3076	-2.30977	0.838355	-2.75512	0.00586699	0.0215563
LOC108697661	182.95	-0.592127	0.231476	-2.55805	0.0105261	0.0351236
LOC108697662	2.19645	2.64414	1.98699	1.33072	0.18328	1
LOC108697665	11.9017	-3.8684	1.08345	-3.57044	0.000356385	0.00196652
LOC108697666	14.4049	0.734221	0.706124	1.03979	0.298437	0.470373
LOC108697669	37.4094	-0.333757	0.587619	-0.567982	0.570047	0.722029
LOC108697670	923.455	-1.9222	0.169071	-11.3692	5.95473e-30	7.78707e-28
LOC108697678	110.213	-1.02163	0.32415	-3.15174	0.00162303	0.00729428
LOC108697679	2.66635	1.0847	1.63688	0.662666	0.507544	0.67049
LOC108697683	160.095	0.756387	0.232867	3.24815	0.00116158	0.00546558	X
LOC108697686	4.74644	-4.39346	1.54982	-2.83483	0.00458503	0.0175452
LOC108697687	243.534	-0.439613	0.22977	-1.91327	0.0557133	0.134383
LOC108697692	102.242	-1.86172	0.388034	-4.79783	1.60392e-06	1.58248e-05		X
LOC108697695	46.5527	-1.57638	0.44488	-3.54338	0.000395034	0.00215246
LOC108697697	1.42279	-4.10219	2.21969	-1.84809	0.064589	1
LOC108697699	48.4693	0.655122	0.528056	1.24063	0.214742	0.372693
LOC108697700	26.0205	1.53704	0.555301	2.76794	0.00564114	0.0208674
LOC108697701	3.5925	0.928207	1.27645	0.727181	0.467115	0.635686
LOC108697702	217.025	-0.115669	0.203716	-0.567795	0.570174	0.722154
LOC108697703	31.8285	1.38254	0.528142	2.61775	0.00885121	0.0303316
LOC108697705	17.6351	0.496656	0.622941	0.797276	0.425291	0.598673
LOC108697709	3.10498	-4.20478	1.82793	-2.3003	0.0214315	0.0630917
LOC108697710	57.6217	-3.07012	0.451338	-6.80227	1.02982e-11	2.42428e-10
LOC108697712	38.1416	-0.0942193	0.408246	-0.23079	0.817478	0.898718
LOC108697713	156.902	-0.761031	0.214958	-3.54037	0.000399572	0.00217411
LOC108697714	1023.88	-0.629043	0.175888	-3.57638	0.000348385	0.00192859
LOC108697715	11.4323	2.87462	0.892577	3.22059	0.00127928	0.00593346
LOC108697718	1.46233	-2.92301	2.29076	-1.276	0.201954	1
LOC108697719	2.25842	3.85471	4.3694	0.882206	0.377666	1
LOC108697722	246.744	-0.443116	0.220073	-2.0135	0.0440623	0.111793
LOC108697723	74.9555	0.558021	0.332494	1.67829	0.0932907	0.199939
LOC108697724	209.252	-0.0986817	0.219434	-0.44971	0.652919	0.785468
LOC108697726	38.4856	0.578379	0.382811	1.51087	0.130821	0.258426
LOC108697729	402.052	0.243208	0.199235	1.22071	0.222196	0.382113	X
LOC108697731	6.09125	3.00772	1.3129	2.2909	0.0219692	0.0643337
LOC108697732	61.1522	0.626985	0.395391	1.58574	0.112799	0.231064
LOC108697733	193.121	-0.417298	0.211052	-1.97722	0.0480163	0.119584
LOC108697734	48.3976	0.156357	0.426901	0.366261	0.71417	0.831067
LOC108697737	63.808	2.27977	0.373478	6.10416	1.03341e-09	1.82769e-08
LOC108697738	23.6138	-1.50346	0.544672	-2.7603	0.00577484	0.0212753
LOC108697739	21.4154	0.266372	0.681536	0.39084	0.695916	0.818091
LOC108697749	41.7617	1.0248	0.496823	2.06271	0.03914	0.101851
LOC108697754	3.7507	-0.670424	1.37775	-0.486607	0.626537	0.765364
LOC108697757	56.6335	-0.830969	0.376992	-2.20421	0.0275098	0.0769657	X
LOC108697759	43.5361	-0.519516	0.401504	-1.29392	0.195692	0.348154
LOC108697760	9589.18	0.364748	0.0987855	3.69232	0.000222215	0.00130281
LOC108697765	430.487	0.410139	0.200142	2.04924	0.0404386	0.104428
LOC108697770	247.969	1.59996	0.184105	8.69046	3.60973e-18	1.82629e-16
LOC108697771	64.1953	0.129372	0.35137	0.368194	0.712729	0.829921
LOC108697772	1.34082	2.20831	2.39332	0.922699	0.356164	1
LOC108697773	802.548	-0.300896	0.163401	-1.84145	0.065555	0.15244
LOC108697778	82.3791	-1.24	0.301537	-4.11226	3.91798e-05	0.000279706
LOC108697779	108.077	-0.168651	0.367058	-0.459466	0.645899	0.780094		X
LOC108697781	20.9693	4.7336	0.931502	5.08168	3.74106e-07	4.21991e-06
LOC108697783	20.5881	-1.93747	0.709764	-2.72974	0.00633838	0.0230217
LOC108697787	0.968321	3.91429	3.56146	1.09907	0.271738	1
LOC108697789	67.6384	0.0179438	0.376994	0.0475971	0.962037	0.980386
LOC108697790	1.43632	-1.34078	2.27358	-0.589722	0.555377	1
LOC108697791	3.97524	-0.88928	1.25655	-0.707714	0.479123	0.646392
LOC108697792	572.914	-0.250161	0.15723	-1.59106	0.111597	0.229179
LOC108697796	13.7585	-2.22115	0.981696	-2.26257	0.0236624	0.0682877
LOC108697797	12.2349	-5.2152	1.32731	-3.92915	8.52463e-05	0.00055869
LOC108697800	2.88125	1.01694	1.66078	0.612326	0.540322	0.697892
LOC108697803	22.7082	-1.58076	0.690681	-2.2887	0.0220965	0.0646208
LOC108697807	2.29508	1.61711	1.94496	0.831433	0.405729	1
LOC108697808	431.506	0.365107	0.162454	2.24745	0.0246113	0.0704137
LOC108697814	119.628	1.98116	0.322173	6.14937	7.77921e-10	1.40235e-08
LOC108697815	818.161	-0.0204323	0.136975	-0.149168	0.881421	0.936851
LOC108697819	1.62714	1.22007	2.40432	0.50745	0.611839	1
LOC108697823	21.0698	0.576871	0.585467	0.985318	0.324468	0.498791
LOC108697824	68.7624	0.507582	0.323772	1.56772	0.116948	0.237528
LOC108697825	93.8626	1.1323	0.312292	3.62578	0.00028809	0.00163078	X
LOC108697826	3.19522	-2.32163	2.02373	-1.1472	0.251297	0.417076
LOC108697827	37.3142	1.058	0.496779	2.12971	0.0331953	0.0893888
LOC108697828	1.3783	2.81658	2.73214	1.03091	0.302585	1
LOC108697830	4.60961	-0.0236033	1.26638	-0.0186383	0.98513	0.992851
LOC108697833	44.5498	-0.811019	0.523431	-1.54943	0.121279	0.244333
LOC108697837	7.81574	0.428223	0.912891	0.469084	0.63901	0.774836
LOC108697839	268.864	0.609179	0.216466	2.81421	0.00488975	0.0185254
LOC108697840	183.312	2.03246	0.305409	6.65488	2.83534e-11	6.32713e-10
LOC108697842	2.91412	0.391118	1.64919	0.237158	0.812534	0.895907
LOC108697848	19.1382	1.17804	0.574071	2.05209	0.0401614	0.103842
LOC108697853	190.873	1.48934	0.208088	7.15727	8.22991e-13	2.24852e-11
LOC108697854	63.0503	1.59071	0.320841	4.95794	7.12449e-07	7.62664e-06
LOC108697855	160.895	-0.234735	0.327632	-0.716457	0.473709	0.641802
LOC108697856	917.183	0.564725	0.18254	3.09371	0.00197672	0.00861293
LOC108697859	19.2391	-0.815604	0.663431	-1.22937	0.218932	0.378228
LOC108697860	317.723	1.03239	0.218048	4.73468	2.194e-06	2.09827e-05
LOC108697862	21.5948	1.28971	0.634853	2.03151	0.0422035	0.108108
LOC108697863	61.4979	0.147899	0.362969	0.407469	0.683663	0.809019	X
LOC108697865	100.489	0.691834	0.32694	2.11609	0.0343373	0.0918538
LOC108697866	2.12574	0.179874	2.15792	0.0833555	0.933569	1
LOC108697867	3.35431	0.304953	1.47632	0.206563	0.836351	0.909897
LOC108697869	24.7279	0.157957	0.70098	0.225337	0.821717	0.900818
LOC108697870	1518.42	0.820465	0.20209	4.0599	4.90943e-05	0.000342252
LOC108697873	11.8471	0.547291	0.71547	0.764938	0.444308	0.615545
LOC108697874	20.3104	0.913691	0.594066	1.53803	0.124041	0.24826
LOC108697876	817.291	1.58298	0.154545	10.2428	1.27432e-24	1.11411e-22
LOC108697877	4.44264	0.420693	1.44154	0.291836	0.770412	0.868261
LOC108697881	1.30884	-1.34048	2.77447	-0.483149	0.62899	1
LOC108697882	1.4946	-3.38334	2.75899	-1.2263	0.220087	1
LOC108697883	16.5045	-1.88217	0.766658	-2.45502	0.0140875	0.044738
LOC108697885	10.3263	-0.122117	0.860922	-0.141845	0.887203	0.940276
LOC108697886	608.888	0.284594	0.176851	1.60923	0.107566	0.222858
LOC108697887	2685.17	1.30618	0.149906	8.71334	2.95059e-18	1.51516e-16
LOC108697888	244.007	-0.819593	0.190067	-4.31212	1.61699e-05	0.000126498
LOC108697889	4.87847	1.20588	1.57516	0.76556	0.443938	0.615353
LOC108697890	8.52766	-2.60054	1.13353	-2.29419	0.0217795	0.0638508
LOC108697891	2.55903	-2.84911	1.95843	-1.45479	0.145728	0.280494
LOC108697894	40.1018	3.20311	0.649543	4.93132	8.1675e-07	8.62942e-06
LOC108697895	2.23262	0.511184	1.89156	0.270245	0.786972	1
LOC108697897	54.269	1.60793	0.388474	4.1391	3.48675e-05	0.000251774
LOC108697900	4.75325	0.570089	1.3773	0.413918	0.678935	0.805307
LOC108697901	178.799	1.36756	0.238918	5.72396	1.04071e-08	1.57444e-07
LOC108697903	196.177	4.59092	0.303911	15.1061	1.47548e-51	5.69201e-49
LOC108697904	429.217	1.35497	0.157146	8.62237	6.55833e-18	3.20258e-16		X
LOC108697905	206.051	-0.67269	0.201007	-3.34661	0.000818063	0.00403501
LOC108697912	3.55142	0.560778	1.77118	0.316612	0.751538	0.855929
LOC108697919	52.7597	0.412866	0.389193	1.06083	0.288769	0.459205
LOC108697920	5.91028	-1.23911	1.15288	-1.0748	0.282465	0.45229
LOC108697921	4.06029	0.348426	1.34813	0.258451	0.796059	0.885332
LOC108697922	2.12254	1.62556	2.1565	0.753795	0.450972	1
LOC108697923	7.63976	-1.35442	0.988945	-1.36956	0.170826	0.315312
LOC108697924	1.09032	0	3.17373	0	1	1
LOC108697926	17.4774	-0.0159156	0.799151	-0.0199157	0.984111	0.992083
LOC108697928	13.9233	1.41502	0.77816	1.81842	0.0689996	0.158537
LOC108697932	18.8295	1.32104	0.646716	2.0427	0.0410826	0.105763
LOC108697934	3.90856	-5.71679	1.72995	-3.3046	0.000951126	0.00458507
LOC108697935	3.05592	0.0424583	1.30132	0.032627	0.973972	0.986923
LOC108697936	5.6971	-0.388172	1.04089	-0.372925	0.709204	0.827489
LOC108697943	1.8403	-1.56493	2.06329	-0.758464	0.448173	1
LOC108697946	7.30603	-0.603306	1.05397	-0.572413	0.567042	0.71951
LOC108697947	22.9748	0.570648	0.500041	1.1412	0.253785	0.419693
LOC108697950	1.00467	0	3.16417	0	1	1
LOC108697951	4.68644	0.751026	1.17882	0.6371	0.52406	0.684507
LOC108697952	1.1478	4.51048	2.98681	1.51013	0.131009	1
LOC108697953	6.72002	1.01318	1.10046	0.92068	0.357217	0.532273
LOC108697954	42.1093	1.22845	0.377674	3.25267	0.00114327	0.00539506
LOC108697955	60.6913	0.509053	0.386472	1.31718	0.187778	0.338012
LOC108697962	5.39768	2.04727	1.33388	1.53483	0.124826	0.249326
LOC108697964	56.3322	-1.22758	0.403624	-3.04139	0.00235486	0.00995283
LOC108697966	1.56617	-0.0992715	1.94484	-0.0510436	0.959291	1
LOC108697968	0.952349	-2.00178	3.53628	-0.56607	0.571346	1
LOC108697982	3.33429	0.33614	1.70457	0.197199	0.843672	0.913946
LOC108697988	87.9824	-1.23178	0.318759	-3.86429	0.000111414	0.000711894	X
LOC108697991	16.0603	-1.13651	0.680933	-1.66905	0.095108	0.203008
LOC108697992	3.51707	0.190854	2.14673	0.0889046	0.929158	0.962788
LOC108697994	1.29208	-3.12979	2.59359	-1.20674	0.227532	1
LOC108698000	1.75993	2.59032	2.59298	0.998974	0.317807	1
LOC108698019	361.992	-0.264078	0.180255	-1.46503	0.142913	0.276301
LOC108698020	2.0072	0.289576	1.77678	0.162978	0.870536	1
LOC108698025	83.1387	-1.59952	0.402566	-3.97331	7.08799e-05	0.000473689
LOC108698033	55.678	-0.0907243	0.510727	-0.177637	0.859008	0.92346
LOC108698034	1.76881	-1.55811	2.51046	-0.620647	0.534832	1
LOC108698037	164.122	-0.273176	0.239373	-1.14121	0.253781	0.419693
LOC108698038	2.74543	-2.97002	2.26963	-1.30859	0.190673	0.341886
LOC108698040	65.2015	1.12201	0.429039	2.61517	0.00891832	0.0305107
LOC108698044	2.38919	4.62171	2.50324	1.84629	0.0648495	1
LOC108698045	9.69859	-1.56067	1.01709	-1.53444	0.124921	0.249422
LOC108698046	1.2387	0.600191	2.63263	0.227981	0.819661	1
LOC108698048	466.557	1.20617	0.170986	7.05418	1.73622e-12	4.51799e-11
LOC108698051	760.713	-0.806058	0.168961	-4.77068	1.83606e-06	1.78865e-05
LOC108698053	166.564	-0.38714	0.281051	-1.37748	0.168365	0.312003
LOC108698062	255.791	-1.10809	0.222925	-4.97066	6.67262e-07	7.16778e-06
LOC108698063	6.14497	-1.92635	1.14796	-1.67806	0.0933361	0.20001
LOC108698064	72.7787	-0.0595796	0.316566	-0.188206	0.850715	0.918224
LOC108698068	94.4932	1.1011	0.3146	3.49999	0.00046528	0.00247833
LOC108698070	5.46335	0.124595	1.16553	0.106899	0.914869	0.955565
LOC108698071	1.28004	-1.55168	2.70734	-0.573138	0.566551	1
LOC108698072	366.96	0.152508	0.184734	0.825556	0.409056	0.583415
LOC108698074	495.897	-0.942144	0.14681	-6.41744	1.38581e-10	2.80268e-09
LOC108698076	1280.71	-0.921562	0.181008	-5.09128	3.55663e-07	4.02807e-06
LOC108698077	2.70608	1.05774	1.69284	0.624835	0.532079	0.691237
LOC108698078	1.11249	-0.536053	2.54598	-0.210549	0.833239	1
LOC108698083	2.17169	-0.396254	2.2149	-0.178904	0.858013	1
LOC108698084	210.151	0.505362	0.251214	2.01168	0.0442538	0.112177
LOC108698085	438.369	-0.0354698	0.186696	-0.189987	0.849319	0.9172
LOC108698086	458.177	0.762949	0.180804	4.21976	2.44562e-05	0.000183107
LOC108698087	66.8183	4.2347	0.551325	7.68096	1.57906e-14	5.4208e-13
LOC108698088	4.05967	2.42534	1.58879	1.52653	0.126878	0.252479
LOC108698089	101.308	0.907065	0.315215	2.87761	0.00400702	0.0156448
LOC108698090	21.1551	-0.501438	0.792455	-0.632765	0.526887	0.686829
LOC108698091	300.32	0.394236	0.188745	2.08872	0.0367328	0.0968186
LOC108698093	115.128	-3.4872	0.347574	-10.033	1.09181e-23	8.9378e-22
LOC108698095	2.48275	1.15262	2.47684	0.465359	0.641674	0.776937
LOC108698096	50.4027	2.17916	0.426968	5.1038	3.32906e-07	3.79821e-06
LOC108698097	29.5175	0.481274	0.580788	0.828658	0.407298	0.58173	X
LOC108698099	1051.28	0.670017	0.239675	2.79552	0.00518164	0.0194497
LOC108698100	26.7629	-0.143355	0.564803	-0.253814	0.799639	0.88797
LOC108698101	2.72578	2.29872	1.80734	1.27188	0.203414	0.358341
LOC108698102	3.33292	2.42669	1.59427	1.52214	0.127975	0.254155
LOC108698103	53.5609	0.249189	0.35661	0.698771	0.484695	0.65139
LOC108698104	391.694	-0.44611	0.163602	-2.7268	0.00639516	0.0232033
LOC108698105	13.0555	-0.691869	0.713026	-0.970328	0.331883	0.506331
LOC108698106	0.875777	-3.06629	2.69374	-1.13831	0.254993	1
LOC108698107	8.40758	0.485992	0.926052	0.5248	0.599722	0.744934
LOC108698109	190.129	0.774099	0.230373	3.3602	0.000778852	0.00386135
LOC108698110	1.71767	-1.91336	2.23427	-0.85637	0.391793	1
LOC108698113	4.30628	3.33302	1.99726	1.66879	0.0951585	0.203027
LOC108698116	2.15666	1.26593	2.19215	0.577482	0.563614	1
LOC108698118	4.93204	1.38167	1.36854	1.00959	0.31269	0.485914
LOC108698119	1.97172	1.5131	1.87604	0.806537	0.419933	1
LOC108698121	2.76954	2.96174	2.07603	1.42664	0.153684	0.291393
LOC108698122	4.06035	1.46867	1.46735	1.0009	0.316876	0.490098
LOC108698123	9.42489	-1.34239	0.891562	-1.50566	0.132155	0.260322
LOC108698132	708.66	-1.41303	0.166623	-8.48043	2.24357e-17	1.04911e-15
LOC108698133	107.726	0.169174	0.287982	0.587447	0.556903	0.711624
LOC108698134	14.0479	0.00497495	0.673444	0.00738732	0.994106	0.997281
LOC108698136	218.567	2.70824	0.273922	9.8869	4.74498e-23	3.69797e-21
LOC108698137	44.0355	-0.60109	0.372957	-1.61169	0.10703	0.222062
LOC108698138	3.0853	0.955169	1.27553	0.748842	0.453953	0.624243
LOC108698139	54.9832	1.02845	0.545065	1.88683	0.0591832	0.140902
LOC108698140	1.1448	0.328619	2.40794	0.136473	0.891448	1
LOC108698141	426.635	-0.791885	0.173163	-4.57306	4.80642e-06	4.26008e-05
LOC108698145	2.99019	-5.25009	2.08198	-2.52168	0.0116797	0.0383632
LOC108698149	1189.4	1.22558	0.220305	5.56312	2.64993e-08	3.73947e-07
LOC108698152	31.5355	-1.04241	0.615887	-1.69253	0.0905447	0.195453
LOC108698153	44.3389	-2.4358	0.425923	-5.71887	1.07233e-08	1.61672e-07
LOC108698154	19.9165	-2.34713	0.688362	-3.40974	0.000650254	0.00330449
LOC108698157	2.2674	-4.48948	2.09793	-2.13996	0.0323583	1
LOC108698158	3.3195	-1.80375	1.67252	-1.07846	0.280828	0.450346
LOC108698160	4.37484	0.268226	1.42798	0.187836	0.851005	0.91845
LOC108698162	10.8117	-0.0509726	0.846395	-0.0602232	0.951978	0.974501
LOC108698163	1141.55	-0.0996904	0.12568	-0.79321	0.427655	0.600954
LOC108698165	61.3435	1.4173	0.406558	3.4861	0.000490118	0.00259185
LOC108698169	7.58578	3.06963	1.16517	2.6345	0.0084262	0.0290948
LOC108698170	1.67506	-1.50536	2.61269	-0.576174	0.564498	1
LOC108698172	85.4804	0.19027	0.308187	0.617383	0.536982	0.695272
LOC108698178	6.02527	3.66774	1.4859	2.46836	0.0135735	0.043446
LOC108698179	537.817	0.245209	0.164549	1.49019	0.136175	0.266554
LOC108698182	6.40761	3.16589	1.32872	2.38266	0.017188	0.0527135
LOC108698183	6.09352	-0.55328	0.950727	-0.581955	0.560597	0.714129
LOC108698184	11.765	1.32455	0.767584	1.72561	0.0844168	0.184889
LOC108698186	8.64174	-0.974842	0.904668	-1.07757	0.281226	0.450867
LOC108698187	194.108	0.322569	0.24118	1.33746	0.181071	0.329048
LOC108698189	69.6392	0.0656164	0.321105	0.204346	0.838083	0.910673		X
LOC108698191	781.562	-1.60938	0.217298	-7.40631	1.29863e-13	3.93312e-12
LOC108698194	185.896	-0.623878	0.325045	-1.91936	0.054939	0.132868
LOC108698195	1.06857	1.96549	2.97674	0.660284	0.509072	1
LOC108698196	117.871	0.664003	0.336824	1.97137	0.0486818	0.120861
LOC108698198	2.59451	0.0916045	1.89145	0.0484308	0.961373	0.979993
LOC108698199	17.7512	-1.78788	0.735872	-2.42961	0.0151152	0.0474552
LOC108698200	13.9728	-3.35028	0.888821	-3.76935	0.000163671	0.000996101
LOC108698202	33.5948	-0.935368	0.409165	-2.28604	0.0222517	0.0649637
LOC108698211	26.8374	-2.16093	0.569186	-3.79652	0.00014674	0.000906281
LOC108698213	5.35293	0.366069	1.37691	0.265864	0.790344	0.881677
LOC108698214	61.1411	-1.70652	0.420909	-4.05436	5.02717e-05	0.000349465
LOC108698216	9.30677	-6.16235	1.47546	-4.17657	2.95937e-05	0.000217147
LOC108698217	4.82819	-2.44819	1.43146	-1.71028	0.0872139	0.189669		X
LOC108698218	1.28838	0.30943	2.31326	0.133764	0.893589	1
LOC108698220	181.064	-0.206477	0.235946	-0.875103	0.381518	0.556999
LOC108698222	2.25129	0.176016	1.64682	0.106883	0.914882	1
LOC108698223	1.15336	3.75001	2.81451	1.33239	0.182734	1
LOC108698226	18.5693	0.879841	0.584441	1.50544	0.132211	0.260372
LOC108698227	71.9056	2.35351	0.353214	6.66312	2.6807e-11	5.99941e-10
LOC108698228	137.906	-0.4673	0.25712	-1.81744	0.0691499	0.158799
LOC108698229	204.119	0.317983	0.208152	1.52765	0.126599	0.252006
LOC108698230	658.668	0.0362626	0.154849	0.234181	0.814845	0.896982
LOC108698231	1.59529	0.735062	2.20102	0.333965	0.738406	1
LOC108698232	113.683	-0.295162	0.255066	-1.1572	0.247192	0.411901		X
LOC108698234	1.35516	-0.76568	2.59483	-0.295079	0.767933	1
LOC108698236	4.88184	2.66058	1.21997	2.18086	0.0291934	0.0806452
LOC108698238	288.238	0.0598005	0.227156	0.263257	0.792352	0.883024
LOC108698239	799.497	0.38723	0.181651	2.13172	0.0330299	0.0890123
LOC108698242	692.395	0.0859354	0.152163	0.564759	0.572238	0.723846
LOC108698243	108.099	-1.15529	0.280372	-4.12055	3.77969e-05	0.00027071
LOC108698244	12.5702	0.985543	0.902302	1.09225	0.274721	0.443468
LOC108698250	7.2781	0.447016	1.15598	0.3867	0.698979	0.820099
LOC108698252	18.8984	-0.230567	1.39317	-0.165498	0.868552	0.929125
LOC108698253	115.641	0.203413	0.299623	0.678897	0.497203	0.661665
LOC108698254	243.288	0.184332	0.247909	0.743547	0.457151	0.627023
LOC108698255	118.096	-0.0890395	0.267067	-0.333398	0.738834	0.847402
LOC108698259	0.962054	0.751356	3.08195	0.243792	0.807392	1
LOC108698260	23.6757	0.206625	0.593865	0.347933	0.72789	0.839562
LOC108698261	2.89198	-0.463465	1.55808	-0.297459	0.766116	0.865774
LOC108698262	2456.46	0.571663	0.124885	4.5775	4.70563e-06	4.17794e-05
LOC108698263	179.241	0.816473	0.232227	3.51583	0.000438374	0.00235207	X
LOC108698265	31.6721	1.2751	0.514136	2.48008	0.0131353	0.0422361
LOC108698269	215.867	-0.156256	0.21657	-0.721503	0.4706	0.639107
LOC108698272	25.2413	-0.183285	0.482222	-0.380085	0.703883	0.823949
LOC108698278	74.8671	0.857898	0.431224	1.98945	0.0466514	0.116996
LOC108698280	346.22	1.27673	0.219817	5.80814	6.31691e-09	9.85105e-08
LOC108698283	627.922	-0.22799	0.173578	-1.31347	0.189024	0.339778
LOC108698286	22.3118	0.740719	0.609598	1.2151	0.22433	0.38469
LOC108698287	101.255	-0.518712	0.266703	-1.94491	0.0517862	0.126853
LOC108698288	624.257	0.00635261	0.149756	0.0424198	0.966164	0.982819
LOC108698289	653.029	-0.409744	0.140182	-2.92294	0.00346743	0.0138365
LOC108698291	885.308	0.649312	0.121471	5.34539	9.02214e-08	1.15756e-06
LOC108698293	5.55945	1.39378	1.26594	1.10098	0.270904	0.439225
LOC108698296	35.0796	2.04286	0.47923	4.2628	2.01884e-05	0.000154145
LOC108698297	3.47619	-0.648846	1.27463	-0.509047	0.610719	0.752957
LOC108698299	1.59926	0.217392	2.14909	0.101155	0.919427	1
LOC108698300	2.28834	3.28914	2.26278	1.45358	0.146062	1
LOC108698301	6.06511	2.28681	1.12255	2.03715	0.0416349	0.106909
LOC108698303	6.29433	1.24609	1.00117	1.24463	0.213267	0.371048
LOC108698306	4.78253	-1.00634	1.64168	-0.612992	0.539882	0.697498
LOC108698307	4.38606	-0.825507	1.17101	-0.704956	0.480838	0.647831
LOC108698309	1.18285	-2.44846	3.30234	-0.741432	0.458432	1
LOC108698310	323.073	0.133022	0.196025	0.678596	0.497394	0.661794
LOC108698313	1279.41	0.544612	0.139781	3.89618	9.77199e-05	0.000631852
LOC108698315	2.90814	-1.54264	2.07248	-0.744343	0.456669	0.626611
LOC108698316	1.57639	-2.90041	2.71732	-1.06738	0.285801	1
LOC108698318	8.80991	1.88922	1.14552	1.64922	0.0991022	0.209247
LOC108698319	3.85074	1.14442	1.34542	0.850604	0.394989	0.569607
LOC108698320	7.5324	-1.42074	1.25617	-1.131	0.258054	0.424773
LOC108698321	2.38952	-1.15496	1.55799	-0.74131	0.458506	1
LOC108698322	9.57729	0.822921	0.810662	1.01512	0.310048	0.482926
LOC108698323	1340.39	0.281038	0.164209	1.71146	0.0869963	0.189356
LOC108698325	33.9818	1.92081	0.476814	4.02841	5.61545e-05	0.000385549
LOC108698326	2.21921	1.81931	1.853	0.981817	0.32619	1
LOC108698327	2.59862	-3.21746	1.92445	-1.67188	0.0945471	0.202063
LOC108698329	663.482	-0.337279	0.157159	-2.1461	0.031865	0.0864164
LOC108698330	4.15015	1.53052	1.49477	1.02391	0.305876	0.478577
LOC108698332	20.1237	1.61136	0.818758	1.96805	0.0490625	0.121591
LOC108698334	1038.29	0.27022	0.111923	2.41435	0.0157634	0.049081
LOC108698335	41.3908	0.787918	0.490839	1.60525	0.108439	0.224246
LOC108698336	20.8636	3.3833	0.847226	3.99338	6.51381e-05	0.000439985
LOC108698337	1.11764	3.29356	3.31674	0.99301	0.320705	1
LOC108698338	1.07108	2.92423	3.21274	0.910198	0.362718	1
LOC108698339	128.676	-4.05338	0.348873	-11.6185	3.31924e-31	4.67754e-29
LOC108698340	14.1554	-0.17054	0.747237	-0.228227	0.819469	0.899641
LOC108698341	7.41348	1.41671	1.11424	1.27146	0.203566	0.358485
LOC108698343	6.6193	2.22808	1.13999	1.95448	0.0506439	0.12456
LOC108698344	20.13	1.52606	0.600457	2.54149	0.011038	0.0365607
LOC108698345	3.10009	-4.74456	1.86577	-2.54296	0.0109919	0.0364451
LOC108698346	3.00442	-1.47812	1.73731	-0.850812	0.394874	0.56952
LOC108698348	0.860864	-2.91867	2.8967	-1.00758	0.313654	1
LOC108698350	18.5547	-1.73703	0.8493	-2.04525	0.0408301	0.105228
LOC108698352	1.18367	-0.150319	2.35595	-0.0638039	0.949126	1
LOC108698355	1.32725	-2.154	2.47875	-0.868986	0.384855	1
LOC108698356	3.97235	-5.03187	1.8495	-2.72067	0.00651502	0.0235634
LOC108698359	43.542	0.502673	0.391328	1.28453	0.198956	0.352279
LOC108698363	45.9139	-5.43162	0.706275	-7.69052	1.46541e-14	5.0475e-13
LOC108698364	1.123	0.174402	2.80533	0.0621682	0.950429	1
LOC108698365	1.74819	-2.43226	2.09115	-1.16312	0.244781	1
LOC108698366	47.5722	-5.36081	0.737539	-7.26851	3.63481e-13	1.03868e-11
LOC108698367	307.094	3.71208	0.275126	13.4923	1.73619e-41	4.46519e-39
LOC108698369	216.535	0.0398866	0.213474	0.186845	0.851782	0.919022
LOC108698370	1055.53	-0.48452	0.15207	-3.18617	0.00144168	0.00656921
LOC108698373	77.6643	0.206963	0.337094	0.613962	0.53924	0.697166
LOC108698374	9.11628	-0.0825506	1.37754	-0.0599261	0.952214	0.974612
LOC108698375	36.2026	0.671838	0.425833	1.57771	0.114633	0.233827
LOC108698376	16.3369	-0.611154	0.748799	-0.816178	0.414398	0.588576
LOC108698377	402.046	0.84271	0.183737	4.58651	4.5071e-06	4.02134e-05
LOC108698386	2221.78	0.0422931	0.136141	0.310655	0.756063	0.859211
LOC108698387	1.96061	2.93601	2.52075	1.16473	0.244127	1
LOC108698393	164.328	0.564373	0.27049	2.08648	0.0369352	0.0972323
LOC108698396	18.7376	-6.91975	1.30818	-5.2896	1.22586e-07	1.53479e-06
LOC108698399	132.329	1.00592	0.266347	3.77672	0.000158905	0.000970156
LOC108698402	35.5999	1.08347	0.516462	2.09786	0.0359176	0.0951668
LOC108698411	1627.89	-0.449282	0.158594	-2.83291	0.00461265	0.0176314
LOC108698412	316.066	-0.194854	0.213839	-0.911219	0.36218	0.537385
LOC108698413	2.6163	0.569279	1.89113	0.301026	0.763395	0.863764
LOC108698414	3.38802	4.56788	1.83598	2.48798	0.0128471	0.041465
LOC108698415	3.95856	-3.66969	1.7742	-2.06836	0.0386063	0.10075
LOC108698416	3.1671	-0.242542	1.75026	-0.138575	0.889786	0.941625
LOC108698420	2.03591	-0.0538734	2.13563	-0.025226	0.979875	1
LOC108698422	765.437	0.72743	0.151017	4.81686	1.45834e-06	1.45138e-05		X
LOC108698424	2.30054	-2.61623	4.07442	-0.642111	0.520801	1
LOC108698428	388.783	0.740282	0.195681	3.7831	0.000154886	0.000949562
LOC108698429	2.12234	0.890339	2.126	0.418785	0.675373	1
LOC108698430	25.2179	-0.12058	0.593287	-0.20324	0.838948	0.911291
LOC108698434	148.945	0.257528	0.23578	1.09224	0.274728	0.443468
LOC108698435	2.05624	-0.986537	1.83343	-0.538084	0.590519	1
LOC108698436	6.87327	-2.39436	1.4474	-1.65425	0.0980769	0.20746
LOC108698439	42.0679	-1.15852	0.429651	-2.69641	0.00700908	0.0250277
LOC108698443	7.13166	1.16339	1.29694	0.897021	0.369708	0.544856
LOC108698445	4882.57	-0.264987	0.12585	-2.10558	0.0352409	0.0938238
LOC108698446	135.56	0.100376	0.348178	0.288288	0.773127	0.870189
LOC108698449	100.833	-0.187473	0.264366	-0.709141	0.478237	0.645443
LOC108698451	325.871	-0.782604	0.216507	-3.61469	0.00030071	0.00169507
LOC108698454	2.96361	3.27891	2.07864	1.57743	0.114697	0.233927
LOC108698462	87.6608	0.329444	0.339883	0.969286	0.332403	0.506888
LOC108698465	4.64928	0.0165808	1.17992	0.0140525	0.988788	0.994751
LOC108698472	1.13195	1.98353	3.15889	0.62792	0.530056	1
LOC108698474	488.475	-0.7827	0.200025	-3.91301	9.11524e-05	0.000593579
LOC108698479	23.1744	-0.259068	0.560485	-0.46222	0.643923	0.77857
LOC108698480	159.166	-0.0399469	0.220398	-0.181249	0.856172	0.921561
LOC108698483	611.225	0.600413	0.150423	3.99151	6.56546e-05	0.000443183
LOC108698486	17.1082	-0.270646	0.797453	-0.339388	0.734318	0.844419
LOC108698487	11.9855	-0.306941	0.837831	-0.366352	0.714102	0.831019
LOC108698488	53.0756	-1.96784	0.363728	-5.41019	6.29575e-08	8.2963e-07
LOC108698490	2.75429	-1.34315	1.84175	-0.729277	0.465832	0.634529
LOC108698491	237.985	-0.907411	0.237562	-3.81968	0.000133622	0.000834789
LOC108698494	2.33787	0.014772	1.80591	0.00817981	0.993474	1
LOC108698496	54.032	-0.501911	0.430045	-1.16711	0.243164	0.407214
LOC108698497	91.4836	0.529801	0.328699	1.61181	0.107002	0.222019
LOC108698499	883.323	0.107543	0.145972	0.73674	0.46128	0.630834
LOC108698502	1079.92	0.249042	0.151463	1.64425	0.100125	0.210941
LOC108698509	2.67222	-0.211431	1.8516	-0.114188	0.909088	0.952449
LOC108698511	19.9043	-2.66834	0.676524	-3.94419	8.00705e-05	0.000528925
LOC108698512	7.09788	-1.11195	1.11296	-0.999084	0.317754	0.491116
LOC108698515	17.6218	0.231501	0.593728	0.389912	0.696602	0.818634
LOC108698516	47.241	-0.560839	0.414087	-1.3544	0.175609	0.321813
LOC108698518	269.907	0.685329	0.162993	4.20467	2.61467e-05	0.000194443
LOC108698519	613.308	0.427463	0.176266	2.4251	0.0153043	0.0479075
LOC108698520	2.39553	-3.76326	1.82506	-2.06199	0.0392084	1
LOC108698522	2.59949	0.654224	1.65186	0.396054	0.692065	0.815276
LOC108698523	68.7688	0.598879	0.367745	1.62852	0.103415	0.21632
LOC108698525	1040.34	-0.0217066	0.124132	-0.174867	0.861184	0.924833
LOC108698528	26.5429	0.971168	0.542577	1.78992	0.0734672	0.166362
LOC108698529	231.163	0.150987	0.227992	0.662248	0.507812	0.670751
LOC108698532	38.5747	-0.137546	0.384613	-0.35762	0.720627	0.835027
LOC108698533	86.7399	-0.878763	0.351512	-2.49995	0.012421	0.0403599
LOC108698534	68.4434	0.237113	0.348889	0.679624	0.496743	0.661167
LOC108698535	48.8702	0.0708596	0.382641	0.185186	0.853083	0.919741
LOC108698538	16.0229	-0.33689	0.771337	-0.436762	0.662284	0.792637
LOC108698539	8.47997	2.65326	1.29268	2.05253	0.0401178	0.103764
LOC108698540	71.5828	0.544787	0.33313	1.63536	0.101974	0.213975		X
LOC108698541	9.64136	-0.448554	0.934626	-0.479929	0.631278	0.769269
LOC108698543	1288.65	0.737913	0.135083	5.46265	4.69067e-08	6.33816e-07
LOC108698544	460.262	-0.344103	0.215855	-1.59415	0.110904	0.228211
LOC108698547	17.4561	0.174932	0.698496	0.250441	0.802246	0.889373
LOC108698548	104.659	2.37984	0.337561	7.0501	1.78788e-12	4.64848e-11
LOC108698550	7.58496	2.06723	1.02373	2.01932	0.0434544	0.110669
LOC108698551	15.0067	4.50629	2.56849	1.75445	0.079353	0.176165
LOC108698553	22.8174	-0.783355	0.65697	-1.19238	0.233114	0.395155
LOC108698556	300.251	-0.592317	0.254713	-2.32543	0.020049	0.0598349
LOC108698561	3.27901	-4.35526	1.84959	-2.35472	0.0185367	0.0560038
LOC108698563	112.786	0.559004	0.286627	1.95029	0.0511419	0.125474
LOC108698564	54.981	-1.26903	0.370636	-3.42391	0.00061726	0.00315971
LOC108698565	1.33765	1.08808	2.23082	0.48775	0.625727	1
LOC108698570	211.79	1.17915	0.242725	4.85796	1.186e-06	1.2068e-05
LOC108698571	67.7494	-4.33084	0.521973	-8.29706	1.06717e-16	4.6983e-15
LOC108698574	9.77664	-0.641989	1.14663	-0.55989	0.575554	0.726145
LOC108698575	99.8183	-1.99229	0.995934	-2.00042	0.0454546	0.114675
LOC108698577	17.6174	-1.6156	0.653623	-2.47177	0.0134447	0.0430873
LOC108698579	41.5737	-2.03706	0.547103	-3.72335	0.000196593	0.00117174
LOC108698584	213.903	-0.367639	0.204702	-1.79597	0.0724991	0.164646
LOC108698587	202.183	0.0146809	0.195639	0.0750408	0.940182	0.968488		X
LOC108698589	1.88731	1.99612	2.4508	0.814477	0.415372	1
LOC108698590	15.1354	0.367417	0.779971	0.471065	0.637595	0.773758
LOC108698591	36.5403	-0.159756	0.578671	-0.276074	0.782491	0.876515
LOC108698592	1.25503	-2.48226	2.6465	-0.937942	0.348274	1
LOC108698593	48.8439	1.1104	0.416146	2.6683	0.00762357	0.0268124
LOC108698597	34.2294	0.29929	0.432284	0.692345	0.48872	0.654554
LOC108698598	319.972	1.49573	0.20532	7.28488	3.21956e-13	9.28617e-12
LOC108698599	1.63119	-1.72175	2.45574	-0.701111	0.483234	1
LOC108698600	55.6245	0.268016	0.381159	0.703161	0.481955	0.648731
LOC108698601	1.17383	-2.75988	2.33994	-1.17947	0.238212	1
LOC108698602	18.4204	-3.27306	0.851111	-3.84564	0.00012024	0.000761822
LOC108698603	63.5029	0.09398	0.430944	0.218079	0.827367	0.904732
LOC108698604	1163.27	0.680468	0.215709	3.15457	0.00160735	0.00723438
LOC108698608	163.744	-2.05479	0.283352	-7.25172	4.11511e-13	1.16514e-11
LOC108698609	293.812	0.148337	0.194001	0.76462	0.444498	0.615713
LOC108698611	2.27219	1.00758	2.16327	0.465769	0.641381	1
LOC108698613	2.14156	-2.90021	1.96744	-1.47411	0.140453	1
LOC108698614	849.124	-0.0447441	0.142138	-0.314794	0.752918	0.857027
LOC108698616	143.878	-0.156607	0.244931	-0.639393	0.522567	0.683313		X
LOC108698617	44.8135	0.305409	0.524891	0.581852	0.560667	0.714156
LOC108698627	1.28895	2.59652	2.80875	0.92444	0.355257	1
LOC108698628	295.143	-0.427156	0.224143	-1.90573	0.0566856	0.136227
LOC108698629	201.768	-0.337581	0.21992	-1.53502	0.12478	0.249285
LOC108698631	69.2189	-0.0287716	0.3208	-0.089687	0.928536	0.96268
LOC108698632	205.145	-0.167747	0.271328	-0.618244	0.536415	0.694822
LOC108698633	2.05906	-2.1185	2.05899	-1.0289	0.303527	1
LOC108698634	365.931	-0.148135	0.185459	-0.798752	0.424434	0.597877
LOC108698636	9.65325	-1.43087	0.885832	-1.61528	0.10625	0.220843		X
LOC108698639	1.12941	-1.58131	3.05671	-0.517325	0.60493	1
LOC108698641	2.9514	2.84814	2.05287	1.38739	0.165322	0.307812
LOC108698646	6.58018	0.282287	1.11634	0.252868	0.800371	0.888207
LOC108698650	57.2969	1.8998	0.367029	5.17616	2.26503e-07	2.6886e-06
LOC108698651	3.42469	2.62516	1.527	1.71917	0.0855843	0.186995
LOC108698652	84.4553	-0.0643401	0.326894	-0.196823	0.843966	0.914053
LOC108698657	312.249	0.640104	0.193305	3.31137	0.000928389	0.0044909	X
LOC108698658	605.273	0.183256	0.167113	1.0966	0.272816	0.441559
LOC108698659	44.4467	-3.62625	0.523372	-6.92863	4.24935e-12	1.04e-10
LOC108698662	1.33355	-1.51812	2.81176	-0.539916	0.589255	1
LOC108698663	535.629	0.599324	0.165102	3.63003	0.000283385	0.00160828
LOC108698666	45.8277	2.50912	0.438988	5.71568	1.09269e-08	1.645e-07
LOC108698669	141.574	0.0891907	0.333452	0.267477	0.789102	0.880823
LOC108698670	29.5542	0.840337	0.468549	1.79349	0.0728949	0.165308
LOC108698671	23.1176	0.924862	0.529623	1.74627	0.0807649	0.178717
LOC108698673	640.971	-0.360946	0.148984	-2.42272	0.0154049	0.0481639
LOC108698674	331.865	0.497735	0.197232	2.5236	0.011616	0.0381864
LOC108698675	2.66704	1.71086	2.09124	0.81811	0.413294	0.587359
LOC108698678	5.73323	-0.313666	1.33943	-0.234178	0.814847	0.896982
LOC108698681	2.5724	0.33669	1.94127	0.173438	0.862307	0.925428
LOC108698682	49.4169	0.457871	0.434674	1.05337	0.292173	0.463325
LOC108698685	13.7406	0.779925	1.05383	0.740085	0.459249	0.62892
LOC108698691	492.737	-0.976538	0.136531	-7.15248	8.52266e-13	2.3215e-11
LOC108698694	2.1153	-3.68638	2.13151	-1.72947	0.0837247	1
LOC108698695	1.1599	0	3.59058	0	1	1
LOC108698698	1.45055	0.961299	2.14211	0.448764	0.653602	1
LOC108698702	220.163	-0.614458	0.253326	-2.42556	0.0152848	0.0478619
LOC108698705	59.8107	-0.0463561	0.376191	-0.123225	0.901929	0.94849
LOC108698707	45.2115	-0.667348	0.479516	-1.39171	0.164009	0.306099
LOC108698708	4.42117	0.171407	1.64157	0.104416	0.916839	0.956222
LOC108698711	2.58667	-0.700303	1.51956	-0.46086	0.644899	0.779283
LOC108698712	251.195	0.137604	0.253004	0.543882	0.586523	0.734689
LOC108698714	39.0565	1.02065	0.472447	2.16035	0.0307456	0.0839931
LOC108698715	23.0326	0.597607	0.88897	0.672247	0.501427	0.665593
LOC108698716	270.872	-2.36895	0.207285	-11.4285	3.01285e-30	4.00787e-28
LOC108698721	23.6819	0.718121	0.542427	1.3239	0.185535	0.335206
LOC108698723	46.632	-1.0668	0.435017	-2.45231	0.0141943	0.0449988
LOC108698725	29.0513	0.179292	0.560931	0.319632	0.749247	0.854103
LOC108698731	16.5287	-0.209842	0.6438	-0.325942	0.744468	0.850829
LOC108698735	140.736	0.986323	0.260435	3.78722	0.000152343	0.000935272
LOC108698736	239.621	0.0917409	0.205084	0.447333	0.654635	0.786704
LOC108698739	89.065	0.0102375	0.31147	0.0328684	0.97378	0.986793
LOC108698741	1.76437	-3.06031	2.38968	-1.28064	0.200321	1
LOC108698753	153.997	-0.754193	0.272779	-2.76485	0.00569482	0.0210282
LOC108698755	1.28554	1.12063	2.68148	0.417916	0.676009	1
LOC108698757	474.641	-0.643904	0.171361	-3.75758	0.000171567	0.00103781
LOC108698758	1.04062	3.93356	2.68724	1.46379	0.14325	1
LOC108698759	2.80258	1.5971	1.50504	1.06117	0.288611	0.459058
LOC108698763	3.23773	-1.00408	1.52419	-0.658762	0.510048	0.672726
LOC108698766	169.493	1.00849	0.232629	4.3352	1.45627e-05	0.000115063	X
LOC108698773	23.5033	-0.598936	0.620869	-0.964674	0.334708	0.509282
LOC108698775	510.448	0.435512	0.194887	2.23469	0.0254378	0.0722925		X
LOC108698782	436.397	0.00990642	0.159427	0.0621376	0.950453	0.973803
LOC108698787	216.729	0.416147	0.214145	1.94329	0.0519805	0.12722
LOC108698788	42.1691	-0.557438	0.498577	-1.11806	0.263542	0.431071
LOC108698789	11.2228	-0.219452	0.926356	-0.236898	0.812736	0.896033
LOC108698791	2.1879	0.276965	2.27126	0.121944	0.902944	1
LOC108698796	2.53445	0.19085	2.22871	0.0856326	0.931758	0.964188
LOC108698799	438.181	-0.484798	0.188161	-2.5765	0.00998062	0.0335755
LOC108698800	3.91386	0.538412	1.18478	0.454441	0.649512	0.782803
LOC108698801	2.43704	0.242126	1.81803	0.13318	0.894051	0.94413
LOC108698802	2.80406	-0.497571	1.47052	-0.338365	0.735088	0.845028
LOC108698803	509.433	0.383467	0.178449	2.14889	0.0316433	0.0860244
LOC108698804	20.8056	-0.13669	0.500706	-0.272995	0.784857	0.877951
LOC108698806	1.6074	2.01361	3.04565	0.661143	0.508521	1
LOC108698808	35.0343	-0.334171	0.537532	-0.621676	0.534155	0.692855
LOC108698813	67.8363	-0.304363	0.312737	-0.973225	0.330441	0.504958
LOC108698814	2.18833	-2.64717	1.98091	-1.33634	0.181438	1
LOC108698815	523.035	-0.460066	0.175383	-2.62321	0.00871064	0.0299263		X
LOC108698817	18.6873	-1.44039	0.691639	-2.08258	0.0372895	0.0980095
LOC108698820	1601.84	0.0781094	0.134157	0.582226	0.560415	0.714041
LOC108698821	6.00301	-0.174341	0.975418	-0.178734	0.858146	0.922813
LOC108698822	94.7092	0.420134	0.303225	1.38555	0.165883	0.308514
LOC108698823	181.974	1.22105	0.252799	4.83011	1.36455e-06	1.36597e-05
LOC108698825	22.5706	-1.26265	0.598733	-2.10886	0.0349565	0.0932258
LOC108698829	69.2176	-0.0685516	0.423927	-0.161706	0.871537	0.930929
LOC108698830	75.6536	1.10468	0.302998	3.64585	0.000266513	0.00152317
LOC108698831	3.90214	-0.148905	1.30305	-0.114274	0.90902	0.952442
LOC108698835	73.2373	0.637441	0.3082	2.06827	0.0386142	0.100762		X
LOC108698836	39.8971	1.6482	0.422906	3.89731	9.72662e-05	0.000629578
LOC108698837	404.341	-0.434439	0.164009	-2.64888	0.00807595	0.0281214
LOC108698839	13.9366	1.10167	0.755445	1.4583	0.144758	0.278975
LOC108698840	176.812	-0.236428	0.259258	-0.911944	0.361798	0.536973
LOC108698843	4.86707	-0.645872	1.26206	-0.511758	0.60882	0.751461
LOC108698846	1.11491	-1.54194	2.83253	-0.54437	0.586187	1
LOC108698851	6.41912	-1.80328	1.0727	-1.68107	0.0927494	0.19907
[truncated: 33,722 more rows]

## Sheet: MB_st46v55
geneSymbol	baseMean	log2FoldChange	lfcSE	stat	pvalue	padj	NPC Enriched	IN Enriched
12S ribosomal RNA	77.0496	-0.354667	0.31476	-1.12679	0.259833	0.502076
16S ribosomal RNA	27009	-0.12583	0.150689	-0.835032	0.4037	0.643259
1a11.L	6.53734	-2.89707	1.12563	-2.57374	0.0100604	0.0572052
42sp43.L	1.59716	3.01728	2.2175	1.36067	0.173619	1
42sp50.L	4.39422	1.57713	1.33509	1.18129	0.237488	0.476058		X
ATP6	422.192	-0.456756	0.182661	-2.50057	0.0123993	0.0667328
ATP8	24.8953	-0.138024	0.495772	-0.278403	0.780703	0.897854
COX1	19338.1	-0.44741	0.117489	-3.8081	0.000140037	0.0021234
COX2	3788.69	-0.176707	0.202959	-0.870655	0.383942	0.626817
COX3	5527.09	-0.384305	0.172727	-2.22493	0.0260859	0.112498
CYTB	29.3519	-0.315383	0.545034	-0.578649	0.562826	0.764571
LOC100036663.S	1.80625	1.47889	2.4575	0.601786	0.547317	1
LOC100036800.S	1.12252	4.06653	3.24571	1.2529	0.210244	1
LOC100036803	679.422	-0.274756	0.153348	-1.79171	0.0731791	0.227398
LOC100036818	4.79567	-2.63633	1.31825	-1.99987	0.0455145	0.165909
LOC100036823	5.10454	-1.52828	1.21813	-1.25461	0.209621	0.442088
LOC100036824	1.67297	-0.0578201	2.72468	-0.0212209	0.983069	1
LOC100036831	399.79	-0.137212	0.190971	-0.718496	0.472452	0.699927
LOC100036845	5.87299	-0.509723	1.55793	-0.327179	0.743533	0.877786
LOC100036845.L	1.28729	3.35604	2.59719	1.29218	0.196295	1
LOC100036869	96.7205	0.540441	0.31179	1.73335	0.0830339	0.24713
LOC100036872	9.09164	1.46209	0.854783	1.71049	0.0871762	0.255302
LOC100036883	1.51176	1.74523	2.98328	0.585003	0.558546	1
LOC100036897	1.13502	1.30914	2.51658	0.520206	0.60292	1
LOC100036907.L	49.3918	0.794275	0.47259	1.68068	0.0928243	0.266022
LOC100036910	700.899	-0.166899	0.248793	-0.670834	0.502326	0.721733
LOC100036915	267.056	-0.691431	0.201813	-3.42611	0.000612303	0.00678529
LOC100036932	4.0773	1.34244	1.45497	0.922656	0.356187	0.601537
LOC100036952	22.047	1.46815	0.576615	2.54616	0.0108915	0.0608741
LOC100036976	10.7305	-1.08894	0.919929	-1.18372	0.236524	0.474866
LOC100036994	368.702	1.23414	0.184719	6.68115	2.3707e-11	2.94857e-09
LOC100036997	31.1515	0.798005	0.517999	1.54055	0.123425	0.320237
LOC100037001	448.341	0.0986445	0.17408	0.566663	0.570943	0.771156
LOC100037016	18.1945	-0.0711026	0.795016	-0.0894354	0.928736	0.968937
LOC100037047	1.04821	2.73456	2.80096	0.976294	0.328919	1
LOC100037090	242.52	0.0439436	0.219717	0.200001	0.84148	0.92897
LOC100037108	629.886	0.554154	0.172138	3.21924	0.0012853	0.0119895
LOC100037118	31.0167	0.268055	0.615981	0.435168	0.663441	0.831014
LOC100037145	10.6997	1.34224	0.895677	1.49857	0.133984	0.336227
LOC100037177	60.8503	4.94303	0.629325	7.85449	4.01406e-15	1.07566e-12
LOC100037180	9.87896	-0.63881	1.13058	-0.565026	0.572056	0.772128
LOC100037204	2.1138	-2.42036	2.04809	-1.18177	0.237299	1
LOC100037213	418.489	-0.651032	0.205468	-3.16853	0.00153212	0.0138365
LOC100037217	31.4085	-8.17535	1.27291	-6.42255	1.3401e-10	1.43639e-08
LOC100037226	194.274	-0.577191	0.250839	-2.30104	0.0213893	0.0980244
LOC100037235	62.35	-0.254275	0.348939	-0.72871	0.466179	0.695036
LOC100037903.1	2.65372	-0.206608	1.45542	-0.141957	0.887114	1
LOC100049113	12.4194	1.31725	0.838407	1.57114	0.116151	0.307651
LOC100049116	351.463	-0.336846	0.176542	-1.90802	0.0563881	0.191533
LOC100049121	324.809	0.415786	0.232271	1.79009	0.0734398	0.227844
LOC100049127	61.3578	-0.052042	0.312752	-0.1664	0.867842	0.94018
LOC100049136	1713.67	-0.286545	0.199873	-1.43364	0.151675	0.362342
LOC100049756	2.39611	-2.75688	2.09633	-1.3151	0.188477	1
LOC100101277	216.212	-0.907965	0.197944	-4.58698	4.49693e-06	0.000125408
LOC100101281	49.6533	-0.872125	0.350419	-2.4888	0.0128174	0.068337
LOC100101282	7.8298	1.46891	1.04365	1.40748	0.159286	0.373888
LOC100101283	87.7329	1.06883	0.338109	3.16119	0.00157124	0.0140862		X
LOC100101333	88.1008	1.02598	0.353039	2.90614	0.00365913	0.0268706
LOC100125664	5.57346	0.7707	1.246	0.618541	0.536218	0.745216
LOC100125668	243.621	0.140324	0.311116	0.451036	0.651963	0.82392
LOC100126603	30.4162	-0.45554	0.449014	-1.01453	0.310328	0.5549
LOC100126627	1.39741	-2.68778	2.70646	-0.993098	0.320662	1
LOC100126638	30.7823	-1.31697	0.477019	-2.76084	0.00576536	0.0377657
LOC100126648	82.0987	-0.0830518	0.330506	-0.251287	0.801592	0.908091
LOC100126651	20.8759	0.631395	0.568023	1.11157	0.266325	0.509043
LOC100126657	3.31009	0.941876	1.33266	0.706764	0.479713	0.705093
LOC100126660	98.5135	0.148654	0.302482	0.491445	0.623112	0.805026
LOC100127249	1.29718	-4.17133	2.98928	-1.39543	0.162886	1
LOC100127277	27.339	-5.59715	1.03869	-5.38865	7.099e-08	3.77756e-06
LOC100127280	27.1517	2.10283	0.525729	3.99982	6.33895e-05	0.00111156
LOC100127286	21.1439	0.105624	0.570982	0.184986	0.85324	0.933834
LOC100127287	2.3652	1.76419	1.97954	0.891215	0.372814	1
LOC100127296	104.984	-0.379442	0.286277	-1.32544	0.185027	0.409912
LOC100127300	119.273	0.0574843	0.273296	0.210337	0.833405	0.924947
LOC100127316	54.3099	0.0778088	0.397359	0.195815	0.844755	0.930525
LOC100127323	118.065	-0.241138	0.31631	-0.762349	0.445852	0.679298
LOC100127329	1961.72	-0.115194	0.100727	-1.14363	0.252779	0.493972
LOC100127334	2.94365	5.9812	1.97353	3.03071	0.00243981	1
LOC100127794.L	21.031	1.75176	0.923192	1.8975	0.0577622	0.194767
LOC100135120.L	105.348	-0.183217	0.282732	-0.648022	0.51697	0.731588
LOC100135146.L	3.77925	0.972779	1.4701	0.661711	0.508157	0.726101
LOC100135146.S	4.55752	-1.35758	1.26192	-1.0758	0.282015	0.52607
LOC100137612	78.0131	-0.404157	0.301314	-1.34132	0.179817	0.402558
LOC100137633	4.06569	2.01059	1.76985	1.13603	0.255945	0.497888
LOC100137634	228.452	0.517968	0.22877	2.26415	0.0235651	0.105056		X
LOC100137643	3.66984	1.35825	1.48487	0.914729	0.360334	0.605183
LOC100137665	4.49022	0.0784796	1.34764	0.058235	0.953561	0.979992
LOC100137672	23.0817	0.974261	0.565119	1.72399	0.0847093	0.250369
LOC100137672.S	111.763	1.66101	0.256679	6.47115	9.72594e-11	1.07974e-08
LOC100137678	2.38663	5.02955	2.14024	2.34999	0.0187738	1
LOC100137691	39.5655	-1.96825	0.427567	-4.60337	4.15703e-06	0.00011726
LOC100137715	1.23852	3.92613	2.89966	1.354	0.175738	1
LOC100145345.L	6.88824	-0.482646	1.0042	-0.480626	0.630783	0.810672
LOC100145450.S	138.558	-0.521375	0.238458	-2.18644	0.0287832	0.120398
LOC100145473.S	0.833656	3.34315	3.99	0.837881	0.402098	1
LOC100145531.L	21.7098	-0.450804	0.559045	-0.806382	0.420022	0.65772
LOC100145533.L	32.2171	0.755948	0.54593	1.3847	0.166145	0.384024
LOC100158280	5.42251	0.414943	1.62572	0.255236	0.798541	0.906633
LOC100158299	288.377	-0.361507	0.192021	-1.88264	0.0597487	0.198809
LOC100158305.L	8.71505	4.02668	1.67263	2.40739	0.0160672	0.0803414
LOC100158314	1.83778	2.67625	2.3118	1.15765	0.247009	1
LOC100158321	104.844	-0.234212	0.384337	-0.609392	0.542265	0.749733
LOC100158331	34.784	-0.248615	0.550257	-0.451816	0.651402	0.823552
LOC100158340	743.019	0.0404632	0.15967	0.253418	0.799945	0.907376
LOC100158347	217.995	0.193678	0.218578	0.886083	0.375573	0.619239
LOC100158361	288.106	-0.0735616	0.23745	-0.309799	0.756714	0.884724
LOC100158366	15.9368	0.711439	0.782382	0.909324	0.363179	0.607711
LOC100158370	143.857	-0.22611	0.248927	-0.908341	0.363698	0.608165
LOC100158382	120.119	-0.690505	0.238081	-2.90029	0.00372813	0.027208
LOC100158389	1.73351	-2.38257	2.28302	-1.0436	0.296669	1
LOC100158394	231.721	0.167793	0.176786	0.94913	0.342554	0.588054
LOC100158410.L	92.5139	-0.823948	0.299838	-2.74798	0.00599645	0.0389334
LOC100158433.L	41.2036	-1.46012	0.404945	-3.60572	0.00031129	0.00398953
LOC100158544.S	0.874413	2.35255	3.15753	0.745061	0.456235	1
LOC100170619.S	6.28503	-0.901144	1.08932	-0.827254	0.408093	0.64721
LOC100174801	6.93855	2.62074	1.18477	2.21203	0.0269646	0.115052
LOC100174804	476.356	-0.0252344	0.237308	-0.106336	0.915316	0.963186
LOC100174808	2.73476	1.65269	1.68142	0.982914	0.32565	1
LOC100189560	139.165	0.454501	0.368291	1.23408	0.217172	0.451134
LOC100189574	115.074	0.0159022	0.274392	0.0579544	0.953785	0.980119
LOC100191024	23.5494	-0.371121	0.614509	-0.603932	0.545889	0.752522
LOC100191026	282.476	-0.0047779	0.176585	-0.0270573	0.978414	0.991056
LOC100192369	14.3671	0.330995	0.670102	0.493948	0.621343	0.804043
LOC100217319	65.7123	-0.716498	0.77239	-0.927639	0.353595	0.599087
LOC100301958	51.8825	0.22006	0.406649	0.541154	0.588401	0.78303
LOC100335021	19.9947	-0.384473	0.579258	-0.663733	0.506861	0.725103
LOC100335115	1184.31	-0.123357	0.7464	-0.165269	0.868732	0.940626
LOC100337617	2.10475	-0.0379682	2.17923	-0.0174228	0.986099	1
LOC100379118	13.6341	-0.189934	0.811327	-0.234103	0.814905	0.916026
LOC100462904	1013.69	-0.308281	0.170189	-1.8114	0.070079	0.220987
LOC100462905	1008.19	-0.559353	0.228304	-2.45004	0.0142841	0.0738299
LOC100485017.S	1.81832	2.89832	2.07544	1.39648	0.162569	1
LOC100485044.L	3.34808	-2.25043	1.63073	-1.38001	0.167584	0.386139
LOC100485105.S	1.77263	-3.44513	2.40612	-1.43182	0.152197	1
LOC100485199-like.S	30.8131	1.23469	0.565236	2.18438	0.0289347	0.120894
LOC100485290.L	44.2678	0.00914064	0.392436	0.023292	0.981417	0.992463
LOC100485292.L	3.01744	0.483056	1.87284	0.257926	0.796464	1
LOC100485470.1.L	24.7381	1.95402	0.554133	3.52627	0.000421452	0.00504178
LOC100485669.L	15.8257	3.68326	1.02156	3.60551	0.00031154	0.00399099
LOC100485723.L	2.07975	-3.43423	2.30261	-1.49145	0.135843	1
LOC100485829.S	15.4112	4.69935	1.05804	4.44155	8.93133e-06	0.000223109
LOC100485975.L	2.73812	-2.81346	2.26139	-1.24412	0.213454	1
LOC100486127.S	10.3846	-0.678501	1.04622	-0.648528	0.516644	0.731529
LOC100486133.S	78.3363	-0.19416	0.383499	-0.506284	0.612657	0.798695
LOC100486352-like.S	1.09401	2.94288	2.83615	1.03763	0.299441	1
LOC100486380.L	6.92637	0.118168	0.90753	0.130208	0.896402	0.954905
LOC100486434-like.L	1.44457	0.945803	2.2473	0.420862	0.673856	1
LOC100486734-like.L	4.57354	-0.678796	1.11588	-0.608305	0.542985	0.750185
LOC100486734-like.S	4.00247	-1.85479	1.36871	-1.35513	0.175376	0.396689
LOC100486894.S	1.72942	-0.331278	1.74272	-0.190093	0.849237	1
LOC100486966.L	5.31315	1.56536	1.23871	1.2637	0.206338	0.438264
LOC100487224.L	74.0552	1.07293	0.454071	2.36291	0.0181319	0.0873608
LOC100487262.S	70.1119	-0.0892245	0.287119	-0.310758	0.755985	0.88435
LOC100487412.L	1.96313	0.866463	2.48622	0.348507	0.72746	1
LOC100487482.S	1.60969	0.703493	2.38702	0.294716	0.768211	1
LOC100487499.S	223.009	-0.248708	0.188566	-1.31895	0.187187	0.41321
LOC100487668.L	11.814	-0.862277	0.781076	-1.10396	0.26961	0.512894
LOC100487740.S	1.99313	-2.68177	2.42264	-1.10696	0.26831	1
LOC100488087.L	23.9403	0.224526	0.576245	0.389636	0.696806	0.851133
LOC100488177.S	2.37007	2.05227	1.70284	1.2052	0.228126	1
LOC100488227.L	1.6941	2.82764	2.2519	1.25567	0.209237	1
LOC100488333.L	16.8424	0.239188	0.710162	0.336807	0.736262	0.873731
LOC100488348.S	4.38502	-0.822183	1.29131	-0.636707	0.524316	0.736568
LOC100488442.S	23.1953	-0.142021	0.593292	-0.239378	0.810813	0.9139
LOC100488486.L	2.634	-1.30943	1.47161	-0.889798	0.373574	1
LOC100488567.L	125.525	0.70943	0.266207	2.66496	0.00769981	0.0470106
LOC100488577.L	3.49837	-0.790633	1.85275	-0.426735	0.669572	0.834532
LOC100488626.L	45.82	-1.39789	0.389161	-3.59207	0.000328064	0.0041575
LOC100488689.S	100.338	-0.84991	0.379736	-2.23816	0.0252106	0.110045
LOC100488697.L	4.6125	0.592657	1.34421	0.440895	0.659289	0.828315
LOC100488701.S	2.60916	0.584935	1.69984	0.344112	0.730762	1
LOC100488828.L	1.26721	2.19024	2.60987	0.839212	0.401351	1
LOC100488885-like.L	356.046	0.362926	0.164407	2.20748	0.0272804	0.116038
LOC100489122.L	11.0571	1.24828	0.868157	1.43785	0.150478	0.36068
LOC100489188.L	6.96266	-2.58569	1.23765	-2.08919	0.0366908	0.143193
LOC100489326.S	7.44812	1.61094	0.994426	1.61997	0.105238	0.288784
LOC100489554.L	1.12004	3.28083	3.18543	1.02995	0.303033	1
LOC100489764.L	2.14716	0.0205389	1.87417	0.0109589	0.991256	1
LOC100489771.S	70.2018	0.276585	0.347218	0.796574	0.425698	0.662923
LOC100489773-like.S	23.4693	0.724429	0.583494	1.24153	0.214408	0.447726
LOC100489832.L	1.18282	-0.903217	2.41554	-0.37392	0.708464	1
LOC100489882.L	1.44018	2.32576	2.7381	0.849406	0.395655	1
LOC100490018.L	3.80207	-0.0889362	1.57068	-0.0566227	0.954846	0.980594
LOC100490389-like.L	1.6631	0.144415	2.2585	0.063943	0.949016	1
LOC100490462.L	3.07423	-2.10586	1.47743	-1.42536	0.154054	1
LOC100490530.L	60.0348	-0.365265	0.303452	-1.2037	0.228707	0.465354
LOC100490553.S	1.50608	3.74086	2.6656	1.40338	0.160503	1
LOC100490559.S	31.3141	0.438561	0.443622	0.988591	0.322863	0.56791
LOC100490741.L	36.4257	0.0580707	0.476896	0.121768	0.903083	0.957668
LOC100490918.L	1.70406	-0.381119	2.19103	-0.173945	0.861909	1
LOC100490937.L	1.25765	0.396012	2.22744	0.177788	0.85889	1
LOC100491211.L	8.09842	1.96614	1.20438	1.63249	0.102577	0.284179
LOC100491437-like.L	22.8796	-0.953981	0.737187	-1.29408	0.195637	0.424785
LOC100491450.S	8.72397	-1.26622	0.929864	-1.36173	0.173283	0.393912
LOC100491454.L	1.79952	-1.11205	1.97051	-0.564344	0.57252	1
LOC100491587.L	2.95658	-1.47874	2.30464	-0.641638	0.521108	1
LOC100491616-like.L	9.2335	-0.0480282	0.876536	-0.0547932	0.956303	0.981236
LOC100491629.S	1.38906	0.383658	2.32609	0.164937	0.868993	1
LOC100491907.S	2.72798	-0.0244481	1.35964	-0.0179812	0.985654	1
LOC100491930.L	8.12813	5.06185	1.56541	3.23356	0.00122256	0.0115319
LOC100491939.S	225.955	0.647473	0.195107	3.31856	0.000904838	0.00919721
LOC100492080.1	1.62793	3.5066	2.18495	1.60489	0.108518	1
LOC100492197-like.L	330.819	0.444415	0.179221	2.4797	0.0131491	0.0695976
LOC100492420.S	2.15204	-2.67031	1.99503	-1.33848	0.18074	1
LOC100492487.S	145.206	0.0453931	0.32231	0.140837	0.887999	0.950559
LOC100492639-like.S	2.64606	-0.592769	1.40866	-0.420804	0.673898	1
LOC100492643.L	1.45606	0.937534	2.1767	0.430713	0.666677	1
LOC100492708	36.0038	0.812847	0.453381	1.79285	0.0729962	0.227025
LOC100492859.S	1.80366	1.30027	2.13503	0.609019	0.542512	1
LOC100492885.L	63.649	0.620632	0.354	1.7532	0.0795683	0.24041
LOC100492888-like.L	19.8296	1.21957	0.657801	1.85401	0.0637382	0.207374
LOC100492899.L	3.09139	0.162788	1.73342	0.0939114	0.92518	1
LOC100492951-like.S	238.189	-0.455513	0.246946	-1.84459	0.0650973	0.210149
LOC100493071.L	4.49678	1.36599	1.6227	0.841801	0.3999	0.64033
LOC100493076.L	1.01171	-4.28886	3.14514	-1.36365	0.172679	1
LOC100493184.L	1.51629	2.84395	2.28086	1.24687	0.212443	1
LOC100493237.L	3.69492	1.00757	1.79199	0.562262	0.573938	0.773746
LOC100493283-like.L	33.6461	-0.765724	0.466859	-1.64016	0.100971	0.281477
LOC100493356.L	1.08105	3.43127	2.69211	1.27456	0.202464	1
LOC100493381.L	1.41802	4.71006	2.52128	1.86812	0.0617449	1
LOC100493382.L	79.6197	0.571514	0.315984	1.80868	0.0705013	0.22186
LOC100493512.1	1.05939	-2.11142	2.83687	-0.744278	0.456708	1
LOC100493618.L	1.87858	0.00651082	2.24991	0.00289382	0.997691	1
LOC100493672.L	1.46381	2.43439	2.09292	1.16316	0.244765	1
LOC100493745.L	268.344	-0.131305	0.203982	-0.643708	0.519765	0.733348
LOC100493912.S	23.0965	-0.368918	0.643223	-0.573546	0.566275	0.767496
LOC100493955.L	1.47515	-1.63067	2.91348	-0.559699	0.575685	1
LOC100493968.1.L	32.127	3.01096	0.584022	5.15556	2.52874e-07	1.10593e-05
LOC100494033.L	4.86352	0.0646557	1.30106	0.0496945	0.960366	0.982993
LOC100494136.L	2.84899	2.34688	1.55223	1.51194	0.130549	1
LOC100494386.L	14.9147	0.027173	0.58665	0.0463189	0.963056	0.984132
LOC100494476.L	69.0303	0.10295	0.341371	0.301579	0.762973	0.887866
LOC100494536.S	1.78395	2.96289	2.18668	1.35497	0.175427	1
LOC100494604.L	1.29805	4.1734	2.6115	1.59808	0.110024	1
LOC100494943.L	1.45592	4.72464	2.82108	1.67476	0.0939808	1
LOC100495010.S	96.5166	0.364321	0.268579	1.35648	0.174947	0.396172
LOC100495012.S	1.978	3.99967	1.99643	2.00341	0.0451332	1
LOC100495096.1	1.58538	0.184244	2.11985	0.0869136	0.93074	1
LOC100495101.S	1.88084	3.46138	2.34868	1.47375	0.140548	1
LOC100495179.L	9.07719	-0.302768	0.928171	-0.326198	0.744274	0.878178
LOC100495222.1.L	1.74412	0.645377	2.17191	0.297148	0.766354	1
LOC100495347.1	1.78709	3.51554	2.16231	1.62583	0.103986	1
LOC100495379.L	2.80824	0.32076	1.66908	0.192178	0.847603	1
LOC100495655-like.S	1.49785	3.38339	2.56768	1.31768	0.187609	1
LOC100495874.L	1.10773	3.72341	3.3162	1.12279	0.261526	1
LOC100495895.S	74.9572	0.323126	0.323115	1.00003	0.317295	0.562073
LOC100496010.S	9.55725	0.798013	0.814534	0.979717	0.327226	0.572044
LOC100496074-like.L	6.14292	1.50561	0.937052	1.60676	0.108108	0.294009
LOC100496137-like.L	37.5101	0.62536	0.554228	1.12834	0.259175	0.501376
LOC100496293.L	1.50435	-2.53265	2.60438	-0.972457	0.330823	1
LOC100496329.S	10.5843	-1.1458	0.960399	-1.19304	0.232852	0.470219
LOC100496372.L	1.62932	3.75337	2.80588	1.33768	0.181001	1
LOC100496462.L	21.624	1.91464	0.666997	2.87054	0.00409776	0.029083
LOC100496618.L	1.18367	-2.90365	2.69151	-1.07882	0.280669	1
LOC100496658.L	12.0359	0.659714	0.735915	0.896455	0.37001	0.614545
LOC100496716.L	35.412	1.39916	0.624419	2.24073	0.0250433	0.109537
LOC100496797-like.L	34.8152	-0.0526294	0.563742	-0.0933573	0.92562	0.96766
LOC100496797.L	129.416	0.209481	0.307366	0.681535	0.495533	0.716678
LOC100496837.S	4.42662	0.0235221	1.32119	0.0178037	0.985795	0.993881
LOC100496844.L	3.79966	0.904111	1.28623	0.702916	0.482108	0.706729
LOC100496870.L	5.09047	-0.298689	1.22131	-0.244564	0.806794	0.911581
LOC100496873.L	2.63081	-1.74731	1.75822	-0.993793	0.320323	1
LOC100496891.S	3.5588	0.0198453	1.17009	0.0169606	0.986468	0.994328
LOC100496975.L	2.08035	1.30129	2.35286	0.553067	0.580217	1
LOC100496975.S	40.265	0.328806	0.422953	0.777407	0.436919	0.672044
LOC100497020.L	9.80164	0.715559	0.946661	0.755877	0.449723	0.682125
LOC100497184.L	247.777	0.174109	0.248569	0.700445	0.48365	0.708019
LOC100497309.L	3.92063	-0.96825	1.62105	-0.597298	0.550308	0.755153
LOC100497432.L	1.21096	0	3.49582	0	1	1
LOC100497489.S	10.8505	0.861566	0.739027	1.16581	0.243691	0.48343
LOC100497500.S	3.32529	0.0103003	1.31823	0.00781371	0.993766	0.997413
LOC100497556.L	4.0537	-1.82919	1.31585	-1.39012	0.164492	0.381748
LOC100497703.S	13.2074	-0.942817	0.758081	-1.24369	0.213614	0.446955
LOC100497709.L	3.35406	-0.61507	1.39875	-0.439728	0.660134	0.82888
LOC100497740.L	4.90745	3.09765	1.65202	1.87506	0.0607838	0.201221
LOC100497848.L	3.64308	4.32766	1.71712	2.5203	0.0117254	0.0642671
LOC100497909.S	11.4367	0.0457065	0.840572	0.0543755	0.956636	0.981441
LOC100497953.L	13.5743	-2.16397	0.823333	-2.6283	0.00858122	0.0509462
LOC100498064.L	1.62266	0.774884	2.083	0.372004	0.70989	1
LOC100498247.S	1.32667	-1.08178	2.41874	-0.447248	0.654696	1
LOC100498327.L	13.4315	0.583745	0.725271	0.804864	0.420898	0.6585
LOC100498450.S	1.78981	-1.3069	2.01186	-0.649602	0.51595	1
LOC100498477.L	2.42838	4.43143	2.25447	1.96562	0.0493422	1
LOC100498517.L	27.5458	-0.0721939	0.448585	-0.160937	0.872143	0.942495
LOC100498590.S	1.75614	2.1989	1.98129	1.10983	0.267071	1
LOC100498594.S	1.78526	1.00906	2.54935	0.39581	0.692245	1
[truncated: 35,435 more rows]

## Sheet: MB_st46v61
geneSymbol	baseMean	log2FoldChange	lfcSE	stat	pvalue	padj	NPC Enriched	IN Enriched
[truncated: 35,721 more rows]

[truncated: 1 more sheets: MB_st55v61]
